1 Genome-wide association study of body fat distribution traits in Hispanics/Latinos  
2 from the HCHS/SOL Study

3  
4 Anne E. Justice<sup>1,2,¶,\*</sup>, Kristin Young<sup>2,¶</sup>, Stephanie M. Gogarten<sup>3</sup>, Tamar Sofer<sup>3</sup>, Misa Graff<sup>2</sup>, Shelly Ann  
5 Love<sup>2</sup>, Yujie Wang<sup>2</sup>, Yann C. Klimentidis<sup>4</sup>, Miguel Cruz<sup>5</sup>, Xiuqing Guo<sup>6</sup>, Fernando Hartwig<sup>7</sup>, Lauren Petty<sup>8</sup>,  
6 Jie Yao<sup>6</sup>, Matthew A. Allison<sup>9</sup>, Jennifer E. Below<sup>8</sup>, Thomas A. Buchanan<sup>10</sup>, Yii-Der Ida Chen<sup>6</sup>, Mark O.  
7 Goodarzi<sup>11</sup>, Craig Hanis<sup>12</sup>, Heather M. Highland<sup>2</sup>, Willa A. Hsueh<sup>13</sup>, Eli Ipp<sup>14</sup>, Esteban Parra<sup>15</sup>, Walter  
8 Palmas<sup>16</sup>, Leslie J. Raffel<sup>17</sup>, Jerome I. Rotter<sup>6</sup>, Jingyi Tan<sup>6</sup>, Kent D. Taylor<sup>6</sup>, Adan Valladares<sup>5</sup>, Anny H.  
9 Xiang<sup>18</sup>, Lisa Sánchez-Johnsen<sup>19</sup>, Carmen R. Isasi<sup>20</sup>, Kari E. North<sup>2</sup>

10

11 <sup>1</sup> Population Health Sciences, Geisinger Health System, Danville, PA, USA

12 <sup>2</sup> Department of Epidemiology, University of North Carolina at Chapel Hill, Chapel Hill, NC, USA

13 <sup>3</sup> Department of Biostatistics, University of Washington, Seattle, WA

14 <sup>4</sup> Department of Epidemiology and Biostatistics, University of Arizona, Tucson, AZ, USA

15 <sup>5</sup> Unidad de Investigacion Medica en Bioquimica, Hospital de Especialidades, CMNSXX1-IMSS, Mexico  
16 City, Mexico

17 <sup>6</sup> The Institute for Translational Genomics and Population Sciences, Department of Pediatrics, The  
18 Lundquist Institute for Biomedical Innovation at Harbor-UCLA Medical Center, Torrance, CA USA

19 <sup>7</sup> Center for Epidemiological Research, Universidade Federal de Pelotas, Pelotas, Brazil

20 <sup>8</sup> Vanderbilt Genetics Institute, Division of Genetic Medicine, Department of Medicine, Vanderbilt  
21 University Medical Center, Nashville, TN, USA

22 <sup>9</sup> Division of Preventive Medicine, Department of Family Medicine and Public Health, University of  
23 California San Diego, La Jolla, CA USA

24 <sup>10</sup> Department of Physiology and Biophysics and Department of Medicine, Keck School of Medicine of  
25 USC, Los Angeles, CA USA

26 <sup>11</sup> Division of Endocrinology, Diabetes, and Metabolism, Department of Medicine, Cedars-Sinai Medical  
27 Center, Los Angeles, CA USA

28 <sup>12</sup>Human Genetics Center, Department of Epidemiology, Human Genetics and Environmental Sciences,  
29 School of Public Health, The University of Texas Health Science Center at Houston, Houston, TX 77030  
30 USA

31 <sup>13</sup> Division of Endocrinology, Diabetes and Metabolism, Department of Medicine, Wexner Medical  
32 Center, The Ohio State University, Columbus, OH USA

33 <sup>14</sup> Department of Medicine, Endocrinology, Diabetes & Metabolism, The Lundquist Institute for  
34 Biomedical Innovation at Harbor-UCLA Medical Center, Torrance, CA USA

35 <sup>15</sup>Department of Anthropology, University of Toronto at Mississauga, Mississauga, Ontario, Canada

36 <sup>16</sup> Department of Medicine, Columbia University Medical Center, New York, NY USA

37 <sup>17</sup> Department of Pediatrics, Division of Genetic and Genomic medicine, University of California, Irvine,  
38 CA USA

39 <sup>18</sup> Department of Research and Education, Kaiser Permanente Southern California, Pasadena, CA, USA

40 <sup>19</sup> Department of Family Medicine, Rush University Medical Center, Chicago, Illinois, USA

41 <sup>20</sup> Department of Epidemiology & Population Health, Department of Pediatrics, Albert Einstein College of  
42 Medicine, Bronx, NY

43

44 \* Corresponding author

45 E-mail: [aejustice1@geisinger.edu](mailto:aejustice1@geisinger.edu)

46

47 ¶ The authors wish it to be known that, in their opinion, the first two authors should be regarded as  
48 joint First Authors.

49

## 50 **Author contributions**

51 Conceived of Study Design: AEJ, KY, KEN; Drafted Manuscript: AEJ, KY, KEN, MG, SAL; Acquisition of  
52 Data: AEJ, KEN, CL, CI; Data Preparation: SMG, TS; Performed Statistical Analyses: SMG, TS, AEJ, LEP, YW;  
53 Prepared Figures and Table: AEJ, KL, SAL, MG, SMG, TS; Performed Look-ups: AEJ; Supervised the work:  
54 KEN, CL, CI. All authors revised and approved the manuscript, assisted in interpretation of results, and  
55 agree to be held accountable for the content.

56

## 57 **Abstract**

58 Central obesity is a leading health concern with a great burden carried by ethnic minority populations,  
59 and especially Hispanics/Latinos. Genetic factors contribute to the obesity burden overall and to inter-  
60 population differences. We aim to: 1) identify novel loci associated with central adiposity measured as  
61 waist-to-hip ratio (WHR), waist circumference (WC), and hip circumference (HIP), all adjusted for body  
62 mass index (adjBMI), using the Hispanic Community Health Study/Study of Latinos (HCHS/SOL); 2)  
63 determine if differences in genetic associations differ by background group within HCHS/SOL; 3)  
64 determine whether previously reported association regions generalize to HCHS/SOL. Our analyses  
65 included 7,472 women and 5,200 men of mainland (Mexican, Central and South American) and  
66 Caribbean (Puerto Rican, Cuban, and Dominican) background residing in the US, with genome-wide  
67 array data imputed to the 1000 genomes Phase I multiethnic reference panel. We analyzed associations  
68 stratified by sex in addition to sexes combined using linear mixed-model regression. We identified 16  
69 variants for WHRadjBMI, 22 for WCadjBMI, and 28 for HIPadjBMI that reached suggestive significance  
70 ( $P < 1 \times 10^{-6}$ ). Many of the loci exhibited differences in strength of associations by ethnic background and  
71 sex. We brought a total of 66 variants forward for validation in nine cohort studies (N=34,161) with  
72 participants of Hispanic/Latino, African and European descent. We confirmed four novel loci (ancestry-  
73 specific  $P < 0.05$  in replication, consistent direction of effect with HCHS/SOL, and  $P < 5 \times 10^{-8}$  after meta-  
74 analysis with HCHS/SOL), including rs13301996 in the sexes-combined analysis, and rs79478137 for  
75 women-only for WHRadjBMI; rs28692724 in women-only for HIPadjBMI; and rs3168072 in the sexes  
76 combined analysis for WCadjBMI. Also, a total of eight previously reported WHRadjBMI association  
77 regions, 12 for HIPadjBMI, and 10 for WCadjBMI generalized to HCHS/SOL. Our study findings highlight  
78 the importance of large-scale genomic studies in ancestrally diverse Hispanic/Latino populations for  
79 identifying and characterizing central obesity-susceptibility that may be ancestry-specific.

## 80 Introduction

81

82 Obesity, and especially central obesity, is a leading risk factor for metabolic and cardiovascular  
83 diseases, with the greatest burden carried by minority populations (1-4), particularly Hispanic/Latino  
84 Americans and African Americans (5). Emerging evidence suggests that genetic factors may contribute  
85 not only to the obesity burden overall, explaining 40% to 70% of the inter-individual variation (6), but  
86 also to population-specific differences in obesity susceptibility (7-12). For example, although a majority  
87 of the >1000 genome-wide association study (GWAS)-identified obesity (body mass index (BMI), waist-  
88 to-hip ratio (WHR), waist circumference (WC), hip circumference (HIP), and body fat percentage) loci  
89 generalize across populations (13-20), recent studies in populations of Asian (19, 20) and African (16, 21)  
90 ancestry have revealed a number of novel and population-specific loci. These observations highlight the  
91 importance of large-scale genomic studies in ancestrally diverse populations, including Hispanic/Latinos,  
92 to identify obesity-susceptibility loci, and more specifically, alleles that are ancestry-specific and may  
93 thus partly explain disparities. However, no large-scale GWAS for any obesity-related traits has been  
94 performed in Hispanic/Latino populations, despite their increased prevalence of obesity.

95 While obesity is commonly assessed by BMI, measures of central adiposity such as WHR and WC  
96 are predictors of increased cardiometabolic risk independent of BMI (22-25). Here we consider three  
97 measures of central obesity: WHR, WC, and HIP after accounting for overall body size, measured as body  
98 mass index (BMI) (WHRadjBMI, WCadjBMI, HIPadjBMI). Larger WHR indicates increased abdominal fat  
99 and is associated with increased risk for type 2 diabetes (T2D) and cardiovascular disease (CVD) (26-28),  
100 while smaller WHR indicates a proportionately greater fat accumulation around the hips, and is  
101 associated with lower risk for T2D, hypertension and dyslipidemia (29). Previous GWAS have identified  
102 WHR, WC, and HIP loci that are enriched for association with other cardiometabolic traits and suggested  
103 that different fat distribution patterns can have distinct genetic underpinnings (30-32). Identifying

104 genetic risk variants across these traits in Hispanic/Latinos may provide insights into these mechanisms  
105 and highlight population-specific variants that increase susceptibility to obesity in specific groups.

106 We aimed to: 1) identify novel genetic loci associated with central obesity, measured here as  
107 WHRadjBMI, WCadjBMI, and HIPadjBMI, in Hispanics/Latinos; 2) determine if differences in genetic  
108 associations by background group (mainland or Caribbean) and sex exist in HCHS/SOL; and 3) assess  
109 generalization of central adiposity associated loci discovered in European, African and multi-ethnic  
110 studies to Hispanics/Latinos.

111

## 112 **Results**

113

### 114 **Discovery**

115 We identified 16 loci for WHRadjBMI, 22 for WCadjBMI, and 28 for HIPadjBMI that exhibited  
116 suggestive evidence of association in the HCHS/SOL in at least one stratum (**Table 1, Figures 1-3,**  
117 **Supplementary Tables 2-4, Supplementary Figures 1-12**). For WHRadjBMI, we identified four loci that  
118 reach suggestive significance ( $P < 1 \times 10^{-6}$ ) in the combined sexes, including rs12435790 near *KIAA0391*,  
119 which is within a previously reported WHRadjBMI locus (+/- 500 Kb from tag SNP) (33). We also  
120 identified five loci for men only, including one reaching genome-wide significance (GWS,  $P < 5 \times 10^{-8}$ ). A  
121 total of eight suggestive loci were identified in the women-only analyses, including one, rs115981023 in  
122 *TAOK3*, which also reached suggestive significance in the combined sexes analysis, and rs79478137 in  
123 *SLC22A18AS* near a previously implicated WHRadjBMI locus(34). For WCadjBMI, we identified nine loci,  
124 including one GWS locus in the combined sexes; 11 for men only, including two SNPs that reach GWS;  
125 and two for women only. Of the WCadjBMI loci identified, two were nearby previously-reported  
126 WCadjBMI loci, rs6809759 near *PROK2* (men-only) (15, 17, 35) and rs77319470 near *ADAMTS3* (sexes-  
127 combined) (15, 17, 36). For HIPadjBMI, we identified eight loci that reach  $p < 1 \times 10^{-6}$  for the combined

128 sexes; nine for men only, including one in a locus that reached suggestive significance for the combined  
129 sexes as well (near *ANO10*); and 12 for women only, including one SNP in a locus that reached  
130 suggestive significance for the combined sexes as well (near *LPPR4*). Of the WCadjBMI loci, rs10818474  
131 near *MEGF9* was within 500 Kb of a recently reported WHRadjBMI association in women (35).

132

### 133 **Association Differences by Genetic Ancestry**

134 All of the top loci were directionally consistent in each background group, yet many of the loci  
135 exhibited effect heterogeneity by background group (**Table 2, Figures 1-3, Supplementary Tables 5-7**),  
136 as exhibited by moderate to high  $I^2$  values ( $ISQ>65\%$ ) and/or significant interaction across subgroups  
137 ( $P_{diff}<0.05$ ). For example, rs113818604 ( $\beta=0.0269$ ,  $P=5.47 \times 10^{-8}$ ),  $I^2=78.5\%$ ,  $P_{diff}=0.38$ ) in *NTM* is  
138 significantly associated with WHRadjBMI in women from the mainland background groups (N=4220,  
139 MAF=0.014,  $\beta=0.0343$ ,  $P=1.63 \times 10^{-8}$ ), but not in women from Caribbean background groups (N=3238,  
140 MAF=0.013,  $\beta=0.0144$ ,  $P=0.08$ ) (**Supplementary Table 5**). Also, for the women-only primary analysis, the  
141 rs77186623 in *LOC105375745* locus associated with HIPadjBMI ( $\beta=-0.006$ ,  $P=1.74 \times 10^{-7}$ ) exhibited  
142 nominally significant interaction by background group ( $I^2=55.3\%$ ,  $P_{diff}=0.042$ ), and was GWS in the  
143 Caribbean group (N=3231, MAF=0.041,  $\beta=-0.0078$ ,  $P=3.05 \times 10^{-8}$ ), but not significant in the mainland  
144 group (N=4216, MAF=0.008,  $\beta=-0.0015$ ,  $P=0.567$ , **Supplementary Table 7**). Additional examples that  
145 cannot be explained due to power (i.e. MAF and sample size are similar) for WHRadjBMI include  
146 rs77377042 near *MARCKSL1* and rs61305557 in *C19orf67* for women, and rs16977373 near *RIT2* for  
147 men; for WCadjBMI in women-only include rs76842062 in *MAP4K4* and rs76941364 near *COBL*; and for  
148 HIPadjBMI rs6860625 near *NREP* for women and rs145815581 in *ANO10* for the combined sexes.

149 For other loci, allele frequency and linkage disequilibrium (LD) differences across  
150 Hispanic/Latino populations likely contributed to observed differences in magnitude of effect and  
151 significance levels (**Supplementary Table 8**). For example, while the magnitude of effect for the

152 rs115981023 *TAOK3* association with WHRadjBMI in women ( $\beta=-0.029$ ,  $P=8.88 \times 10^{-7}$ ,  $I^2=0$ ,  $P_{diff}=0.391$ )  
153 was similar across background groups, the P-value was far more significant in the Caribbean background  
154 group (MAF=0.016,  $\beta=-0.030$ ,  $P=2.72 \times 10^{-5}$ ) compared to the mainland (MAF=0.003,  $\beta=-0.027$ ,  $P=0.025$ ),  
155 likely due to the higher MAF in the Caribbean group. Of note, the minor allele at this SNP is more  
156 common in the 1000 Genomes AFR compared to the EUR and AMR reference samples (**Supplementary**  
157 **Table 5**) and the local ancestry of participants at this locus indicate that those with African ancestry  
158 exhibit the highest MAF (**Supplementary Table 8**). Additional loci where the significance level  
159 differences between Caribbean and mainland background groups appear to be driven by increased MAF  
160 due to African ancestry in Caribbean populations include the *SLC22A18AS* and *CDH4* loci for  
161 WHRadjBMI; *LOC102723448*, *FZD7*, *WSB2*, and *ACTRT2* loci for WCadjBMI; and *COQ2*, *LPPR4*, *TMEM63A*,  
162 and *FHIT* loci for HIPadjBMI (**Supplementary Tables 5-8**). Rs12478843 in *HEATR5B* ( $\beta=-0.002$ ,  $P=8.2 \times 10^{-8}$ ,  
163  $I^2=1.7\%$ ,  $P_{diff}=0.385$ ) is more significantly associated with HIPadjBMI in mainland (MAF=0.320,  $\beta=-0.002$ ,  
164  $P=6.50 \times 10^{-6}$ ) women compared to Caribbean (MAF=0.154,  $\beta=-0.002$ ,  $P=6.03 \times 10^{-3}$ ), likely reflecting the  
165 higher MAF among those from mainland Latin America with greater Native American ancestry  
166 (**Supplementary Table 8**). Similarly, differences in effect magnitude between mainland and Caribbean  
167 background groups for the *TAF4* (HIPadjBMI in women) and the *ESRRG* (WCadjBMI in men) loci may also  
168 be due to higher MAF in the mainland group because of a greater proportion of Native American  
169 ancestry (**Supplementary Tables 6-8**).

170

## 171 **Replication**

172 We brought 66 variants forward for replication in nine cohort studies (N up to 34,161) with  
173 participants of Hispanic/Latino, African and European descent, and for further examination of  
174 replication by ancestral background (**Table 1**, **Supplementary Tables 1-4**, **Supplementary Figures 10-12**).  
175 Our criteria for replication included both nominal evidence of an association ( $P<0.05$ ), consistent



176 direction of effect between the replication results and the HCHS/SOL discovery results for any  
177 ancestry/sex stratum, and genome-wide significance ( $P < 5 \times 10^{-8}$ ) when meta-analyzed together with  
178 HCHS/SOL. Based on these criteria, we were able to replicate four novel loci (**Table 1**) after combining  
179 our HCHS/SOL discovery sample with specific ancestry results. For WHRadjBMI in men and women  
180 combined, rs13301996 was significant after meta-analyzing HCHS/SOL with the African American  
181 replication sample ( $P = 2.88 \times 10^{-8}$ ). For WHRadjBMI in women only, rs79478137 was GWS after combining  
182 HCHS/SOL with the Hispanic/Latino replication sample ( $P = 3.64 \times 10^{-9}$ ). For HIPadjBMI in women only,  
183 rs28692724 was significant after meta-analyzing HCHS/SOL with the European American replication  
184 sample ( $P = 4.02 \times 10^{-8}$ ). For WCadjBMI in men and women combined, rs3168072 was significant after  
185 combining HCHS/SOL with the European American replication sample ( $P = 4.21 \times 10^{-8}$ ).

186         Of note, for rs13301996, which only replicated in African Americans, we see a larger effect size  
187 in the Caribbean background group compared to the mainland, although this is not a significant  
188 difference (**Table 2, Supplementary Table 5 Supplementary Figure 10**). This finding may provide insight  
189 into why the variants were more successful upon replication with a particular ancestry. For the  
190 remaining loci there is little difference in effect magnitude between the Caribbean and the mainland  
191 background groups that could explain differences in replication by ancestral group.

## 192 **Generalization of Previous Loci**

193         We examined previously reported association regions from the GIANT Consortium (35) to assess  
194 generalization to the HCHS/SOL (**Supplementary Tables 9-11, Supplementary Figures 13-21**). To account  
195 for differences in LD between GIANT (primarily European descent populations) and HCHS/SOL (highly  
196 admixed Hispanic/Latino populations), we report generalization results based on the lead generalized  
197 SNP (the SNP with lowest  $r$ -value in the region of the previously reported variant in GIANT). In sex  
198 combined analyses, there were a total of 12 association regions across the genome that generalized to  
199 HCHS/SOL for WHRadjBMI ( $r < 0.05$ ), including three for both women-only and sexes combined, three for

200 women-only, and six for the sexes-combined analysis (**Supplementary Table 9**). A total of 15 association  
201 regions generalized to HCHS/SOL for WCadjBMI, including seven sex-specific loci (two for men, five for  
202 women, **Supplementary Table 10**), one for the sexes-combined only, and seven for more than one  
203 stratum. Of note, we identified rs6809759 near *PROK2*, which was significantly associated with  
204 WCadjBMI in HCHS/SOL for men-only and sexes-combined and was within 500 kb (+/-) of rs12330322,  
205 identified in Shungin et al (35). However, this previously-identified locus did not generalize to HCHS/SOL  
206 ( $r>0.05$ ); and may represent an independent association signal in a known region (i.e. all GIANT variants  
207 at this locus with  $P<1\times 10^{-6}$  exhibit  $r>0.05$  in HCHS/SOL and rs6809759 had a  $P>1\times 10^{-6}$  in Shungin et al.  
208 (35) [ $P=1.4\times 10^{-1}$ ]). A total of 40 regions generalized to HCHS/SOL for HIPadjBMI, including 29 for sexes-  
209 combined, three of which were significant for both women-only and sexes combined analyses  
210 (**Supplementary Table 11**).

211 Because some of the SNPs previously reported by GIANT may not have generalized due to lack  
212 of power in HCHS/SOL, we calculated individual-level genetic scores based on trait-increasing alleles for  
213 each central adiposity phenotype (**Supplementary Table 12**) and sex stratum (three association tests per  
214 phenotype). For genetic scores based on SNPs with  $p\text{-value}<1\times 10^{-7}$  in GIANT, all association tests were  
215 significant ( $p\text{-value}<0.05$ ). For genetic scores calculated from GIANT SNPs with  $1\times 10^{-7}<P<1\times 10^{-6}$ , six of  
216 the nine association tests were significant. Given that only three out of 27 analyses had a  $p\text{-value}>0.05$ ,  
217 there is considerable overlap in the association results of Hispanics/Latinos to those previously reported  
218 in the GIANT multiethnic analysis.

219

## 220 **Biological Curation**

221 We examined the four SNPs (i.e. rs13301996, rs79478137, rs28692724, and rs3168072) in novel  
222 loci identified in the replication analyses (**Table 1**) for association with other phenotypes, gene  
223 expression, and metabolites in publicly available data using Phenoscanner (37, 38), and assessed the

224 potential regulatory role of these variants and those in LD using publicly available databases, including  
225 RegulomeDB (39), Haploreg (40), UCSC GenomeBrowser (41), and GTex (42). Known associations with  
226 these variants meeting Bonferroni-corrected significance after correcting for number of reported  
227 associations in Phenoscanner for the four variants within each category ( $P < 0.05/7631 = 6.55 \times 10^{-5}$  for  
228 GWAS;  $P < 0.05/88 = 5.68 \times 10^{-4}$  for gene expression;  $P < 0.05/488 = P < 1.02 \times 10^{-4}$  for metabolites) are provided  
229 in **Supplementary Tables 13-15**.

230 WHRadjBMI-associated variant, rs13301996, which is intronic to *CDK5RAP2* (CDK5 [cyclin-  
231 dependent kinase 5] Regulatory Subunit Associated Protein 2), was significantly associated with  
232 expression of 15 genes and one lncRNA across 17 tissue types (**Supplementary Table 14**). The most  
233 significant of these associations was with *MEGF9* (Multiple Epidermal Growth Factor-Like Domains 9) in  
234 whole blood ( $P = 1.8 \times 10^{-149}$ ), a gene that rests 30 Kb upstream of rs1330996. This SNP is also significantly  
235 associated with expression of *MEGF9* in subcutaneous adipose tissue, sun-exposed skin, and T-cells.  
236 Additionally, our lead variant in *CDK5RAP2* is associated with expression of *MEGF9* in whole blood and  
237 the testis; and with expression of *PSMD5* (proteasome [prosome, macropain] 26S subunit, non-ATPase,  
238 5) and/or *PSMD5-AS1* in several relevant tissues, including whole blood, tibial artery, tibial nerve, lung,  
239 thyroid, esophagus muscle, skeletal muscle, liver, cerebellum, and subcutaneous adipose tissues, among  
240 others. Although rs13301996 is associated with gene expression for several genes, there is additional  
241 support for a regulatory role of this SNP and those with which it is in high LD ( $r^2 > 0.8$ ). For example, our  
242 lead SNP lies just outside of a DNase hypersensitivity cluster, lies within a region with evidence of histone  
243 modification in nine tissues including brain, skin, muscle, and heart; and likely falls in a transcription  
244 factor binding site active in skeletal and lung tissue; etc. (**Supplementary Table 16**) (39-41). While there  
245 are multiple lines of evidence for a regulatory role of this variant and multiple genes, rs13301996 has  
246 RegulomeDB Score of 6, indicating little evidence of binding.

247 WHRadjBMI-associated SNP, rs79478137, is a low frequency variant (MAF=1.6%) intronic in  
248 *SLC22A18AS* (Solute Carrier Family 22 (Organic Cation Transporter), Member 18 Antisense). This region  
249 is subject to genomic imprinting (43) which has been linked with Beckwith-Wiedemann syndrome, a  
250 disease caused by increased rate of growth in children (44-46). Our lead variant is associated with two  
251 Electronic Health Record (EHR)-derived phenotypes (cause of death: multisystem degeneration; and  
252 cause of death: tongue, unspecified) (**Supplementary Table 13**) in Phenoscanner. There is limited  
253 evidence of a regulatory role for our lead SNP (RegulomeDB Score = 4), but rs79478137 is in perfect LD  
254 with several variants with evidence of regulation (histone modification, open chromatin, DNase  
255 hypersensitivity, transcription factor binding) in more than 50 tissues, including blood, pancreas, liver,  
256 and skeletal muscle, and hippocampal tissues, etc. (**Supplementary Table 16**) (39-41).

257 Our lead SNP associated with HIPadjBMI in women, rs28692724 (NC\_000014.9:g.77027445C>T),  
258 is a synonymous variant exonic to *IRF2BPL* (interferon regulatory factor 2 binding protein like) that is  
259 significantly associated with expression of the same gene in whole blood (**Supplementary Table 14**).  
260 Additionally, this variant lies in a known CTCF binding site (RegulomDB Score = 2b), among other  
261 transcription factors, and a DNase Hypersensitivity cluster (**Supplementary Table 16**) (39-41).

262 WCadjBMI-associated SNP, rs3168072, was significantly associated with existing GWAS traits  
263 present in Phenoscanner, including “cause of death: other specified respiratory disorders”  
264 (**Supplementary Table 13**). Additionally, rs3168072 is significantly associated with expression of several  
265 genes in whole blood, but most significantly associated with expression of *TMEM258* (Transmembrane  
266 Protein 258) (**Supplementary Table 14**). Rs3168072 is ~95 Kb upstream of *TMEM258*. Our lead variant is  
267 likely to play a role in gene expression regulation (RegulomeDB score= 2b, “likely to affect binding”) (39).  
268 Additionally, our lead variant and those in high LD ( $R^2>0.8$ ) lie within known DNase hypersensitivity  
269 regions and within active areas of histone modification, open chromatin, and likely gene enhancer  
270 regions (**Supplementary Table 16**) (39-41). Our lead SNP associated with WCadjBMI, rs3168072, is

271 significantly associated with five lipid-related metabolites (**Supplementary Table 15**), including “Other  
272 polyunsaturated fatty acids than 18:2,” “CH2 groups in fatty acids,” “Ratio of bis allylic bonds to double  
273 bonds in lipids,” “CH2 groups to double bonds ratio,” and “Ratio of bis allylic bonds to total fatty acids in  
274 lipids.”

275

## 276 **Discussion**

277 We performed the first large-scale GWAS of 3 central adiposity traits (i.e., WHRadjBMI,  
278 WCadjBMI, and HIPadjBMI) in a sample of approximately 12,672 Hispanic/Latino individuals. We  
279 identified 16 variants that were suggestively associated ( $P < 1 \times 10^{-6}$ ) with WHRadjBMI, 22 for WCadjBMI,  
280 and 28 for HIPadjBMI. Of these 66 variants that were suggestively associated with the three central  
281 adiposity traits, four novel loci replicated after meta-analysis with replication samples. Additionally, we  
282 demonstrated that eight previously identified GWAS loci generalized to Hispanic/Latino study  
283 participants for WHRadjBMI, 10 for WCadjBMI, and 12 for HIPadjBMI in HCHS/SOL.

284

### 285 **Discovery of Four Novel Loci**

286 Given the large number of published GWAS on central adiposity measures, it may seem  
287 surprising that four novel loci (rs13301996, rs79478137, rs28692724, and rs3168072) were mapped. We  
288 ascribe this to (1) previous GWAS were primarily conducted in European populations. Indeed, all four  
289 novel SNPs were absent from previous GIANT HapMap imputed analyses (35), and one (rs28692724) of  
290 the four absent from a more recent GWAS that included Europeans from the UK Biobank (33); (2) the  
291 consideration of a broad spectrum of ancestrally diverse Hispanic/Latino populations, including not just  
292 those of Mexican ancestry, but also those with ancestry from the Caribbean, Central, and/or South  
293 America (47); (3) the use of the entire 1,000 Genomes Phase I Reference panel, including populations  
294 with Native American ancestry: MXL (Mexico), CLM (Colombia), and PUR (Puerto Rico); (4)

295 demonstrated differences in the patterning of body composition by ancestry (48, 49). More specifically,  
296 African ancestry populations have lower body fat percentages than men and women of non-Hispanic  
297 European, Native American, and East Asian ancestry at the same BMI. Additionally, non-Hispanic African  
298 ancestry men and women have greater skeletal and muscle mass than their non-Hispanic European  
299 ancestry counterparts, who in turn have greater skeletal and muscle mass than men and women of East  
300 Asian origin (48, 50-52)

301           Recent GWAS for coding variation of waist circumference traits identified the importance of  
302 central adiposity genes in lipid regulation, storage, and homeostasis (53). Similarly, we found a novel  
303 association of a variant in *FADS2* (rs3168072) with WC<sub>adjBMI</sub> following meta-analysis of HCHS/SOL  
304 results with results from an independent sample of European descent individuals, which further implies  
305 a role of this locus in central adiposity and lipid homeostasis. Genetic variations in the *FADS2* gene has  
306 been associated with several traits related to obesity and cardiometabolic health, including fatty acid  
307 metabolism and adipose tissue inflammation, leading to an interaction between weight loss and *FADS2*  
308 genes in the regulation of adipose tissue inflammation (54). A nearby variant, rs174546 ( $R^2=0.3523$ ,  
309  $D'=0.916$  in AMR), in *FADS1* has previously been associated with four lipid traits (55). The A allele  
310 (MAF=38%) is associated with greater waist circumference in our samples, and is nearly fixed among  
311 sub-Saharan African populations (99% in 1000 Genomes AFR), at very high frequency in European  
312 populations (97% in EUR), and at a lower frequency in East Asian (75% in EAS) and Native American  
313 populations (63% in AMR). Rs3168072 is intronic to *FADS2* - a member of the fatty acid desaturase  
314 (FADS) gene family and is involved in the endogenous conversion of short-chain polyunsaturated fatty  
315 acids to long chain fatty acids. The *FADS* cluster of genes appears to have been under strong selection in  
316 several human populations, which likely explains the large differences in allele frequencies across global  
317 populations (56-59), and why previous GWAS of waist traits primarily focused on European descent  
318 populations did not detect an association signal in this region.

319 We identified a novel association for WHRadjBMI with rs13301996 following meta-analysis with  
320 an independent sample of African descent individuals. Rs13301996 is intronic to *CDK5RAP2*, which  
321 encodes a regulator of CDK5 (cyclin-dependent kinase 5) activity (60), interacts with CDK5R1 and  
322 pericentrin (PCNT) (60), plays a role in centriole engagement and microtubule nucleation (61), and has  
323 been linked to primary microcephaly and Alzheimer's disease (62, 63). In addition, we identified a novel  
324 association for WHRadjBMI with rs79478137 (p-value=  $3.64E^{-9}$ ) in Hispanic/Latino women. Rs79478137  
325 is intronic to the antisense *SLC22A18AS* gene, which is highly expressed in the liver and kidney, as well as  
326 the gastrointestinal tract and placenta. Very little is known of the biological role of this gene (64), and  
327 *SLC22A18AS* has no counterpart in mice or other rodents (65). Thus, although its genomic organization is  
328 known, the regulation and function of this gene is not understood (66).

329 Lastly, we identified a novel association for HIPadjBMI at rs28692724 following meta-analysis  
330 with an independent sample of European women. Rs28692724 is a synonymous variant in *IRF2BPL*,  
331 which encodes a transcription factor that, acting within the neuroendocrine system, plays a role in  
332 regulating female reproductive function (67).

333

### 334 **Differences in Association by Background Group**

335 Many of the loci mapped in this study displayed effect heterogeneity by background group. For  
336 example, the *NTM* locus associated with WHRadjBMI in women, displayed nearly threefold the effect  
337 size in the mainland background group compared to the Caribbean background group. Also, for the  
338 women-only primary analysis, rs77186623 in the *LOC105375745* locus displayed a fourfold greater  
339 effect in the Caribbean background group compared to the mainland group. These and other loci  
340 displaying heterogeneity by background group (i.e. *MARCKSL1*, *C19orf67*, *RIT2*, *MAP4K4*, *COBL*, *NREP*,  
341 and *ANO10*) were not validated in replication analyses, possibly due in part to heterogeneity by  
342 background group.

343

## 344 **Limitations**

345           A limitation of this study was the small sample size within each HCHS/SOL background group.  
346       However, the use of genetic-analysis groups in our analyses accounted for heterogeneity of genetic  
347       effects among ethnic groups often ignored in GWAS studies. Compared to self-identified background  
348       groups, genetic-analysis groups are more genetically homogeneous and lack principal component  
349       outliers in stratified analysis, which may hinder detection of and adjustment for important population  
350       structure when ignored (68). In addition, genetic-analysis groups allow all individuals to be classified in a  
351       specific group, whereas many individuals in HCHS/SOL have a missing or non-specific self-identified  
352       background (68). Therefore, by using genetic-analysis groups in our analysis rather than self-identified  
353       background groups, we have increased our study's power to detect novel and previously documented  
354       associations with central adiposity traits (68). Due to the diverse background of our discovery  
355       population, another limitation was the lack of an ideal replication study. We attempted to overcome this  
356       limitation by focusing on both multiethnic meta-analyses, which would validate those associations that  
357       generalize across ancestries, and meta-analyses stratified by ancestry, which may allow for validation of  
358       more population-specific associations. However, it is possible that the limited Native American ancestry  
359       present across our replication cohorts may have hindered replication, and further analyses in more  
360       diverse Hispanic/Latino populations are needed to confirm the relevance of promising central adiposity  
361       associated loci identified in our study.

362

## 363 **Conclusion**

364

365           We identified 4 novel loci for central adiposity traits in a large population of Hispanic/Latino  
366       Americans. We also found that several previously identified central adiposity loci discovered in



367 European American populations generalized to Hispanic / Latino Americans. Many of the loci  
368 interrogated exhibit subgroup-specific effects, likely due to population history (admixture, natural  
369 selection), that have resulted in changes in LD, or allele frequency differences, or due to variation in  
370 etiology. These observations highlight the importance of large-scale genomic studies in ancestrally  
371 diverse populations for identifying obesity-susceptibility loci that generalize and those that are ancestry-  
372 specific.

373

## 374 **Materials and Methods**

375

### 376 **Study Sample**

377 Details on the study and sampling design of the Hispanic Community Health Study /Study of  
378 Latinos (HCHS/SOL) have been previously described (69). Briefly, HCHS/SOL is a community based  
379 prospective cohort study of 16,415 self-identified Hispanic/Latino adults aged 18-74 years at screening  
380 from randomly selected households in four US field centers (Chicago, IL; Miami, FL; Bronx, NY; San  
381 Diego, CA) with baseline examination (2008 to 2011) and yearly telephone follow-up assessment for at  
382 least three years. The HCHS/SOL cohort includes participants who self-identified as being Central  
383 American (n=1,732), Cuban (n=2,348), Dominican (n=1,473), Mexican (n=6,472), Puerto-Rican (n=2,728),  
384 and South American (n=1,072). The goals of the HCHS/SOL are to describe the prevalence of risk and  
385 protective factors for chronic conditions (e.g. cardiovascular disease (CVD), diabetes and pulmonary  
386 disease), and to quantify all-cause mortality, fatal and non-fatal CVD and pulmonary disease, and  
387 pulmonary disease exacerbation over time. The baseline clinical examination (70) included  
388 comprehensive biological (e.g., anthropometrics, blood draw, oral glucose tolerance test, ankle brachial  
389 pressure index, electrocardiogram), behavioral (e.g. dietary intake assessed with two 24-hour recalls,  
390 physical activity assessment by accelerometer and self-report, overnight sleep exam for apneic events,

391 tobacco and alcohol assessed by self-report), and socio-demographic (e.g., socioeconomic status,  
392 migration history) assessments. This study was approved by the institutional review boards at each field  
393 center, where all subjects gave written informed consent.

394 Participants in HCHS/SOL self-identified their background as Mexican, Central American, South  
395 American (mainland), Puerto Rican, Cuban, or Dominican (Caribbean). Some participants chose “more  
396 than one,” “other,” or chose not to self-identify. We addressed the missing or inconsistent data in self-  
397 identified background groups by defining “genetic analysis groups,” described in Conomos et al (68). To  
398 increase power in this analysis, we chose to stratify by the broader mainland or Caribbean categories  
399 rather than more specific groups. In this paper, we will use the term “background group” to refer to a  
400 super-group of genetic analysis groups by geographic region, mainland or Caribbean. Hispanics/Latinos  
401 have admixed ancestry from three continents: Africa, America, and Europe. In general, participants from  
402 the mainland group have higher proportions of American ancestry and lower African ancestry, while  
403 participants in the Caribbean group have higher proportions of African ancestry (68).

404

## 405 **Phenotypes**

406 All measurements were taken from the baseline visit. Participants were dressed in scrub suits or  
407 light non-constricting clothing and shoes were removed for weight and height measurements. WC and  
408 HIP were measured using Gulick II 150 and 250 cm anthropometric tape and rounded to the nearest  
409 centimeter (cm). Height was measured using a wall mounted stadiometer and rounded to the nearest  
410 cm, and weight measured with a Tanita Body Composition Analyzer, TBF-300A to the nearest tenth of a  
411 kilogram (kg). Height and weight were used to calculate BMI ( $\text{kg}/\text{m}^2$ ). We applied a log<sub>10</sub> transformation  
412 on HIP, due to its non-normal trait distribution.

413

## 414 **Genotyping**

415 Our analyses included 7,472 women and 5,200 men of mainland (Mexican, Central and South  
416 American) or Caribbean (Puerto Rican, Cuban, and Dominican) ancestry residing in the U.S. All  
417 participants were genotyped on the Illumina SOL Omni2.5M custom content array, which was  
418 subsequently used to impute millions of additional variants, based on the entire 1,000 Genomes Phase I  
419 Reference panel, including populations with Native American ancestry: MXL (Mexico), CLM (Colombia),  
420 and PUR (Puerto Rico). Pre-phasing was performed using SHAPEIT, followed by imputation with  
421 IMPUTE2 (71, 72).

422

### 423 **Discovery Analyses**

424 Due to known differences in genetic effects on waist and hip traits between men and women  
425 (35, 73, 74), we analyzed associations stratified by sex for each trait, in addition to the entire sample.  
426 We used linear mixed-model regression, assuming an additive genetic model adjusted for age, age<sup>2</sup>,  
427 study center, sample weights, genetic analysis subgroup (68, 75), principal components to account for  
428 ancestry, population structure using kinship coefficients and sample eigenvectors, household, census  
429 block group, and sex in the combined analysis. Kinship, household, and block group were treated as  
430 random effects in each model. Sample weights were incorporated in our models as a fixed effect to  
431 account for oversampling of the communities in the 45-74 age group (n=9,714, 59.2%) which was  
432 intended to facilitate the examination of HCHS/SOL target outcomes. HCHS/SOL sampling weights are  
433 the product of a “base weight” (reciprocal of the probability of selection) and three adjustments: 1) non-  
434 response adjustments made relative to the sampling frame, 2) trimming to handle extreme values (to  
435 avoid a few weights with extreme values being overly influential in the analyses), and 3) calibration of  
436 weights to the 2010 U.S. Census according to age, sex, and Hispanic background. We used genetic-  
437 analysis groups in our analyses accounted for heterogeneity of genetic effects among ethnic groups.  
438 Compared to self-identified background groups, genetic-analysis groups are more genetically

439 homogeneous and lack principal component outliers in stratified analysis, which may hinder detection of  
440 and adjustment for important population structure when ignored (68). In addition, genetic-analysis  
441 groups allow all individuals to be classified in a specific group, whereas many individuals in HCHS/SOL  
442 have a missing or non-specific self-identified background (68). Also, we conducted stratified analyses by  
443 region (mainland vs. Caribbean) to identify potential heterogeneity in effect by background group. We  
444 examined heterogeneity across background group using  $I^2$  statistics calculated using METAL (76) and  
445 tested for significant interaction ( $P_{diff} < 0.05$ ) by background group using EasyStrata (77).

446 To decrease the number of spurious associations, we filtered all results on minor allele  
447 frequency (MAF)  $< 0.5\%$ , Hardy-Weinberg Equilibrium (HWE)  $P < 1 \times 10^{-7}$ , minor allele count (MAC  
448 [effective N])  $< 30$  (68). Additionally, we categorized suggestive loci as those with variants reaching  
449  $P < 1 \times 10^{-6}$  and with at least one additional variant within 500 kb+/- with a  $P < 1 \times 10^{-5}$ . We used regional  
450 association plots produced in LocusZoom to visualize association regions using 1000 Genomes Admixed  
451 American (AMR) reference population for LD (<http://locuszoom.sph.umich.edu/>).

452

### 453 **Local Ancestry Estimation**

454 We estimated local ancestry (African, Native American, and European) using RFMix (78), which  
455 applies a conditional-random-field-based approach for estimation, to inform differences by background  
456 group. We used 236,456 genotyped SNPs available in both HCHS/SOL and reference-panel datasets in  
457 the Human Genome Diversity Project (HGDP) (79), HapMap 3 (80), and 1000 Genomes phase 1 for  
458 detecting African, Native American, and European ancestry. We used BEAGLE (v.4) to phase and impute  
459 sporadic missing genotypes in the HCHS/SOL and reference-panel datasets (81).

460

### 461 **Replication and Meta-Analyses**

462 An aim of our study was to identify genetic variants that contribute to central adiposity which  
463 may vary by ancestry; therefore, we sought to replicate our association findings using 1000 Genomes  
464 imputed GWAS data available in independent cohorts including eight studies with Hispanics/Latinos (HL:  
465 N up to 12,341), three studies with African-Americans (AA; N up to 12,496), and one study with  
466 European-Americans (EUR: N up to 8,845). Study design and descriptive statistics for each replication  
467 study are provided in **Supplementary Table 1**. Each replication study excluded individuals that were  
468 pregnant or exhibited extreme values for waist or hip measures (outside of  $\pm 4$  SD from the mean). Each  
469 study used measures from a single visit with the greatest sample size. We used linear regression (or  
470 linear mixed effects models if the study had related individuals) association analyses on the trait  
471 residuals after adjustment for age, age<sup>2</sup>, principal components to account for ancestry, BMI, other study  
472 specific factors (e.g. study center), and sex in the sex combined analysis, stratified by race/ethnicity  
473 where applicable for each SNP that reached suggestive significance ( $P < 1 \times 10^{-6}$ ) in the discovery analysis.

474 We employed a fixed-effects meta-analysis using the inverse variance-weighted method for  
475 WHRadjBMI and WCadjBMI. For HIPadjBMI, due to trait transformations, we used sample size weighted  
476 meta-analysis. All meta-analyses were implemented in METAL (82). We conducted meta-analyses  
477 stratified by race/ethnicity group and combined across groups. We included SNPs with a study and  
478 stratum specific imputation quality (Rsq) greater than 0.4, Hardy-Weinberg Equilibrium P-value greater  
479 than  $1 \times 10^{-7}$ , and a minor allele count (MAC) greater than five. To declare statistical significance for  
480 replicated loci, we required in each replication sample a trait and stratum-specific  $P < 0.05$  with a  
481 consistent direction of effect with discovery, and genome-wide significance ( $P < 5 \times 10^{-8}$ ) when meta-  
482 analyzed together with HCHS/SOL.

483

484 **Generalization**

485 To examine whether previously reported association regions generalized to the HCHS/SOL, we  
486 downloaded the publicly available multi-ethnic (European, Asian, and African ancestry) GWAS results  
487 from the Genetic Investigation of Anthropometric Traits (GIANT) consortium (14) for HIPadjBMI,  
488 WHRadjBMI, and WCadjBMI  
489 ([https://portals.broadinstitute.org/collaboration/giant/index.php/GIANT\\_consortium\\_data\\_files#GIANT](https://portals.broadinstitute.org/collaboration/giant/index.php/GIANT_consortium_data_files#GIANT)  
490 [\\_consortium\\_2012-2015\\_GWAS\\_Metadata\\_is\\_Available\\_Here\\_for\\_Download](https://portals.broadinstitute.org/collaboration/giant/index.php/GIANT_consortium_data_files#GIANT)), in men, women, and  
491 sexes combined, and applied the framework of Sofer et al. (2016) for generalization testing (83). We  
492 took all variant associations with  $P < 1 \times 10^{-6}$  in GIANT and identified the matching association test in  
493 HCHS/SOL. For each such association, we calculated a directional FDR  $r$ -value, by combining the  $P$ -values  
494 from GIANT and HCHS/SOL, while accounting for multiple testing and for the direction of estimated  
495 associations in each of the studies. Then, an association was declared as generalized, while controlling  
496 for the False Discovery Rate (FDR) at the 0.05 level, if its  $r$ -value was smaller than 0.05. Note that  
497 multiple SNPs from the same region were tested. Therefore, in an iterative procedure, we pruned the  
498 results list by identifying the SNP with the lowest  $r$ -value in an analysis, then finding all SNPs in a 1MB  
499 region around it and removing them from the list. Thus, the number of generalized regions is the  
500 number of generalized SNPs in the pruned list.

501 We also hypothesized that some regions did not generalize due to lack of power (the HCHS/SOL  
502 sample size is much smaller than the GIANT sample size). To test this, we took all tested SNPs from the  
503 non-generalized regions and considered the GIANT multi-ethnic GWAS results. In an iterative procedure,  
504 we pruned the list by first identifying the SNP with lowest GIANT  $P$ -value in the analysis, then found all  
505 SNPs in a 1MB region around it and removed them from the list. We repeated until no SNPs remained.  
506 All the SNPs in the pruned list were selected solely based on their GIANT  $P$ -values. Since there were  
507 many such variants, we further grouped them according to their  $P$ -values. Groups were formed by trait,  
508 sex (men, women, combined), and GIANT  $P$ -value (between  $10^{-6}$  to  $10^{-7}$ , between  $10^{-7}$  to  $10^{-8}$ , and

509 smaller than  $10^{-8}$ ). For each such group of SNPs, we created a genetic risk score (GRS) in HCHS/SOL. For  
510 each sex stratum and each group of SNPs, the value of the GRS was the sum of all trait increasing alleles  
511 in that group. We tested the GRS in the appropriate analysis group (men, women, combined). A low *P*-  
512 value implies that some of the SNPs in the group are likely associated with the trait in HCHS/SOL.

513

## 514 **Biological Curation**

515 To gain further insight into the possible functional role of the identified variants and to assess  
516 the relevance of our identified variants with other phenotypes, we conducted lookups of our replicated  
517 variants in multiple publicly available databases, including PhenoScanner (37), RegulomeDB (39),  
518 Haploreg (40), and UCSC GenomeBrowser (41). Additionally, we conducted lookups of nearby genes in  
519 GTex (42). The R package HaploR was used to query HaploReg and RegulomeDB ([https://cran.r-](https://cran.r-project.org/web/packages/haploR/vignettes/haplor-vignette.html)  
520 [project.org/web/packages/haploR/vignettes/haplor-vignette.html](https://cran.r-project.org/web/packages/haploR/vignettes/haplor-vignette.html)).

521

## 522 **Acknowledgements**

523 AEJ was supported in part by National Institute of Health (NIH), National Heart, Lung, and Blood  
524 Institutes (NHLBI) grant K99/R00 HL 130580 and American Heart Association (AHA) grant  
525 13POST16500011. YCK is supported by the National Heart, Lung, and Blood Institutes (R01-HL136528).  
526 HMM was supported in part by NIH NHLBI grant T32 HL007055.

527 **HCHS/SOL:** The authors thank the staff and participants of HCHS/SOL for their important contributions.  
528 (Investigators website - <http://www.csc.unc.edu/hchs/>). The Hispanic Community Health Study/Study  
529 of Latinos is a collaborative study supported by contracts from the National Heart, Lung, and Blood  
530 Institute (NHLBI) to the University of North Carolina (HHSN268201300001I / N01-HC-65233), University  
531 of Miami (HHSN268201300004I / N01-HC-65234), Albert Einstein College of Medicine  
532 (HHSN268201300002I / N01-HC-65235), University of Illinois at Chicago – HHSN268201300003I / N01-

533 HC-65236 Northwestern Univ), and San Diego State University (HHSN268201300005I / N01-HC-65237).

534 The following Institutes/Centers/Offices have contributed to the HCHS/SOL through a transfer of funds

535 to the NHLBI: National Institute on Minority Health and Health Disparities, National Institute on

536 Deafness and Other Communication Disorders, National Institute of Dental and Craniofacial Research,

537 National Institute of Diabetes and Digestive and Kidney Diseases, National Institute of Neurological

538 Disorders and Stroke, NIH Institution-Office of Dietary Supplements. The Genetic Analysis Center at the

539 University of Washington was supported by NHLBI and NIDCR contracts (HHSN268201300005C AM03

540 and MOD03).

541 **ARIC:** The Atherosclerosis Risk in Communities Study has been funded in whole or in part with Federal

542 funds from the National Heart, Lung, and Blood Institute, National Institutes of Health, Department of

543 Health and Human Services (contract numbers HHSN268201700001I, HHSN268201700002I,

544 HHSN268201700003I, HHSN268201700004I and HHSN268201700005I), R01HL087641, R01HL059367

545 and R01HL086694; National Human Genome Research Institute contract U01HG004402; and National

546 Institutes of Health contract HHSN268200625226C. Infrastructure was partly supported by Grant

547 Number UL1RR025005, a component of the National Institutes of Health and NIH Roadmap for Medical

548 Research. The authors thank the staff and participants of the ARIC study for their important

549 contributions.

550 **GUARDIAN, MACAD, HTN-IR, GOLDR:** This research was supported by the GUARDIAN (Genetics

551 Underlying Diabetes in Hispanics) Study, National Institute of Diabetes and Digestive and Kidney

552 Diseases (NIDDK) contract DK085175; (Mexican-American Coronary Artery Disease (MACAD) National

553 Heart, Lung, and Blood Institute, contracts R01-HL088457, R01-HL-60030; National Heart, Lung, and

554 Blood Institute, Hypertension and Insulin Resistance (HTN-IR) contracts R01-HL067974, R01-HL-55005,

555 R01-HL 067974; National Institutes of Health, Genetics of Latino Diabetic Retinopathy (GOLDR) contract

556 EY014684.



557 **MESA:** MESA and the MESA SHARe projects are conducted and supported by the National Heart, Lung,  
558 and Blood Institute (NHLBI) in collaboration with MESA investigators. Support for MESA is provided by  
559 contracts 75N92020D00001, HHSN268201500003I, N01-HC-95159, 75N92020D00005, N01-HC-95160,  
560 75N92020D00002, N01-HC-95161, 75N92020D00003, N01-HC-95162, 75N92020D00006, N01-HC-95163,  
561 75N92020D00004, N01-HC-95164, 75N92020D00007, N01-HC-95165, N01-HC-95166, N01-HC-95167,  
562 N01-HC-95168, N01-HC-95169, UL1-TR-000040, UL1-TR-001079, and UL1-TR-001420. Also supported by  
563 the National Center for Advancing Translational Sciences, CTSI grant UL1TR001881, and the National  
564 Institute of Diabetes and Digestive and Kidney Disease Diabetes Research Center (DRC) grant DK063491  
565 to the Southern California Diabetes Endocrinology Research Center.

566 **The Mexico City 1 and Mexico City 2** studies were supported in Mexico by the Fondo Sectorial de  
567 Investigación en Salud y Seguridad Social (SSA/IMSS/ISSSTECONACYT, project 150352), Temas  
568 Prioritarios de Salud Instituto Mexicano del Seguro Social (2014-FIS/IMSS/PROT/PRI0/14/34), and the  
569 Fundación IMSS. We thank Miguel Alexander Vazquez Moreno, Daniel Locia and Araceli Méndez Padrón  
570 for technical support in Mexico. In Canada, this research was enabled in part by two CIHR Operating  
571 grants to EJP, a CIHR New Investigator Award to EJP and by support provided by Compute Ontario  
572 ([www.computeontario.ca](http://www.computeontario.ca)), and Compute Canada ([www.compute.canada.ca](http://www.compute.canada.ca)).

573 **WHI:** Funding support for the “Epidemiology of putative genetic variants: The Women’s Health  
574 Initiative” study is provided through the NHGRI grants HG006292 and HL129132. The WHI program is  
575 funded by the National Heart, Lung, and Blood Institute, National Institutes of Health, U.S. Department  
576 of Health and Human Services through contracts HHSN268201100046C, HHSN268201100001C,  
577 HHSN268201100002C, HHSN268201100003C, HHSN268201100004C, and HHSC271201100004C. The  
578 authors thank the WHI investigators and staff for their dedication, and the study participants for making  
579 the program possible. A full listing of WHI investigators can be found at:  
580 [http://www.whiscience.org/publications/WHI\\_investigators\\_shortlist.pdf](http://www.whiscience.org/publications/WHI_investigators_shortlist.pdf).

581

## 582 **Data Availability Statement**

583 Raw genetic data used in the discovery analysis for this project is available through request on dbGAP  
584 (dbGaP Study Accession: phs000810.v1.p1). Additionally, the full GWAS summary results for common  
585 variants with a MAF>1% will be made available upon request to the author and on the NHGRI-GWAS  
586 Catalog (upon publication).

587

## 588 **Conflict of Interest Statement**

589 The authors have no conflicts of interest to disclose.

590

## 591 **References**

592

593 1 Flegal, K.M., Carroll, M.D., Kit, B.K. and Ogden, C.L. (2012) Prevalence of Obesity and Trends in  
594 the Distribution of Body Mass Index Among US Adults, 1999-2010. *JAMA: The Journal of the American*  
595 *Medical Association*, **307**, 491-497.

596 2 Ogden, C.L., Carroll, M.D., Curtin, L.R., McDowell, M.A., Tabak, C.J. and Flegal, K.M. (2006)  
597 Prevalence of overweight and obesity in the United States, 1999-2004. *JAMA*, **295**, 1549-1555.

598 3 Stevens, G.A., Singh, G.M., Lu, Y., Danaei, G., Lin, J.K., Finucane, M.M., Bahalim, A.N., McIntire,  
599 R.K., Gutierrez, H.R., Cowan, M. *et al.* (2012) National, regional, and global trends in adult overweight  
600 and obesity prevalences. *Population health metrics*, **10**, 22.

601 4 Finucane, M.M., Stevens, G.A., Cowan, M.J., Danaei, G., Lin, J.K., Paciorek, C.J., Singh, G.M.,  
602 Gutierrez, H.R., Lu, Y., Bahalim, A.N. *et al.* (2011) National, regional, and global trends in body-mass

603 index since 1980: systematic analysis of health examination surveys and epidemiological studies with  
604 960 country-years and 9.1 million participants. *Lancet*, **377**, 557-567.

605 5 Hales, C.M., Carroll, M.D., Fryar, C.D. and Ogden, C.L. (2017) Prevalence of Obesity Among  
606 Adults and Youth: United States, 2015-2016. *NCHS Data Brief*, in press., 1-8.

607 6 Elks, C.E., den Hoed, M., Zhao, J.H., Sharp, S.J., Wareham, N.J., Loos, R.J. and Ong, K.K. (2012)  
608 Variability in the heritability of body mass index: a systematic review and meta-regression. *Frontiers in*  
609 *endocrinology*, **3**, 29.

610 7 Norden-Krichmar, T.M., Gizer, I.R., Libiger, O., Wilhelmsen, K.C., Ehlers, C.L. and Schork, N.J.  
611 (2014) Correlation analysis of genetic admixture and social identification with body mass index in a  
612 Native American community. *American journal of human biology : the official journal of the Human*  
613 *Biology Council*, **26**, 347-360.

614 8 Ravussin, E., Valencia, M.E., Esparza, J., Bennett, P.H. and Schulz, O. (1994) Effects of a  
615 traditional lifestyle on obesity in Pima Indians. *Diabetes Care*, **17** 1067-1074.

616 9 Bogardus, C., Lillioja, S., Ravussin, E., Abbott, W.G., Zawadzki, J.K., Young, A., Knowler, W.C.,  
617 Jacobowitz, R. and Moll, P.P. (1986) Familial dependence of the resting metabolic rate. *New England*  
618 *Journal of Medicine*, **315**, 96-100.

619 10 Knowler, W.C., Pettitt, D.J., Saad, M.F., Charles, M.A., Nelson, R.G., Howard, B.V., Bogardus, C.  
620 and Bennett, P.H. (1991) Obesity in the Pima Indians: its magnitude and relationship with diabetes.  
621 *American Journal of Clinical Nutrition*, **53**, 1543S-1551S.

622 11 Abate, N. and Chandalia, M. (2007) Ethnicity, type 2 diabetes & migrant Asian Indians. *The*  
623 *Indian journal of medical research*, **125**, 251-258.

624 12 Nassir, R., Qi, L., Kosoy, R., Garcia, L., Allison, M., Ochs-Balcom, H.M., Tylavsky, F., Manson, J.E.,  
625 Shigeta, R., Robbins, J. *et al.* (2012) Relationship between adiposity and admixture in African-American  
626 and Hispanic-American women. *Int J Obes (Lond)*, **36**, 304-313.

- 627 13 Locke, A.E., Kahali, B., Berndt, S.I., Justice, A.E., Pers, T.H., Day, F.R., Powell, C., Vedantam, S.,  
628 Buchkovich, M.L., Yang, J. *et al.* (2015) Genetic studies of body mass index yield new insights for obesity  
629 biology. *Nature*, **518**, 197-206.
- 630 14 Shungin, D., Winkler, T.W., Croteau-Chonka, D.C., Ferreira, T., Locke, A.E., Magi, R., Strawbridge,  
631 R.J., Pers, T.H., Fischer, K., Justice, A.E. *et al.* (2015) New genetic loci link adipose and insulin biology to  
632 body fat distribution. *Nature*, **518**, 187-196.
- 633 15 Justice, A.E., Winkler, T.W., Feitosa, M.F., Graff, M., Fisher, V.A., Young, K., Barata, L., Deng, X.,  
634 Czajkowski, J., Hadley, D. *et al.* (2017) Genome-wide meta-analysis of 241,258 adults accounting for  
635 smoking behaviour identifies novel loci for obesity traits. *Nature communications*, **8**, 14977.
- 636 16 Ng, M.C.Y., Graff, M., Lu, Y., Justice, A.E., Mudgal, P., Liu, C.T., Young, K., Yanek, L.R., Feitosa,  
637 M.F., Wojczynski, M.K. *et al.* (2017) Discovery and fine-mapping of adiposity loci using high density  
638 imputation of genome-wide association studies in individuals of African ancestry: African Ancestry  
639 Anthropometry Genetics Consortium. *PLoS genetics*, **13**, e1006719.
- 640 17 Graff, M., Scott, R.A., Justice, A.E., Young, K.L., Feitosa, M.F., Barata, L., Winkler, T.W., Chu, A.Y.,  
641 Mahajan, A., Hadley, D. *et al.* (2017) Genome-wide physical activity interactions in adiposity - A meta-  
642 analysis of 200,452 adults. *PLoS genetics*, **13**, e1006528.
- 643 18 Berndt, S.I., Gustafsson, S., Magi, R., Ganna, A., Wheeler, E., Feitosa, M.F., Justice, A.E., Monda,  
644 K.L., Croteau-Chonka, D.C., Day, F.R. *et al.* (2013) Genome-wide meta-analysis identifies 11 new loci for  
645 anthropometric traits and provides insights into genetic architecture. *Nat Genet*, **45**, 501-512.
- 646 19 Wen, W., Cho, Y.S., Zheng, W., Dorajoo, R., Kato, N., Qi, L., Chen, C.H., Delahanty, R.J., Okada, Y.,  
647 Tabara, Y. *et al.* (2012) Meta-analysis identifies common variants associated with body mass index in  
648 east Asians. *Nat Genet*, **44**, 307-311.

649 20 Cho, Y.S., Go, M.J., Kim, Y.J., Heo, J.Y., Oh, J.H., Ban, H.J., Yoon, D., Lee, M.H., Kim, D.J., Park, M.  
650 *et al.* (2009) A large-scale genome-wide association study of Asian populations uncovers genetic factors  
651 influencing eight quantitative traits. *Nat Genet*, **41**, 527-534.

652 21 Monda, K.L., Chen, G.K., Taylor, K.C., Palmer, C., Edwards, T.L., Lange, L.A., Ng, M.C., Adeyemo,  
653 A.A., Allison, M.A., Bielak, L.F. *et al.* (2013) A meta-analysis identifies new loci associated with body mass  
654 index in individuals of African ancestry. *Nat Genet*, in press.

655 22 Folsom, A.R., Kushi, L.H., Anderson, K.E., Mink, P.J., Olson, J.E., Hong, C.P., Sellers, T.A., Lazovich,  
656 D. and Prineas, R.J. (2000) Associations of general and abdominal obesity with multiple health outcomes  
657 in older women: the Iowa Women's Health Study. *Archives of internal medicine*, **160**, 2117-2128.

658 23 Lavie, C.J., Milani, R.V. and Ventura, H.O. (2009) Obesity and cardiovascular disease: risk factor,  
659 paradox, and impact of weight loss. *Journal of the American College of Cardiology*, **53**, 1925-1932.

660 24 Huxley, R., Mendis, S., Zheleznyakov, E., Reddy, S. and Chan, J. (2010) Body mass index, waist  
661 circumference and waist:hip ratio as predictors of cardiovascular risk--a review of the literature.  
662 *European journal of clinical nutrition*, **64**, 16-22.

663 25 Zyriax, B.C., Schoeffauer, M., Klipstein-Grobusch, K., Boeing, H. and Windler, E. (2011)  
664 Differential association of anthropometric parameters with coronary risk in women--data of the CORA  
665 study. *Obesity facts*, **4**, 358-364.

666 26 Carey, V.J., Walters, E.E., Colditz, G.A., Solomon, C.G., Willett, W.C., Rosner, B.A., Speizer, F.E.  
667 and Manson, J.E. (1997) Body fat distribution and risk of non-insulin-dependent diabetes mellitus in  
668 women. The Nurses' Health Study. *American journal of epidemiology*, **145**, 614-619.

669 27 Wang, Y., Rimm, E.B., Stampfer, M.J., Willett, W.C. and Hu, F.B. (2005) Comparison of abdominal  
670 adiposity and overall obesity in predicting risk of type 2 diabetes among men. *Am J Clin Nutr*, **81**, 555-  
671 563.

- 672 28 Canoy, D. (2008) Distribution of body fat and risk of coronary heart disease in men and women.  
673 *Curr Opin Cardiol*, **23**, 591-598.
- 674 29 Snijder, M.B., Dekker, J.M., Visser, M., Yudkin, J.S., Stehouwer, C.D., Bouter, L.M., Heine, R.J.,  
675 Nijpels, G. and Seidell, J.C. (2003) Larger thigh and hip circumferences are associated with better glucose  
676 tolerance: the Hoorn study. *Obesity research*, **11**, 104-111.
- 677 30 Lango Allen, H., Estrada, K., Lettre, G., Berndt, S.I., Weedon, M.N., Rivadeneira, F., Willer, C.J.,  
678 Jackson, A.U., Vedantam, S., Raychaudhuri, S. *et al.* (2010) Hundreds of variants clustered in genomic  
679 loci and biological pathways affect human height. *Nature*, **467**, 832-838.
- 680 31 Fox, C.S., White, C.C., Lohman, K., Heard-Costa, N., Cohen, P., Zhang, Y., Johnson, A.D., Emilsson,  
681 V., Liu, C.T., Chen, Y.D. *et al.* (2012) Genome-wide association of pericardial fat identifies a unique locus  
682 for ectopic fat. *PLoS genetics*, **8**, e1002705.
- 683 32 Randall, J.C., Winkler, T.W., Kutalik, Z., Berndt, S.I. and *et al.* (2013) Sex-stratified genome-wide  
684 association studies including 270,000 individuals show sexual dimorphism in genetic loci for  
685 anthropometric traits. *PLoS genetics*, in press., Epub\_2013\_Jun\_2016.
- 686 33 Pulit, S.L., Stoneman, C., Morris, A.P., Wood, A.R., Glastonbury, C.A., Tyrrell, J., Yengo, L.,  
687 Ferreira, T., Marouli, E., Ji, Y. *et al.* (2019) Meta-analysis of genome-wide association studies for body fat  
688 distribution in 694 649 individuals of European ancestry. *Hum Mol Genet*, **28**, 166-174.
- 689 34 Tachmazidou, I., Suveges, D., Min, J.L., Ritchie, G.R.S., Steinberg, J., Walter, K., Iotchkova, V.,  
690 Schwartzenuber, J., Huang, J., Memari, Y. *et al.* (2017) Whole-Genome Sequencing Coupled to  
691 Imputation Discovers Genetic Signals for Anthropometric Traits. *Am J Hum Genet*, **100**, 865-884.
- 692 35 Shungin, D., Winkler, T.W., Croteau-Chonka, D.C., Ferreira, T., Locke, A.E., Magi, R., Strawbridge,  
693 R.J., Pers, T.H., Fischer, K., Justice, A.E. *et al.* (2015) New genetic loci link adipose and insulin biology to  
694 body fat distribution. *Nature*, **518**, 187-196.

- 695 36 Wen, W., Kato, N., Hwang, J.Y., Guo, X., Tabara, Y., Li, H., Dorajoo, R., Yang, X., Tsai, F.J., Li, S. *et*  
696 *al.* (2016) Genome-wide association studies in East Asians identify new loci for waist-hip ratio and waist  
697 circumference. *Sci Rep*, **6**, 17958.
- 698 37 Staley, J.R., Blackshaw, J., Kamat, M.A., Ellis, S., Surendran, P., Sun, B.B., Paul, D.S., Freitag, D.,  
699 Burgess, S., Danesh, J. *et al.* (2016) PhenoScanner: a database of human genotype-phenotype  
700 associations. *Bioinformatics (Oxford, England)*, **32**, 3207-3209.
- 701 38 Kamat, M.A., Blackshaw, J.A., Young, R., Surendran, P., Burgess, S., Danesh, J., Butterworth, A.S.  
702 and Staley, J.R. (2019) PhenoScanner V2: an expanded tool for searching human genotype-phenotype  
703 associations. *Bioinformatics (Oxford, England)*, **35**, 4851-4853.
- 704 39 Boyle, A.P., Hong, E.L., Hariharan, M., Cheng, Y., Schaub, M.A., Kasowski, M., Karczewski, K.J.,  
705 Park, J., Hitz, B.C., Weng, S. *et al.* (2012) Annotation of functional variation in personal genomes using  
706 RegulomeDB. *Genome Res*, **22**, 1790-1797.
- 707 40 Ward, L.D. and Kellis, M. (2016) HaploReg v4: systematic mining of putative causal variants, cell  
708 types, regulators and target genes for human complex traits and disease. *Nucleic Acids Res*, **44**, D877-  
709 881.
- 710 41 Kent, W.J., Sugnet, C.W., Furey, T.S., Roskin, K.M., Pringle, T.H., Zahler, A.M. and Haussler, D.  
711 (2002) The human genome browser at UCSC. *Genome Res*, **12**, 996-1006.
- 712 42 GTEx Consortium. (2013) The Genotype-Tissue Expression (GTEx) project. *Nat Genet*, **45**, 580-  
713 585.
- 714 43 Gallagher, E., Mc Goldrick, A., Chung, W.Y., Mc Cormack, O., Harrison, M., Kerin, M., Dervan,  
715 P.A. and Mc Cann, A. (2006) Gain of imprinting of SLC22A18 sense and antisense transcripts in human  
716 breast cancer. *Genomics*, **88**, 12-17.

717 44 Gardiner, K., Chitayat, D., Choufani, S., Shuman, C., Blaser, S., Terespolsky, D., Farrell, S., Reiss,  
718 R., Wodak, S., Pu, S. *et al.* (2012) Brain abnormalities in patients with Beckwith-Wiedemann syndrome.  
719 *Am J Med Genet A*, **158A**, 1388-1394.

720 45 Weksberg, R., Shuman, C., Caluseriu, O., Smith, A.C., Fei, Y.L., Nishikawa, J., Stockley, T.L., Best,  
721 L., Chitayat, D., Olney, A. *et al.* (2002) Discordant KCNQ1OT1 imprinting in sets of monozygotic twins  
722 discordant for Beckwith-Wiedemann syndrome. *Hum Mol Genet*, **11**, 1317-1325.

723 46 Brioude, F., Kalish, J.M., Mussa, A., Foster, A.C., Bliiek, J., Ferrero, G.B., Boonen, S.E., Cole, T.,  
724 Baker, R., Bertolotti, M. *et al.* (2018) Expert consensus document: Clinical and molecular diagnosis,  
725 screening and management of Beckwith-Wiedemann syndrome: an international consensus statement.  
726 *Nat Rev Endocrinol*, **14**, 229-249.

727 47 Abecasis, G.R., Auton, A., Brooks, L.D., DePristo, M.A., Durbin, R.M., Handsaker, R.E., Kang, H.M.,  
728 Marth, G.T. and McVean, G.A. (2012) An integrated map of genetic variation from 1,092 human  
729 genomes. *Nature*, **491**, 56-65.

730 48 Rao, G., Powell-Wiley, T.M., Ancheta, I., Hairston, K., Kirley, K., Lear, S.A., North, K.E.,  
731 Palaniappan, L. and Rosal, M.C. (2015) Identification of Obesity and Cardiovascular Risk in Ethnically and  
732 Racially Diverse Populations: A Scientific Statement From the American Heart Association. *Circulation*,  
733 **132**, 457-472.

734 49 Heymsfield, S.B., Peterson, C.M., Thomas, D.M., Heo, M. and Schuna, J.M., Jr. (2016) Why are  
735 there race/ethnic differences in adult body mass index-adiposity relationships? A quantitative critical  
736 review. *Obesity reviews : an official journal of the International Association for the Study of Obesity*, **17**,  
737 262-275.

738 50 Wagner, D.R. and Heyward, V.H. (2000) Measures of body composition in blacks and whites: a  
739 comparative review. *Am J Clin Nutr*, **71**, 1392-1402.



- 740 51 Rush, E.C., Goedecke, J.H., Jennings, C., Micklesfield, L., Dugas, L., Lambert, E.V. and Plank, L.D.  
741 (2007) BMI, fat and muscle differences in urban women of five ethnicities from two countries. *Int J Obes*  
742 (*Lond*), **31**, 1232-1239.
- 743 52 Hull, H.R., Thornton, J., Wang, J., Pierson, R.N., Jr., Kaleem, Z., Pi-Sunyer, X., Heymsfield, S., Albu,  
744 J., Fernandez, J.R., Vanitallie, T.B. *et al.* (2011) Fat-free mass index: changes and race/ethnic differences  
745 in adulthood. *Int J Obes (Lond)*, **35**, 121-127.
- 746 53 Justice, A.E., Karaderi, T., Highland, H.M., Young, K.L., Graff, M., Lu, Y., Turcot, V., Auer, P.L.,  
747 Fine, R.S., Guo, X. *et al.* (2019) Protein-coding variants implicate novel genes related to lipid homeostasis  
748 contributing to body-fat distribution. *Nat Genet*, **51**, 452-469.
- 749 54 Vaittinen, M., Walle, P., Kuosmanen, E., Mannisto, V., Kakela, P., Agren, J., Schwab, U. and  
750 Pihlajamaki, J. (2016) FADS2 genotype regulates delta-6 desaturase activity and inflammation in human  
751 adipose tissue. *Journal of lipid research*, **57**, 56-65.
- 752 55 Teslovich, T.M., Musunuru, K., Smith, A.V., Edmondson, A.C., Stylianou, I.M., Koseki, M.,  
753 Pirruccello, J.P., Ripatti, S., Chasman, D.I., Willer, C.J. *et al.* (2010) Biological, clinical and population  
754 relevance of 95 loci for blood lipids. *Nature*, **466**, 707-713.
- 755 56 Fumagalli, M., Moltke, I., Grarup, N., Racimo, F., Bjerregaard, P., Jorgensen, M.E., Korneliusen,  
756 T.S., Gerbault, P., Skotte, L., Linneberg, A. *et al.* (2015) Greenlandic Inuit show genetic signatures of diet  
757 and climate adaptation. *Science*, **349**, 1343-1347.
- 758 57 Mathieson, I., Lazaridis, I., Rohland, N., Mallick, S., Patterson, N., Roodenberg, S.A., Harney, E.,  
759 Stewardson, K., Fernandes, D., Novak, M. *et al.* (2015) Genome-wide patterns of selection in 230 ancient  
760 Eurasians. *Nature*, **528**, 499-503.
- 761 58 Mathias, R.A., Fu, W., Akey, J.M., Ainsworth, H.C., Torgerson, D.G., Ruczinski, I., Sergeant, S.,  
762 Barnes, K.C. and Chilton, F.H. (2012) Adaptive evolution of the FADS gene cluster within Africa. *PLoS*  
763 *One*, **7**, e44926.

764 59 Mathias, R.A., Sergeant, S., Ruczinski, I., Torgerson, D.G., Hugenschmidt, C.E., Kubala, M.,  
765 Vaidya, D., Suktitipat, B., Ziegler, J.T., Ivester, P. *et al.* (2011) The impact of FADS genetic variants on  
766 omega6 polyunsaturated fatty acid metabolism in African Americans. *BMC Genet*, **12**, 50.

767 60 Sukumaran, S.K., Stumpf, M., Salamon, S., Ahmad, I., Bhattacharya, K., Fischer, S., Müller, R.,  
768 Altmüller, J., Budde, B., Thiele, H. *et al.* (2017) CDK5RAP2 interaction with components of the Hippo  
769 signaling pathway may play a role in primary microcephaly. *Molecular genetics and genomics : MGG*,  
770 **292**, 365-383.

771 61 Barrera, J.A., Kao, L.R., Hammer, R.E., Seemann, J., Fuchs, J.L. and Megraw, T.L. (2010)  
772 CDK5RAP2 regulates centriole engagement and cohesion in mice. *Developmental cell*, **18**, 913-926.

773 62 Erten-Lyons, D., Wilmot, B., Anur, P., McWeeney, S., Westaway, S.K., Silbert, L., Kramer, P. and  
774 Kaye, J. (2011) Microcephaly genes and risk of late-onset Alzheimer disease. *Alzheimer disease and*  
775 *associated disorders*, **25**, 276-282.

776 63 Miron, J., Picard, C., Nilsson, N., Frappier, J., Dea, D., Theroux, L. and Poirier, J. (2018) CDK5RAP2  
777 gene and tau pathophysiology in late-onset sporadic Alzheimer's disease. *Alzheimer's & dementia : the*  
778 *journal of the Alzheimer's Association*, **14**, 787-796.

779 64 Schwienbacher, C., Sabbioni, S., Campi, M., Veronese, A., Bernardi, G., Menegatti, A., Hatada, I.,  
780 Mukai, T., Ohashi, H., Barbanti-Brodano, G. *et al.* (1998) Transcriptional map of 170-kb region at  
781 chromosome 11p15.5: identification and mutational analysis of the BWR1A gene reveals the presence of  
782 mutations in tumor samples. *Proceedings of the National Academy of Sciences of the United States of*  
783 *America*, **95**, 3873-3878.

784 65 Bajaj, V., Markandaya, M., Krishna, L. and Kumar, A. (2004) Paternal imprinting of the SLC22A1LS  
785 gene located in the human chromosome segment 11p15.5. *BMC Genet*, **5**, 13.

786 66 Bajaj, V., Singhmar, P. and Kumar, A. (2008) Promoter characterization and regulation of  
787 expression of an imprinted gene SLC22A18AS. *Gene*, **424**, 40-47.

788 67 Heger, S., Mastronardi, C., Dissen, G.A., Lomniczi, A., Cabrera, R., Roth, C.L., Jung, H., Galimi, F.,  
789 Sippell, W. and Ojeda, S.R. (2007) Enhanced at puberty 1 (EAP1) is a new transcriptional regulator of the  
790 female neuroendocrine reproductive axis. *The Journal of clinical investigation*, **117**, 2145-2154.

791 68 Conomos, M.P., Laurie, C.A., Stilp, A.M., Gogarten, S.M., McHugh, C.P., Nelson, S.C., Sofer, T.,  
792 Fernandez-Rhodes, L., Justice, A.E., Graff, M. *et al.* (2016) Genetic Diversity and Association Studies in US  
793 Hispanic/Latino Populations: Applications in the Hispanic Community Health Study/Study of Latinos. *Am*  
794 *J Hum Genet*, **98**, 165-184.

795 69 Lavange, L.M., Kalsbeek, W.D., Sorlie, P.D., Aviles-Santa, L.M., Kaplan, R.C., Barnhart, J., Liu, K.,  
796 Giachello, A., Lee, D.J., Ryan, J. *et al.* (2010) Sample design and cohort selection in the Hispanic  
797 Community Health Study/Study of Latinos. *Annals of epidemiology*, **20**, 642-649.

798 70 Sorlie, P.D., Aviles-Santa, L.M., Wassertheil-Smoller, S., Kaplan, R.C., Daviglius, M.L., Giachello,  
799 A.L., Schneiderman, N., Raij, L., Talavera, G., Allison, M. *et al.* (2010) Design and implementation of the  
800 Hispanic Community Health Study/Study of Latinos. *Annals of epidemiology*, **20**, 629-641.

801 71 Howie, B., Marchini, J. and Stephens, M. (2011) Genotype imputation with thousands of  
802 genomes. *G3 (Bethesda)*, **1**, 457-470.

803 72 Delaneau, O., Marchini, J. and Zagury, J.F. (2011) A linear complexity phasing method for  
804 thousands of genomes. *Nature methods*, **9**, 179-181.

805 73 Winkler, T.W., Justice, A.E., Graff, M., Barata, L., Feitosa, M.F., Chu, S., Czajkowski, J., Esko, T.,  
806 Fall, T., Kilpelainen, T.O. *et al.* (2015) The Influence of Age and Sex on Genetic Associations with Adult  
807 Body Size and Shape: A Large-Scale Genome-Wide Interaction Study. *PLoS genetics*, **11**, e1005378.

808 74 Randall, J.C., Winkler, T.W., Kutalik, Z., Berndt, S.I., Jackson, A.U., Monda, K.L., Kilpelainen, T.O.,  
809 Esko, T., Magi, R., Li, S. *et al.* (2013) Sex-stratified Genome-wide Association Studies Including 270,000  
810 Individuals Show Sexual Dimorphism in Genetic Loci for Anthropometric Traits. *PLoS genetics*, **9**,  
811 e1003500.

812 75 Conomos, M.P., Miller, M.B. and Thornton, T.A. (2015) Robust inference of population structure  
813 for ancestry prediction and correction of stratification in the presence of relatedness. *Genet Epidemiol*,  
814 **39**, 276-293.

815 76 Willer, C.J., Li, Y. and Abecasis, G.R. (2010) METAL: fast and efficient meta-analysis of  
816 genomewide association scans. *Bioinformatics (Oxford, England)*, **26**, 2190-2191.

817 77 Winkler, T.W., Kutalik, Z., Gorski, M., Lottaz, C., Kronenberg, F. and Heid, I.M. (2015) EasyStrata:  
818 evaluation and visualization of stratified genome-wide association meta-analysis data. *Bioinformatics*  
819 *(Oxford, England)*, **31**, 259-261.

820 78 Maples, B.K., Gravel, S., Kenny, E.E. and Bustamante, C.D. (2013) RFMix: a discriminative  
821 modeling approach for rapid and robust local-ancestry inference. *Am J Hum Genet*, **93**, 278-288.

822 79 Cavalli-Sforza, L.L. (2005) The Human Genome Diversity Project: past, present and future. *Nat*  
823 *Rev Genet*, **6**, 333-340.

824 80 International HapMap Consortium, Altshuler, D.M., Gibbs, R.A., Peltonen, L., Altshuler, D.M.,  
825 Gibbs, R.A., Peltonen, L., Dermitzakis, E., Schaffner, S.F., Yu, F. *et al.* (2010) Integrating common and rare  
826 genetic variation in diverse human populations. *Nature*, **467**, 52-58.

827 81 Browning, S.R. and Browning, B.L. (2007) Rapid and accurate haplotype phasing and missing-  
828 data inference for whole-genome association studies by use of localized haplotype clustering. *Am J Hum*  
829 *Genet*, **81**, 1084-1097.

830 82 Heid, I.M., Jackson, A.U., Randall, J.C., Winkler, T.W., Qi, L., Steinthorsdottir, V., Thorleifsson, G.,  
831 Zillikens, M.C., Speliotes, E.K., Magi, R. *et al.* (2010) Meta-analysis identifies 13 new loci associated with  
832 waist-hip ratio and reveals sexual dimorphism in the genetic basis of fat distribution. *Nat Genet*, **42**, 949-  
833 960.

834 83 Sofer, T., Heller, R., Bogomolov, M., Avery, C.L., Graff, M., North, K.E., Reiner, A.P., Thornton,  
 835 T.A., Rice, K., Benjamini, Y. *et al.* (2017) A powerful statistical framework for generalization testing in  
 836 GWAS, with application to the HCHS/SOL. *Genet Epidemiol*, **41**, 251-258.

837

838 **Figures**

839 **Figure 1.** WCadjBMI Synthesis View plot that shows  $-\log_{10} P$ -values, beta (effect estimate), effect/coded  
 840 allele frequency (CAF), and sample size across analysis samples for all loci that reached suggestive  
 841 significance in one or more of our discovery strata. This chart also shows the coded allele frequency  
 842 (CAF) of each of our top loci by background group and by 1000 genomes reference panel (European -  
 843 EUR, Latin American - AMR, and African - YRI).

844

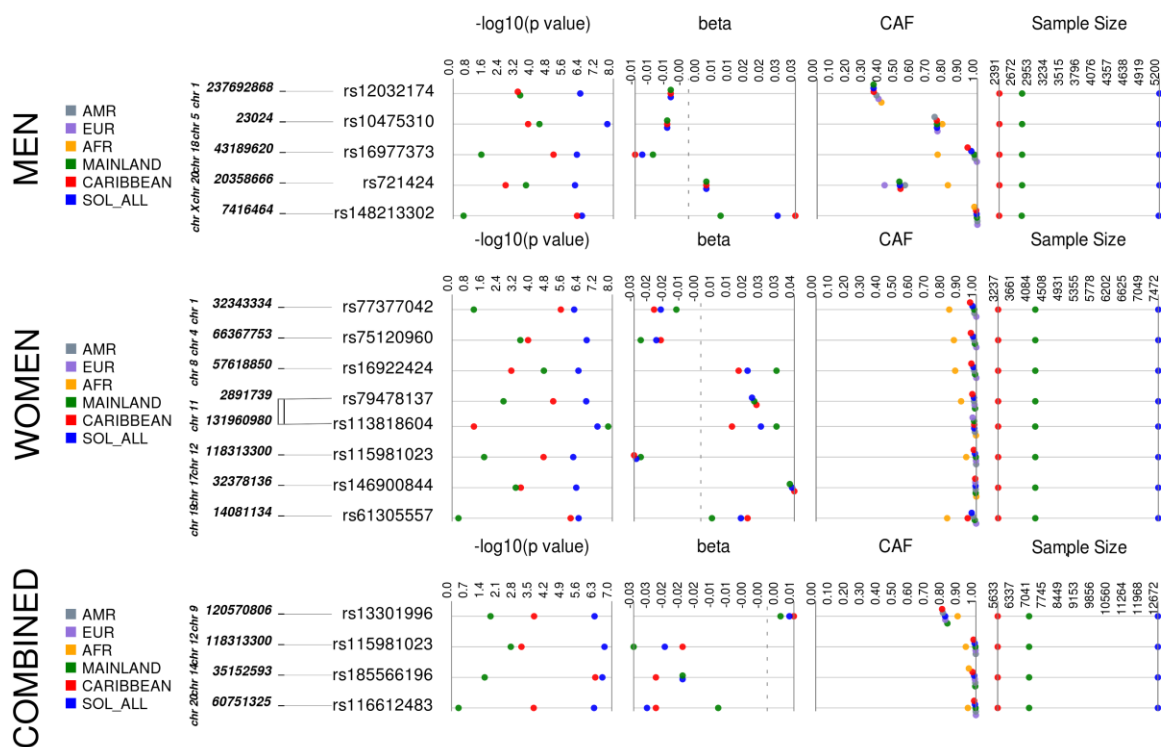

845

846

847 **Figure 2.** WHRadjBMI Synthesis View plot that shows  $-\log_{10} P$ -values, beta (effect estimate),  
 848 effect/coded allele frequency (CAF), and sample size across analysis samples for all loci that reached  
 849 suggestive significance in one or more of our discovery strata. This chart also shows the coded allele  
 850 frequency (CAF) of each of our top loci by background group and by 1000 genomes reference panel  
 851 (European - EUR, Latin American - AMR, and African - YRI).

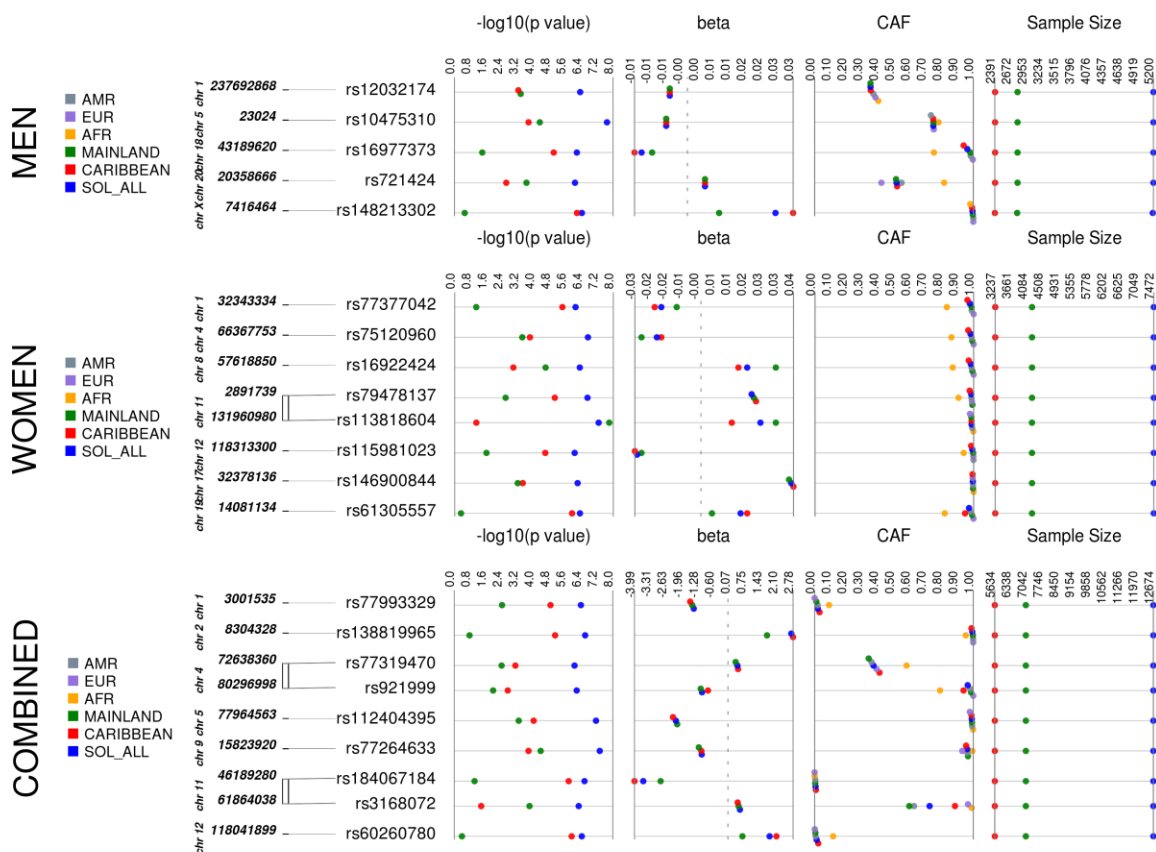

852

853

854 **Figure 3.** HIPadjBMI Synthesis View plot that shows the  $-\log_{10} P$ -values, beta (effect estimate),  
 855 effect/coded allele frequency (CAF), and sample size across analysis samples for all loci that reached  
 856 suggestive significance in one or more of our discovery strata. This chart also shows the coded allele  
 857 frequency (CAF) of each of our top loci by background group and by 1000 genomes reference panel  
 858 (European - EUR, Latin American - AMR, and African - YRI).

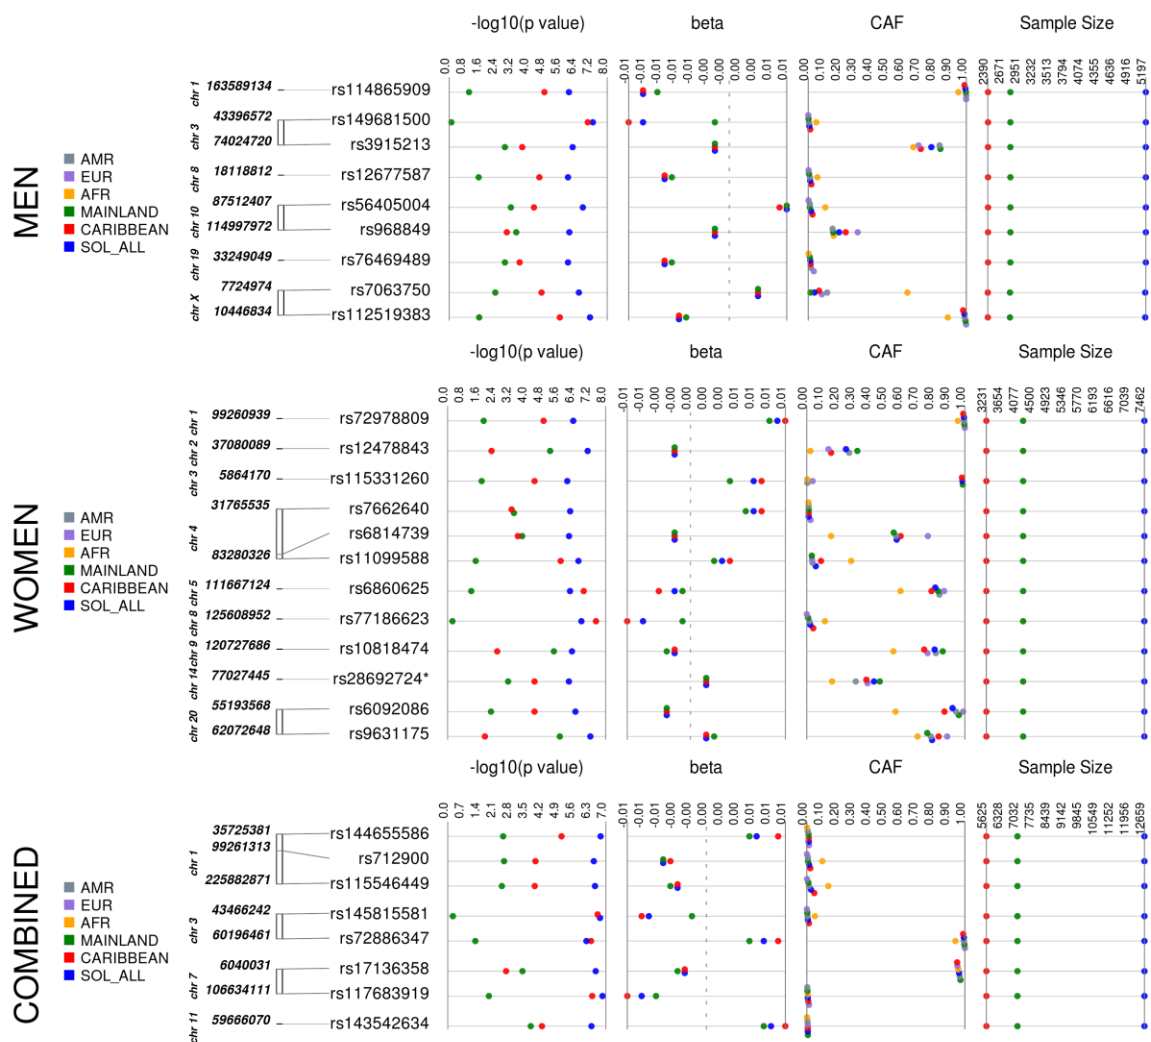

859

860

**Table 1.** Summary of association results for all loci that passed replication criteria. EAF-estimated allele frequency, chr- chromosome, pos- position, SE- standard error, ISQ- I squared heterogeneity.

| Stratum                        | dbSNPID     | CHR | POS<br>(GRCh38) | Nearest<br>Gene | Effect<br>Allele | Other<br>Allele | Stage             | EAF    | Beta    | SE     | P               | N      |
|--------------------------------|-------------|-----|-----------------|-----------------|------------------|-----------------|-------------------|--------|---------|--------|-----------------|--------|
| <b>WHRadjBMI</b>               |             |     |                 |                 |                  |                 |                   |        |         |        |                 |        |
| AA <sup>†</sup> - Combined     | rs13301996  | 9   | 120570806       | CDK5RAP2        | T                | G               | SOL               | 0.8080 | 0.0050  | 0.0010 | 5.69E-07        | 12,672 |
|                                |             |     |                 |                 |                  |                 | Replication       | 0.8720 | 0.0036  | 0.0014 | 1.10E-02        | 12,496 |
|                                |             |     |                 |                 |                  |                 | SOL + Replication | 0.8295 | 0.0045  | 0.0008 | <b>2.88E-08</b> | 25,168 |
| HL <sup>‡</sup> - Women        | rs79478137  | 11  | 2891739         | SLC22A18AS      | T                | C               | SOL               | 0.0150 | -0.0230 | 0.0040 | 2.03E-07        | 7,472  |
|                                |             |     |                 |                 |                  |                 | Replication       | 0.0169 | -0.0116 | 0.0054 | 3.12E-02        | 6,582  |
|                                |             |     |                 |                 |                  |                 | SOL + Replication | 0.0157 | -0.0189 | 0.0032 | <b>3.64E-09</b> | 14,054 |
| <b>HIPadjBMI</b>               |             |     |                 |                 |                  |                 |                   |        |         |        |                 |        |
| EUR <sup>¥</sup> - Women       | rs28692724* | 14  | 77027445        | IRF2BPL         | T                | C               | SOL               | 0.4250 | 0.0020  | 0.0004 | 7.32E-07        | 7462   |
|                                |             |     |                 |                 |                  |                 | Replication       | 0.303  | 0.789   | 0.305  | 9.62E-03        | 4,678  |
|                                |             |     |                 |                 |                  |                 | SOL + Replication | 0.3781 | 5.4900  |        | <b>4.02E-08</b> | 12,140 |
| <b>WCadjBMI</b>                |             |     |                 |                 |                  |                 |                   |        |         |        |                 |        |
| EUR <sup>¥</sup> -<br>Combined | rs3168072   | 11  | 61864038        | FADS2           | A                | T               | SOL               | 0.7250 | 0.5140  | 0.1020 | 5.28E-07        | 12,674 |
|                                |             |     |                 |                 |                  |                 | Replication       | 0.9750 | 2.0132  | 0.6323 | 1.45E-03        | 8,845  |
|                                |             |     |                 |                 |                  |                 | SOL + Replication | 0.7313 | 0.5520  | 0.1007 | <b>4.21E-08</b> | 21,519 |

\*For rs28692724, SOL analyses were performed on log10 transformed hip circumference, while replication analyses in european-descent population used untransformed hip measurements. In the SOL + Replication analyses, a z-score is provided instead of a beta.

†African American (AA) replication samples included : Atherosclerosis Risk in Communities(ARIC) Study, Multi-Ethnic Study of Atherosclerosis(MESA), Women's Health Initiative(WHI)

‡Hispanic Latino (HL) replication samples included : Genetics of Latinos Diabetic Retinopathy(GOLDLDR), Hispanic Community Health Study / Study of Latinos(HCHS/SOL), Mexican–American Hypertension Study(HTN), Mexican-American Coronary Artery Disease(MACAD), Multi-Ethnic Study of Atherosclerosis(MESA), Mexico-City, 1982 Pelotas Birth Cohort(PELOTAS), Starr County Health

¥European American (EA) replication samples included : Atherosclerosis Risk in Communities(ARIC)

\*\* rs28692724 is <500 Kb from a previously reported SNP nominally associated with WHRadjBMI (PMID: 28552196).

861

862



**Table 2.** Summary of top association results in SOL subgroup analyses. EAF-effect allele frequency, CHR- chromosome, POS- position, SE- standard error, ISQ- I squared heterogeneity. \*EAF for reference population obtained from ExAC; all other estimated are from 1000 Genomes Project Phase 3.

| Stratum           | dnSNPID     | CHR | POS<br>(GRCh38) | Nearest<br>Gene | Effect<br>Allele | Other<br>Allele | Subgroup  | EAF    | Beta    | SE     | P        | N      | Pdiff    | EAF   |       |       |
|-------------------|-------------|-----|-----------------|-----------------|------------------|-----------------|-----------|--------|---------|--------|----------|--------|----------|-------|-------|-------|
|                   |             |     |                 |                 |                  |                 |           |        |         |        |          |        |          | AFR   | EUR   | AMR   |
| <b>WHRadjBMI</b>  |             |     |                 |                 |                  |                 |           |        |         |        |          |        |          |       |       |       |
| AA -<br>Combined  | rs13301996  | 9   | 120570806       | CDK5RAP2        | T                | G               | SOL       | 0.8080 | 0.0050  | 0.0010 | 5.69E-07 | 12,672 | 1.88E-01 | 0.886 | 0.809 | 0.794 |
|                   |             |     |                 |                 |                  |                 | Mainland  | 0.8220 | 0.0034  | 0.0014 | 1.95E-02 | 7,013  |          |       |       |       |
|                   |             |     |                 |                 |                  |                 | Caribbean | 0.7890 | 0.0061  | 0.0017 | 2.52E-04 | 5,633  |          |       |       |       |
| HL - Women        | rs79478137  | 11  | 2891739         | SLC22A18A5      | T                | C               | SOL       | 0.0150 | -0.0230 | 0.0040 | 2.03E-07 | 7,472  | 3.97E-01 | 0.095 | 0.011 | 0.010 |
|                   |             |     |                 |                 |                  |                 | Mainland  | 0.0080 | -0.0241 | 0.0080 | 2.72E-03 | 4,220  |          |       |       |       |
|                   |             |     |                 |                 |                  |                 | Caribbean | 0.0250 | -0.0250 | 0.0056 | 8.87E-06 | 3,238  |          |       |       |       |
| <b>HIPadjBMI</b>  |             |     |                 |                 |                  |                 |           |        |         |        |          |        |          |       |       |       |
| EUR - Women       | rs28692724* | 14  | 77027445        | IRF2BPL         | T                | C               | SOL       | 0.4250 | 0.0020  | 0.0004 | 7.32E-07 | 7,462  | 2.31E-01 | 0.160 | 0.384 | 0.310 |
|                   |             |     |                 |                 |                  |                 | Mainland  | 0.462  | 0.0017  | 0.001  | 8.70E-04 | 4,216  |          |       |       |       |
|                   |             |     |                 |                 |                  |                 | Caribbean | 0.3765 | 0.0025  | 0.0006 | 4.02E-05 | 3,232  |          |       |       |       |
| <b>WCadjBMI</b>   |             |     |                 |                 |                  |                 |           |        |         |        |          |        |          |       |       |       |
| EUR -<br>Combined | rs3168072   | 11  | 61864038        | FADS2           | A                | T               | SOL       | 0.7250 | 0.5140  | 0.1020 | 5.28E-07 | 12,674 | 3.94E-01 | 0.990 | 0.967 | 0.630 |
|                   |             |     |                 |                 |                  |                 | Mainland  | 0.5969 | 0.4552  | 0.1204 | 1.57E-04 | 7,013  |          |       |       |       |
|                   |             |     |                 |                 |                  |                 | Caribbean | 0.8846 | 0.4170  | 0.2075 | 4.45E-02 | 5,635  |          |       |       |       |
