# Supplementary material for: Genome-wide association study of body fat distribution traits in Hispanics/Latinos from the HCHS/SOL Study
Source: bioRxiv or medRxiv preprint supplement (doi:10.1101/2021.02.23.21251958), 2021-02-25
Supplement: Supplementary file [file media-1.pdf]

## Supplementary Materials

### Table of Contents

| <b>Supplementary Figures</b> |                                                         | <b>Pages 3-100</b>   |
|------------------------------|---------------------------------------------------------|----------------------|
| Supplementary Figure 1       | Manhattan Plot: WHRadjBMI, Sexes-Combined               | 3                    |
| Supplementary Figure 2       | Locus Zoom Plots: WHRadjBMI, Sexes-Combined             | 4-8                  |
| Supplementary Figure 3       | Manhattan Plot: WHRadjBMI, Women                        | 9                    |
| Supplementary Figure 4       | Locus Zoom Plots: WHRadjBMI, Women                      | 10-18                |
| Supplementary Figure 5       | Manhattan Plot: WHRadjBMI, Men                          | 19                   |
| Supplementary Figure 6       | Locus Zoom Plots: WHRadjBMI, Men                        | 20-25                |
| Supplementary Figure 7       | QQ Plots: WHRadjBMI                                     | 26                   |
| Supplementary Figure 8       | Manhattan Plot: WCadjBMI, Sexes-Combined                | 27                   |
| Supplementary Figure 9       | Locus Zoom Plots: WCadjBMI, Sexes-Combined              | 28-37                |
| Supplementary Figure 10      | Manhattan Plot: WCadjBMI, Women                         | 38                   |
| Supplementary Figure 11      | Locus Zoom Plots: WCadjBMI, Women                       | 39-41                |
| Supplementary Figure 12      | Manhattan Plot: WCadjBMI, Men                           | 42                   |
| Supplementary Figure 13      | Locus Zoom Plots: WCadjBMI, Men                         | 43-54                |
| Supplementary Figure 14      | QQ Plots: WCadjBMI                                      | 55                   |
| Supplementary Figure 15      | Manhattan Plot: HIPadjBMI, Sexes-Combined               | 56                   |
| Supplementary Figure 16      | Locus Zoom Plots: HIPadjBMI, Sexes-Combined             | 57-65                |
| Supplementary Figure 17      | Manhattan Plot: HIPadjBMI, Women                        | 66                   |
| Supplementary Figure 18      | Locus Zoom Plots: HIPadjBMI, Women                      | 67-79                |
| Supplementary Figure 19      | Manhattan Plot: HIPadjBMI, Men                          | 80                   |
| Supplementary Figure 20      | Locus Zoom Plots: HIPadjBMI, Men                        | 81-90                |
| Supplementary Figure 21      | QQ Plots: HIPadjBMI                                     | 91                   |
| Supplementary Figure 22      | Generalization of Known Loci: WHRadjBMI, Sexes-Combined | 92                   |
| Supplementary Figure 23      | Generalization of Known Loci: WHRadjBMI, Women          | 93                   |
| Supplementary Figure 24      | Generalization of Known Loci: WHRadjBMI, Men            | 94                   |
| Supplementary Figure 25      | Generalization of Known Loci: WCadjBMI, Sexes-Combined  | 95                   |
| Supplementary Figure 26      | Generalization of Known Loci: WCadjBMI, Women           | 96                   |
| Supplementary Figure 27      | Generalization of Known Loci: WCadjBMI, Men             | 97                   |
| Supplementary Figure 28      | Generalization of Known Loci: HIPadjBMI, Sexes-Combined | 98                   |
| Supplementary Figure 29      | Generalization of Known Loci: HIPadjBMI, Women          | 99                   |
| Supplementary Figure 30      | Generalization of Known Loci: HIPadjBMI, Men            | 100                  |
| <b>Supplementary Tables</b>  |                                                         | <b>Pages 101-121</b> |
| Supplementary Table 1        | Study Descriptives and Genotyping Info                  | 101                  |
| Supplementary Table 2        | Discovery and Replication Results: WHRadjBMI            | 102                  |
| Supplementary Table 3        | Discovery and Replication Results: WCadjBMI             | 103-104              |
| Supplementary Table 4        | Discovery and Replication Results: HIPadjBMI            | 105-106              |
| Supplementary Table 5        | Association by Background Group: WHRadjBMI              | 107                  |
| Supplementary Table 6        | Association by Background Group: WCadjBMI               | 108                  |
| Supplementary Table 7        | Association by Background Group: HIPadjBMI              | 109                  |
| Supplementary Table 8        | Local Ancestry                                          | 110-111              |
| Supplementary Table 9        | Top Variant Generalization: WHRadjBMI                   | 112                  |
| Supplementary Table 10       | Top Variant Generalization: WCadjBMI                    | 113                  |

|                        |                                                        |         |
|------------------------|--------------------------------------------------------|---------|
| Supplementary Table 11 | Top Variant Generalization: HIPadjBMI                  | 114     |
| Supplementary Table 12 | Genetic Risk Score Generalization                      | 115     |
| Supplementary Table 13 | Phenoscaner Results: GWAS                              | 116     |
| Supplementary Table 14 | Phenoscaner Results: eQTL                              | 117-118 |
| Supplementary Table 15 | Phenoscaner Results: mQTL                              | 119     |
| Supplementary Table 16 | HaploReg Results (Note: Full results in separate file) | 120-121 |

**Supplementary Figure 1. Manhattan plot.** Manhattan plot of the sexes-combined analysis for WHRadjBMI. All suggestively significant ( $P < 1 \times 10^{-6}$ ) variants are highlighted in orange if they are >500 Kb from any previously-reported WHRadjBMI associated variants. Previously reported loci (+/- 500 Kb) are highlighted in blue if any variant in the locus reached suggestive significance. All suggestively significant loci that meet our criteria for replication are annotated with the closest gene. † Replicated in African American meta-analysis. ‡ Replicated in Hispanic/Latino meta-analysis. ¥ Replicated in European American meta-analysis.

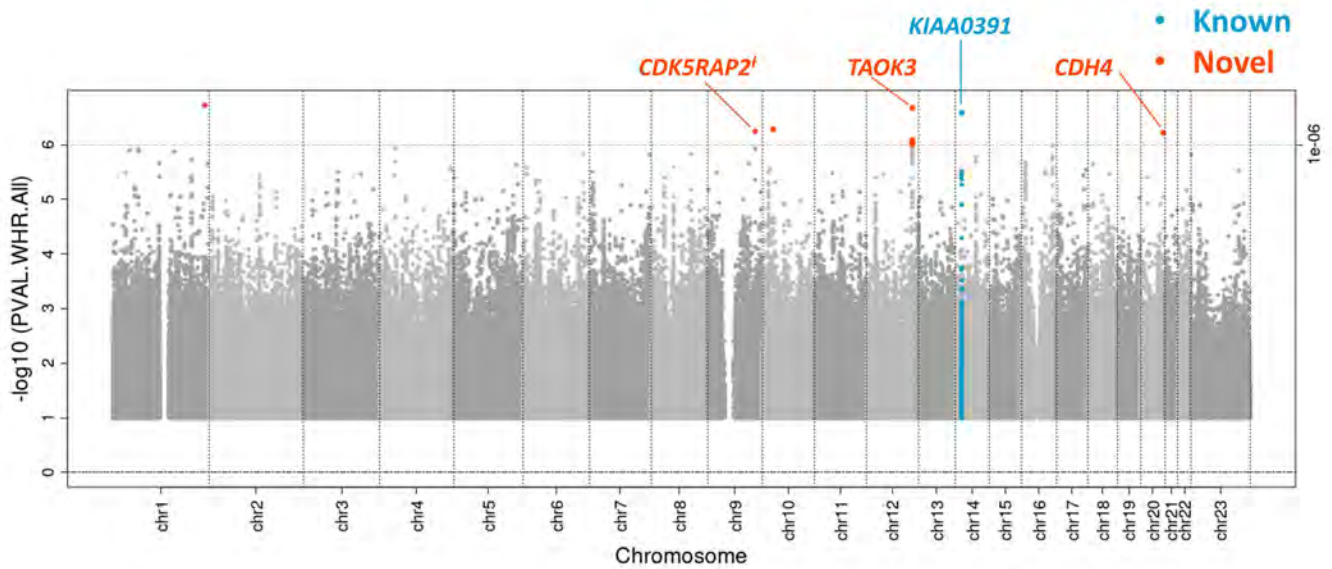

**Supplementary Figure 2. Locus Zoom Plots.** Regional association plots for suggestively significant loci in the HCHS/SOL WHRadjBMI sexes-combined analysis. The plots appear in chromosome:position order. Dot color reflects  $R^2$  calculated from the 1000 Genomes AMR reference dataset. Point symbols represent variant functional classifications: a) rs13301996, *CDK5RAP2*; b) rs115981023, *TAOK3*; c) rs185566196, *KIAA0391*; d) rs116612483, *CDH4*.

# a) WHRadjBMI All

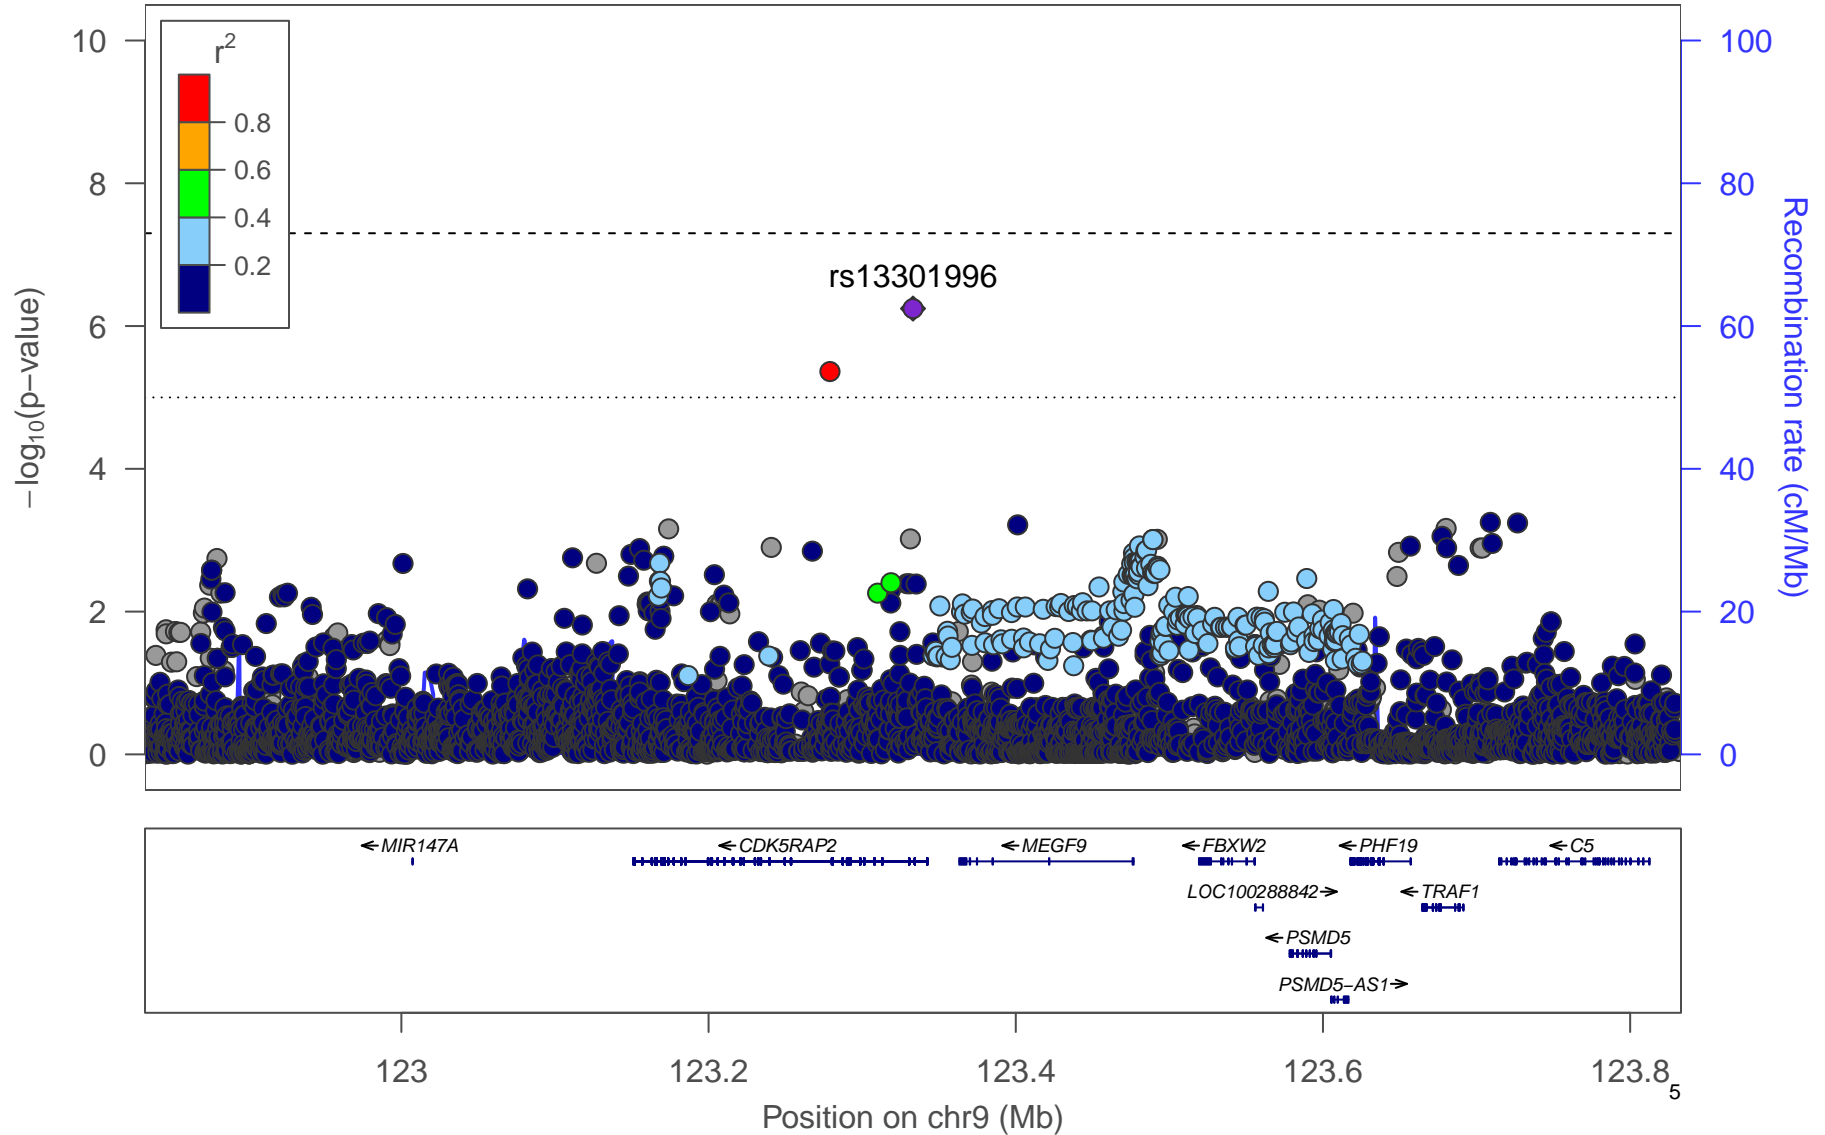

## b) WHRadjBMI All

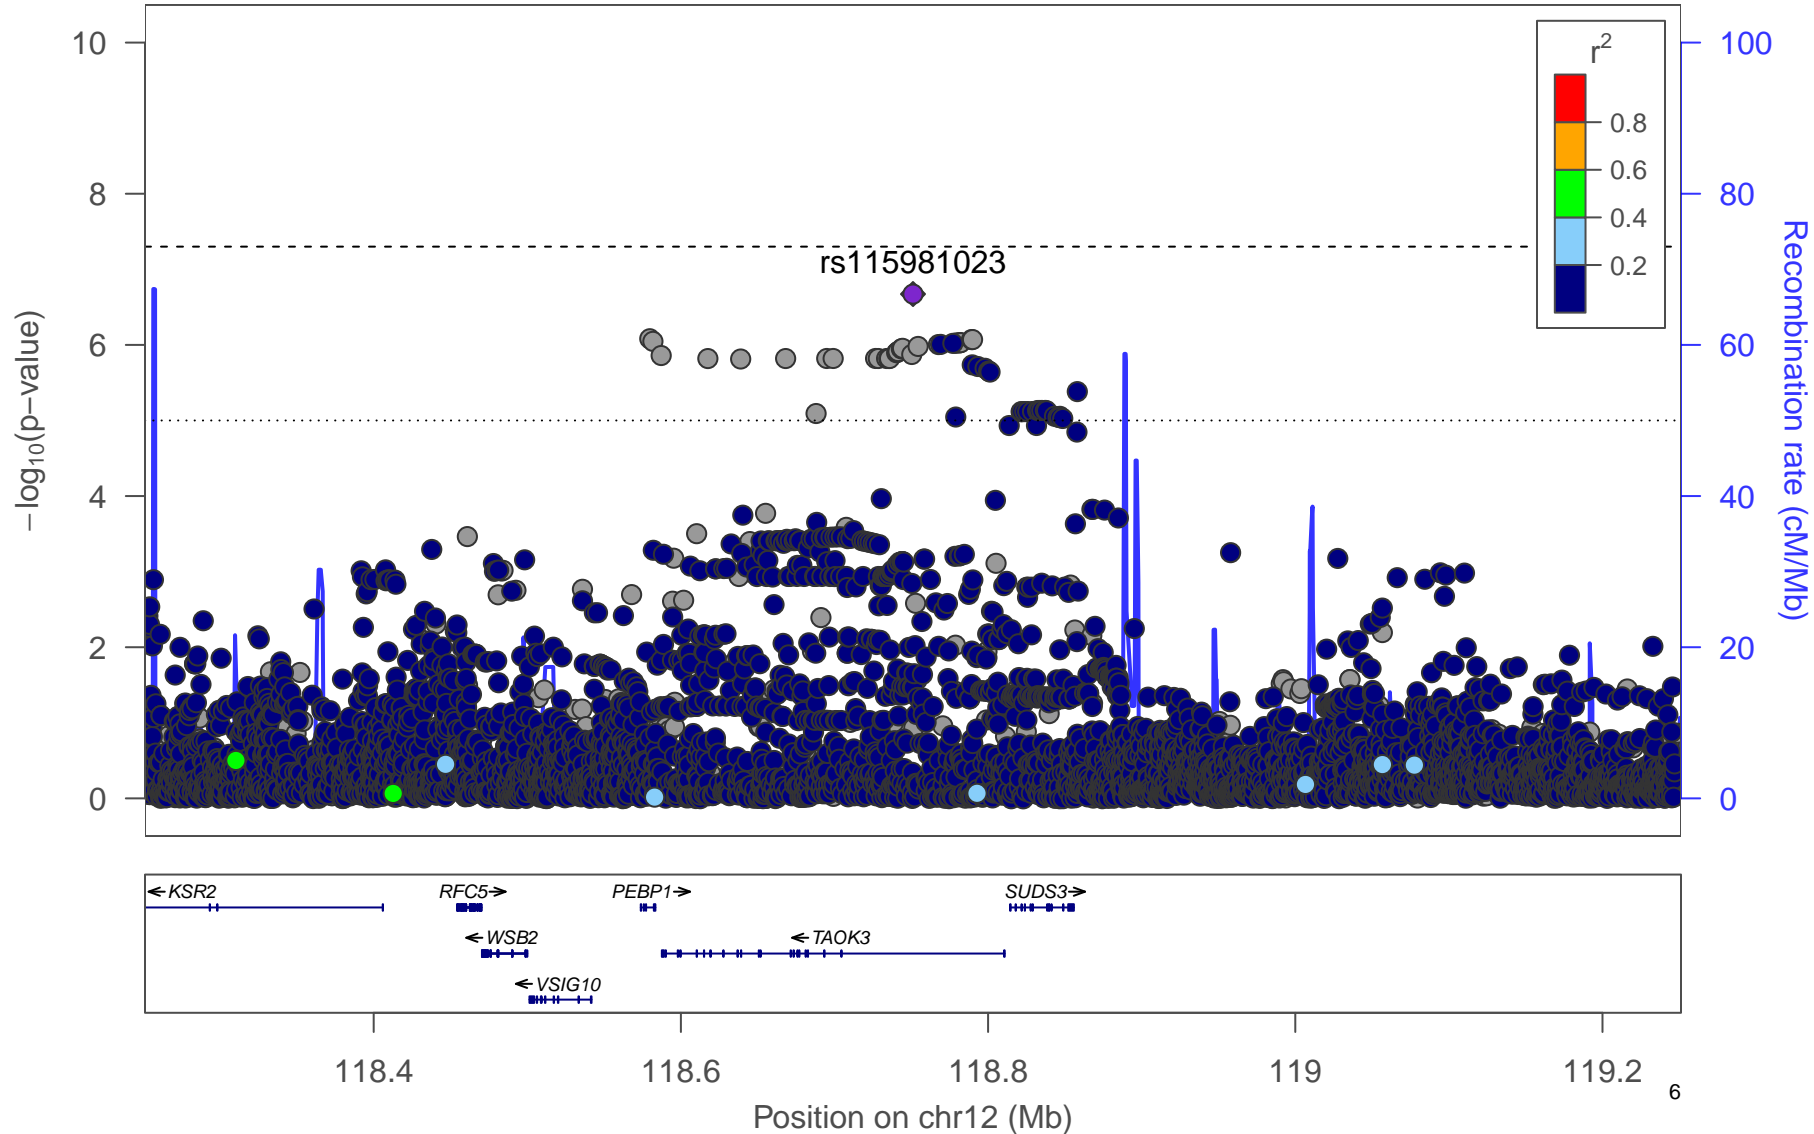

# c) WHRadjBMI All

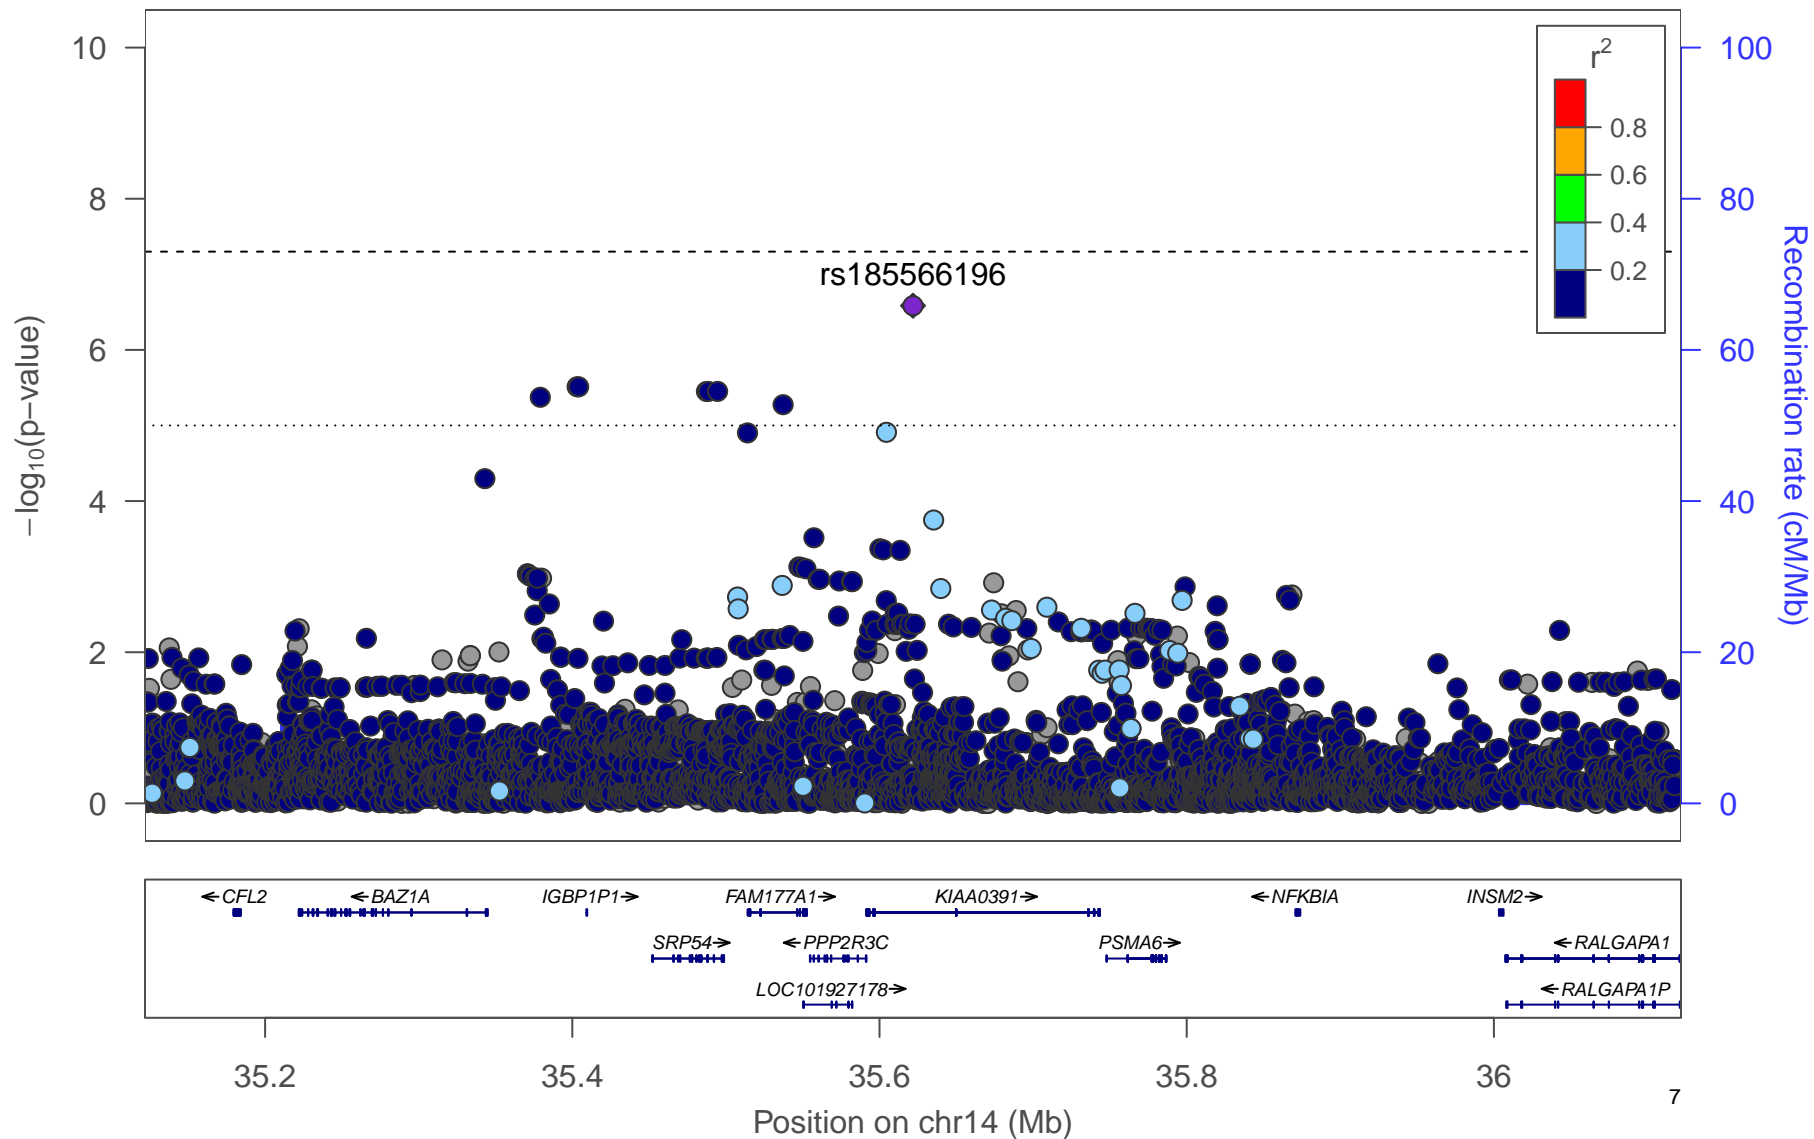

# d) WHRadjBMI All

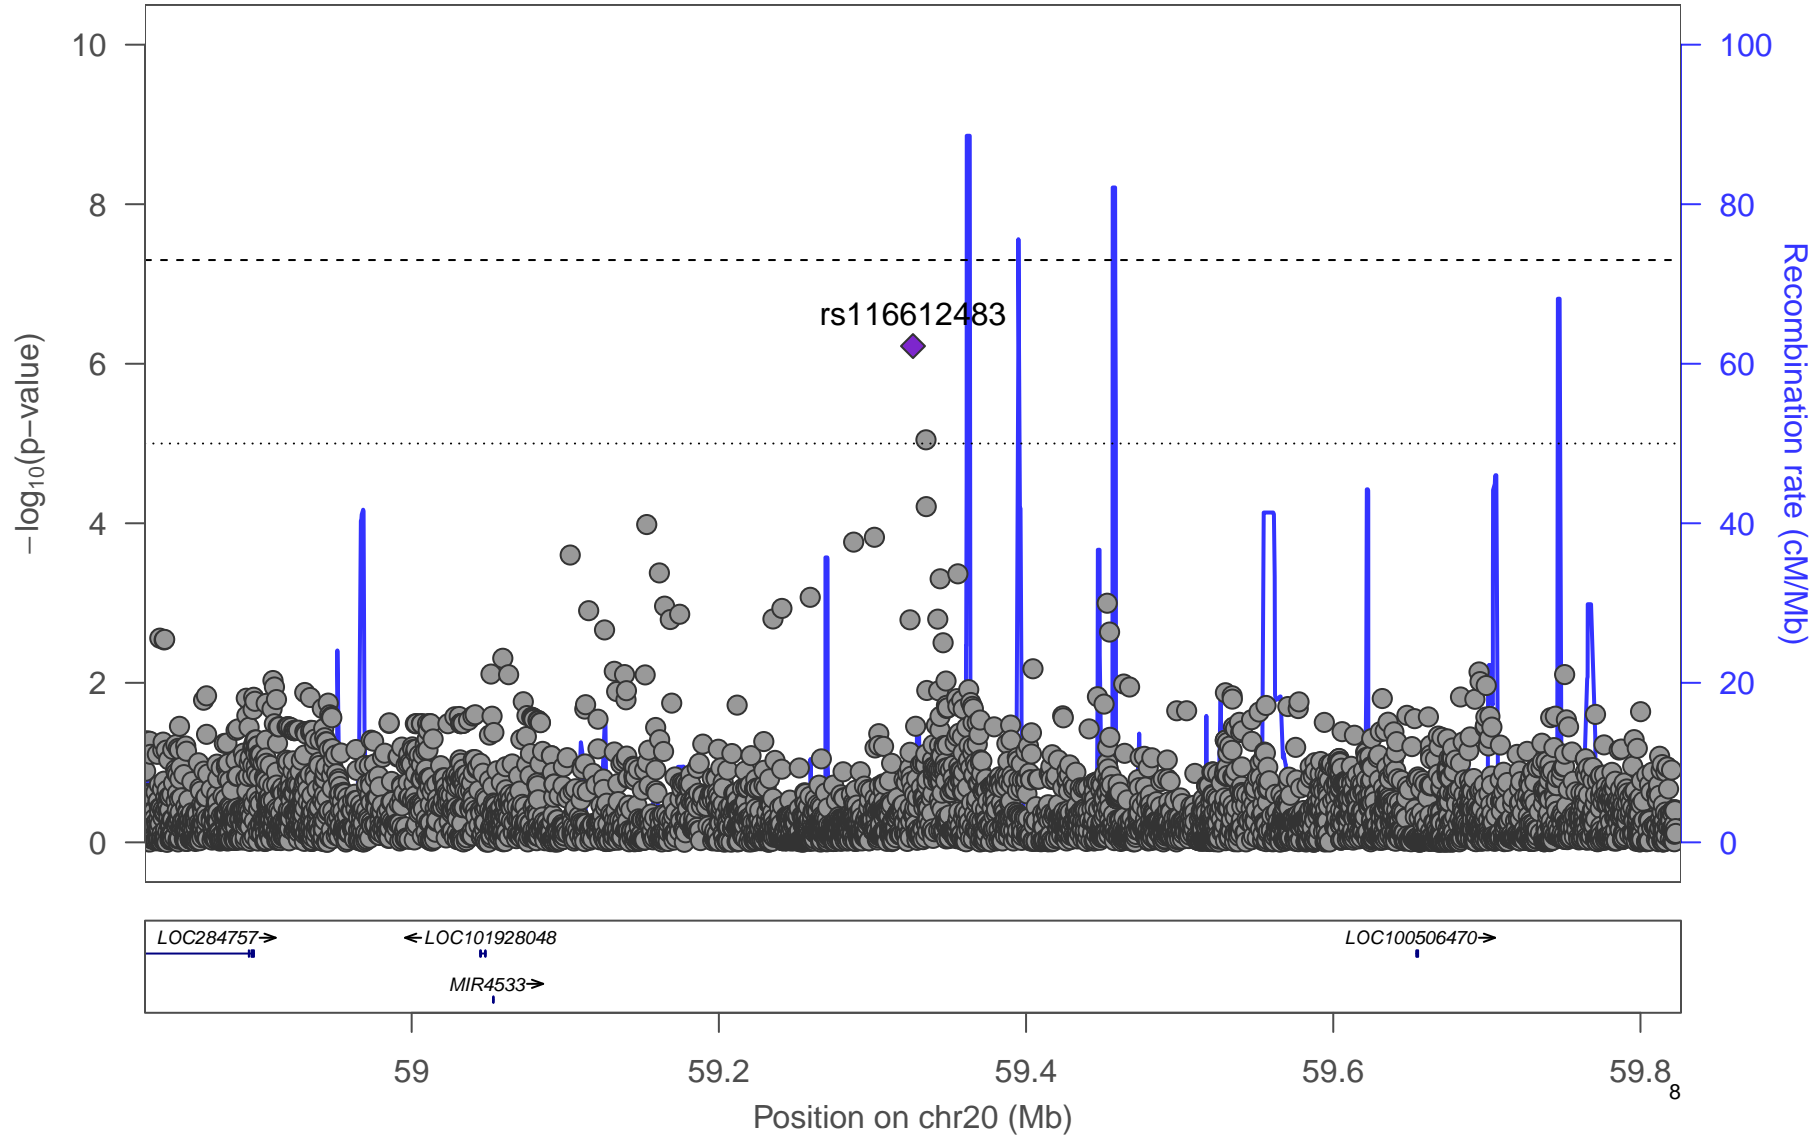



**Supplementary Figure 3. Manhattan plot.** Manhattan plot of the women-only analysis for WHRadjBMI. All suggestively significant ( $P < 1 \times 10^{-6}$ ) variants are highlighted in orange if they are  $> 500$  Kb from any previously-reported WHRadjBMI associated variants. Previously reported loci ( $\pm 500$  Kb) are highlighted in blue if any variant in the locus reached suggestive significance. All suggestively significant loci that meet our criteria for replication are annotated with the closest gene. † Replicated in African American meta-analysis. ‡ Replicated in Hispanic/Latino meta-analysis. ¥ Replicated in European American meta-analysis.

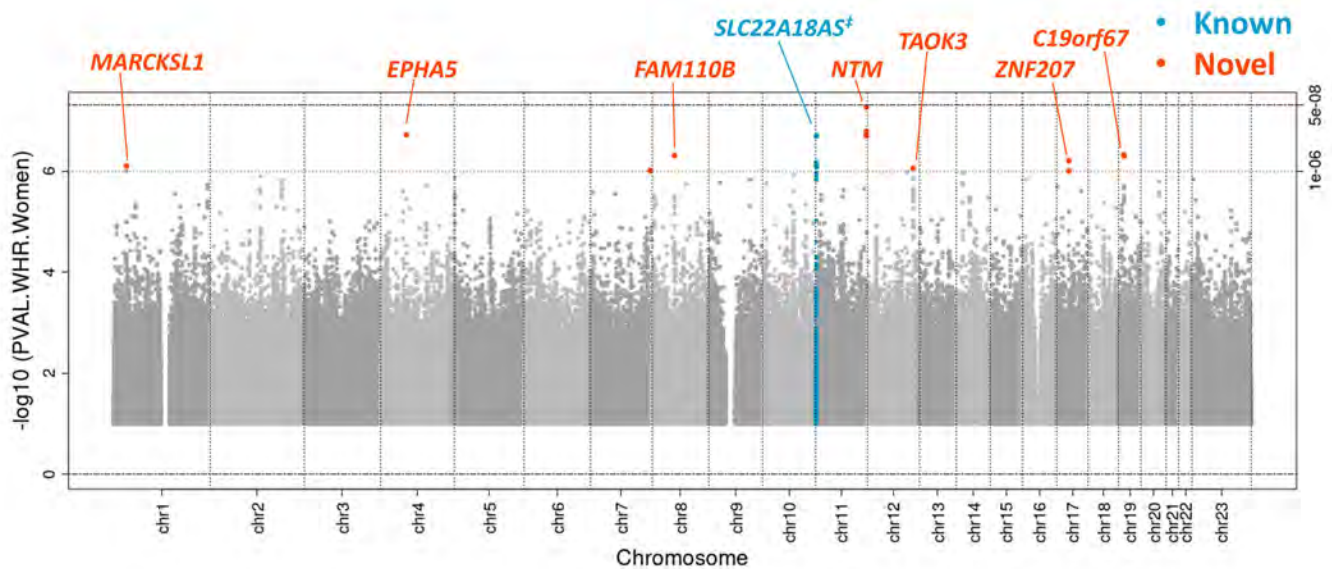

**Supplementary Figure 4. Locus Zoom Plots.** Regional association plots for suggestively significant loci in the HCHS/SOL WHRadjBMI women-only analysis. The plots appear in chromosome:position order. Dot color reflects  $R^2$  calculated from the 1000 Genomes AMR reference dataset. Point symbols represent variant functional classifications: a) rs77377042, *MARCKSL1*; b) rs75120960, *EPHA5*; c) rs16922424, *FAM110B*; d) rs79478137, *SLC22A18AS*; e) rs113818604, *NTM*; f) rs115981023, *TAOK3*; g) rs146900844, *ZNF207*; h) rs61305557, *C19orf67*.



## b) WHRadjBMI Women

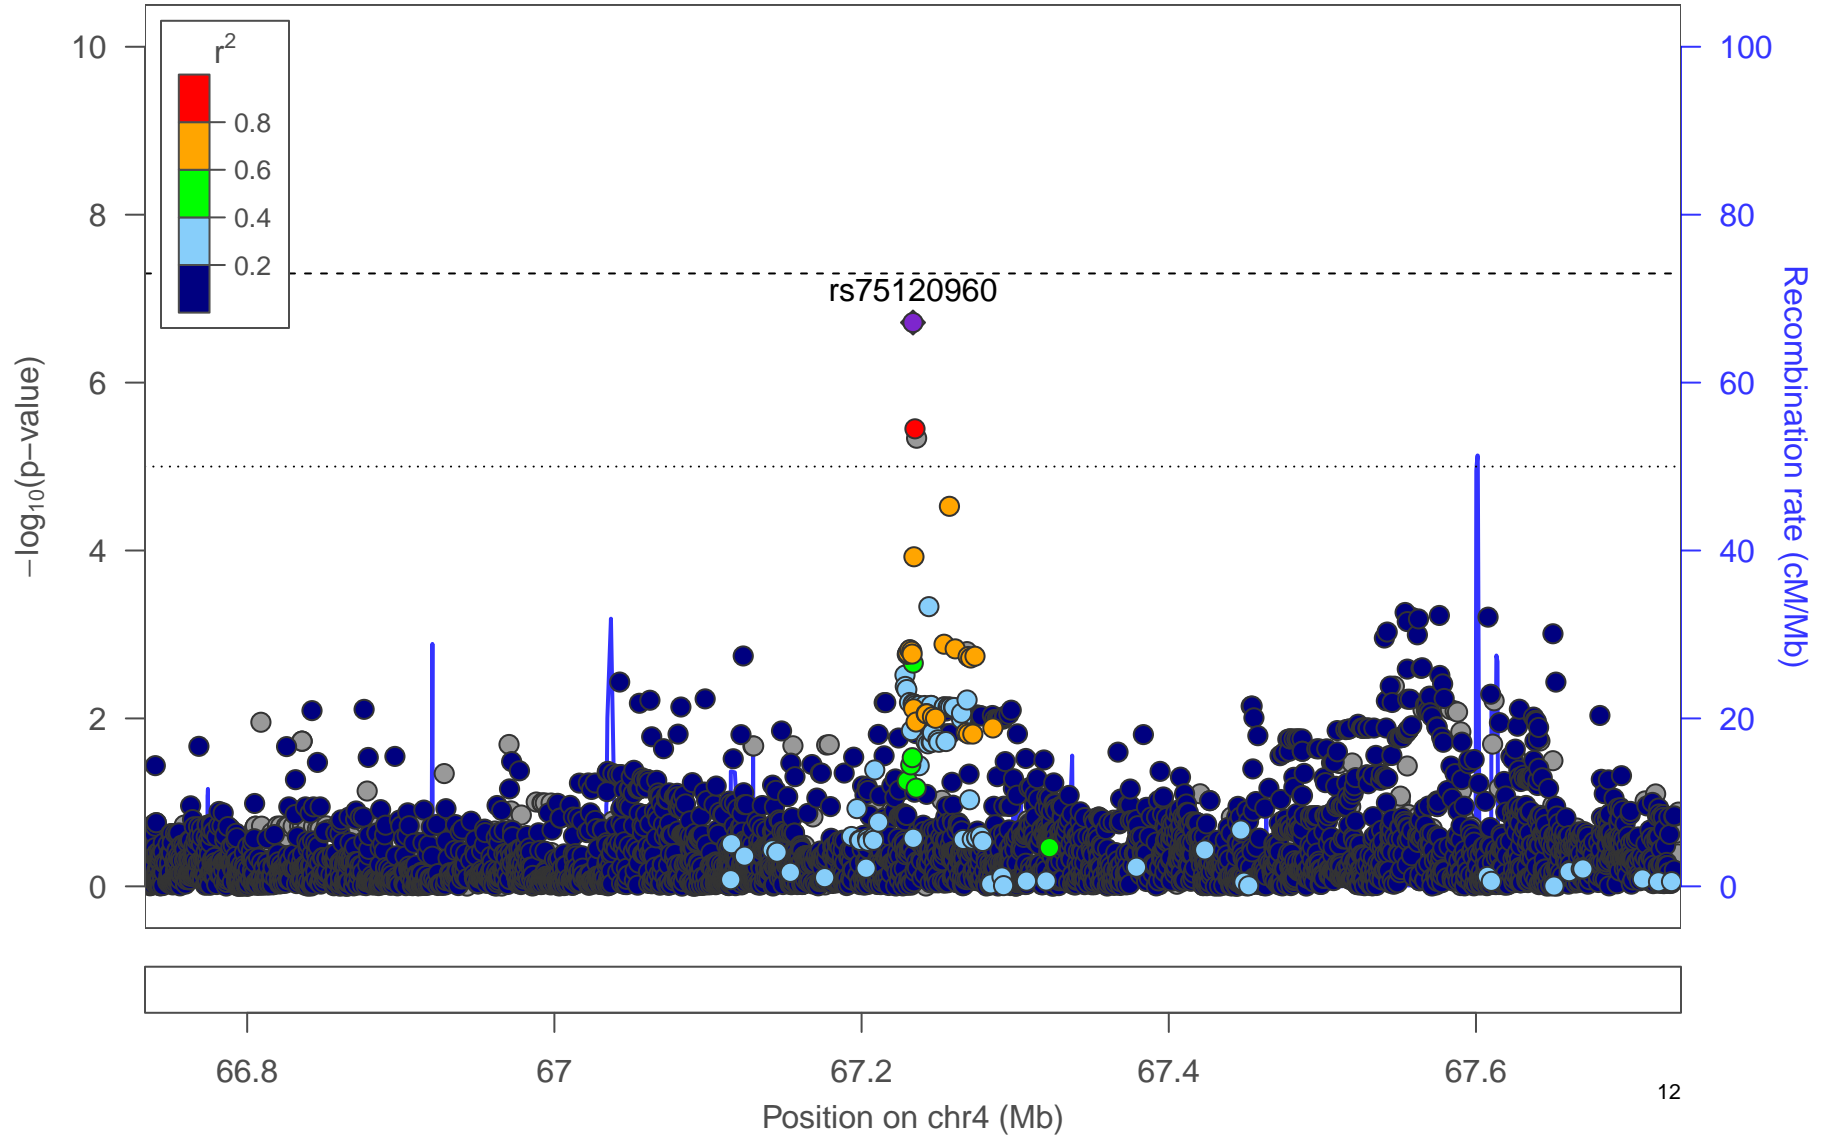

# c) WHRadjBMI Women

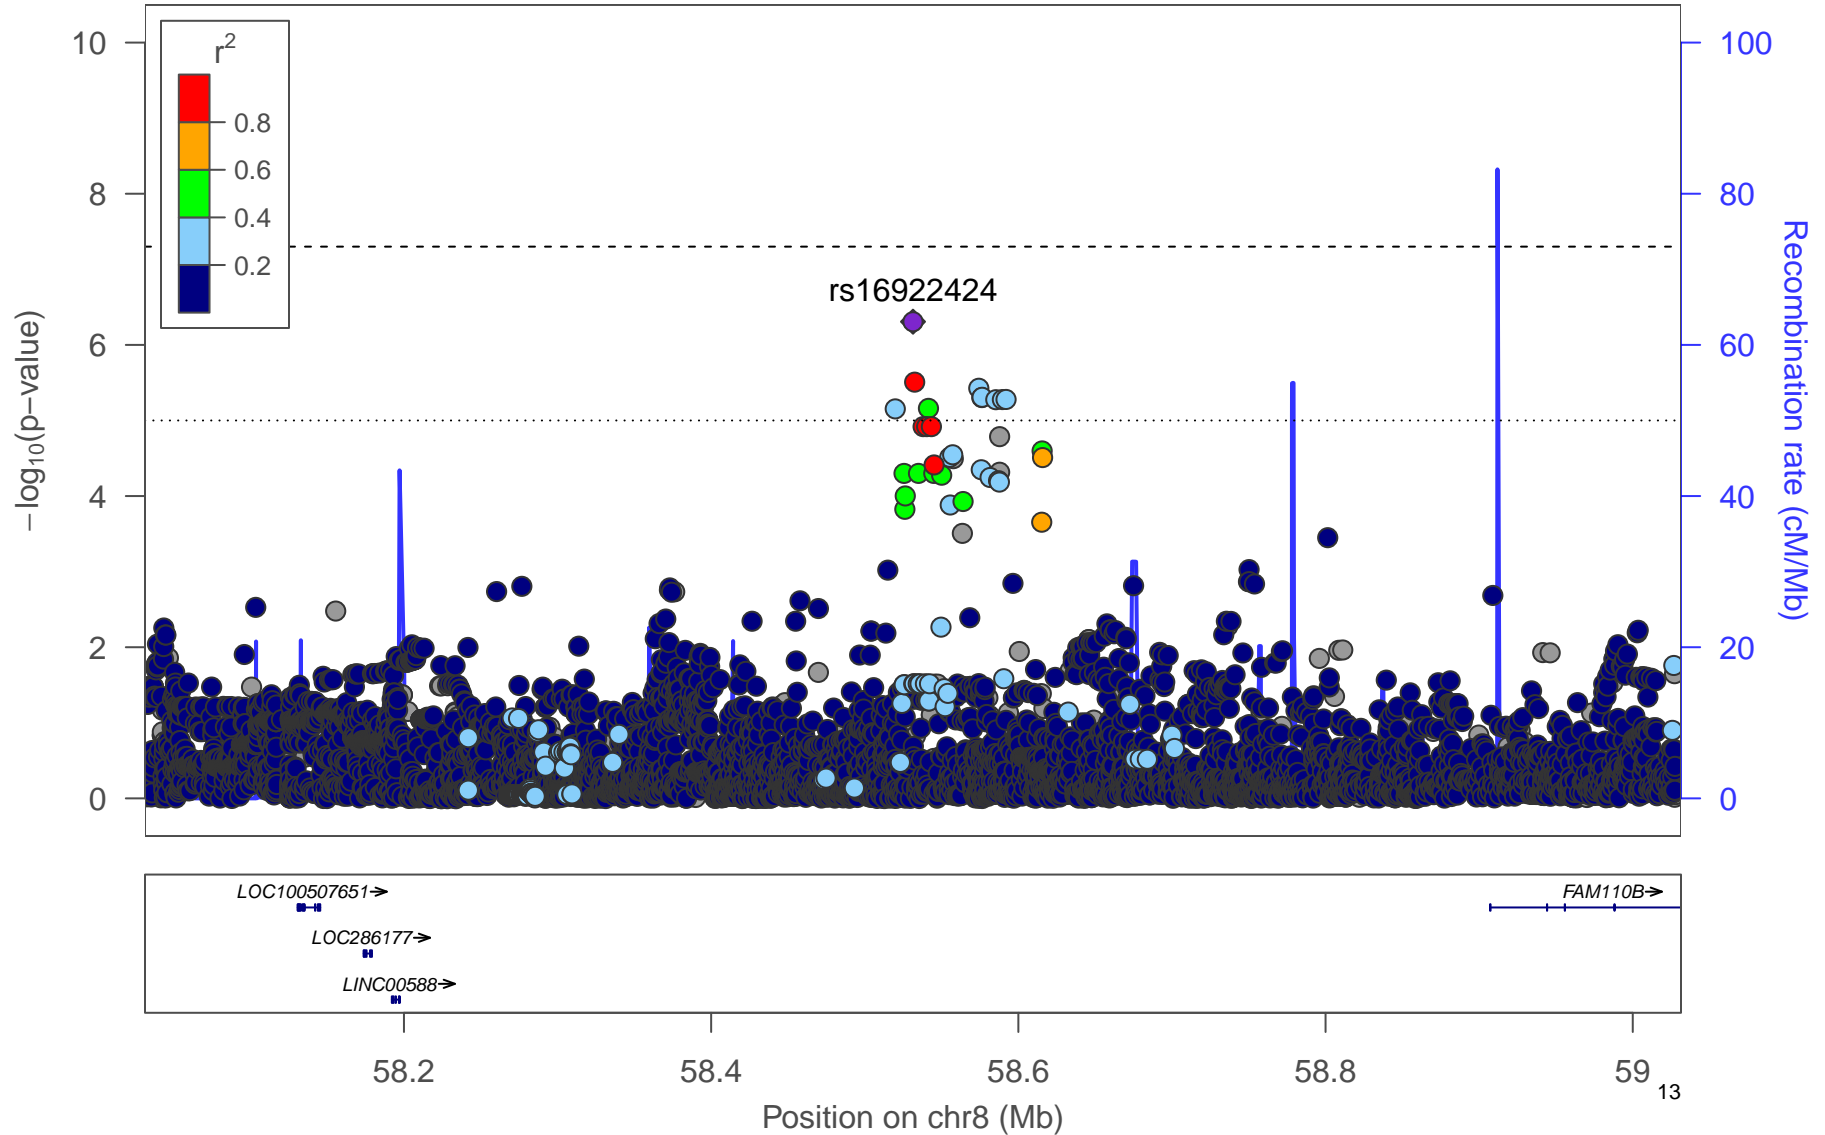

# d) WHRadjBMI Women

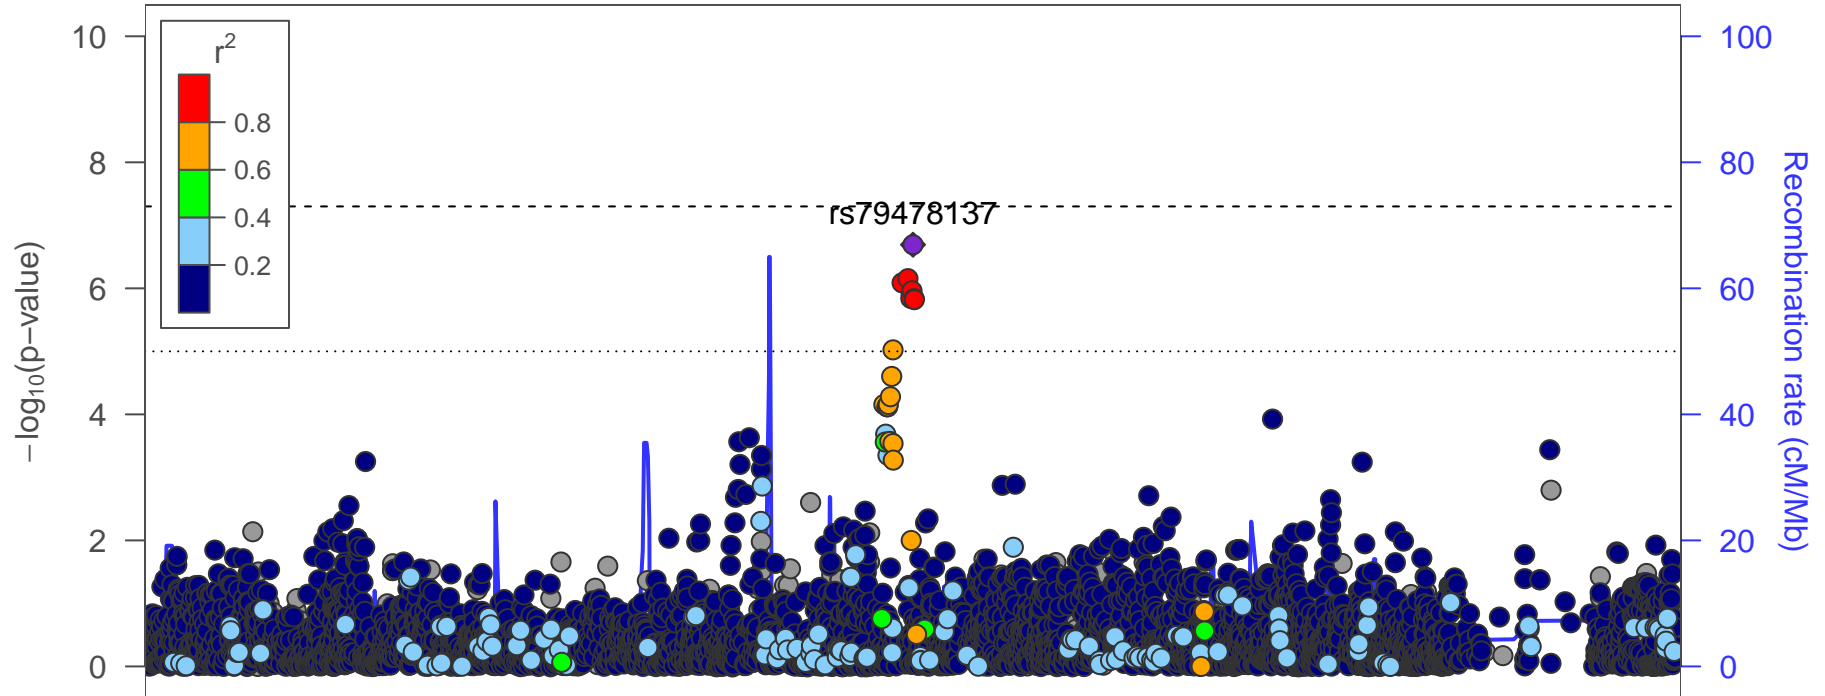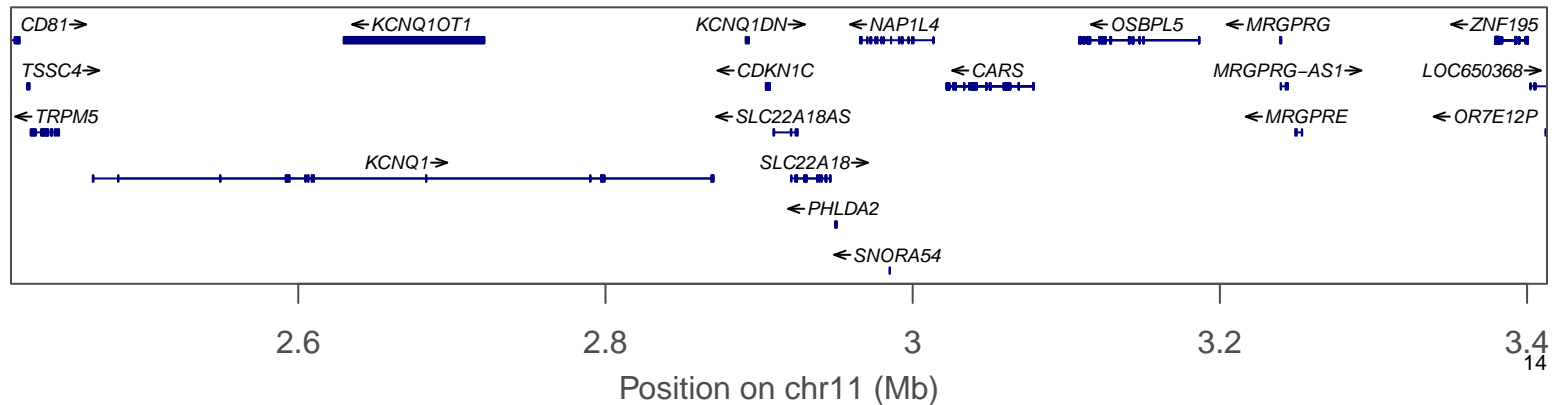

# e) WHRadjBMI Women

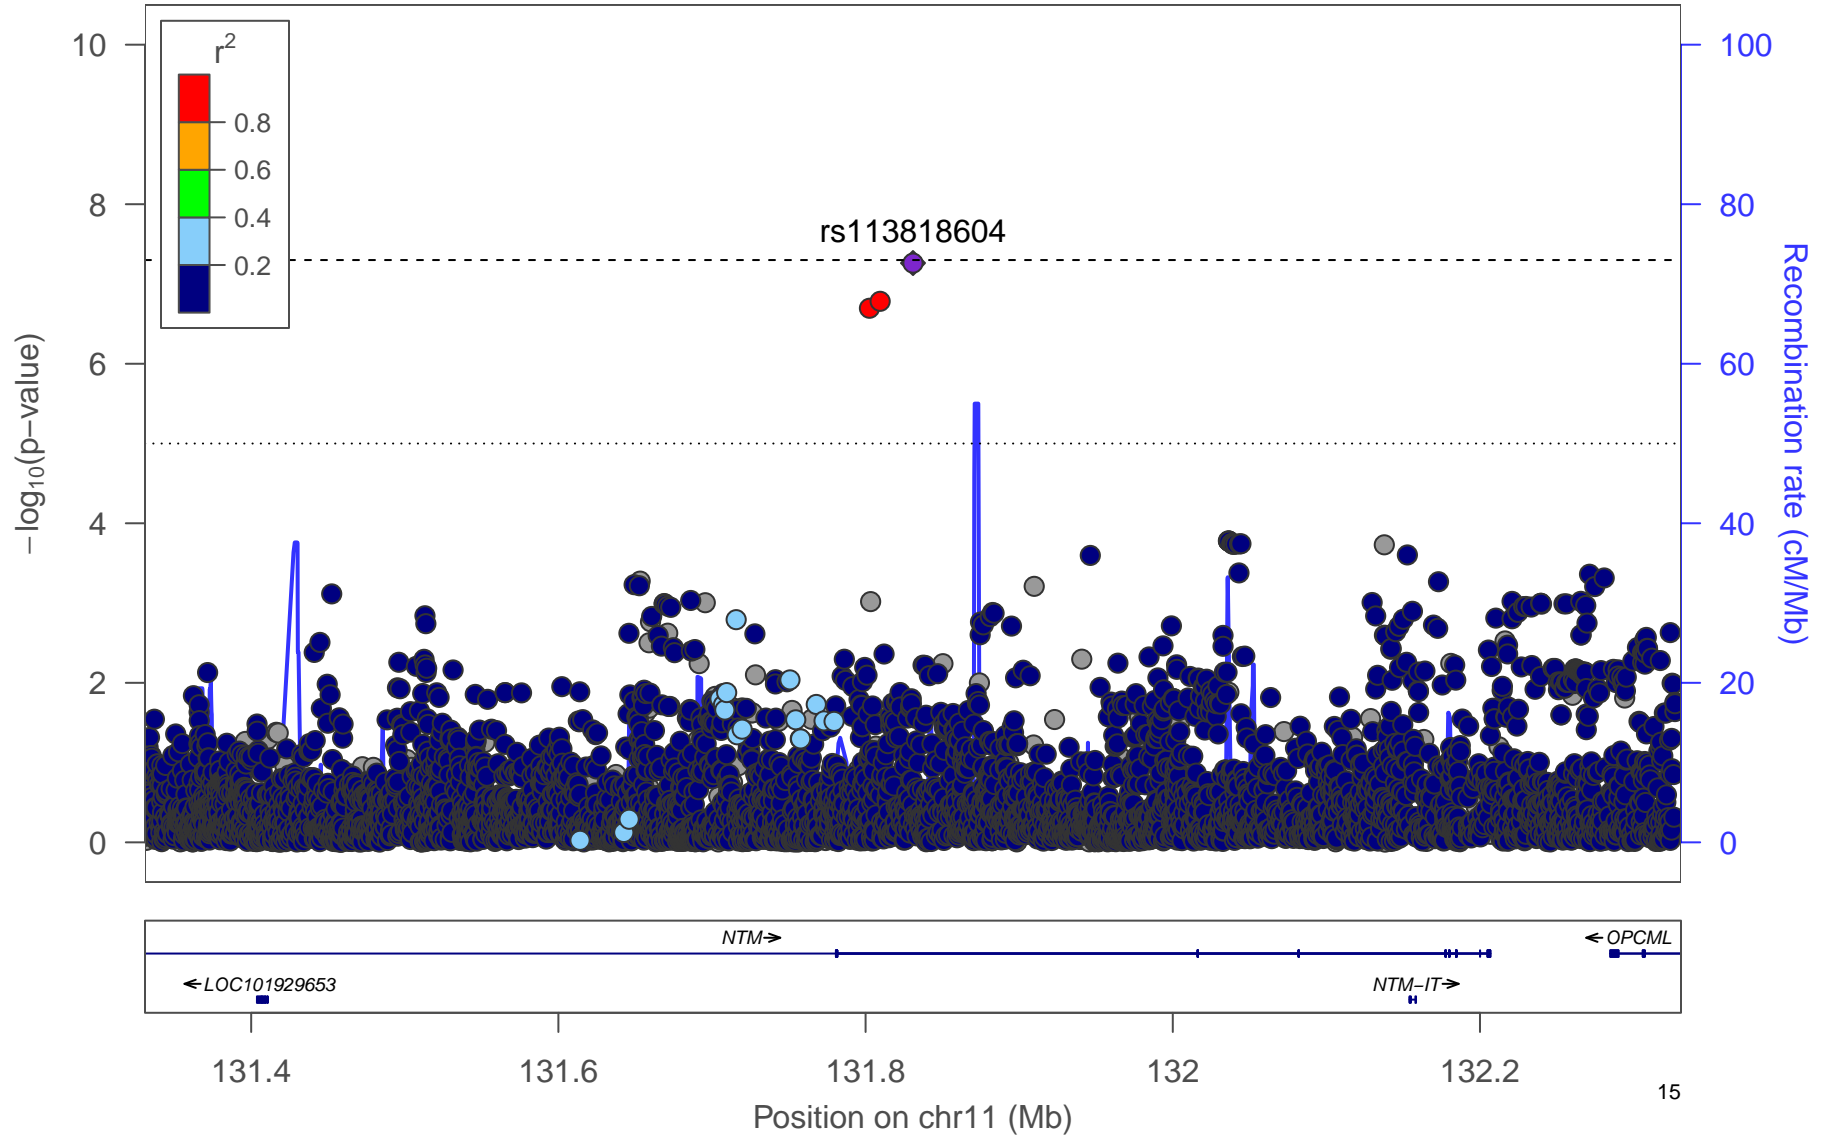

# f) WHRadjBMI Women

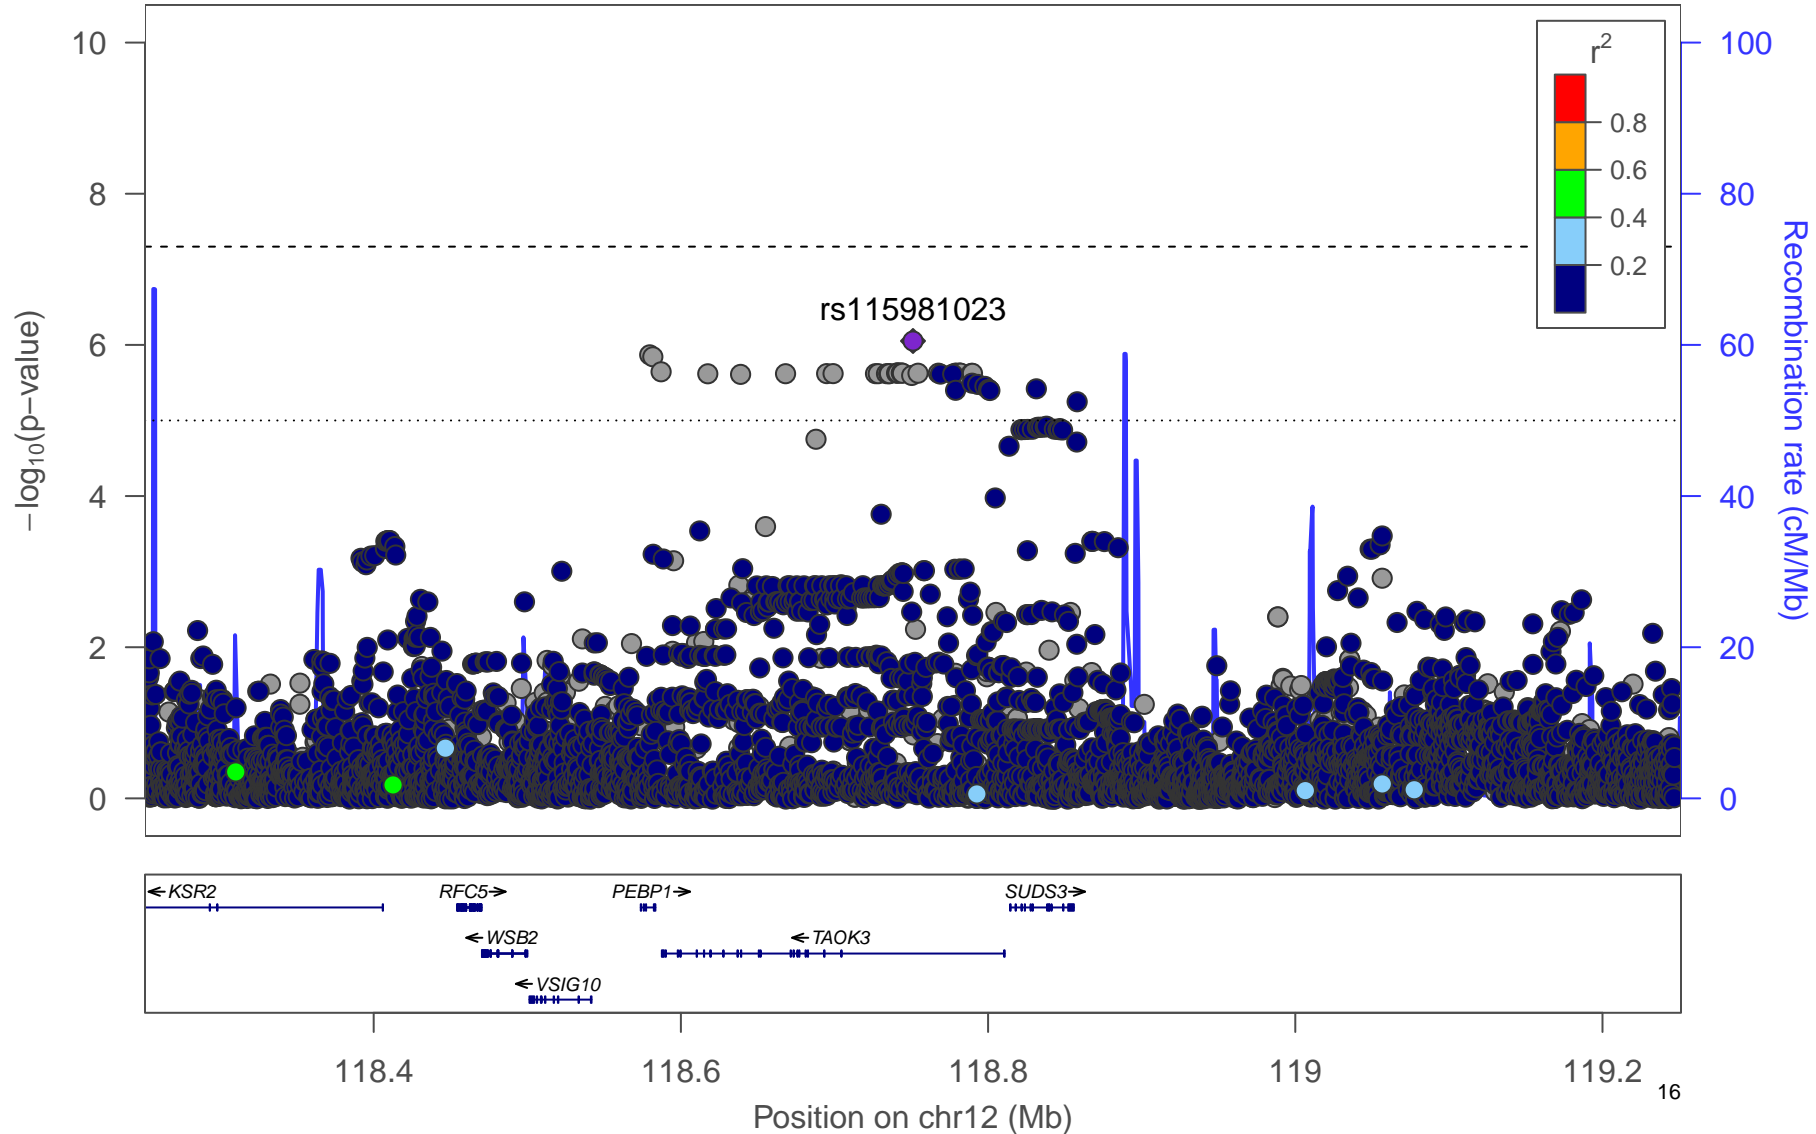



# g) WHRadjBMI Women

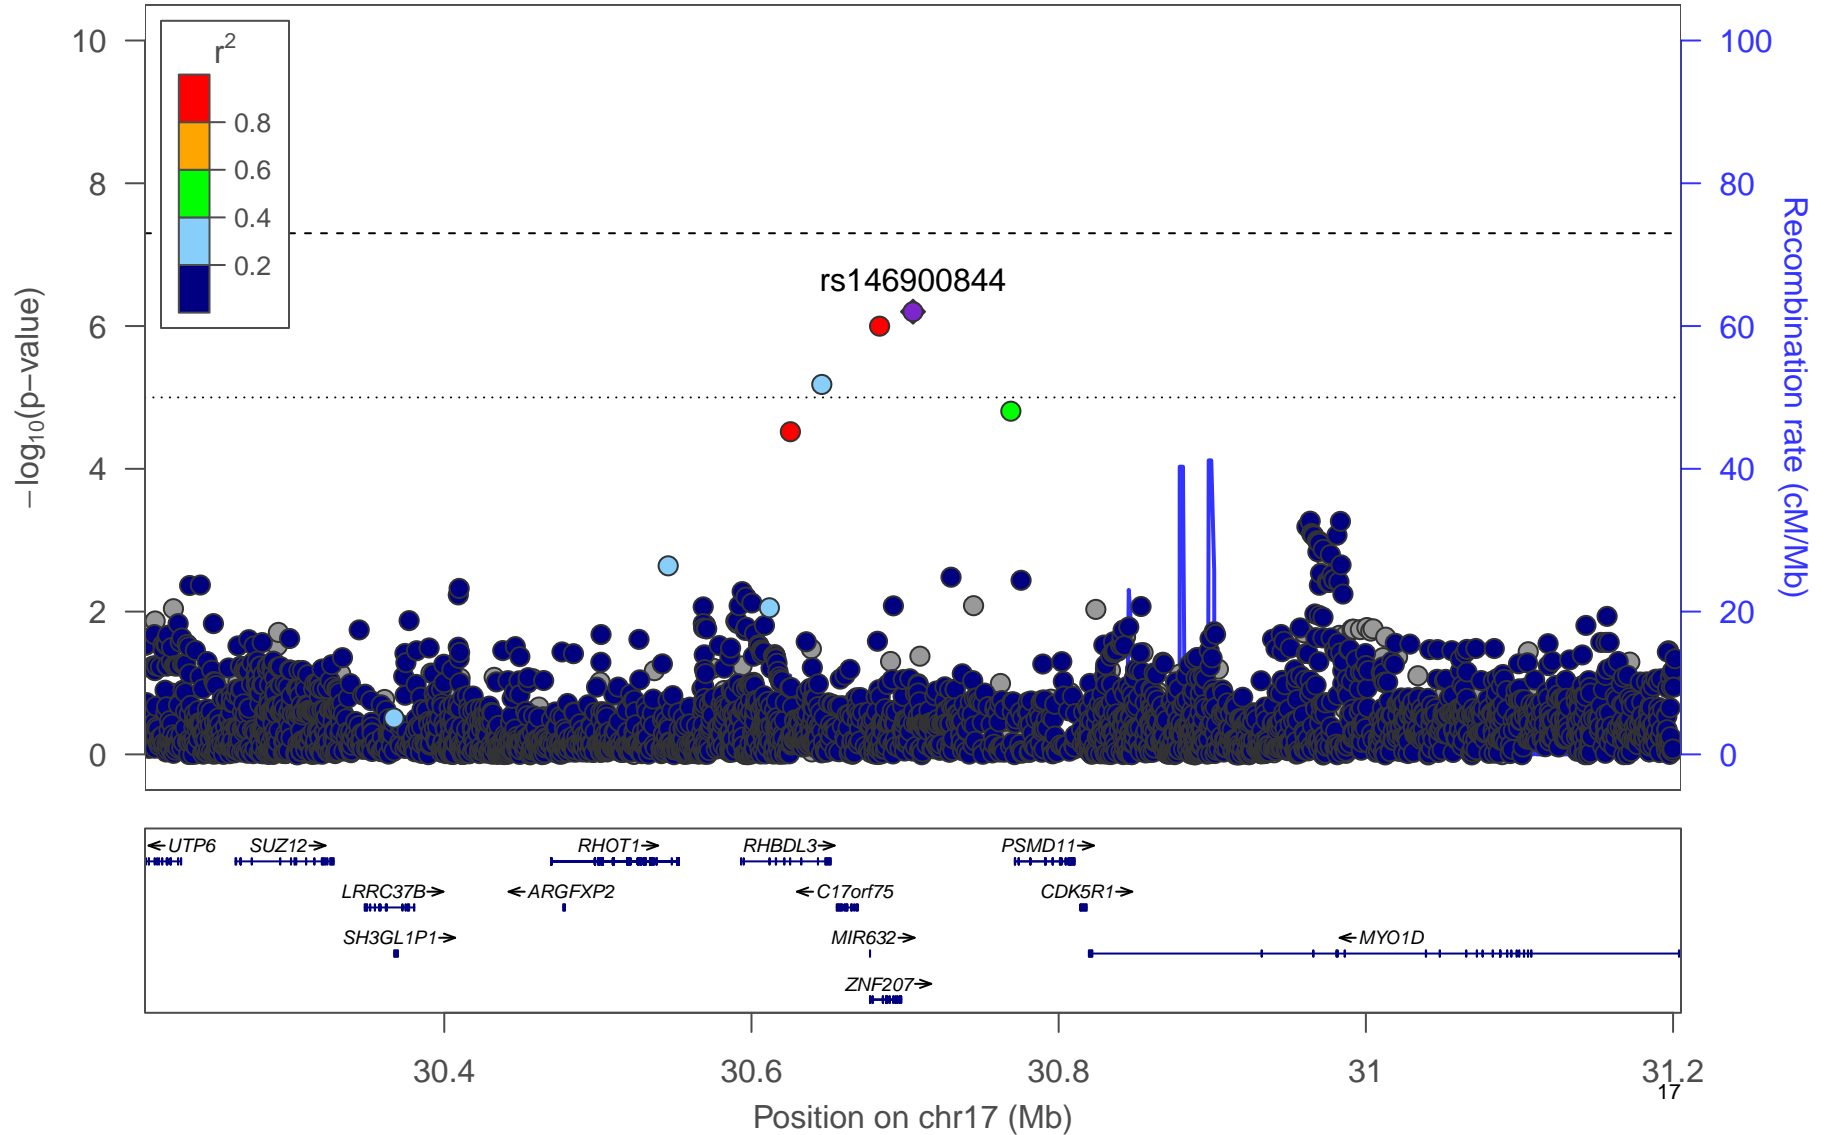

# h) WHRadjBMI Women

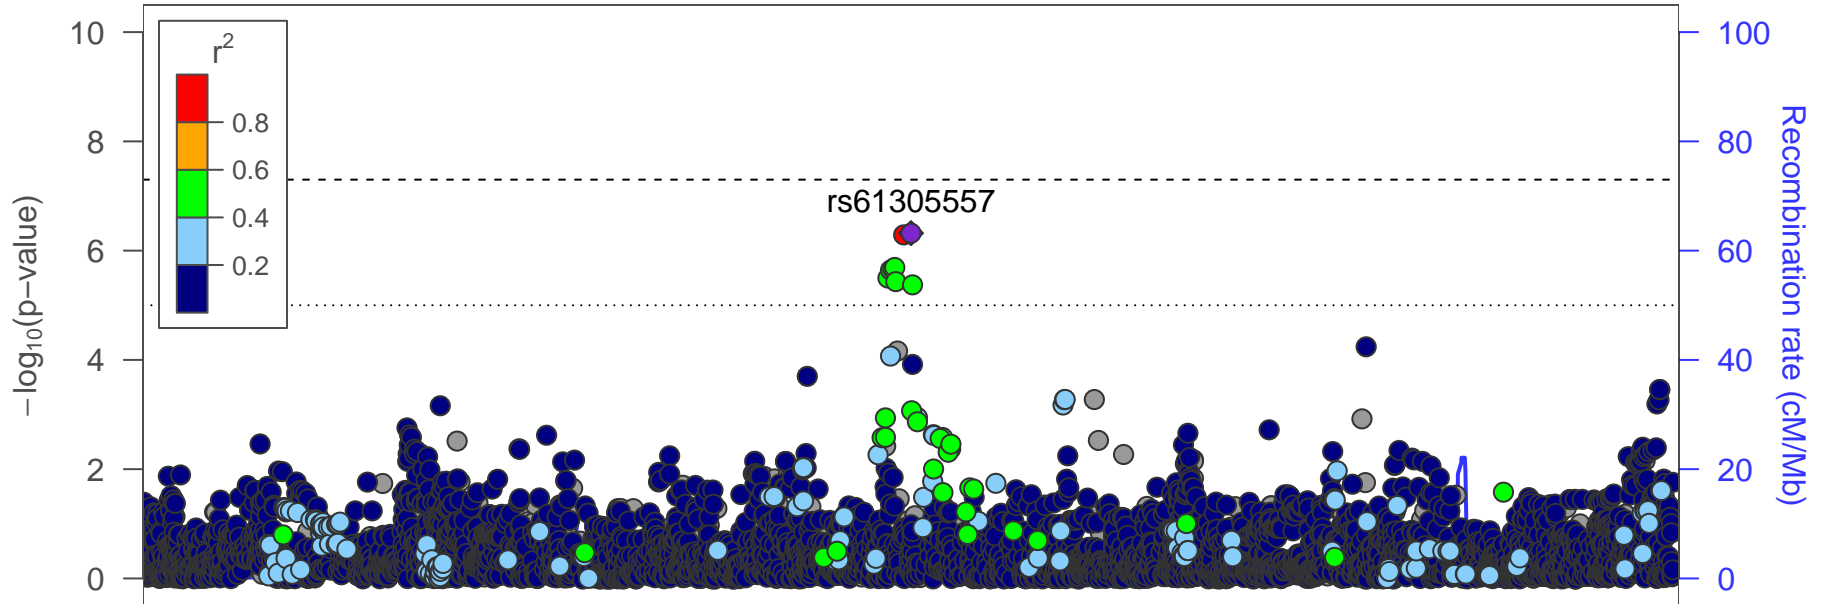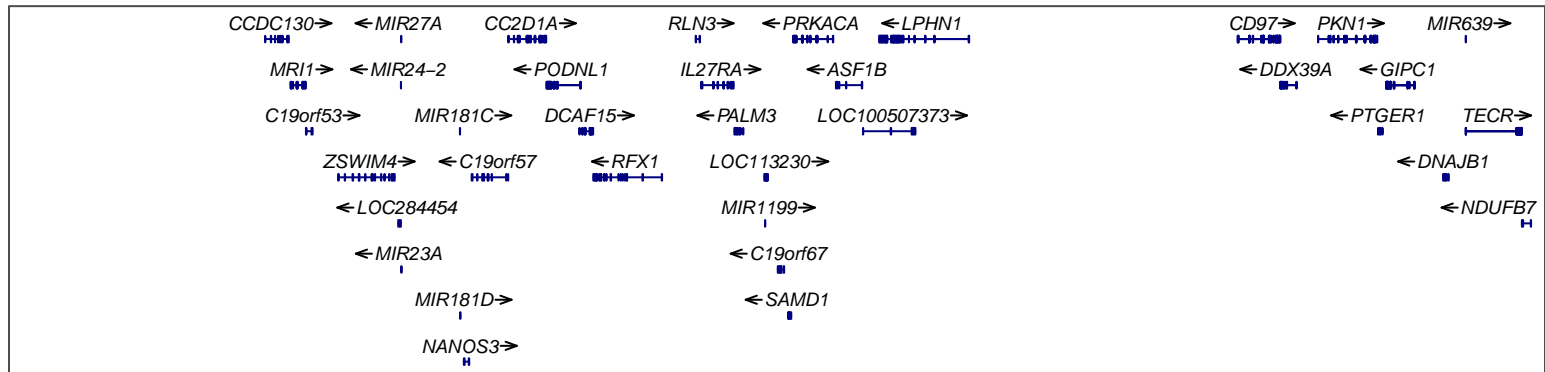

13.8

14

14.2

14.4

14.6

18

Position on chr19 (Mb)

**Supplementary Figure 5. Manhattan plot.** Manhattan plot of the men-only analysis for WHRadjBMI. All suggestively significant ( $P < 1 \times 10^{-6}$ ) variants are highlighted in orange if they are  $> 500$  Kb from any previously-reported WHRadjBMI associated variants. Previously reported loci ( $\pm 500$  Kb) are highlighted in blue if any variant in the locus reached suggestive significance. All suggestively significant loci that meet our criteria for replication are annotated with the closest gene. † Replicated in African American meta-analysis. ‡ Replicated in Hispanic/Latino meta-analysis. ¥ Replicated in European American meta-analysis.

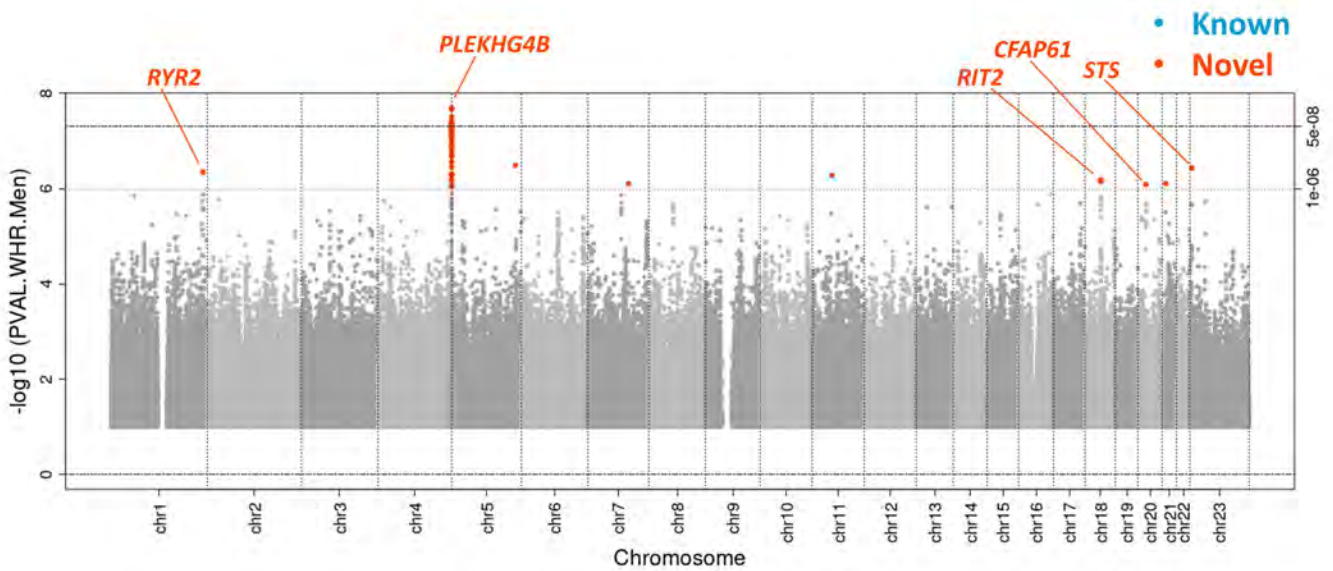

**Supplementary Figure 6. Locus Zoom Plots.** Regional association plots for suggestively significant loci in the HCHS/SOL WHRadjBMI men-only analysis. The plots appear in chromosome:position order. Dot color reflects  $R^2$  calculated from the 1000 Genomes AMR reference dataset. Point symbols represent variant functional classifications: a) rs12032174, *RYR2*; b) rs10475310, *PLEKHG4B*; c) rs16977373, *RIT2*; d) rs721424, *CFAP61*; e) rs148213302, *STS*.

# a) WHRadjBMI Men

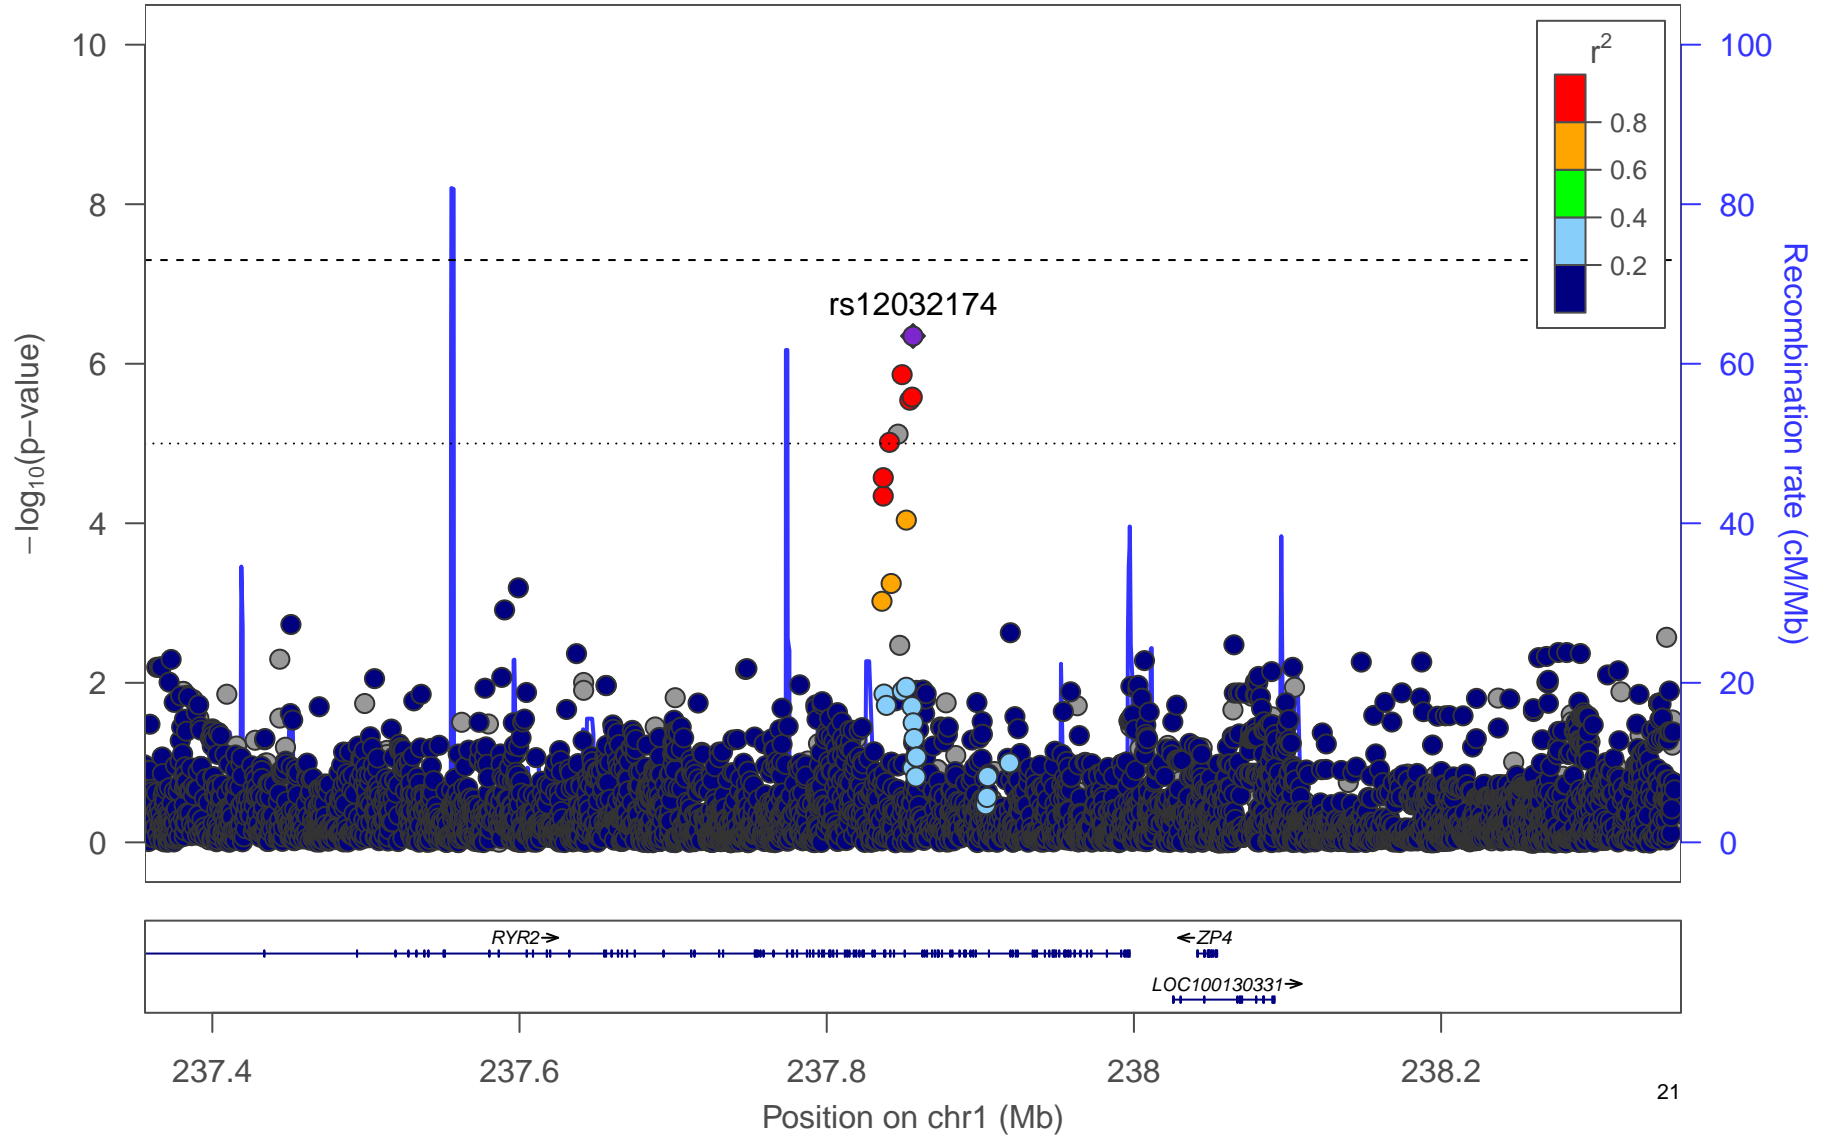

## b) WHRadjBMI Men

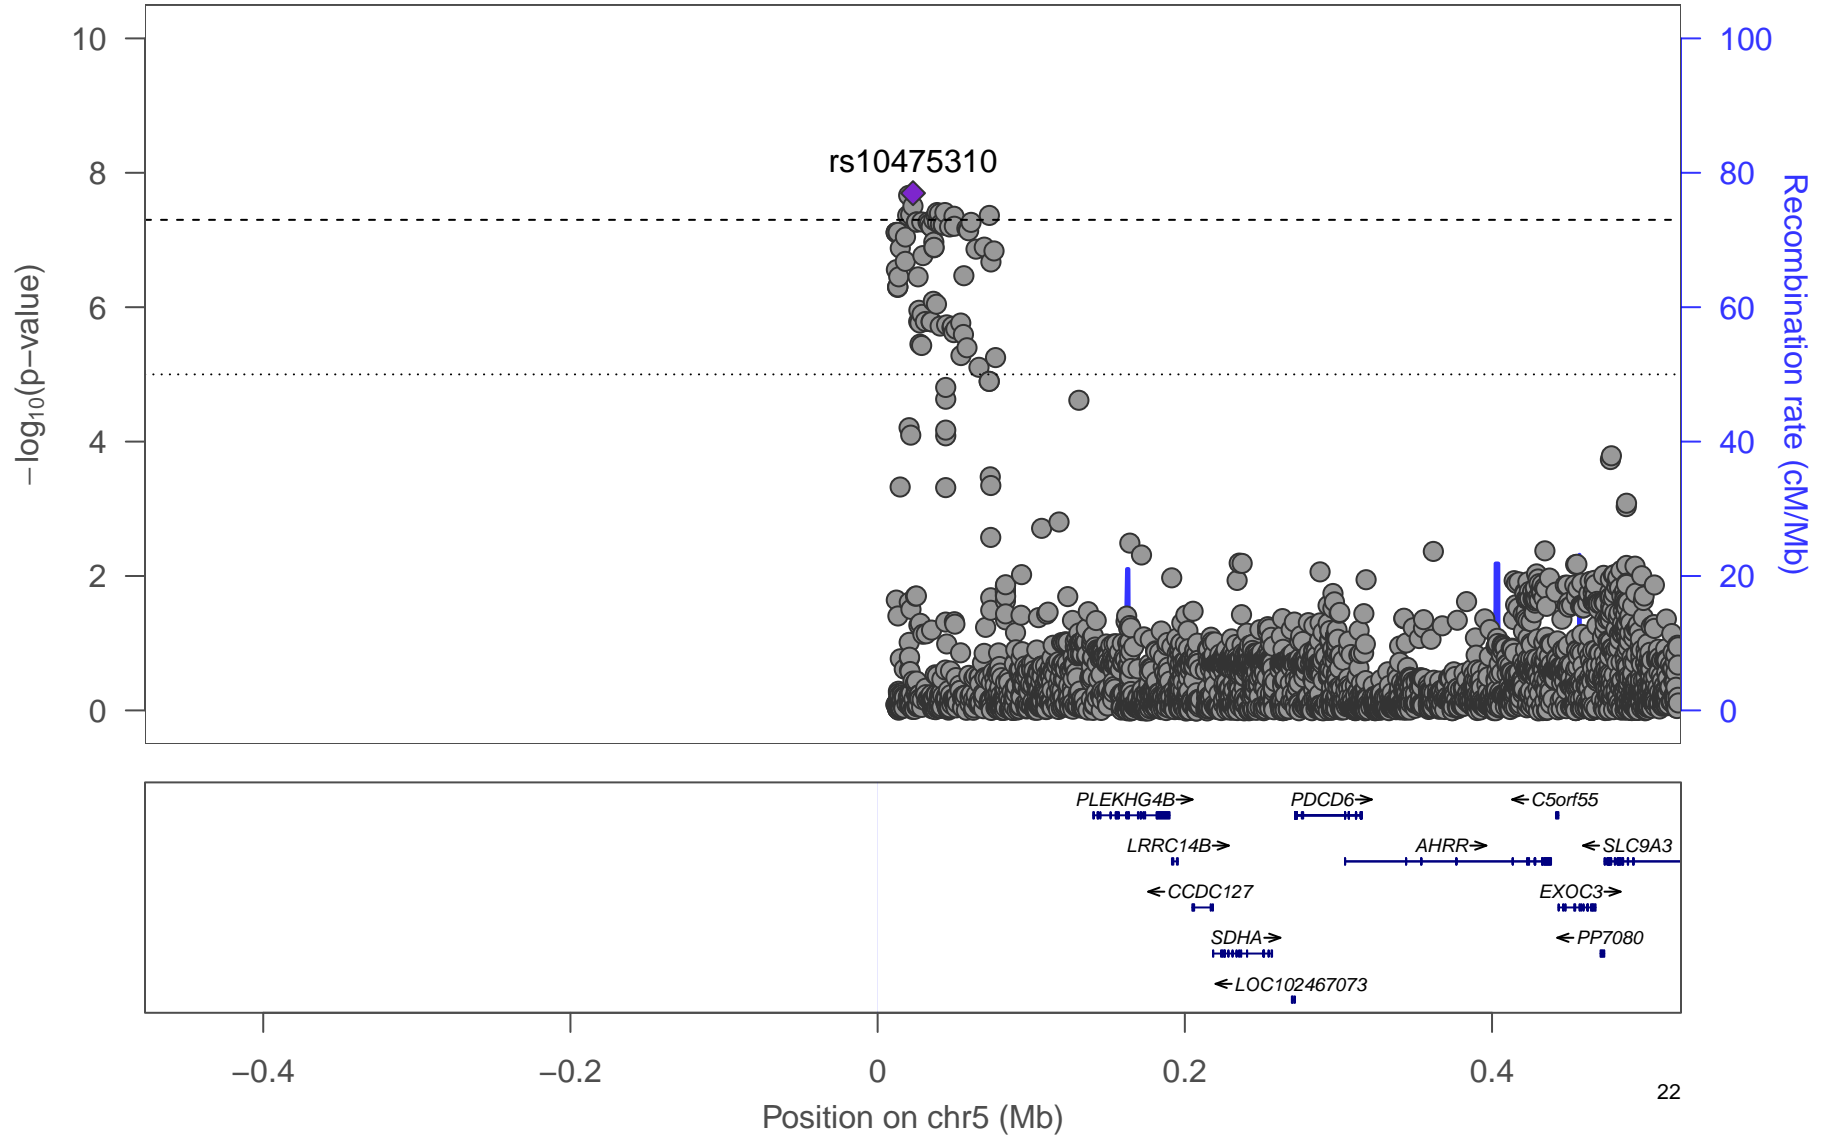

### c) WHRadjBMI Men

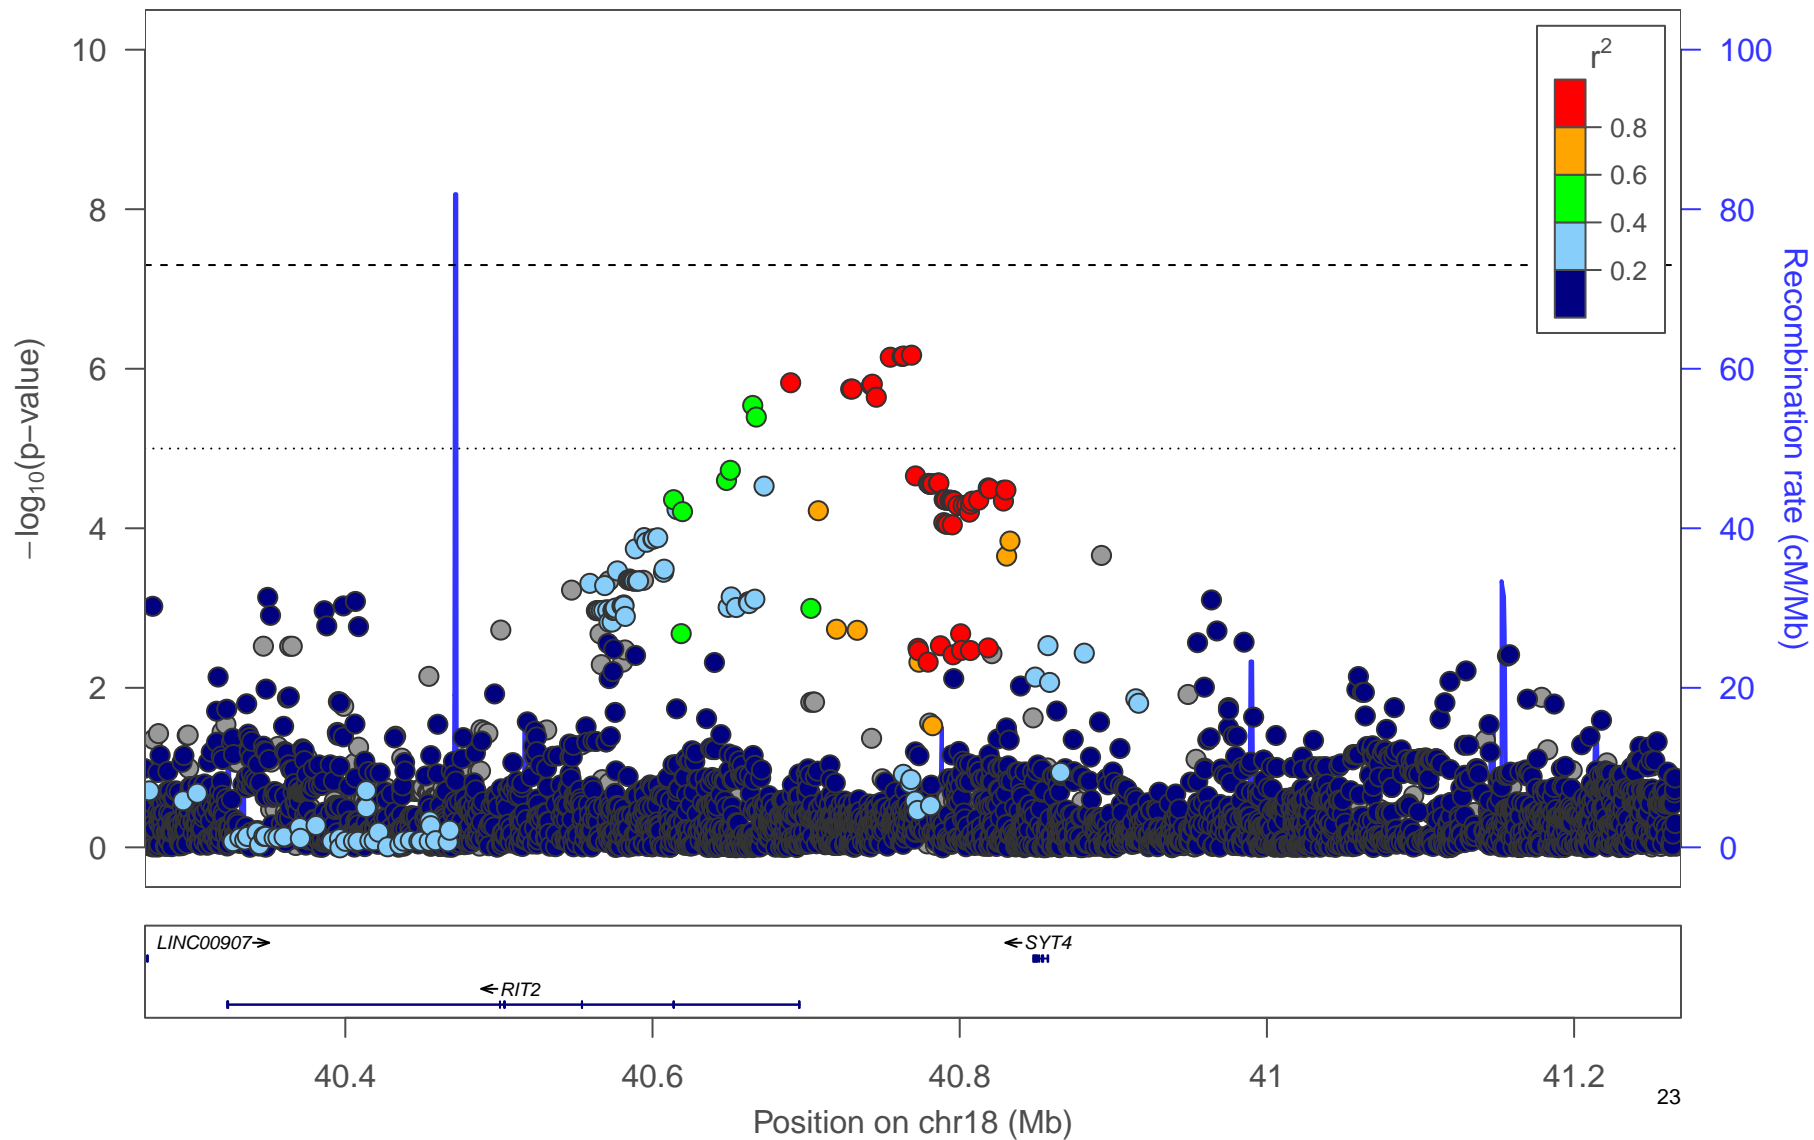

# d) WHRadjBMI Men

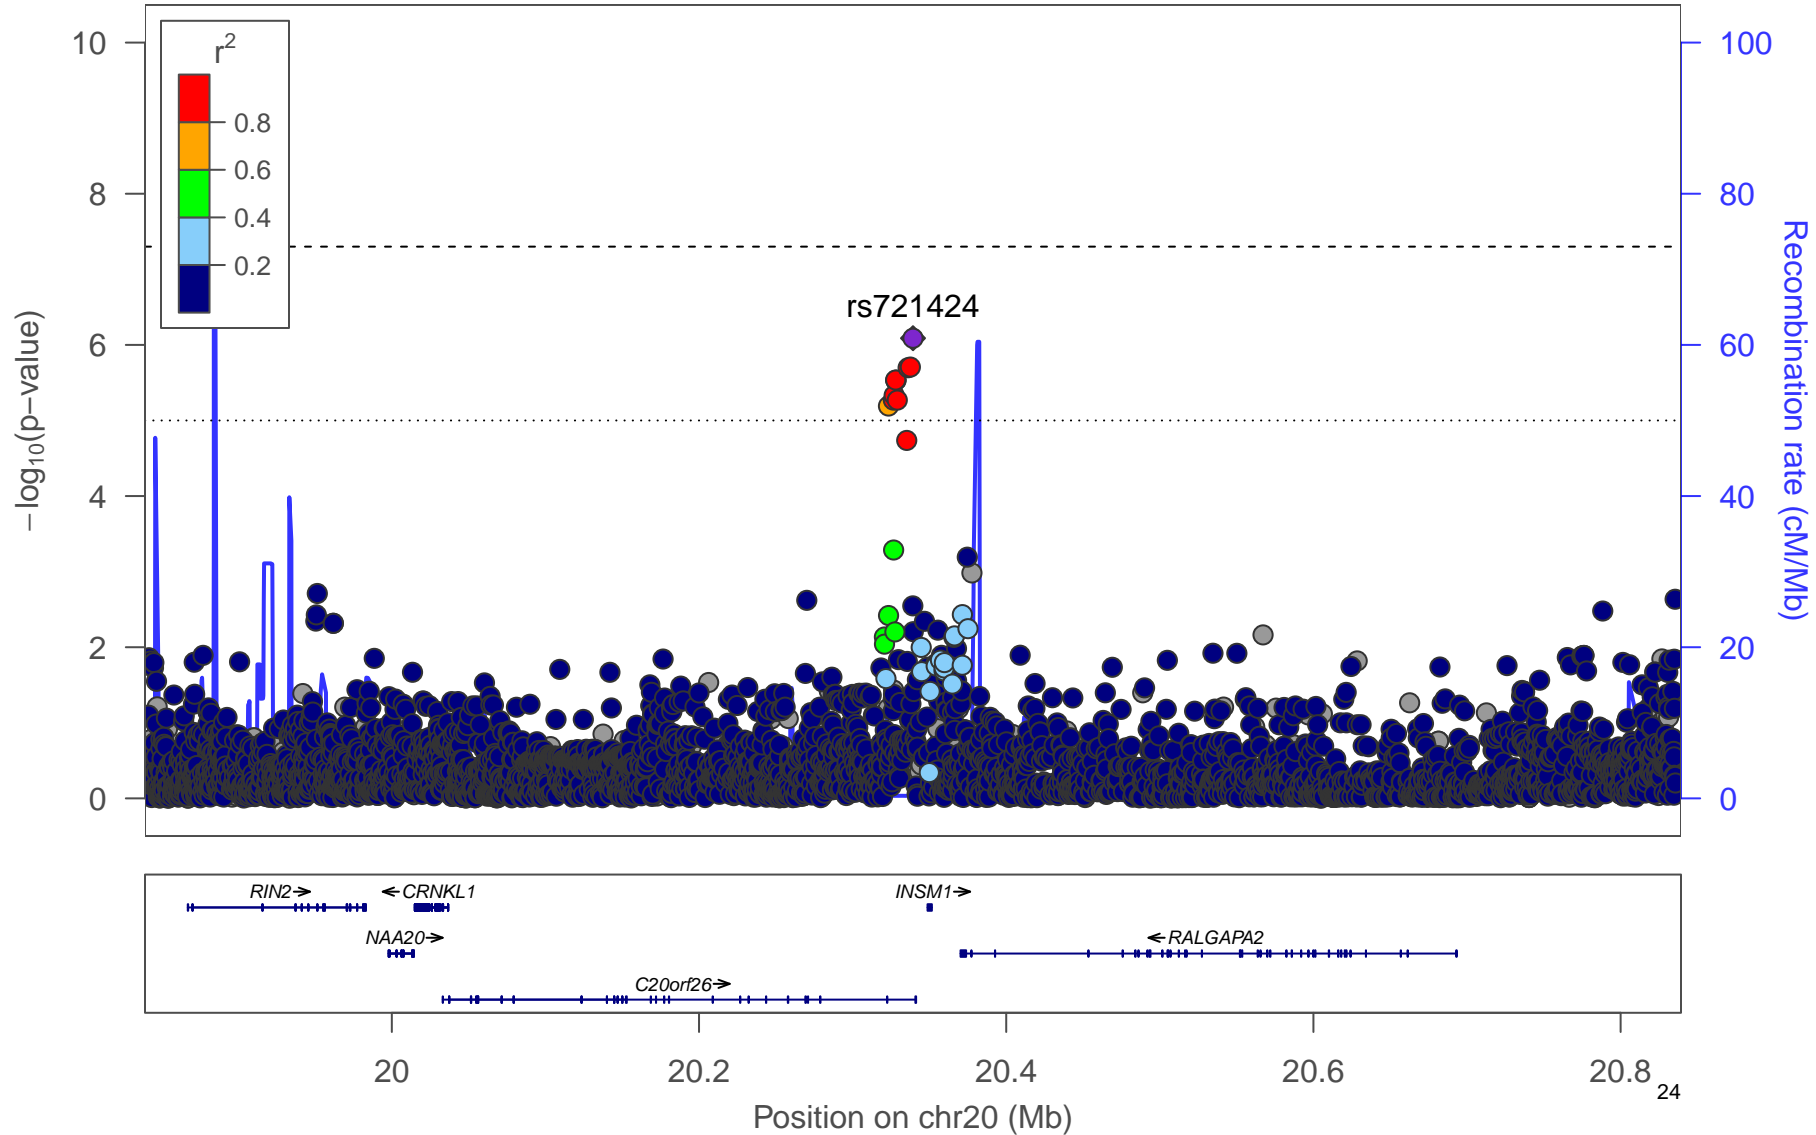



# e) WHRadjBMI Men

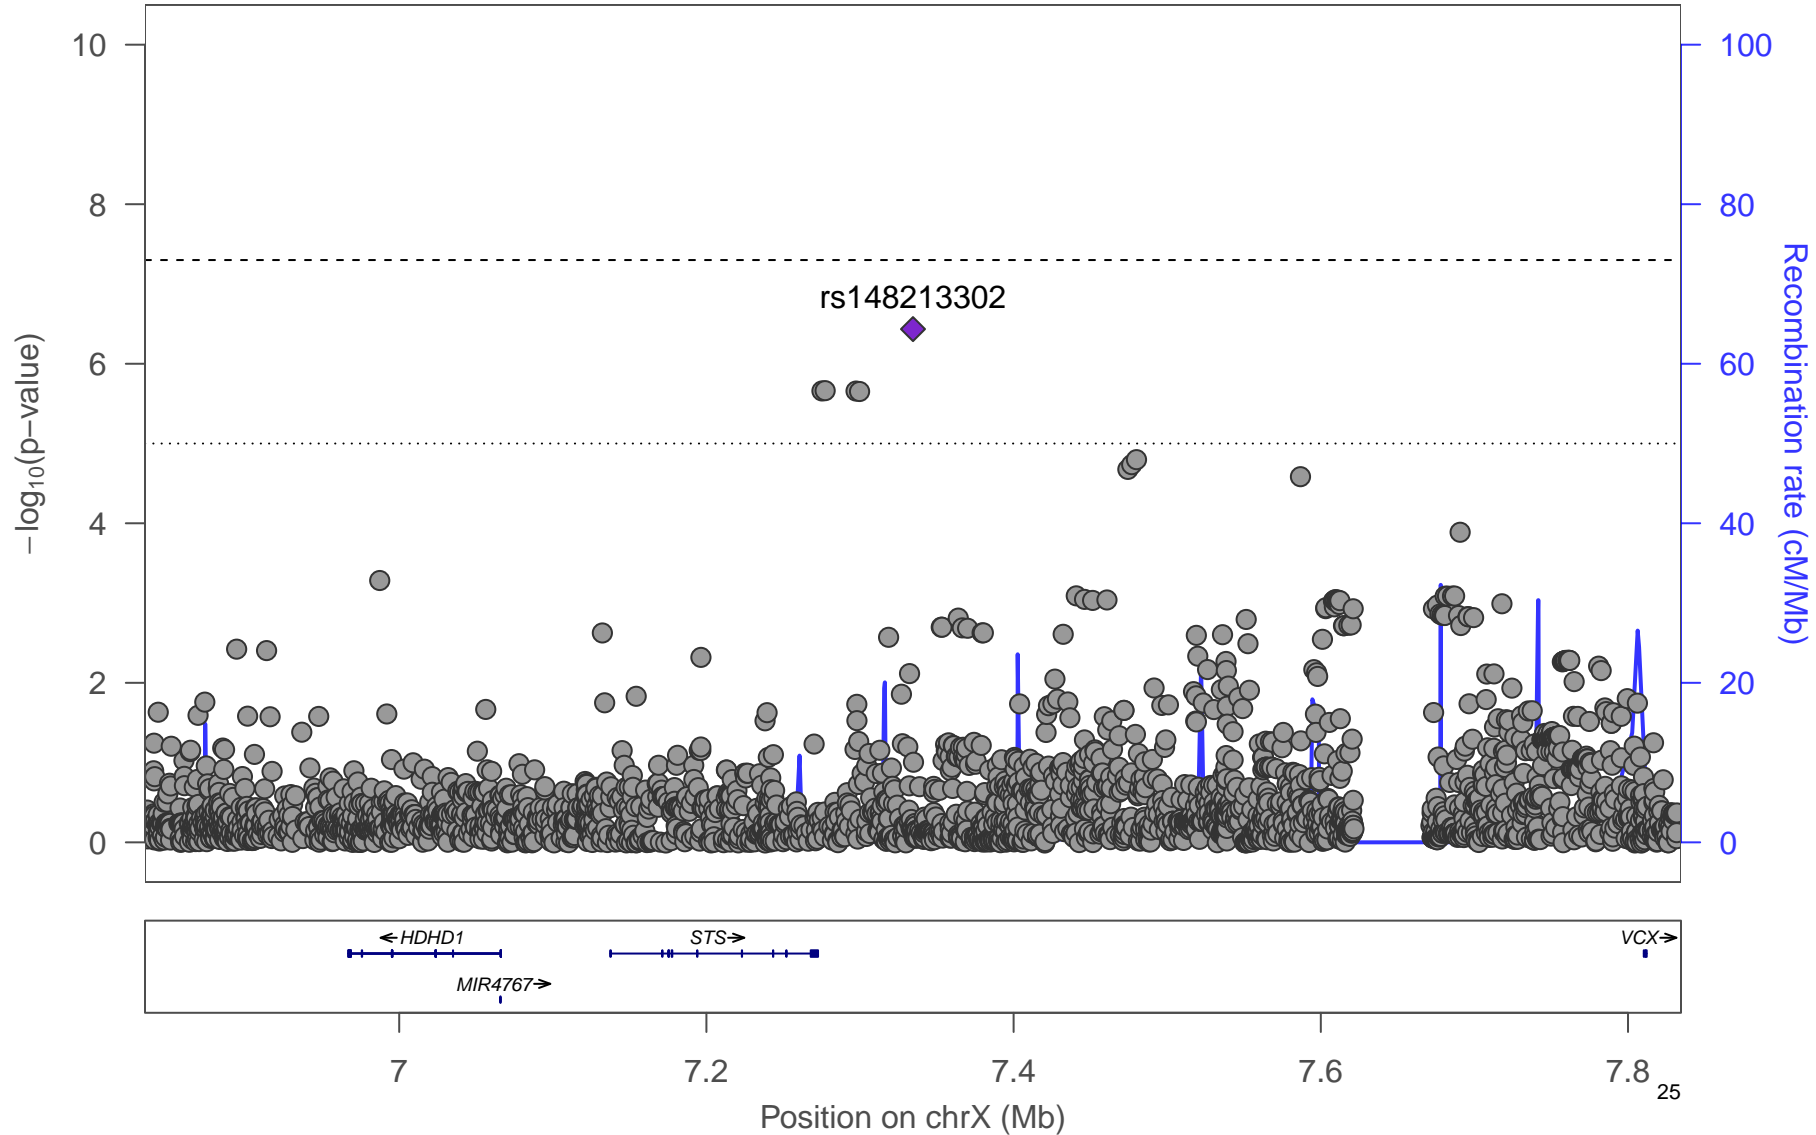

**Supplementary Figure 7. QQ Plots.** QQ Plots for WHRadjBMI, including sexes-combined (black), women-only (orange), men-only (blue).

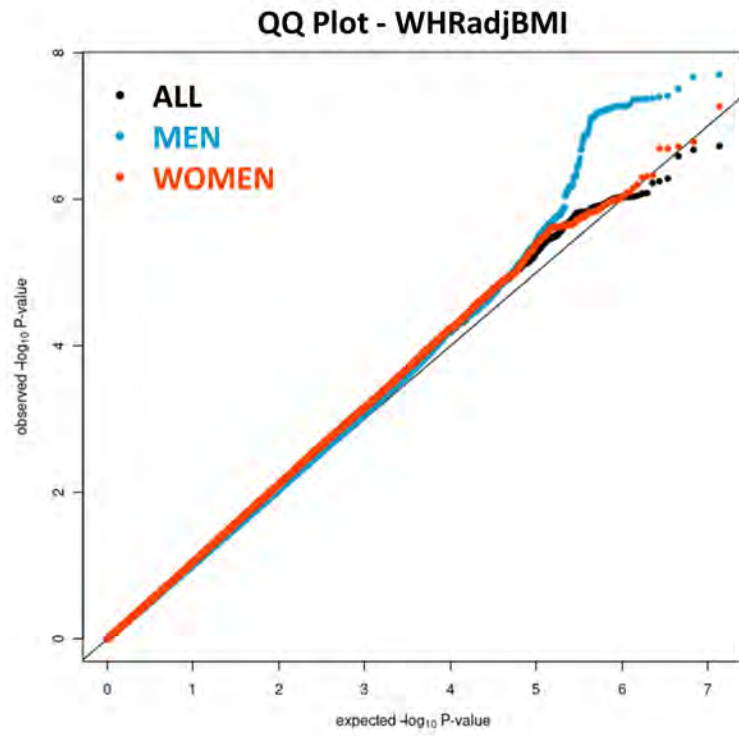

**Supplementary Figure 8. Manhattan plot.** Manhattan plot of the sexes-combined analysis for WCadjBMI. All suggestively significant ( $P < 1 \times 10^{-6}$ ) variants are highlighted in orange if they are >500 Kb from any previously-reported WCadjBMI associated variants. Previously reported loci ( $\pm 500$  Kb) are highlighted in blue if any variant in the locus reached suggestive significance. All suggestively significant loci that meet our criteria for replication are annotated with the closest gene. † Replicated in African American meta-analysis. ‡ Replicated in Hispanic/Latino meta-analysis. ¥ Replicated in European American meta-analysis.

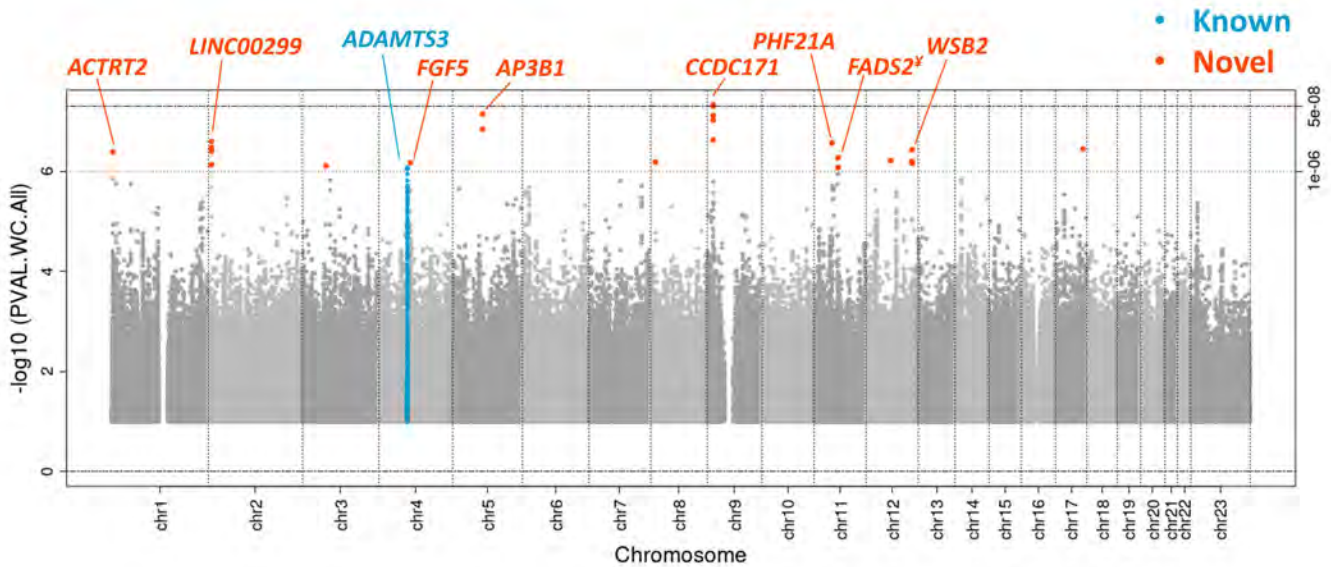

**Supplementary Figure 9. Locus Zoom Plots.** Regional association plots for suggestively significant loci in the HCHS/SOL WCadjBMI sexes-combined analysis. The plots appear in chromosome:position order. Dot color reflects  $R^2$  calculated from the 1000 Genomes AMR reference dataset. Point symbols represent variant functional classifications: a) rs77993329, *ACTRT2*; b) rs138819965, *LINC00299*; c) rs77319470, *ADAMTS3*; d) rs921999, *FGF5*; e) rs112404395, *AP3B1*; f) rs77264633, *CCDC171*; g) rs184067184, *PHF21A*; h) rs3168072, *FADS2*; i) rs60260780, *WSB2*.

# a) WCadjBMI All

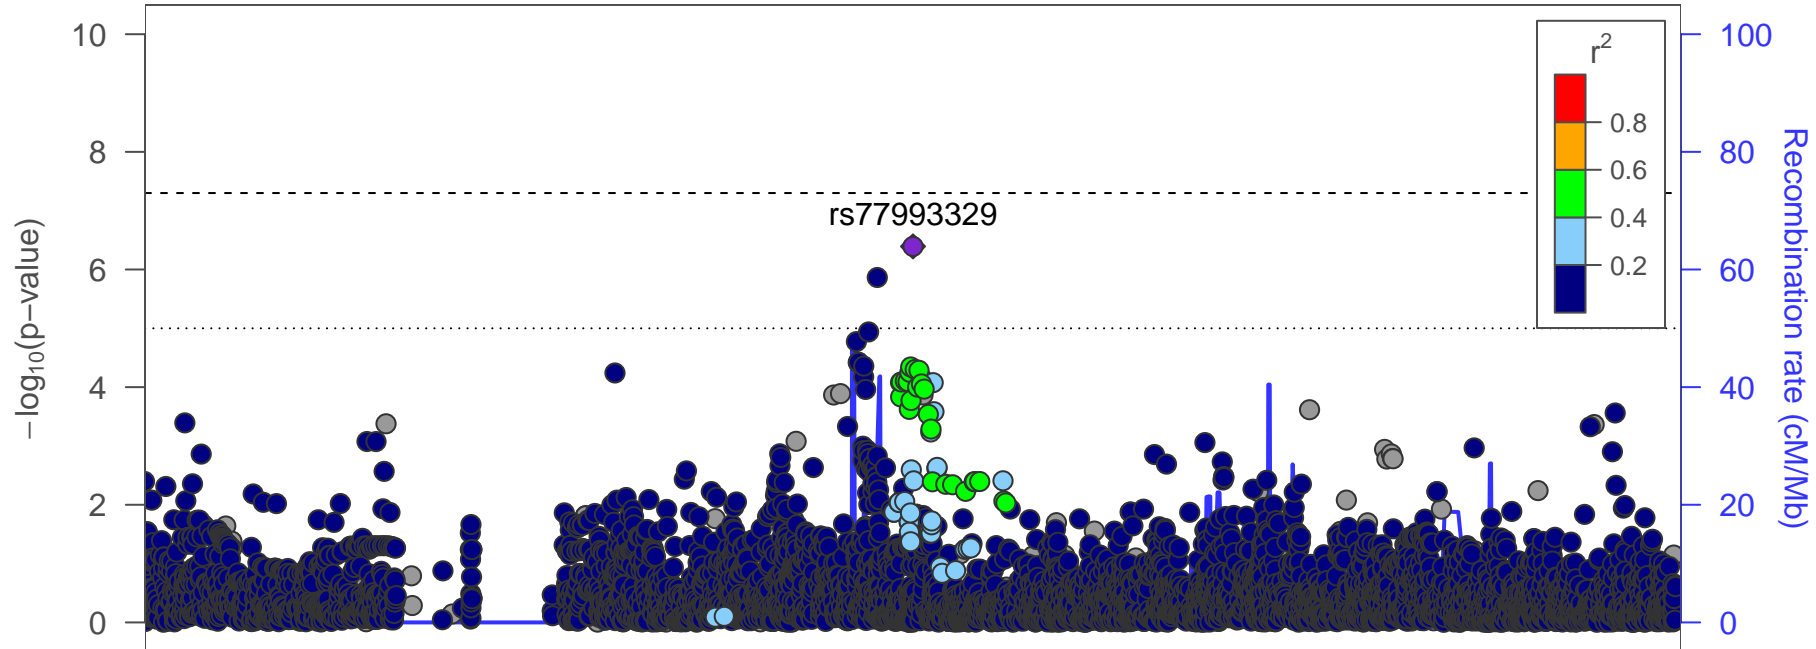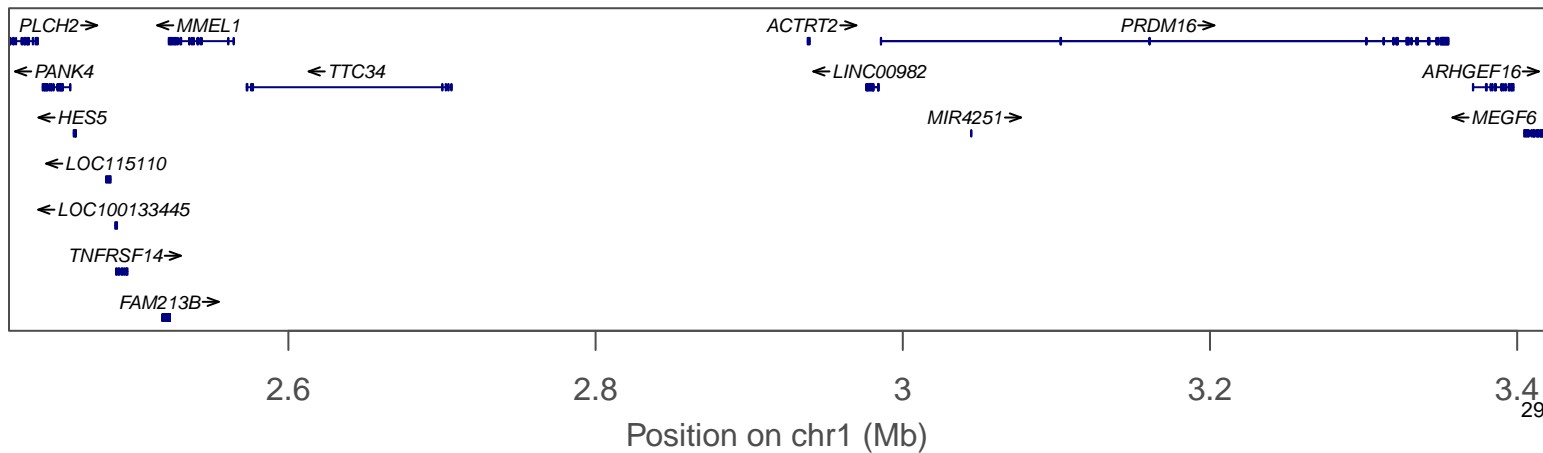

## b) WCadjBMI All

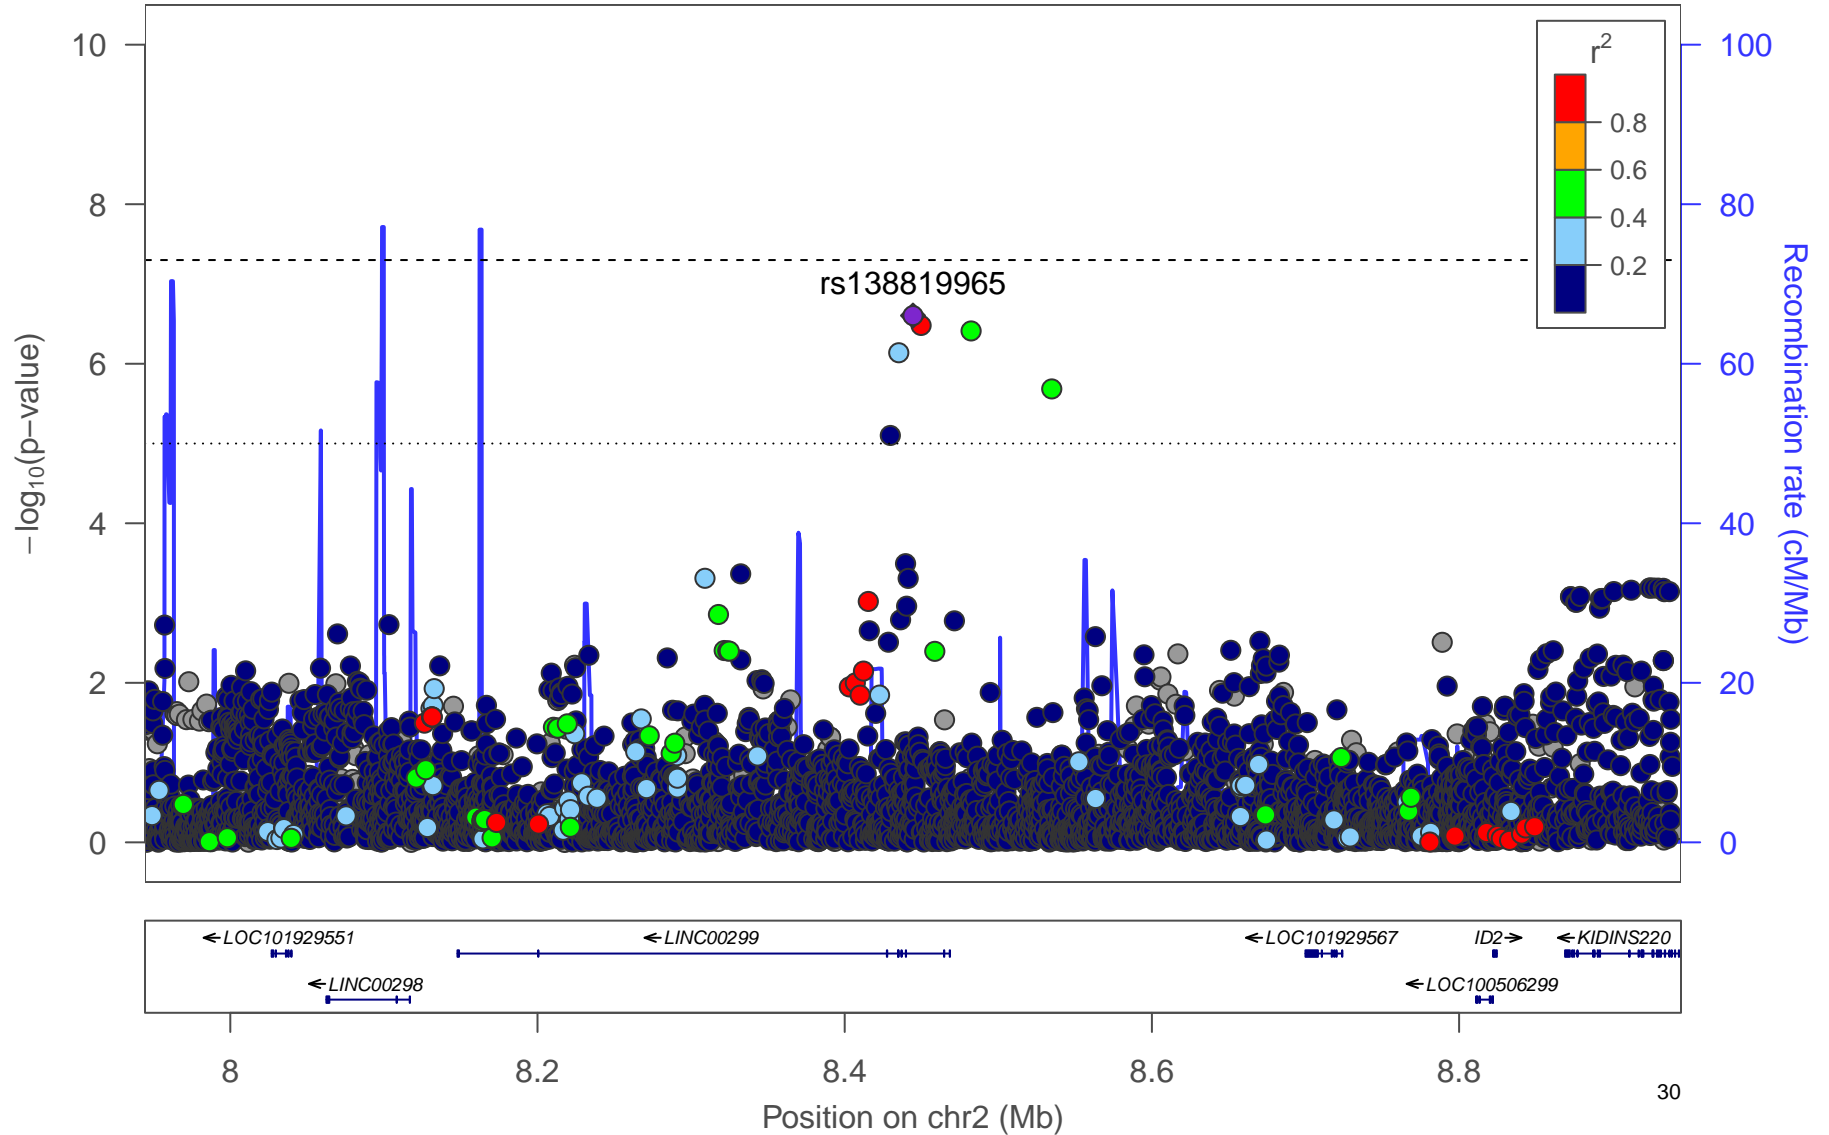

# c) WCadjBMI All

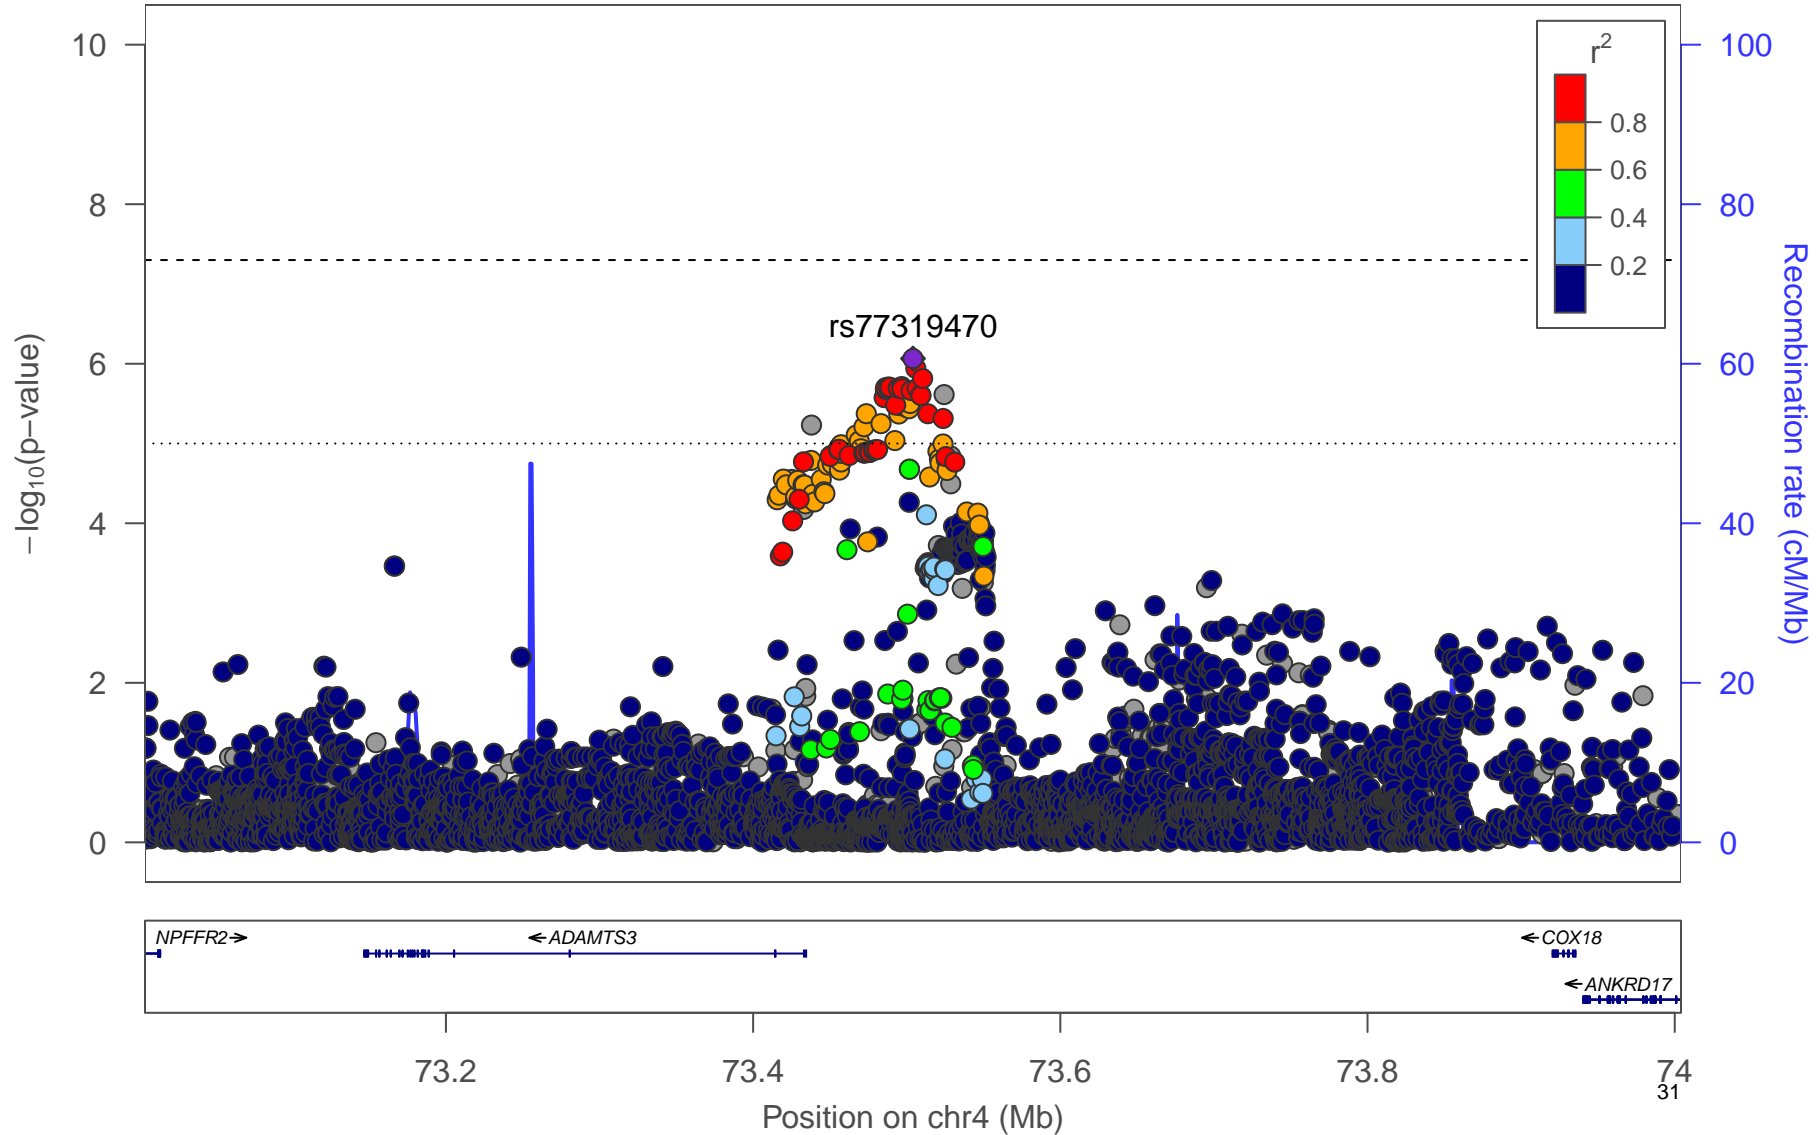

# d) WCadjBMI All

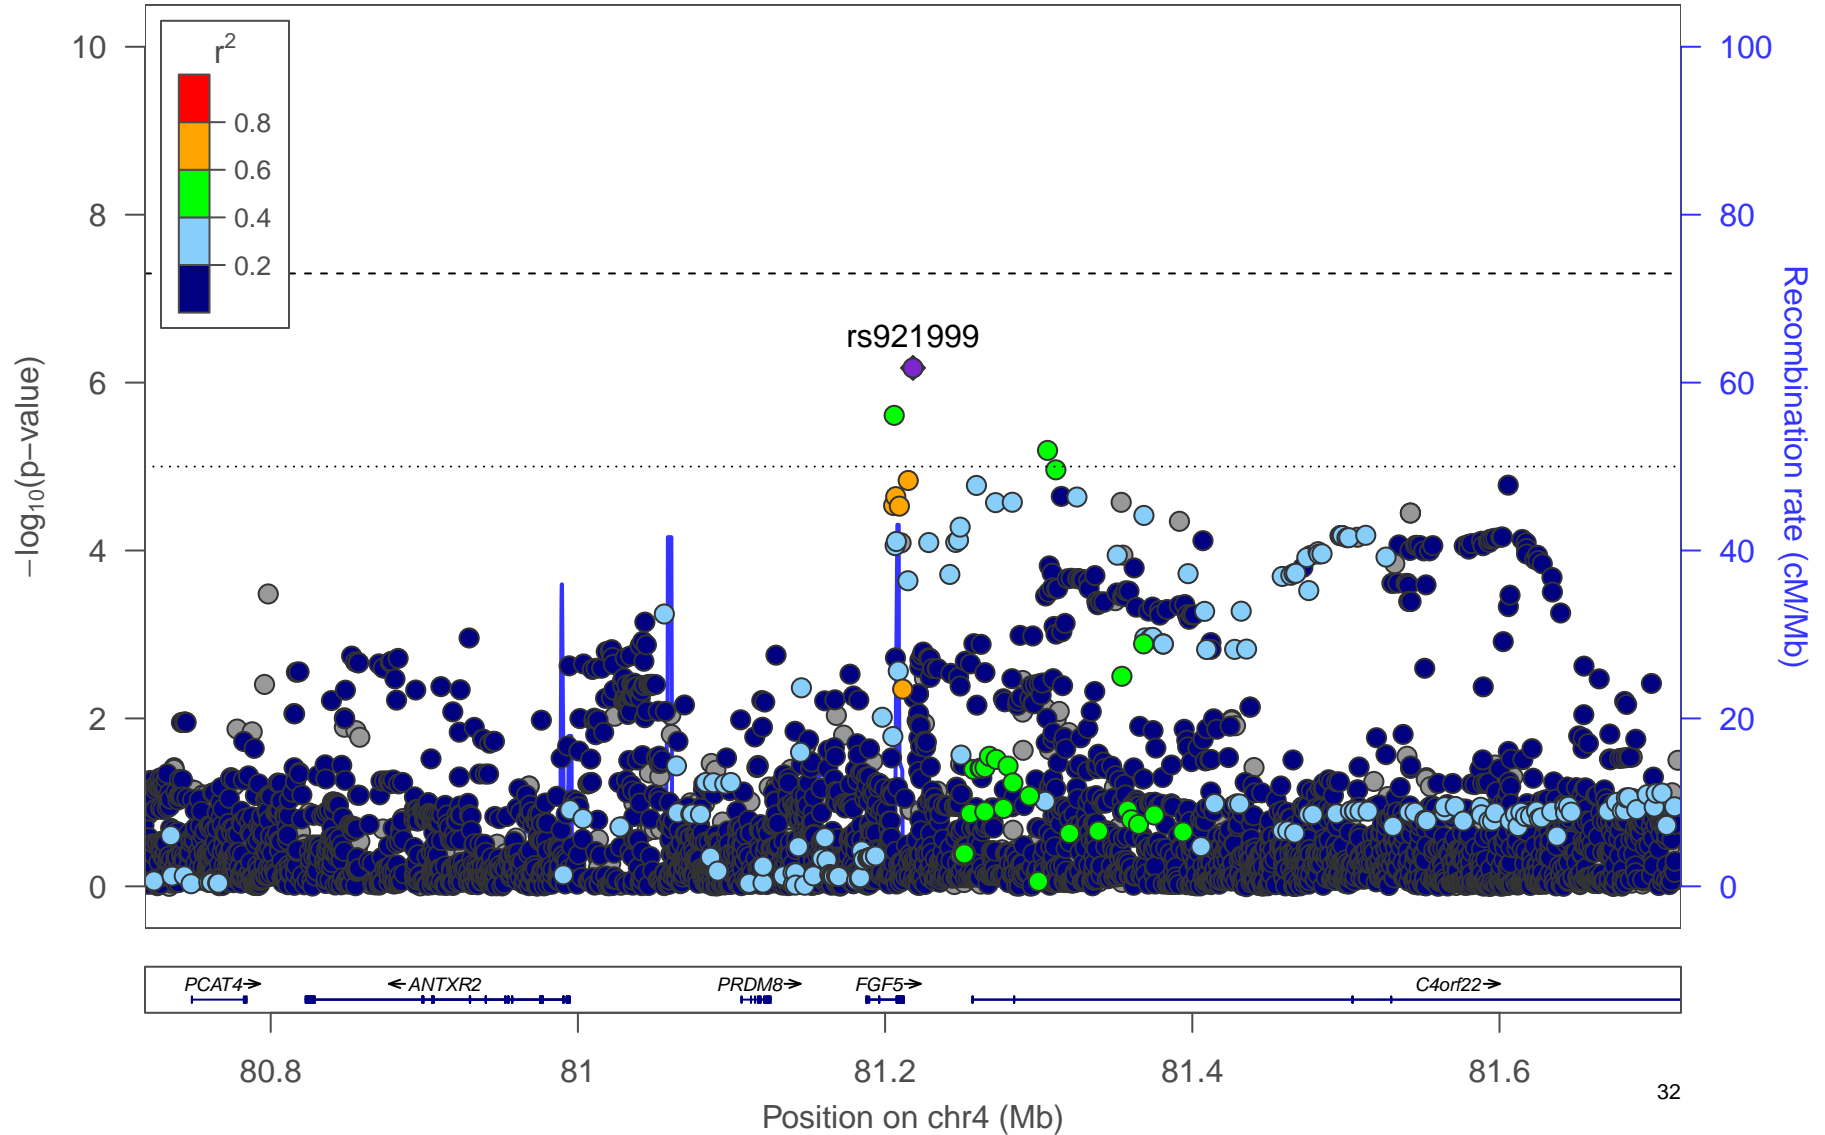



# e) WCadjBMI All

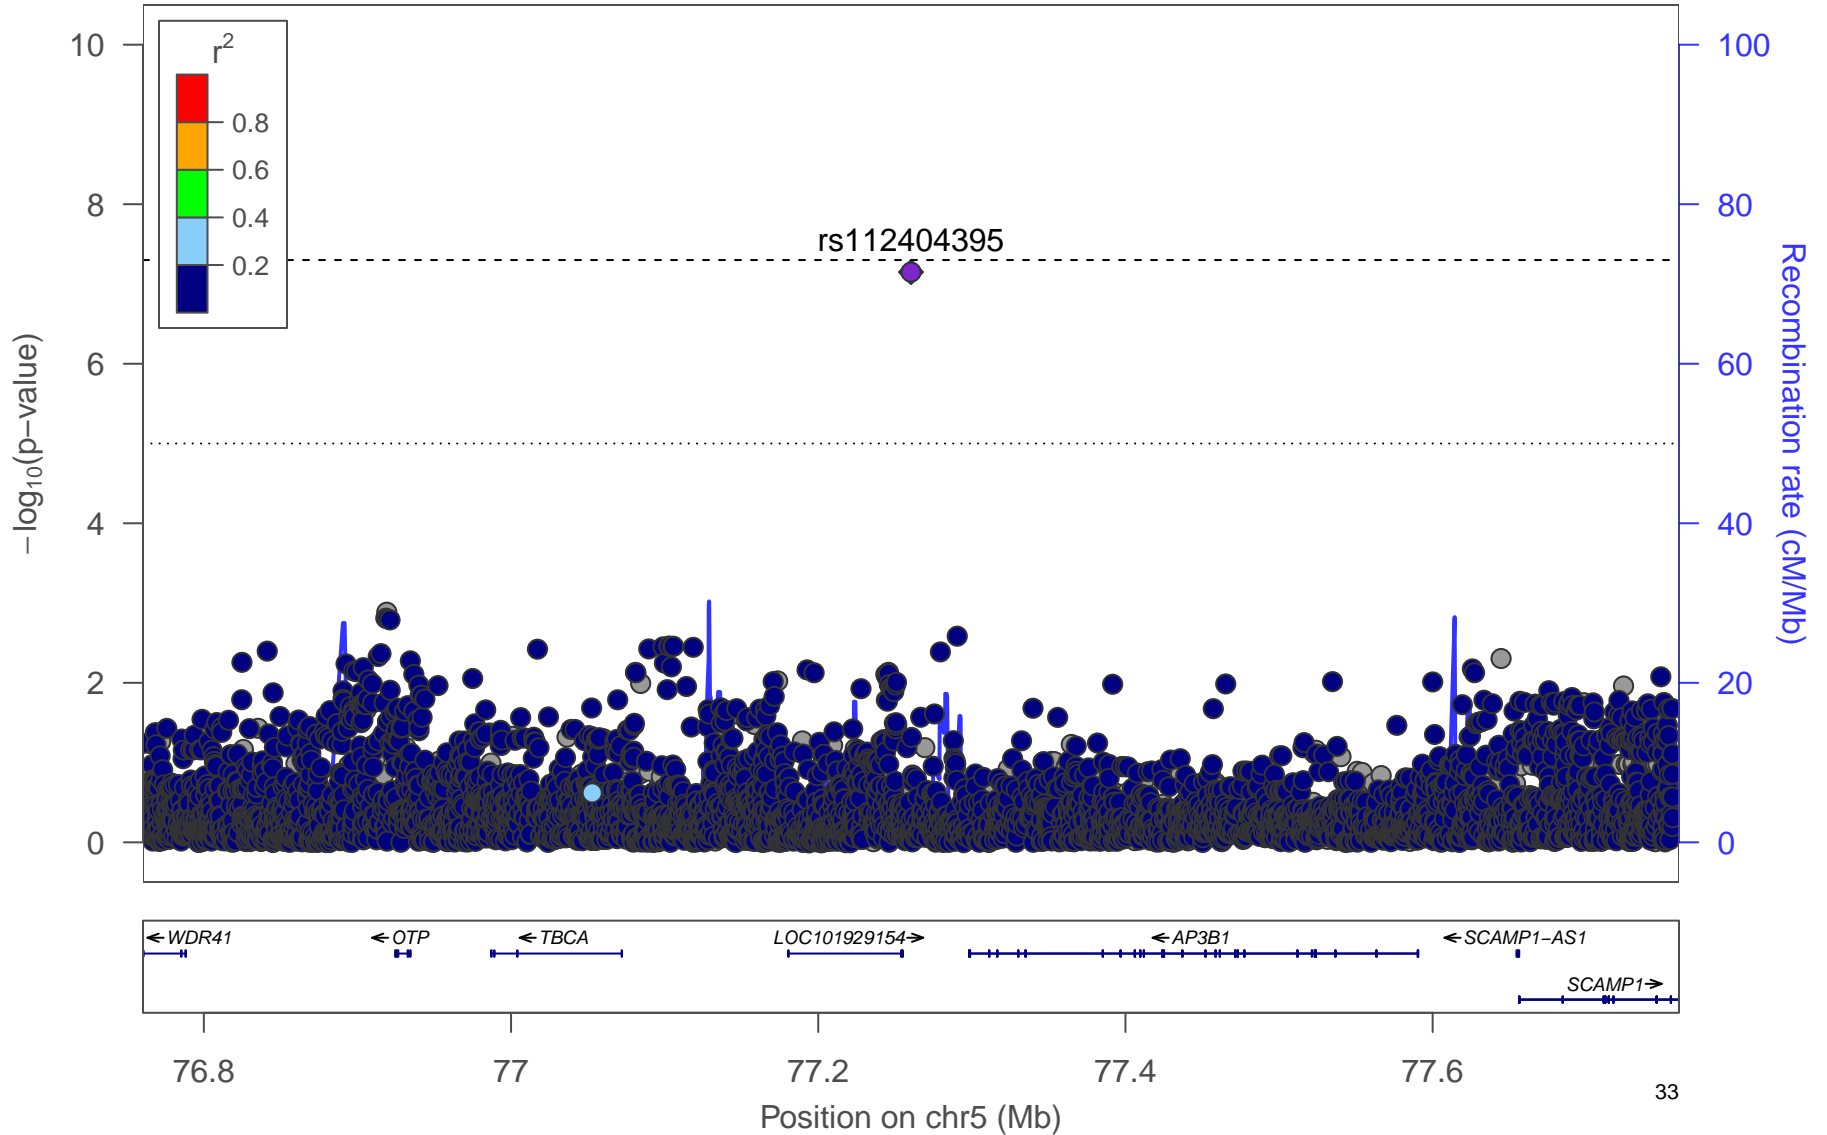

# f) WCadjBMI All

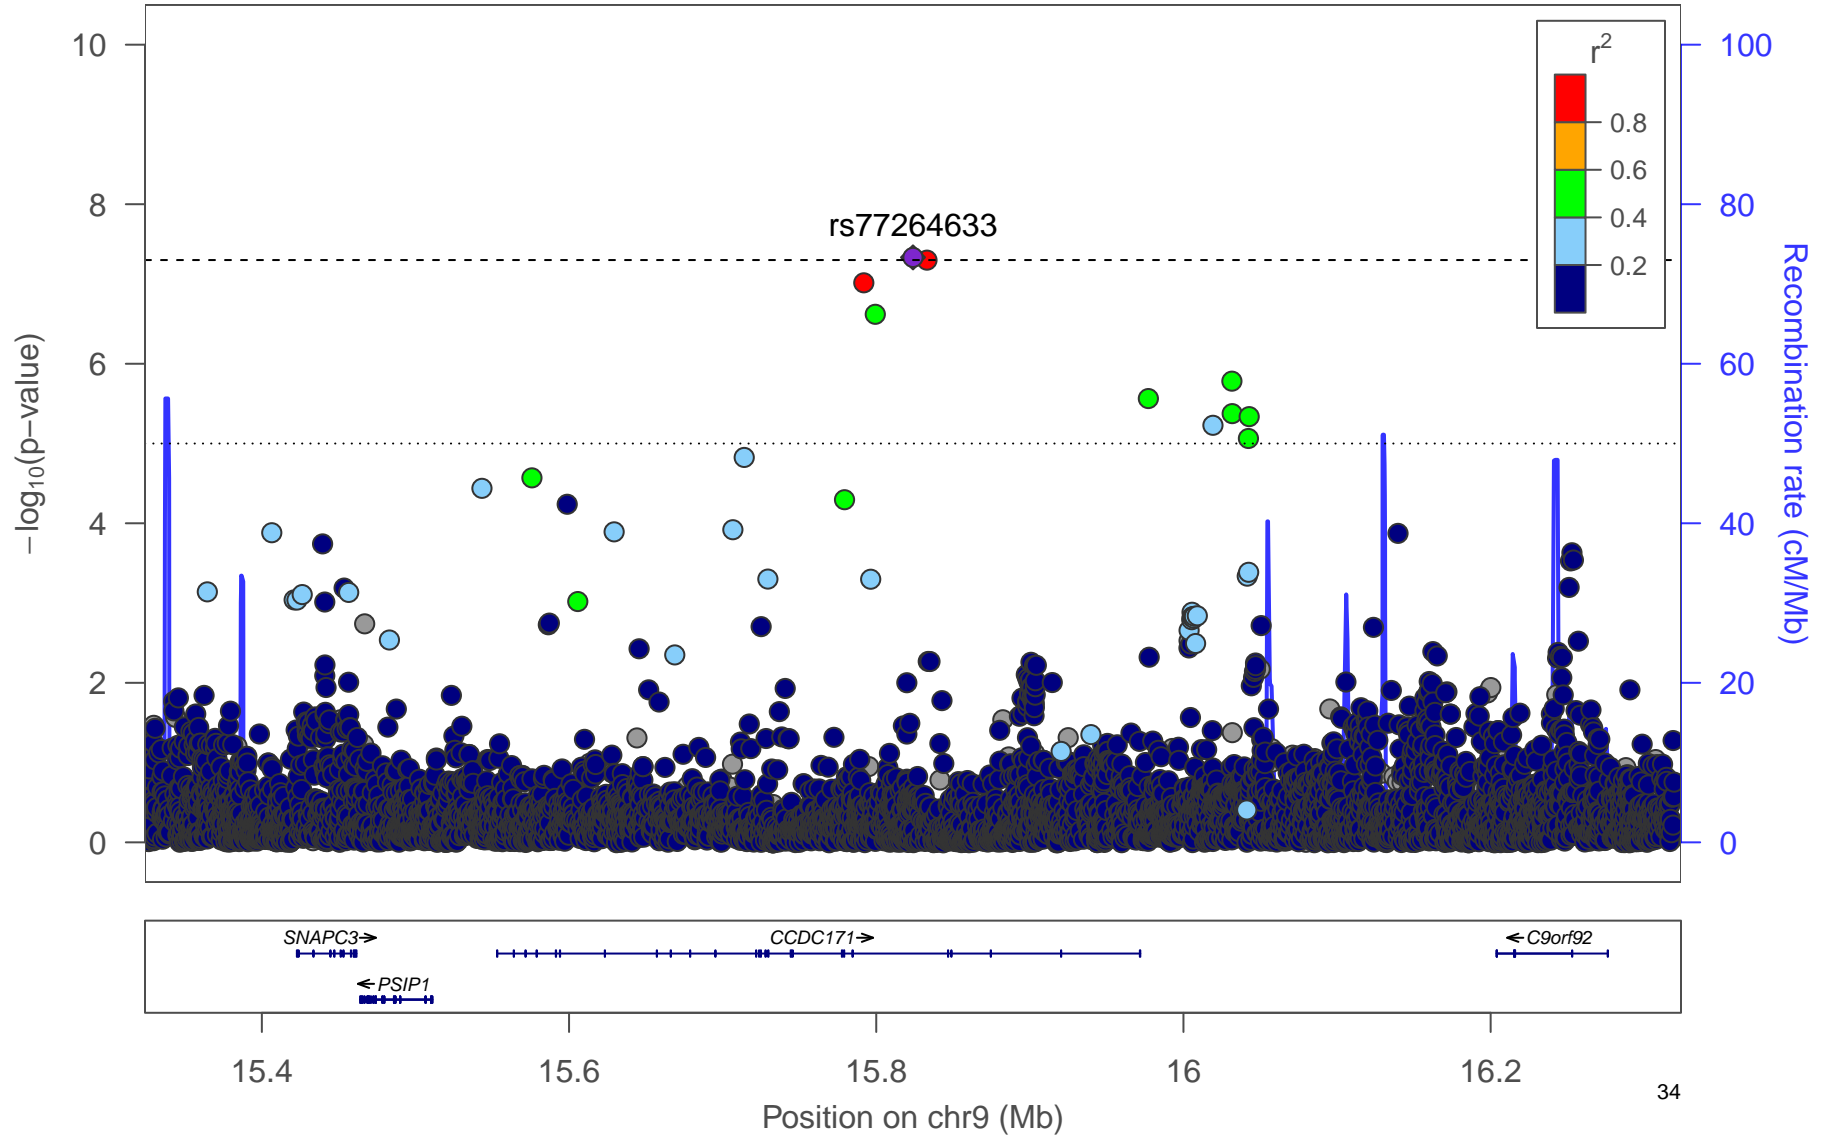



# h) WCadjBMI All

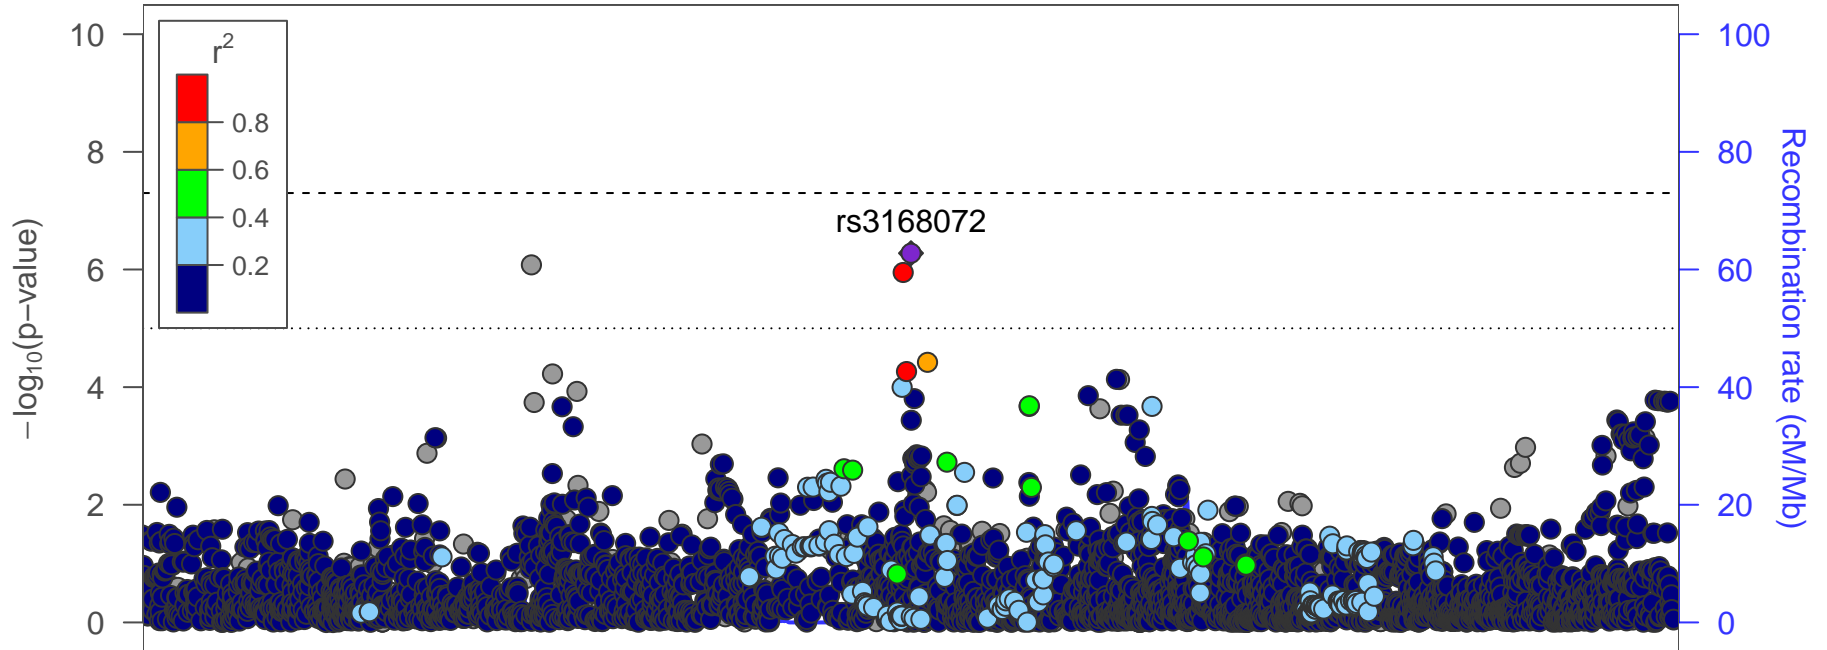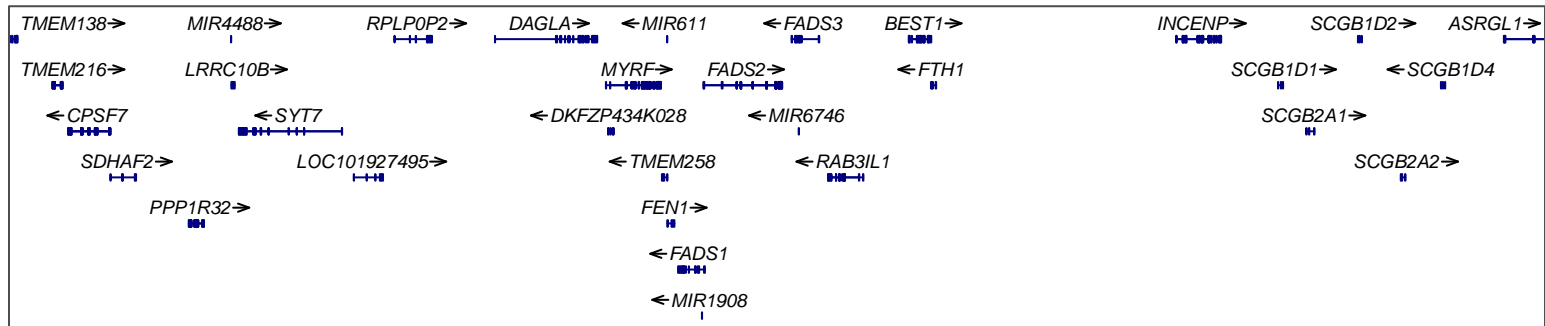

61.2

61.4

61.6

61.8

62

Position on chr11 (Mb)

# i) WCadjBMI All

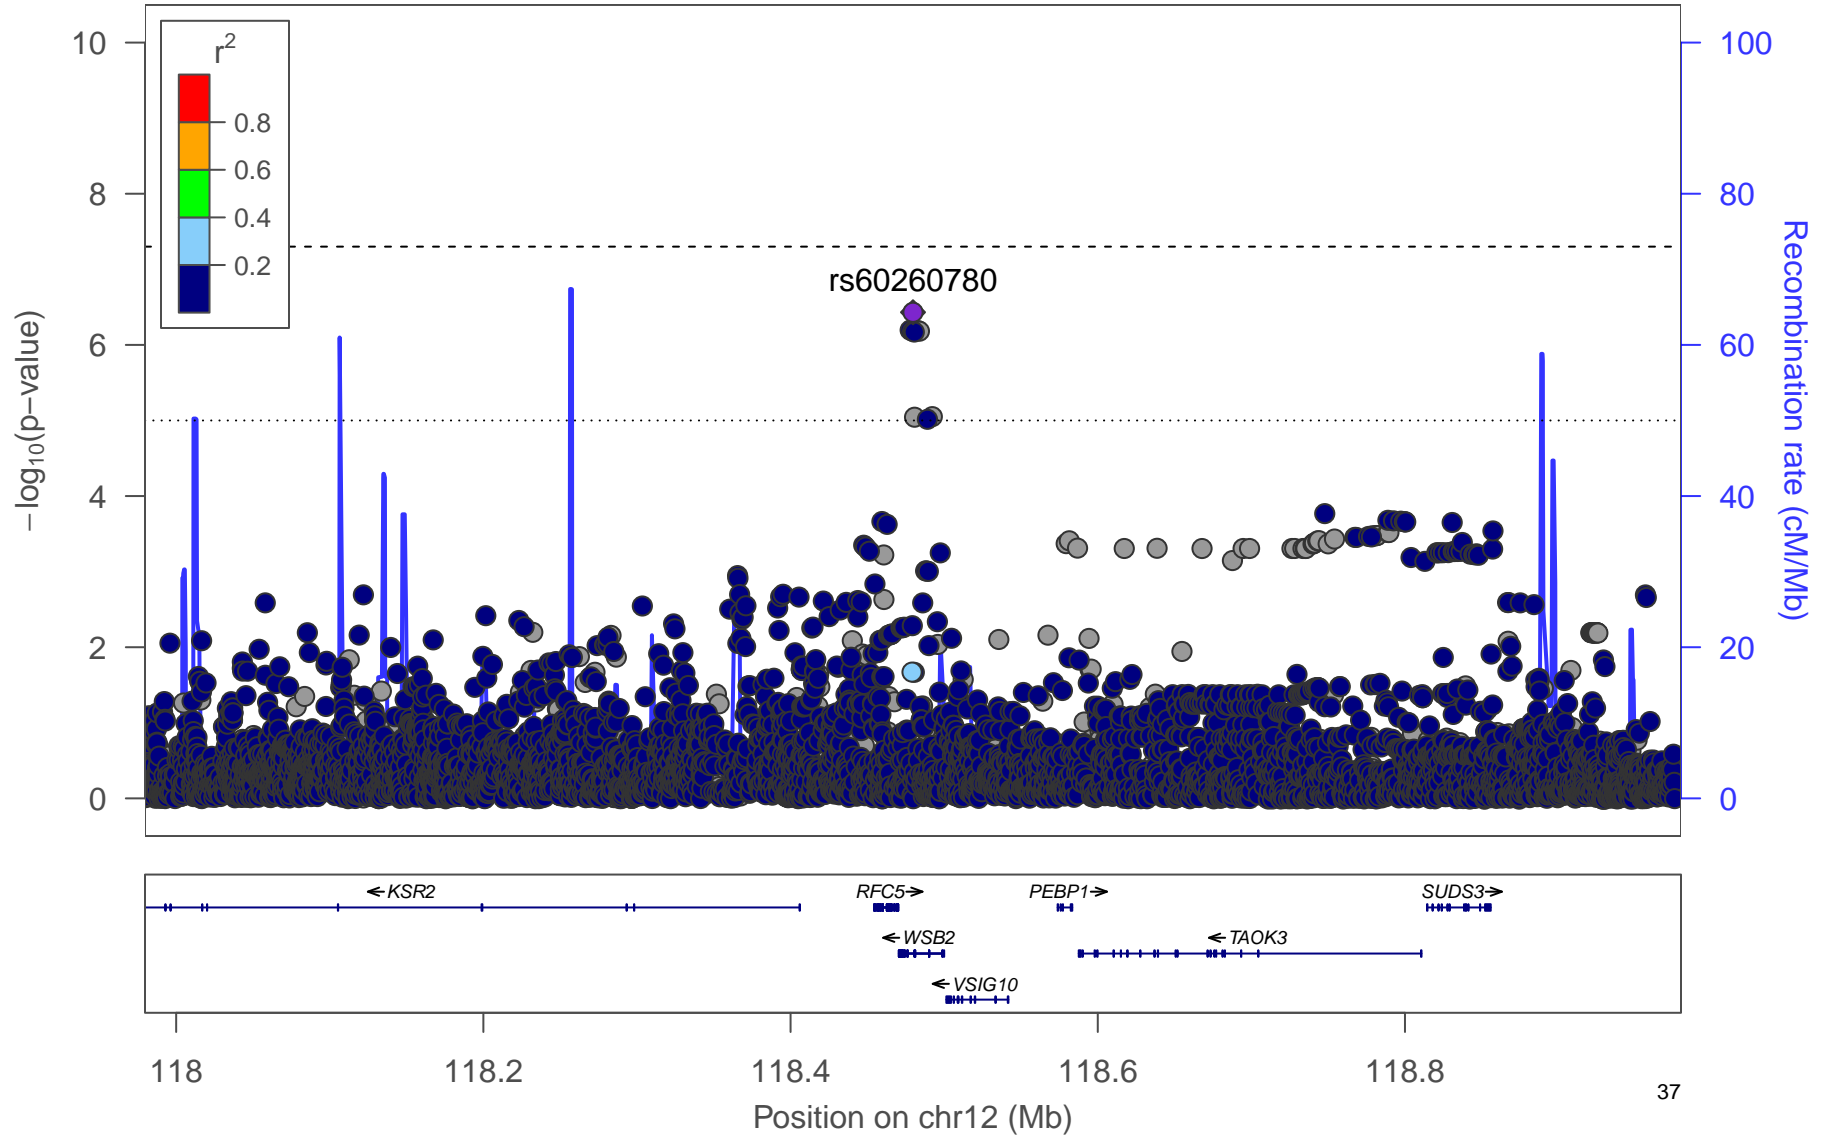

**Supplementary Figure 10. Manhattan plot.** Manhattan plot of the women-only analysis for WCadjBMI. All suggestively significant ( $P < 1 \times 10^{-6}$ ) variants are highlighted in orange if they are >500 Kb from any previously-reported WCadjBMI associated variants. Previously reported loci ( $\pm 500$  Kb) are highlighted in blue if any variant in the locus reached suggestive significance. All suggestively significant loci that meet our criteria for replication are annotated with the closest gene. † Replicated in African American meta-analysis. ‡ Replicated in Hispanic/Latino meta-analysis. ¥ Replicated in European American meta-analysis.

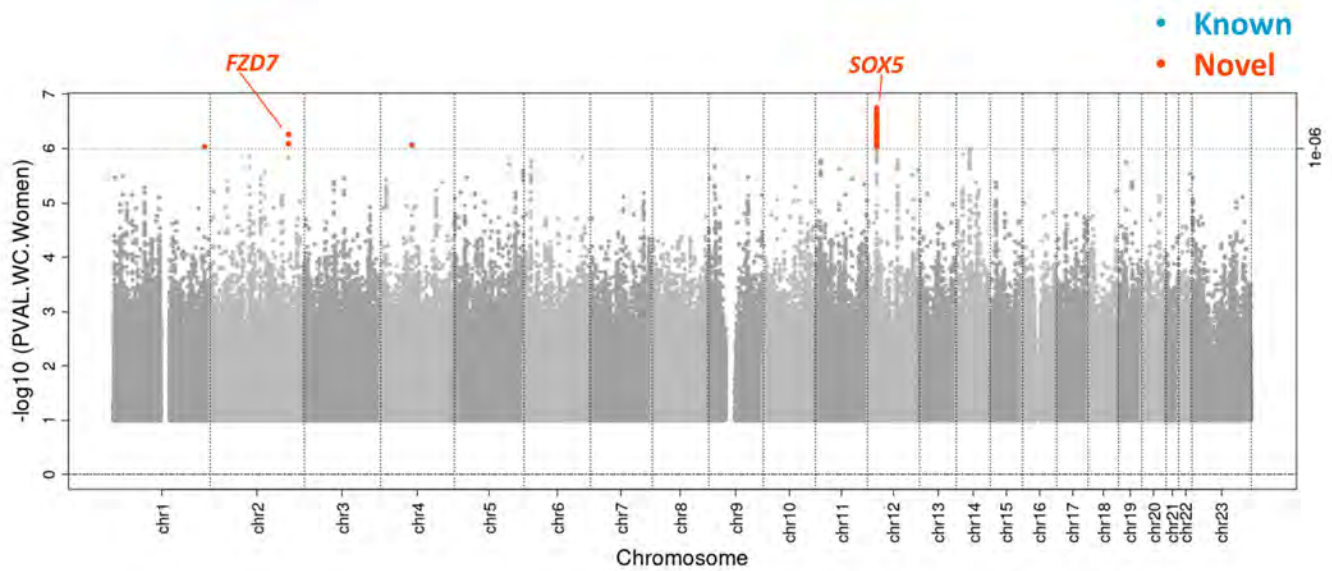

**Supplementary Figure 11. Locus Zoom Plots.** Regional association plots for suggestively significant loci in the HCHS/SOL WCadjBMI women-only analysis. The plots appear in chromosome:position order. Dot color reflects  $R^2$  calculated from the 1000 Genomes AMR reference dataset. Point symbols represent variant functional classifications: a) rs112469617, *FZD7*; b) rs17385466, *SOX5*.

# a) WCadjBMI Women

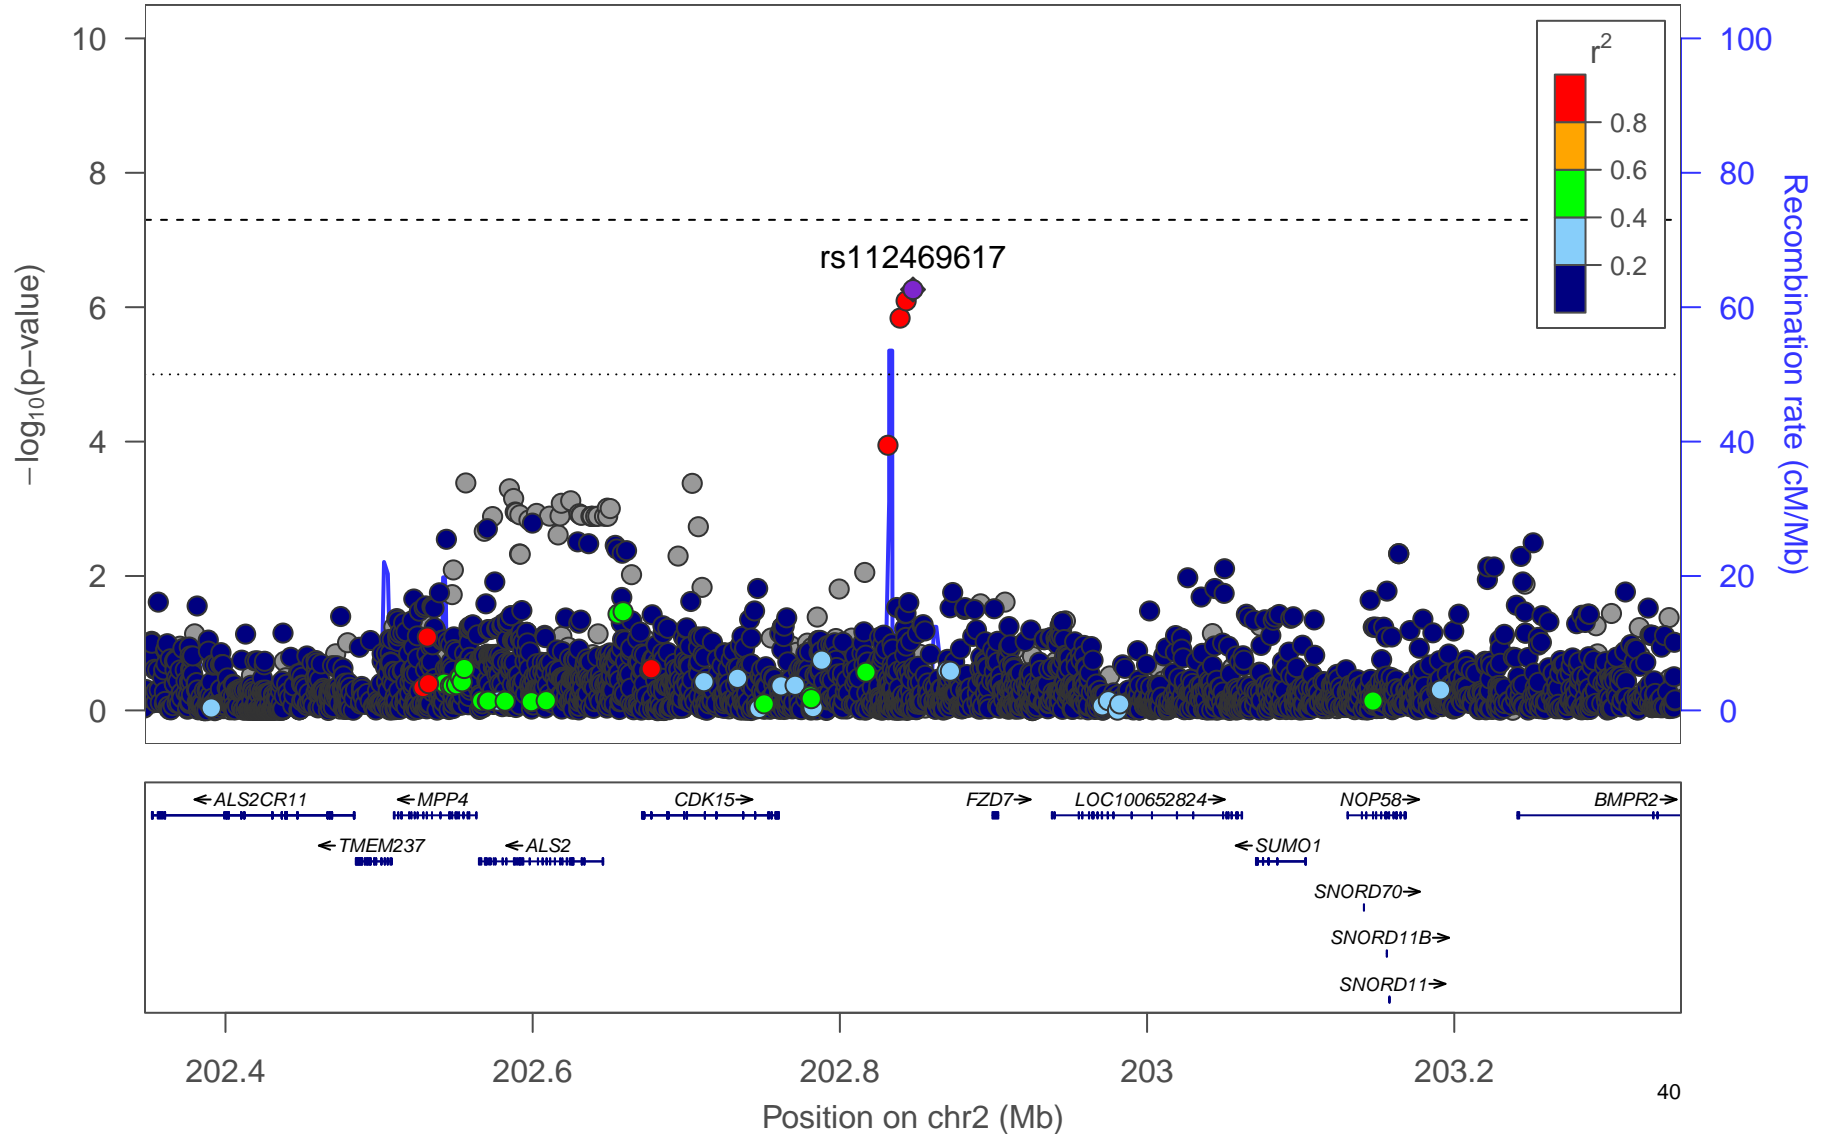



## b) WCadjBMI Women

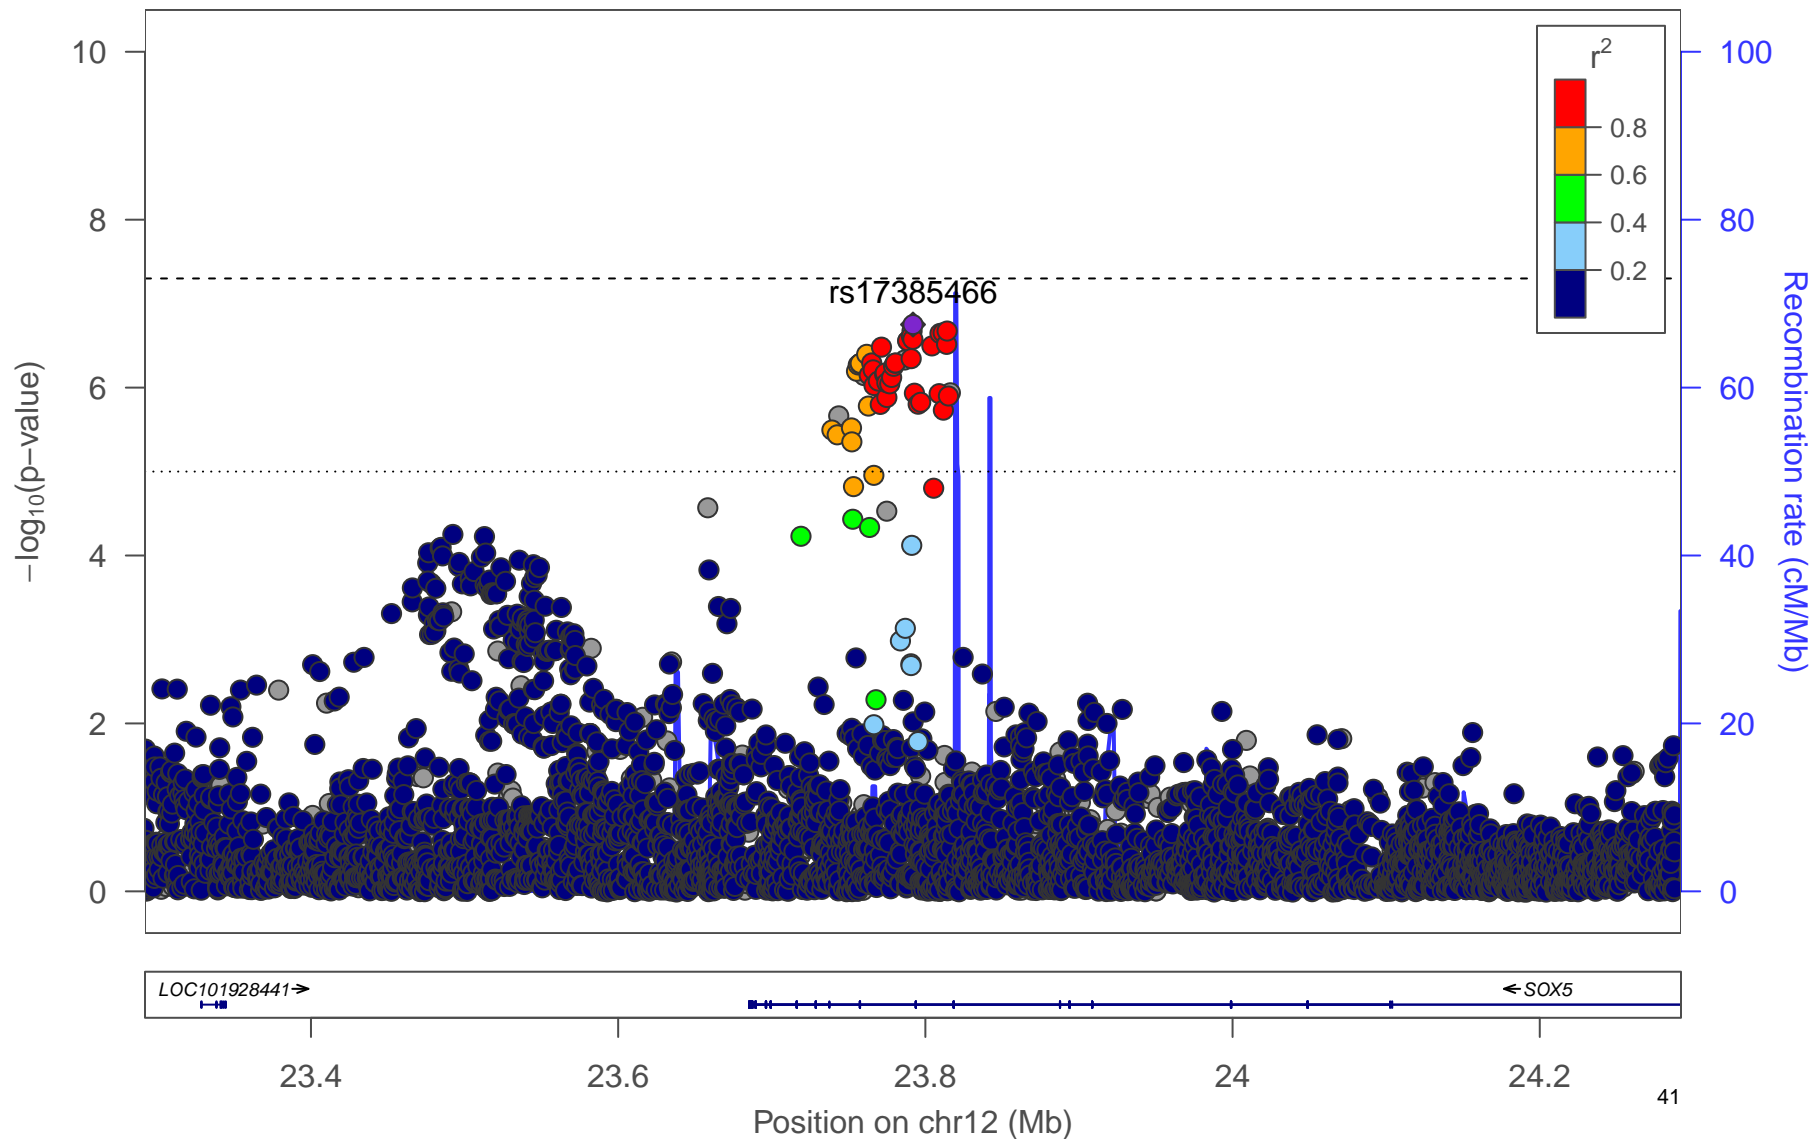

**Supplementary Figure 12. Manhattan plot.** Manhattan plot of the men-only analysis for WCadjBMI. All suggestively significant ( $P < 1 \times 10^{-6}$ ) variants are highlighted in orange if they are >500 Kb from any previously-reported WCadjBMI associated variants. Previously reported loci (+/- 500 Kb) are highlighted in blue if any variant in the locus reached suggestive significance. All suggestively significant loci that meet our criteria for replication are annotated with the closest gene. † Replicated in African American meta-analysis. ‡ Replicated in Hispanic/Latino meta-analysis. ¥ Replicated in European American meta-analysis.

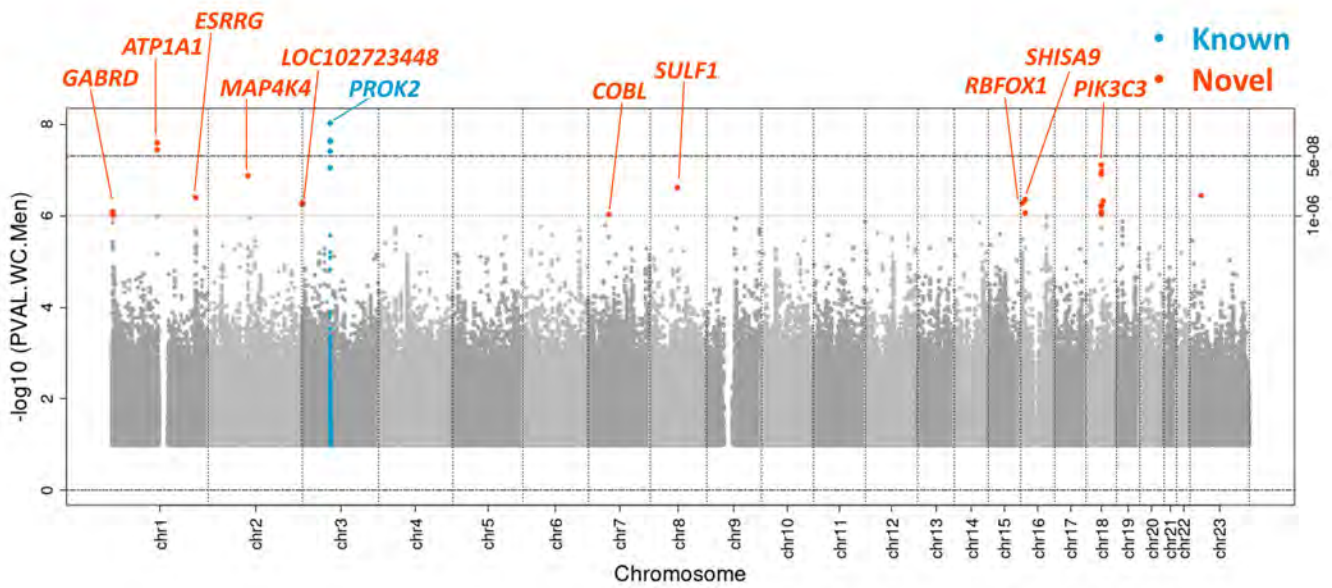

**Supplementary Figure 13. Locus Zoom Plots.** Regional association plots for suggestively significant loci in the HCHS/SOL WCadjBMI men-only analysis. The plots appear in chromosome:position order. Dot color reflects  $R^2$  calculated from the 1000 Genomes AMR reference dataset. Point symbols represent variant functional classifications: a) rs74346221, *GABRD*; b) rs72693785, *ATP1A1*; c) rs11583298, *ESRRG*; d) rs76842062, *MAP4K4*; e) rs141365360, *LOC102723448*; f) rs6809759, *PROK2*; g) rs76941364, *COBL*; h) rs139139519, *SULF1*; i) rs35569658, *RBFOX1*; j) rs148280037, *SHISA9*; k) rs143565319, *PIK3C3*.

# a) WCadjBMI Men

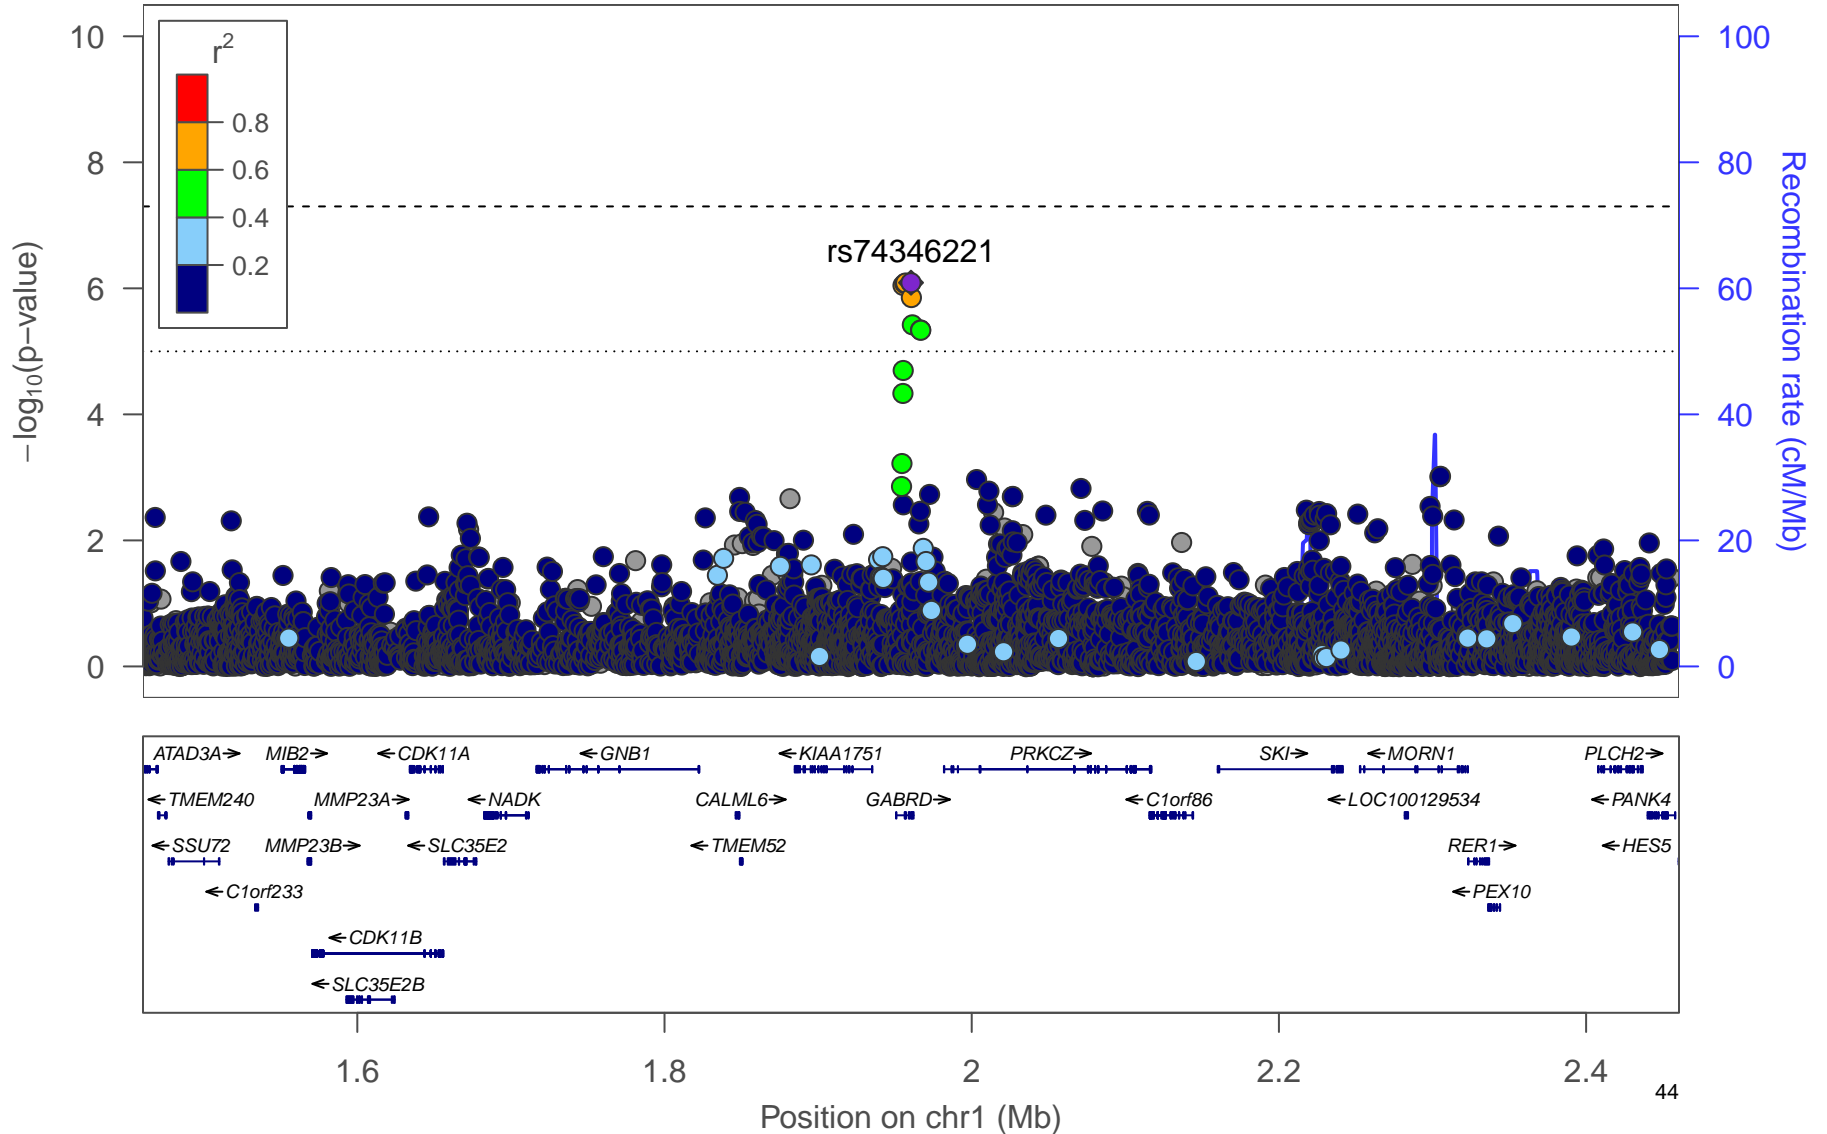

## b) WCadjBMI Men

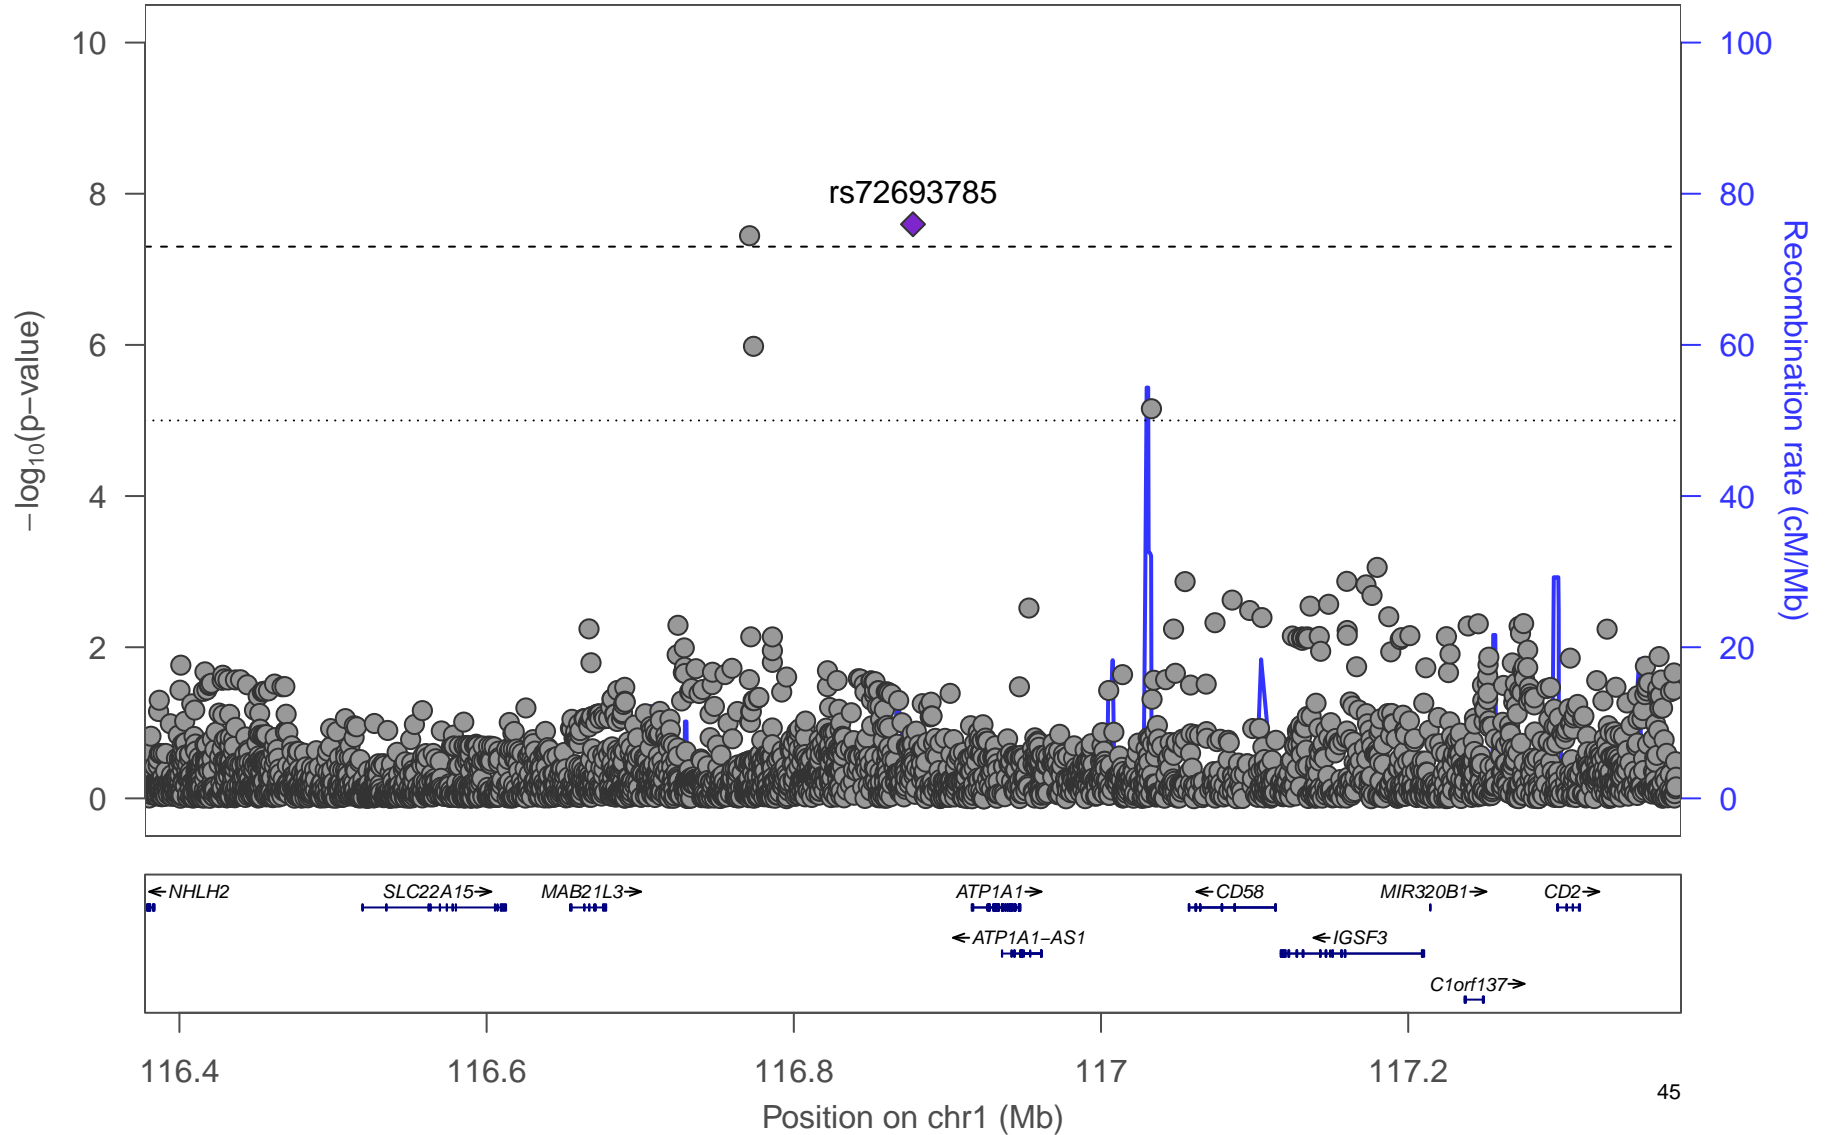

# c) WCadjBMI Men

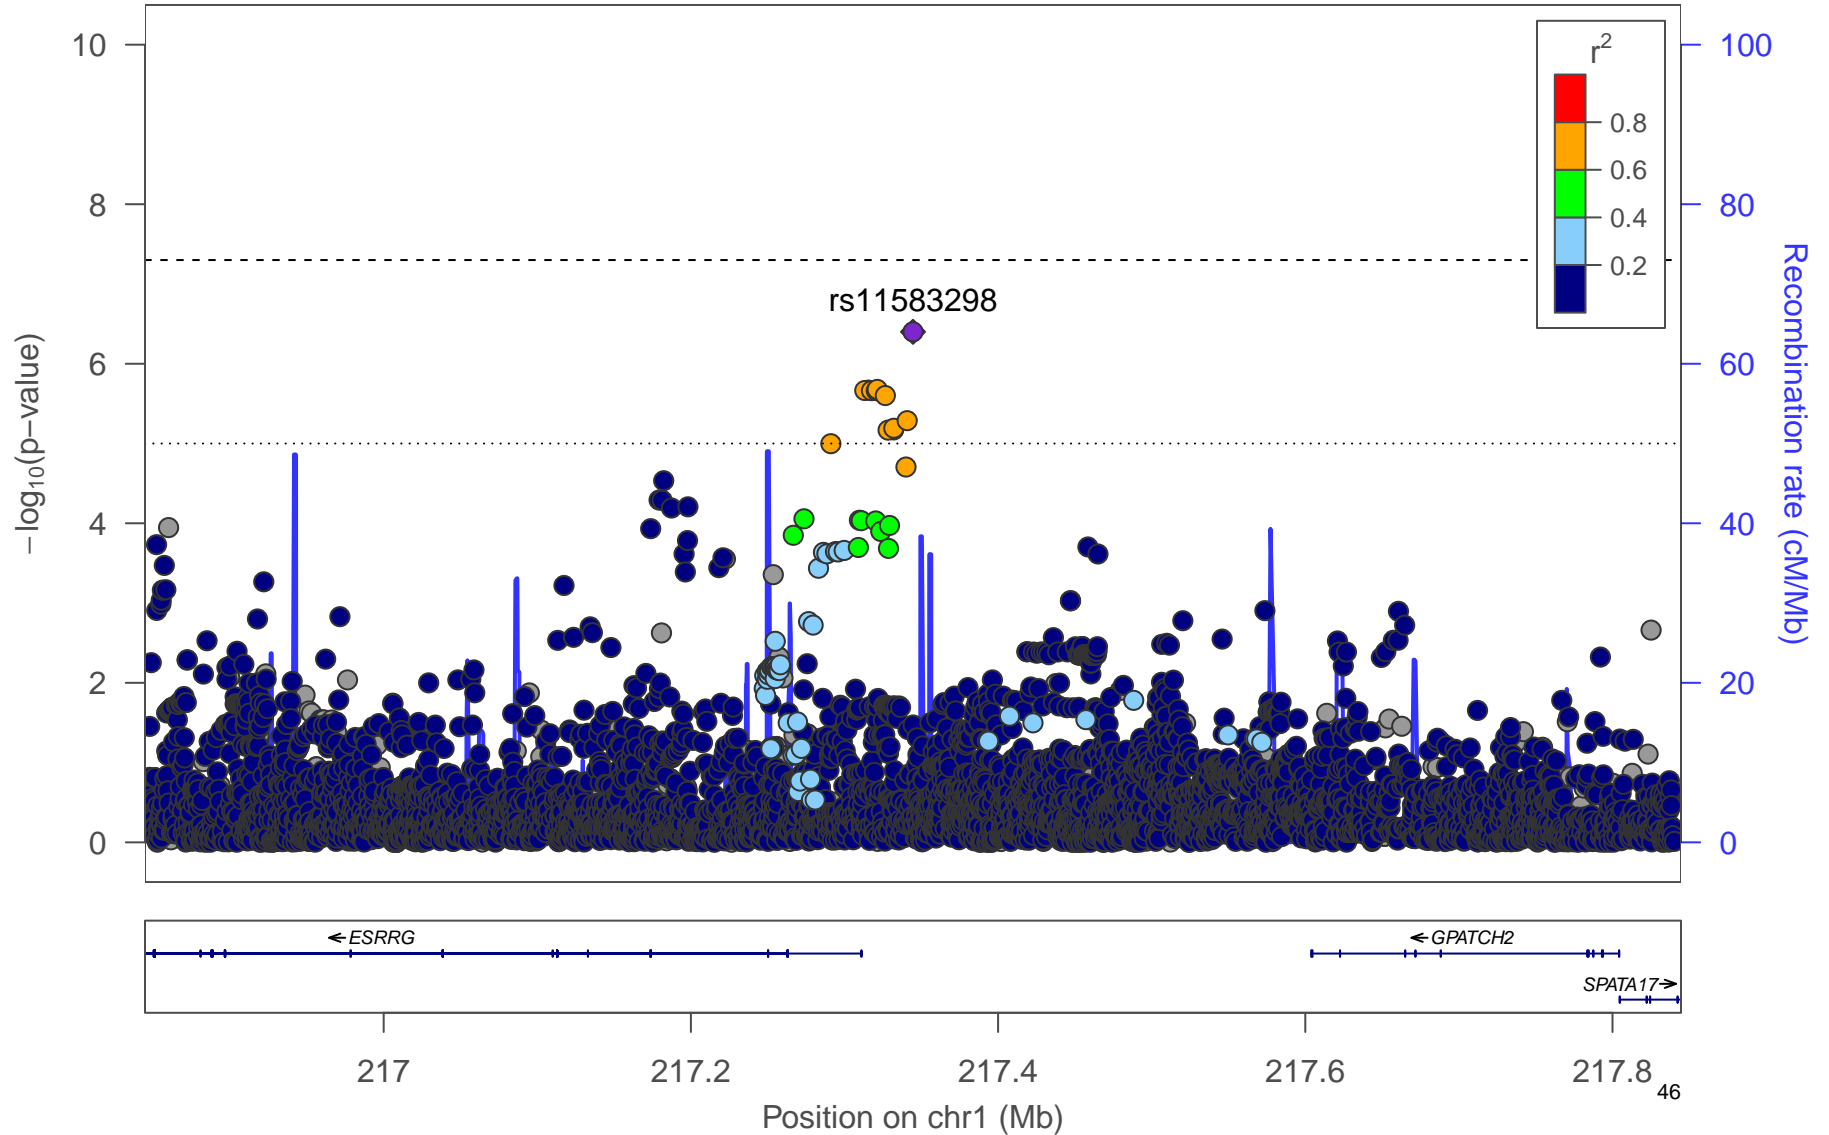

# d) WCadjBMI Men

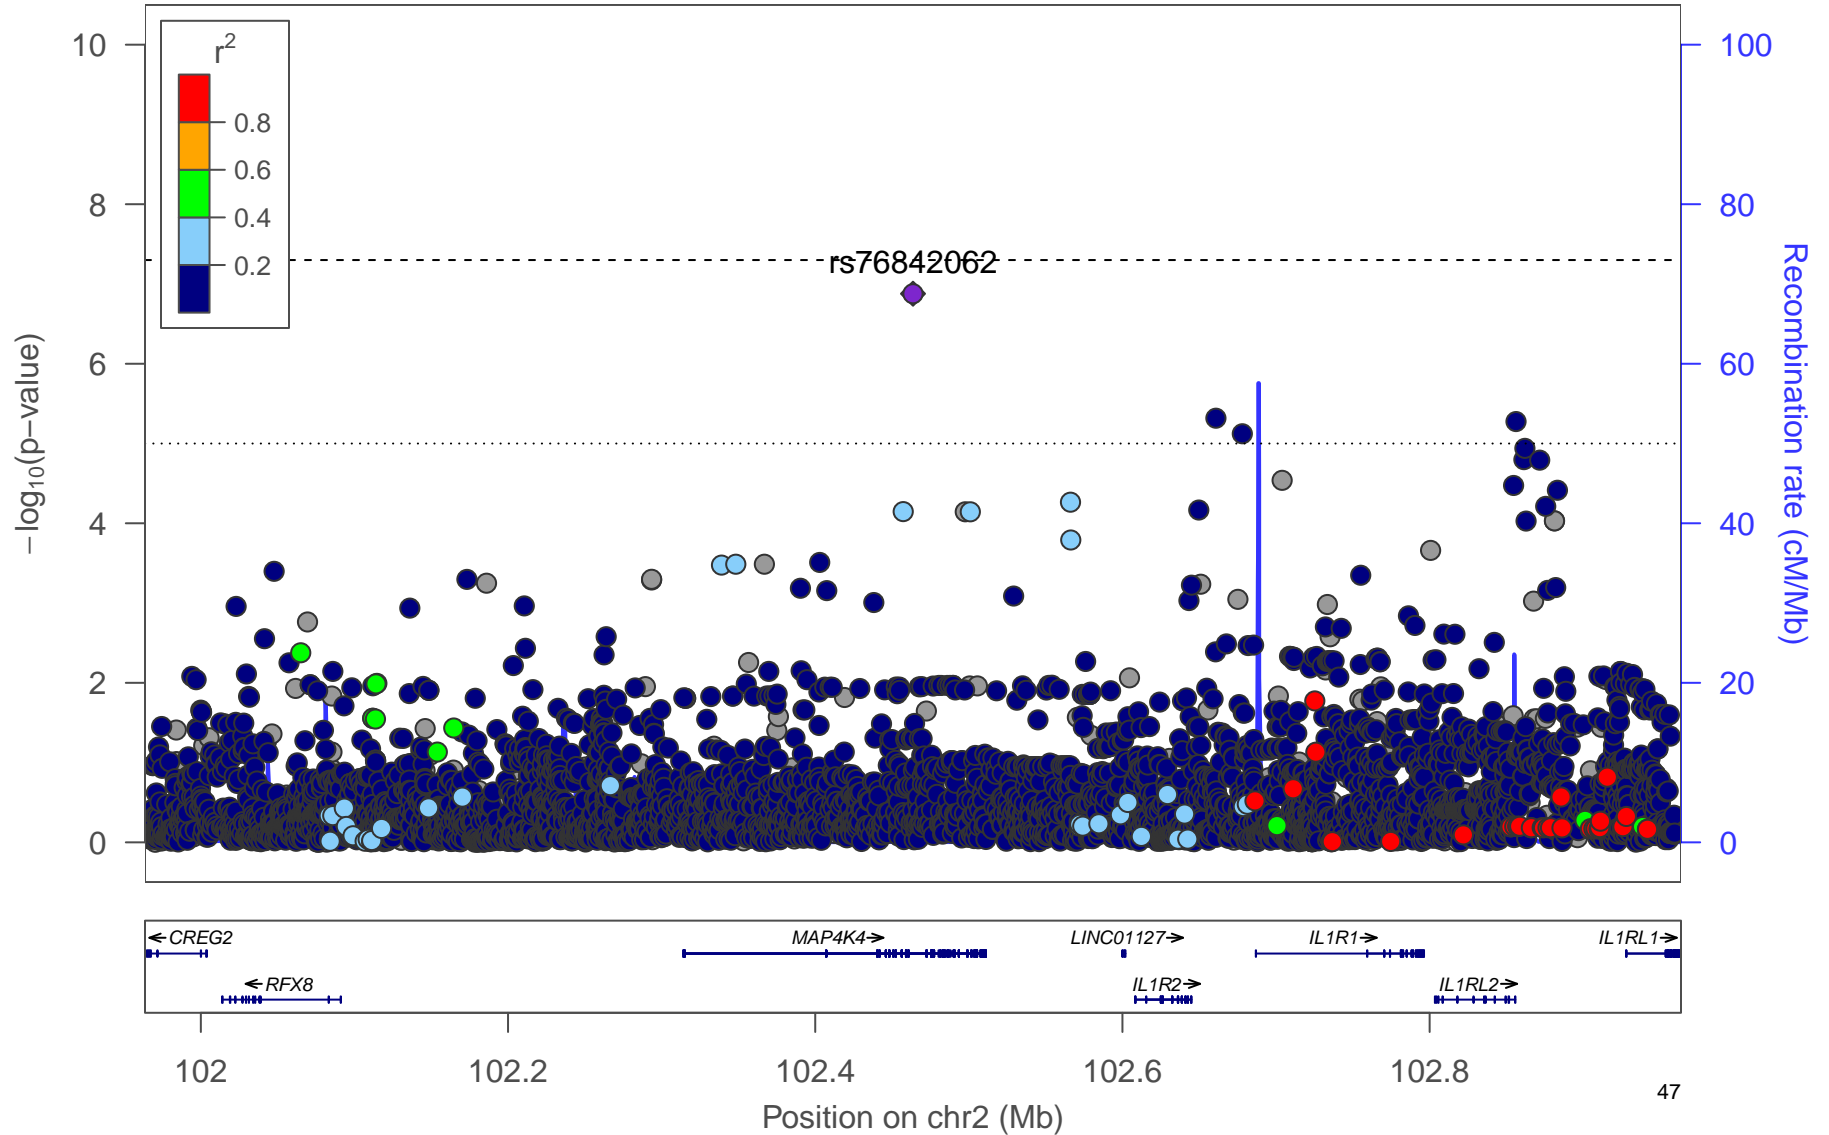

# e) WCadjBMI Men

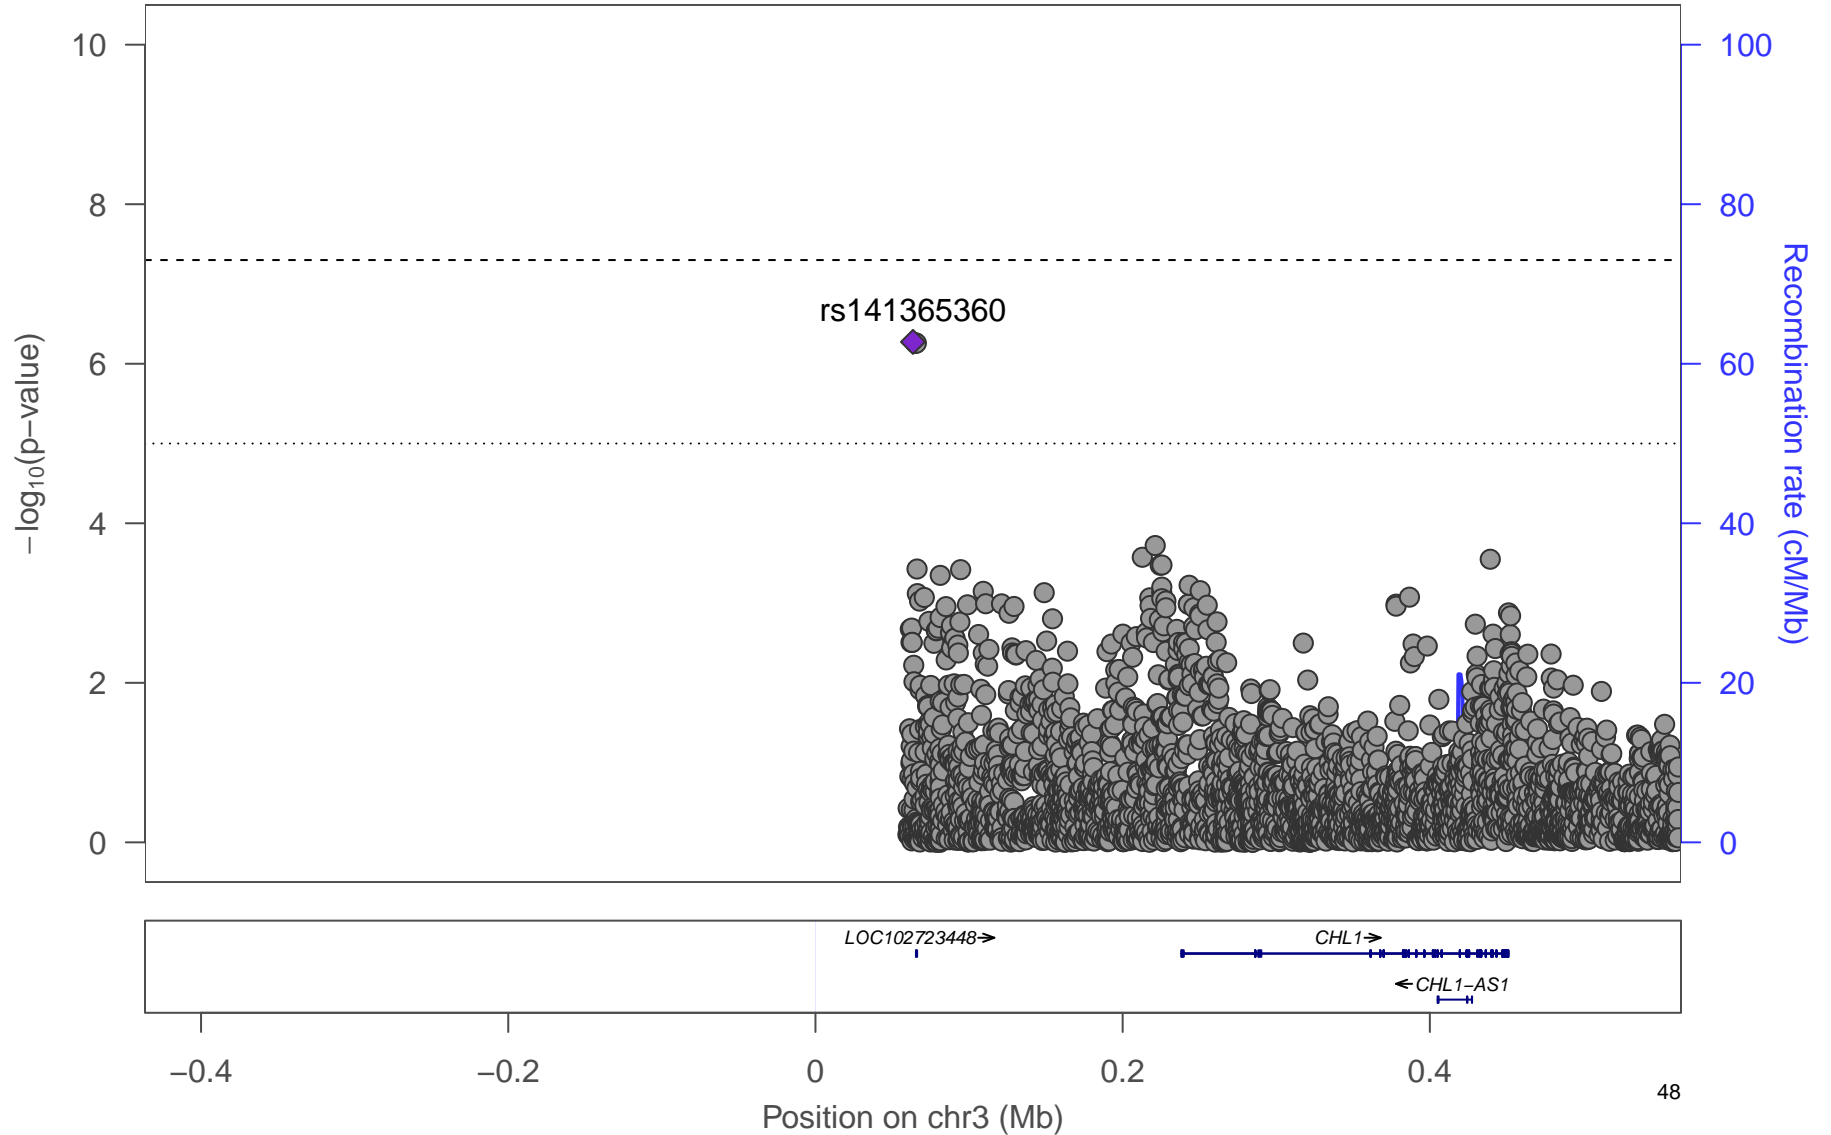



# f) WCadjBMI Men

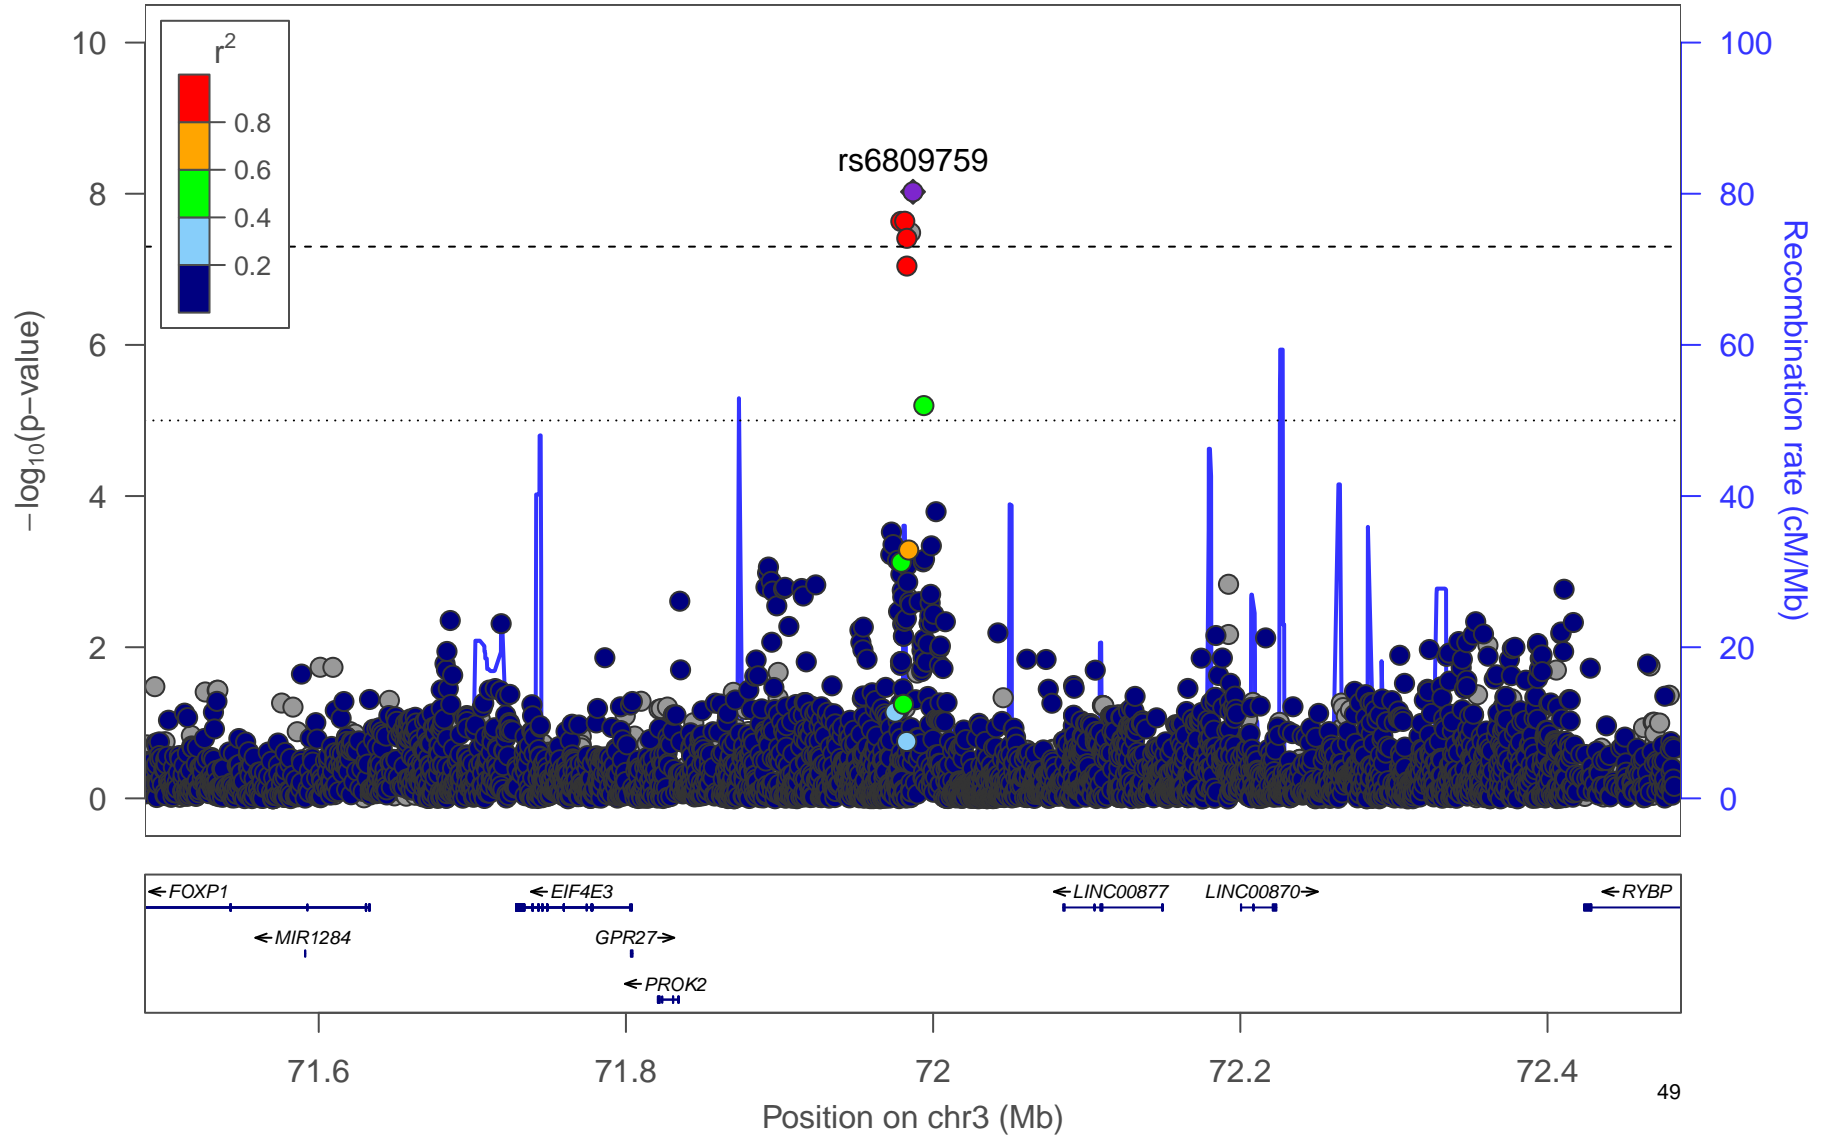

# g) WCadjBMI Men

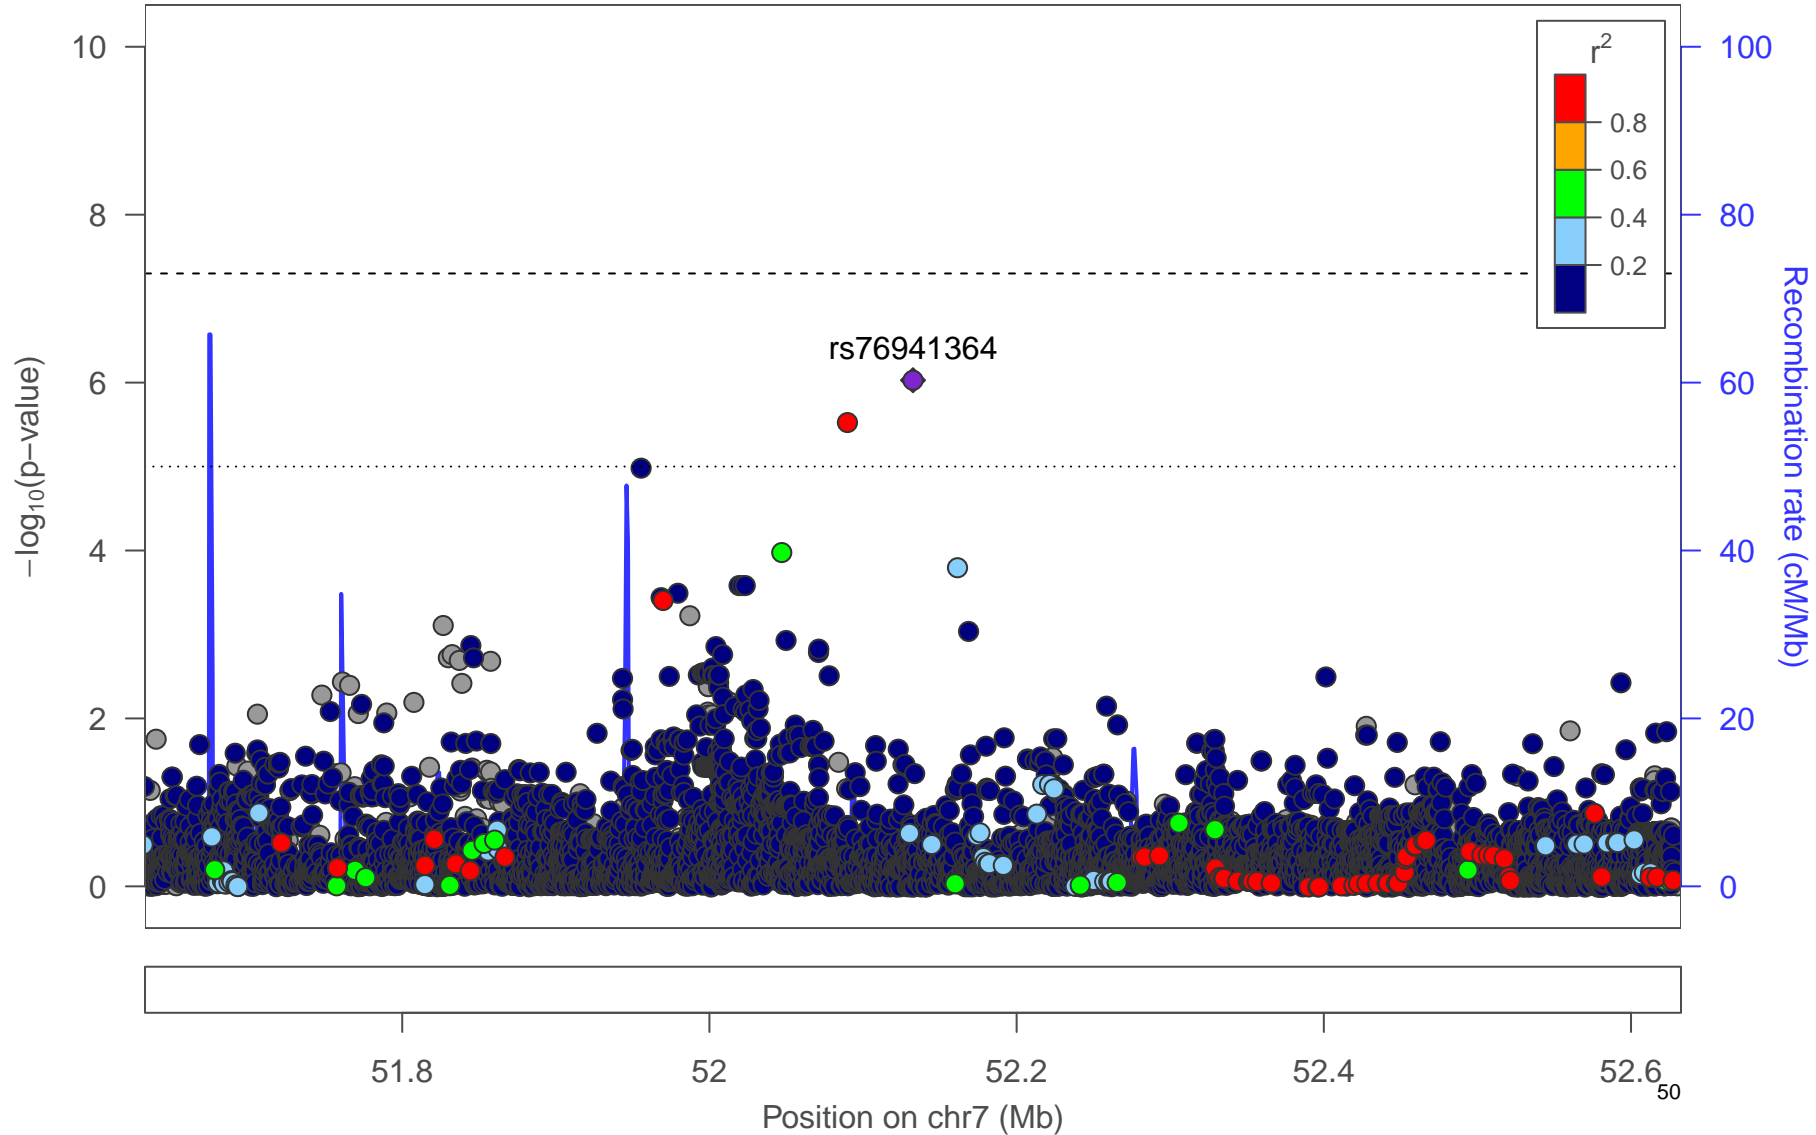

# h) WCadjBMI Men

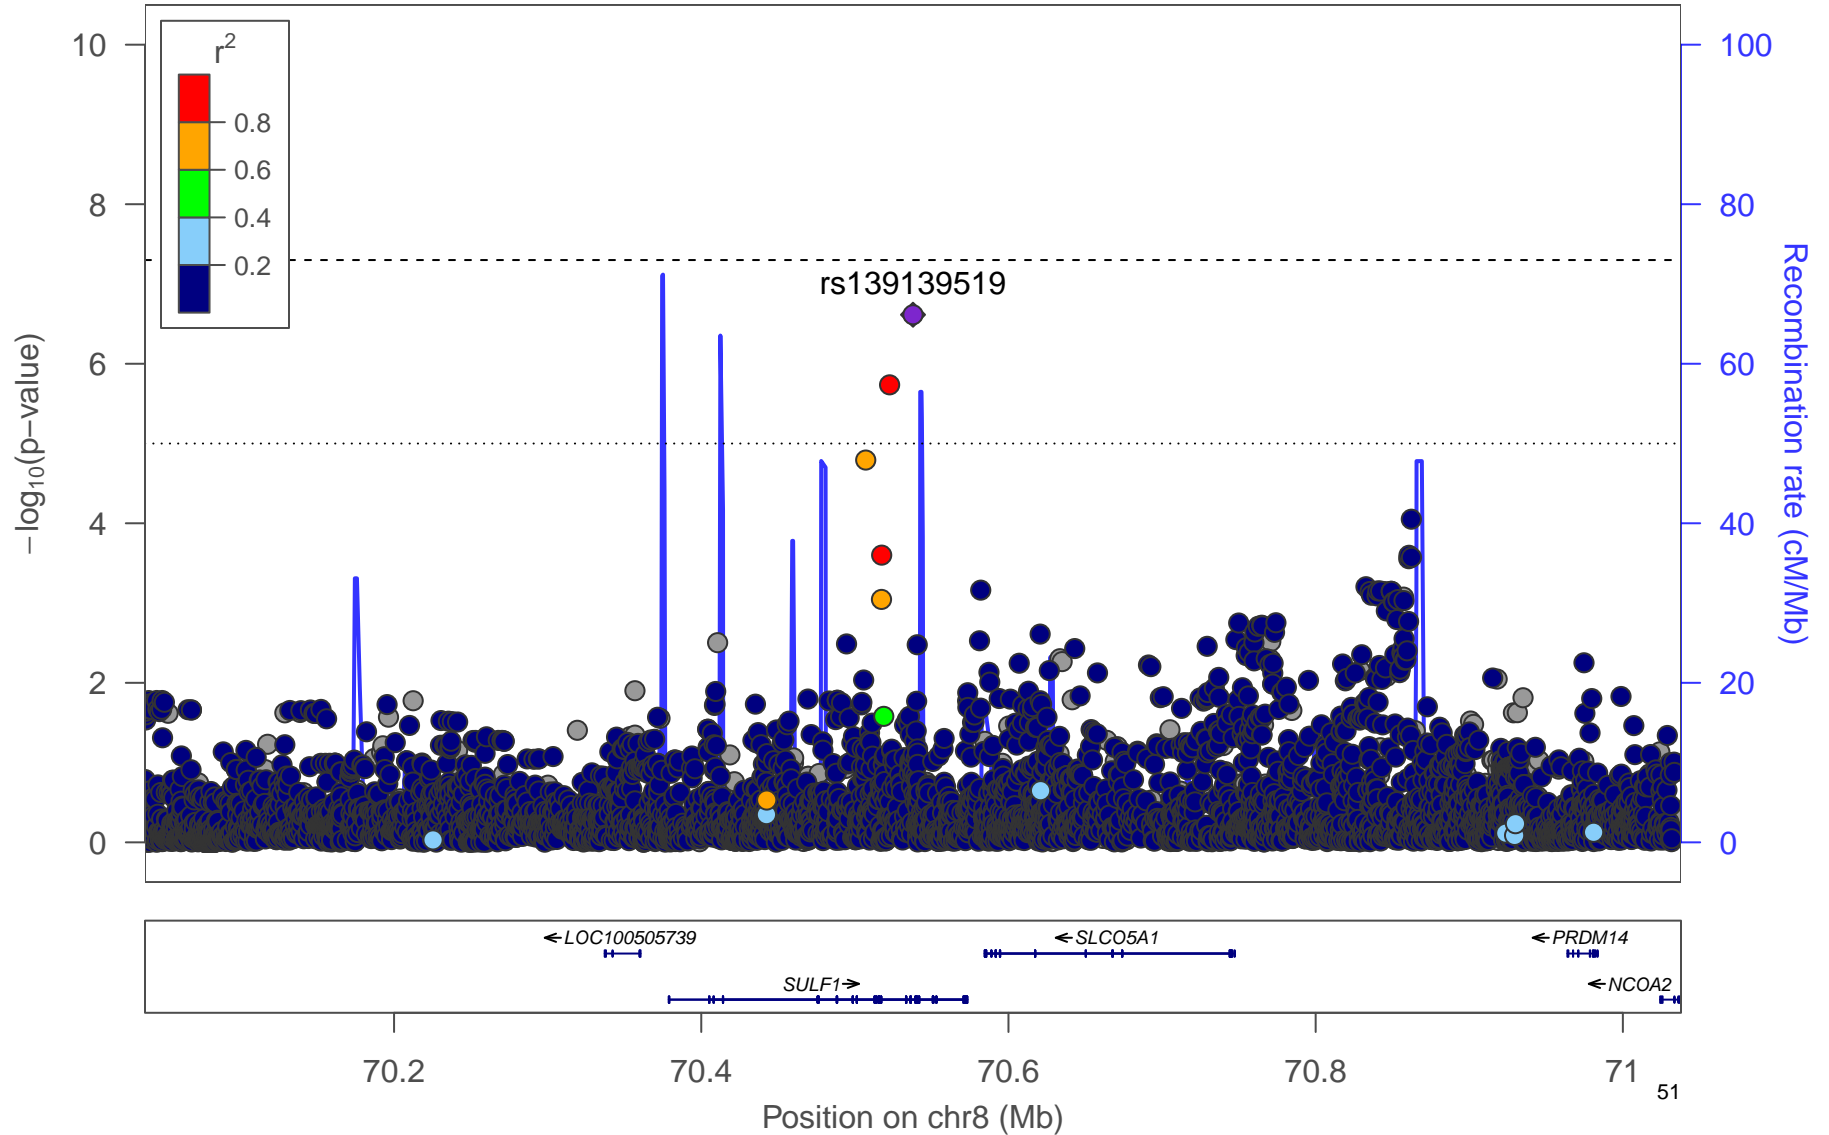

# i) WCadjBMI Men

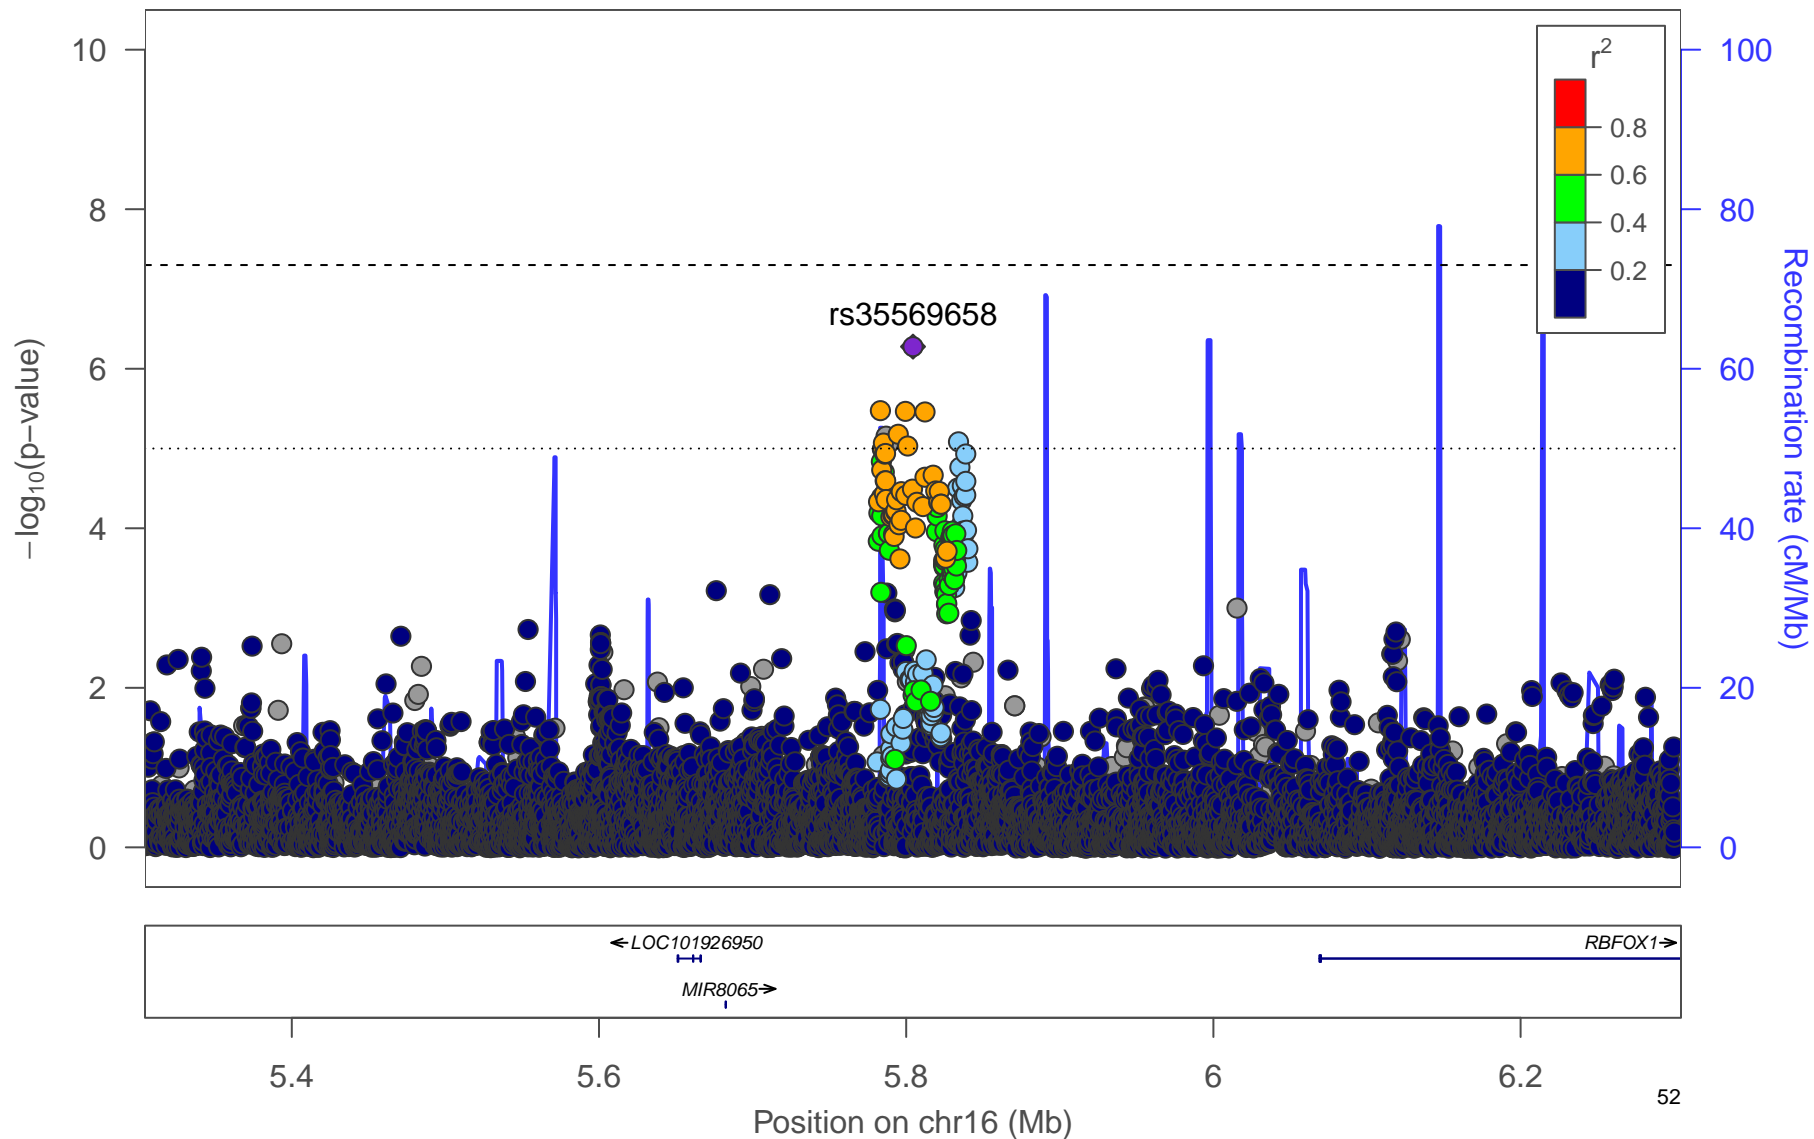

# j) WCadjBMI Men

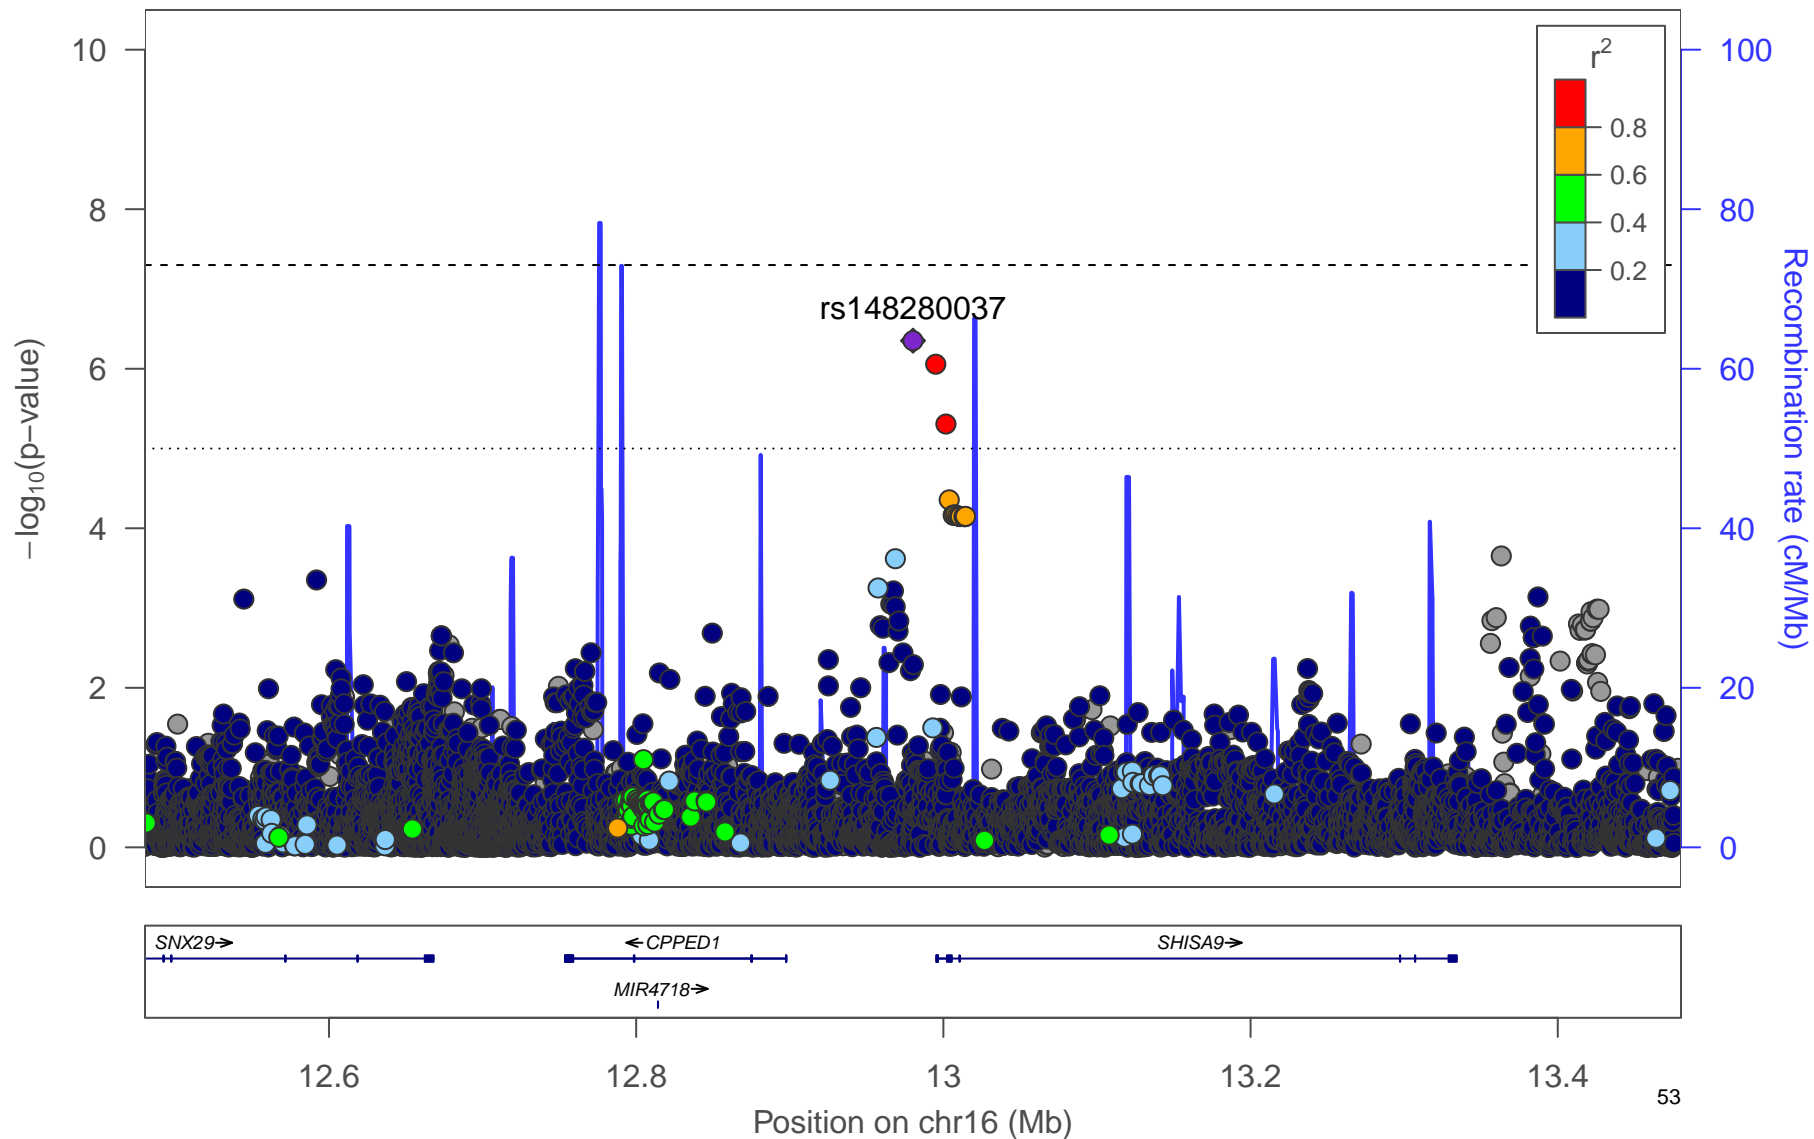

# k) WCadjBMI Men

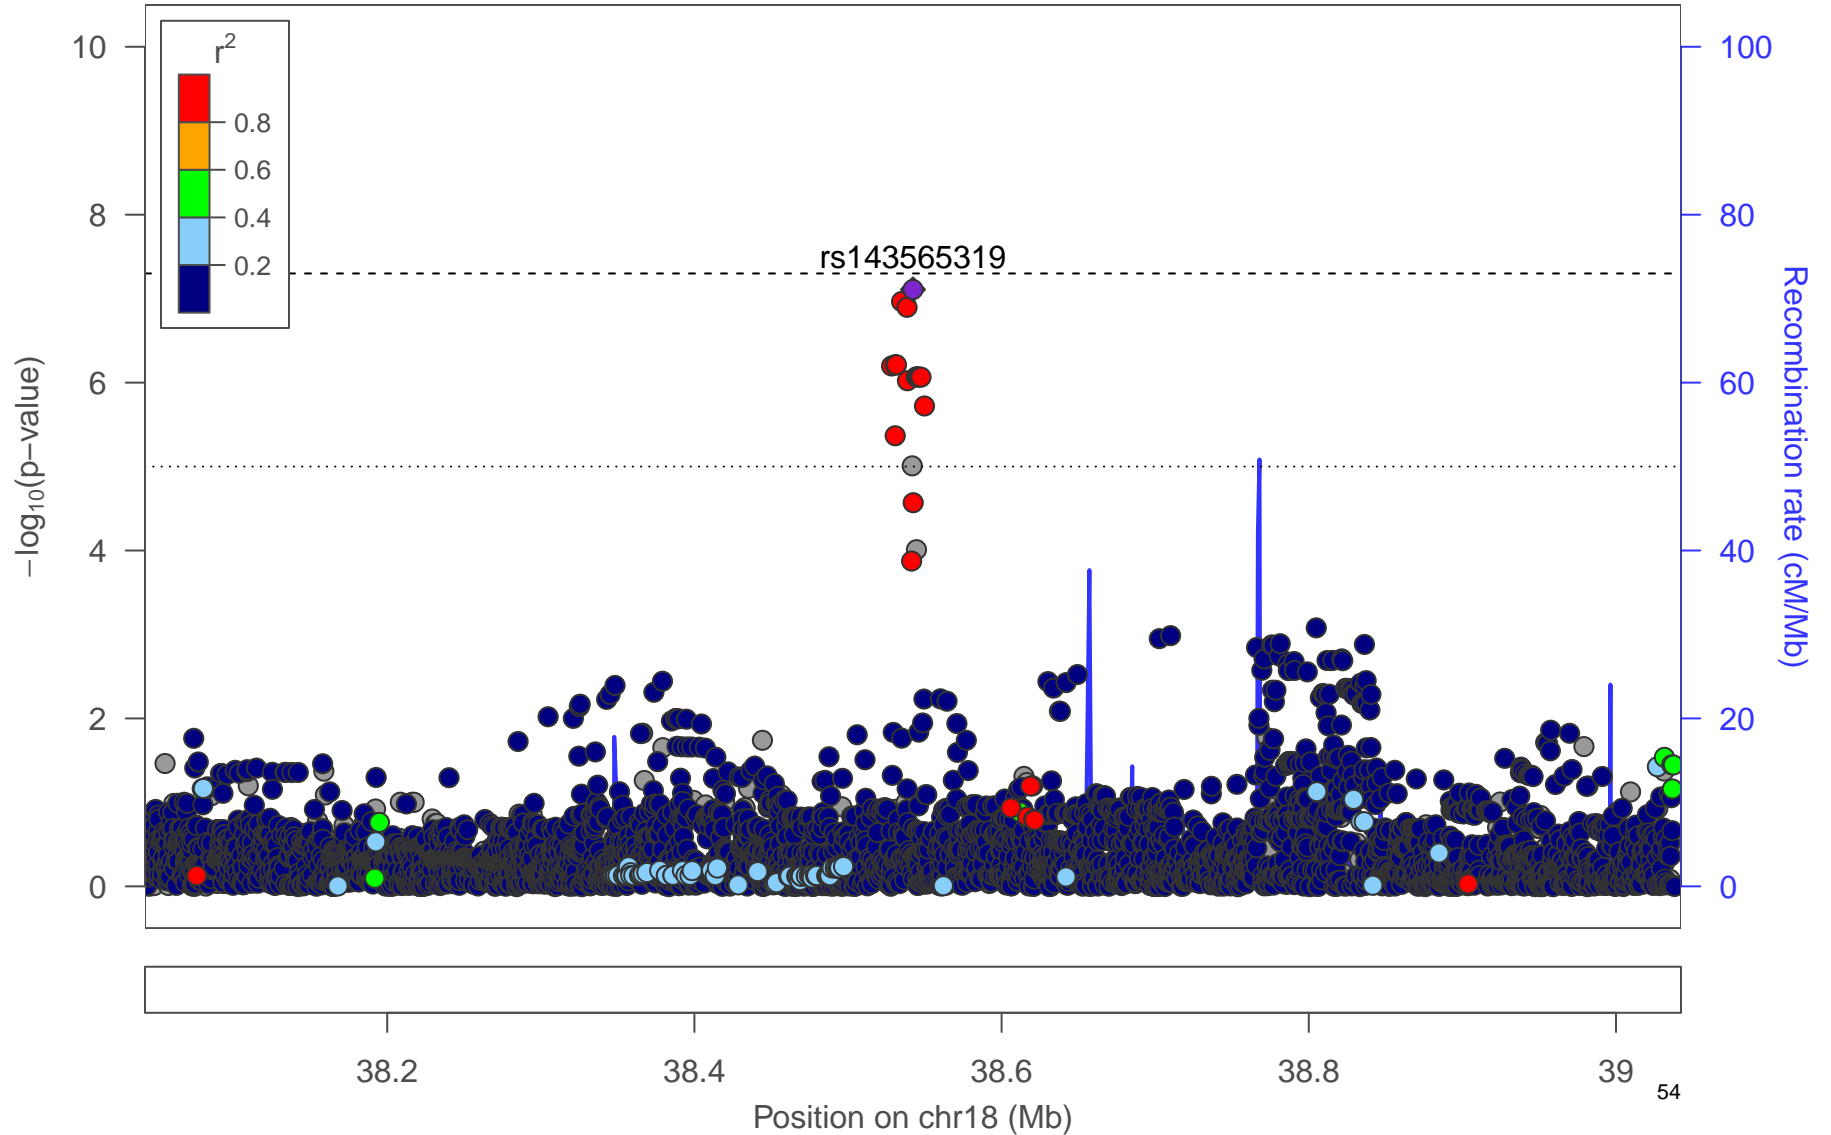

**Supplementary Figure 14. QQ Plots.** QQ Plots for WCadjBMI, including sexes-combined (black), women-only (orange), men-only (blue).

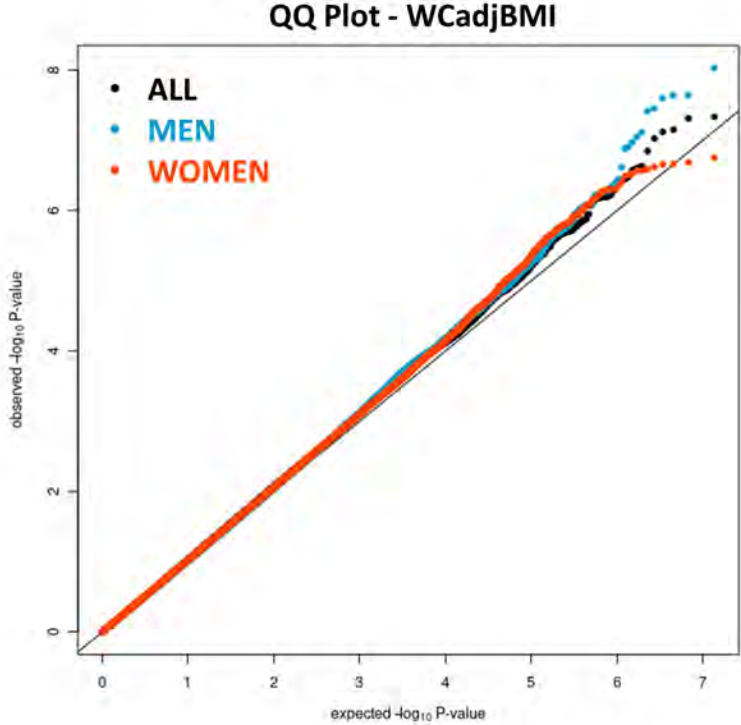

**Supplementary Figure 15. Manhattan plot.** Manhattan plot of the sexes-combined analysis for HIPadjBMI. All suggestively significant ( $P < 1 \times 10^{-6}$ ) variants are highlighted in orange if they are >500 Kb from any previously-reported HIPadjBMI associated variants. Previously reported loci ( $\pm 500$  Kb) are highlighted in blue if any variant in the locus reached suggestive significance. All suggestively significant loci that meet our criteria for replication are annotated with the closest gene. † Replicated in African American meta-analysis. ‡ Replicated in Hispanic/Latino meta-analysis. ¥ Replicated in European American meta-analysis.

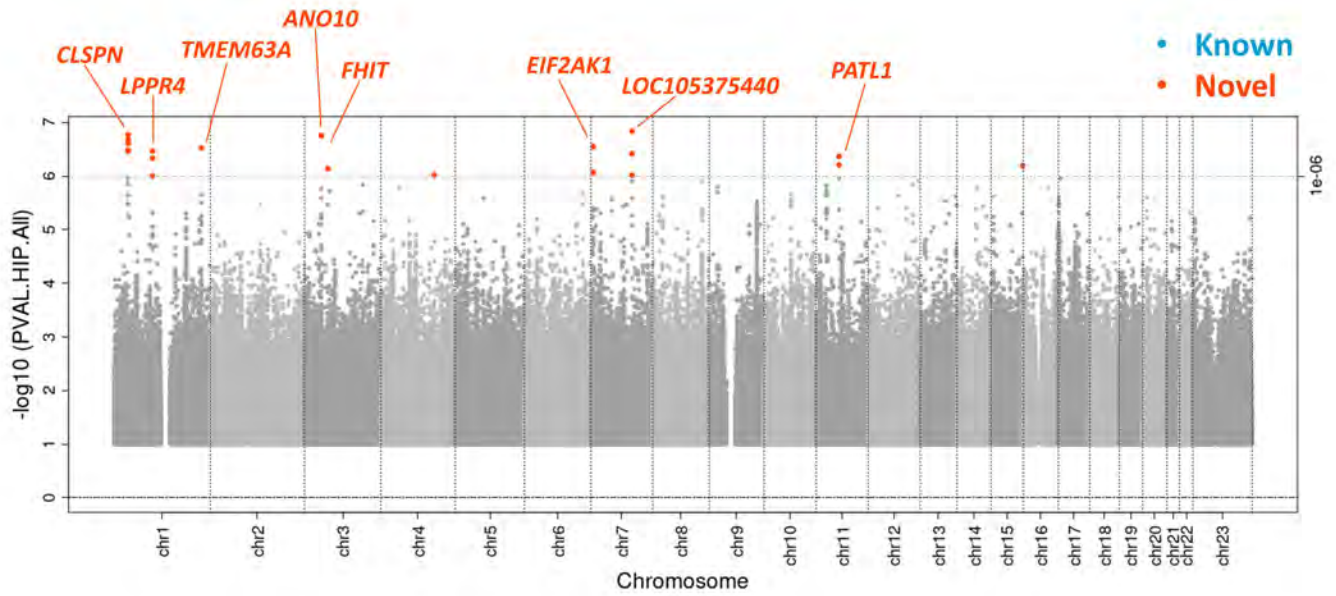



**Supplementary Figure 16. Locus Zoom Plots: HIPadjBMI.** Regional association plots for suggestively significant loci in the HCHS/SOL HIPadjBMI sexes-combined analysis. The plots appear in chromosome:position order. Dot color reflects  $R^2$  calculated from the 1000 Genomes AMR reference dataset. Point symbols represent variant functional classifications: a) rs144655586, *CLSPN*; b) rs712900, *LPPR4*; c) rs115546449, *TMEM63A*; d) rs145815581, *ANO10*; e) rs72886347, *FHIT*; f) rs17136358, *EIF2AK1*; g) rs117683919, *LOC105375440*; h) rs143542634, *PATL1*.

# a) HIPadjBMI All

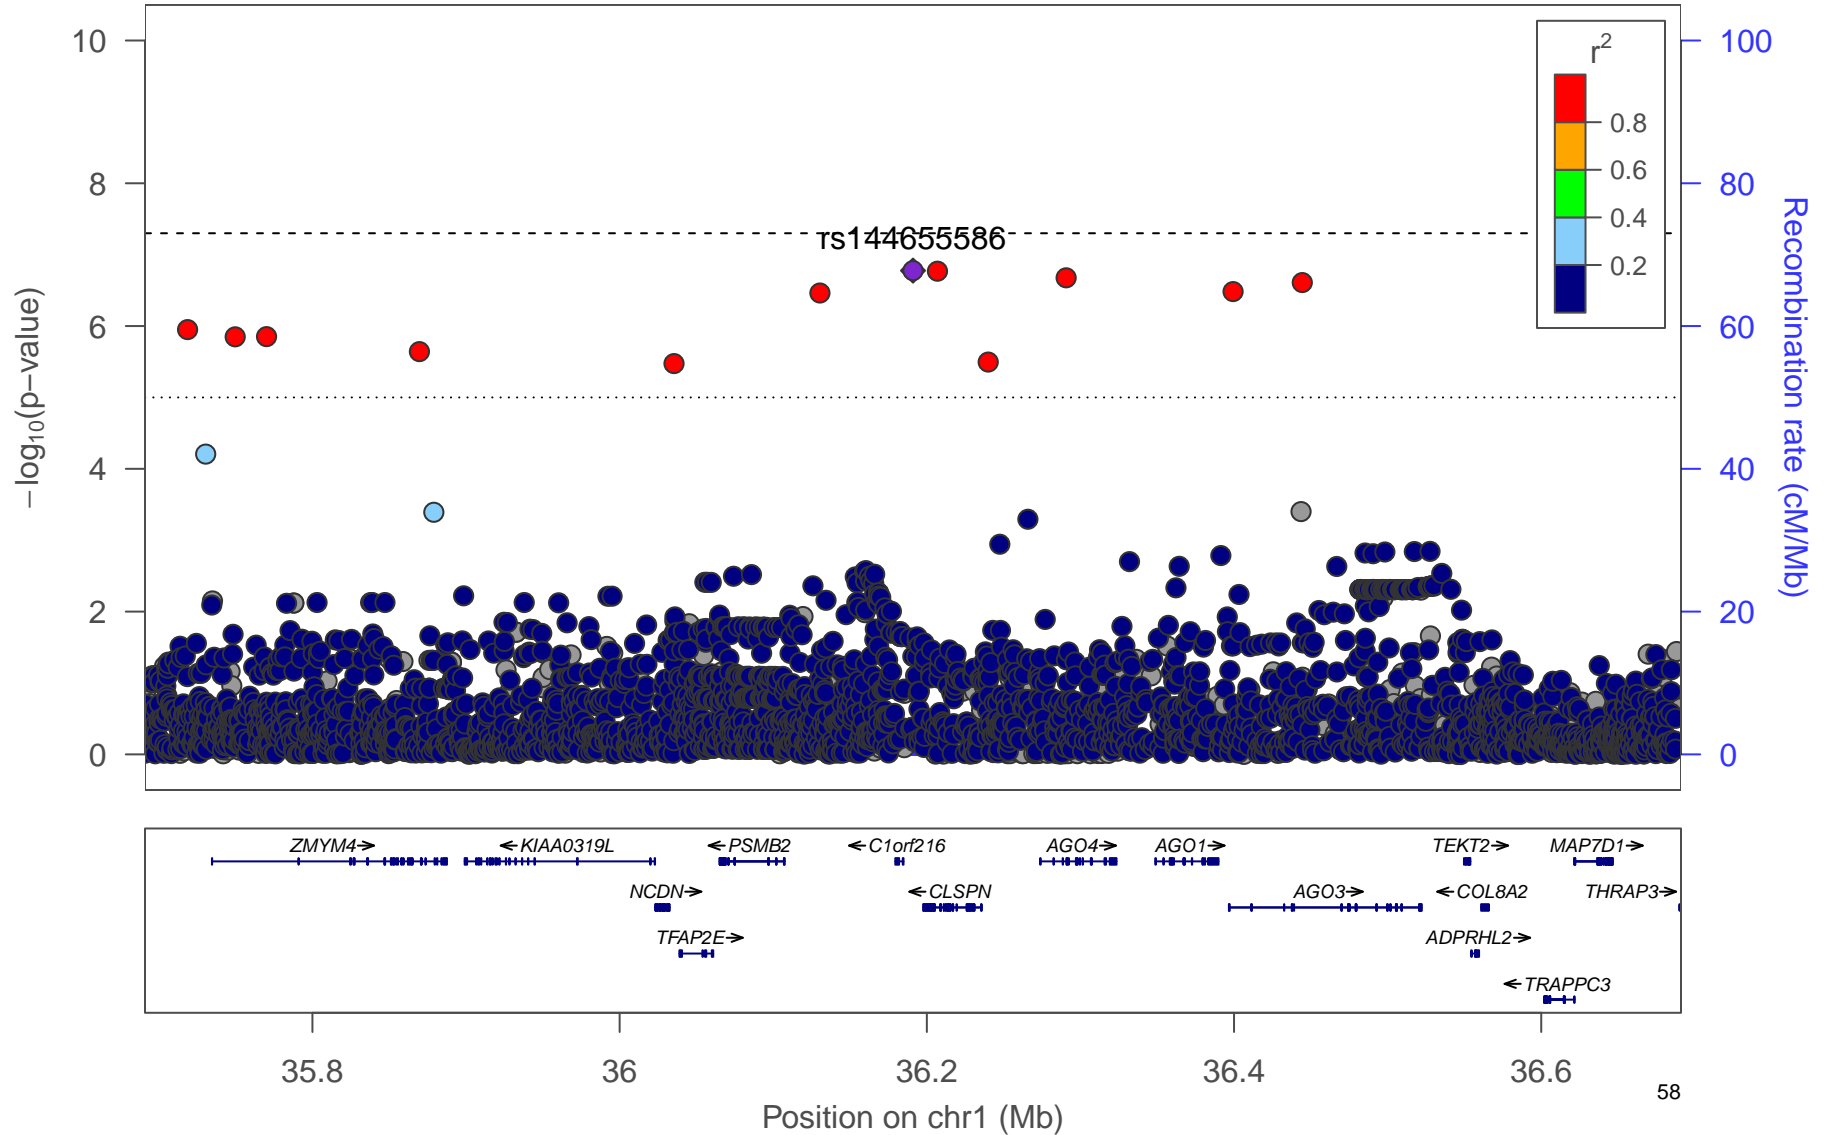

## b) HIPadjBMI All

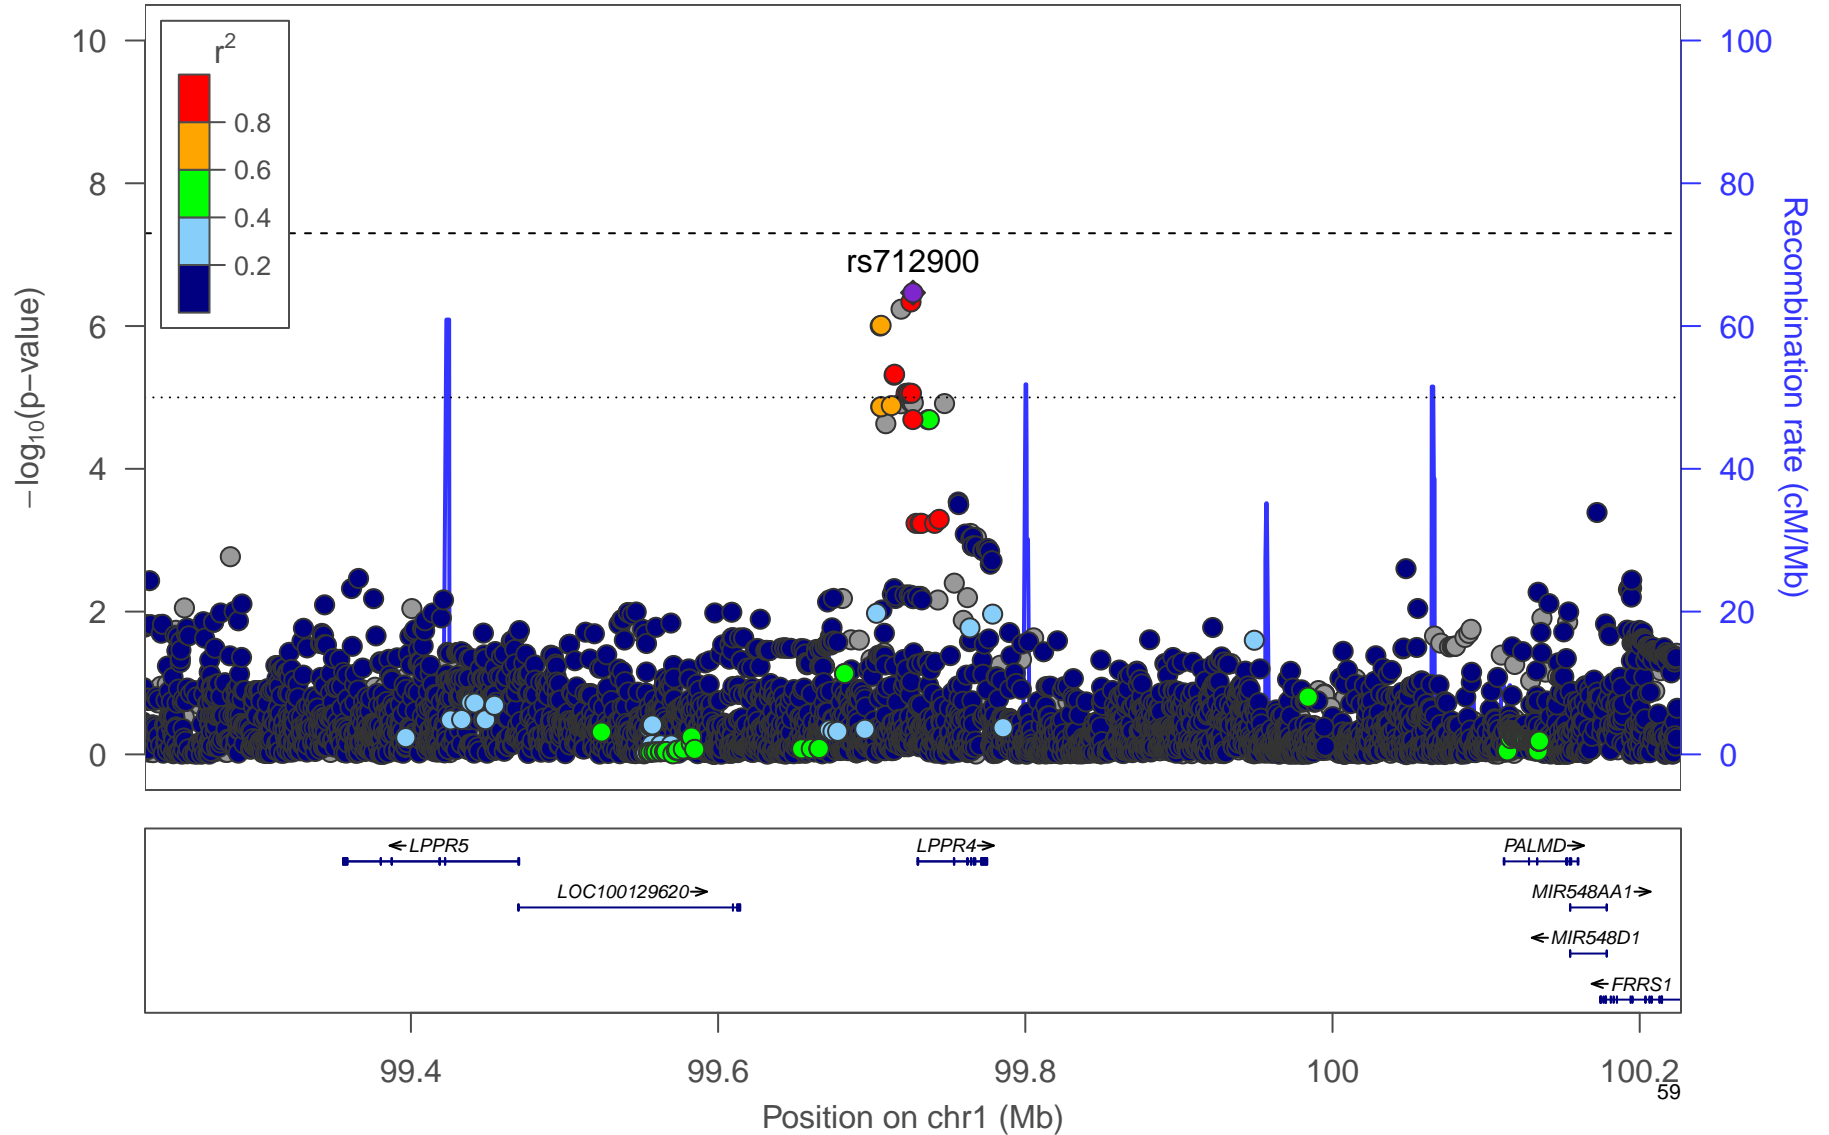

# c) HIPadjBMI All

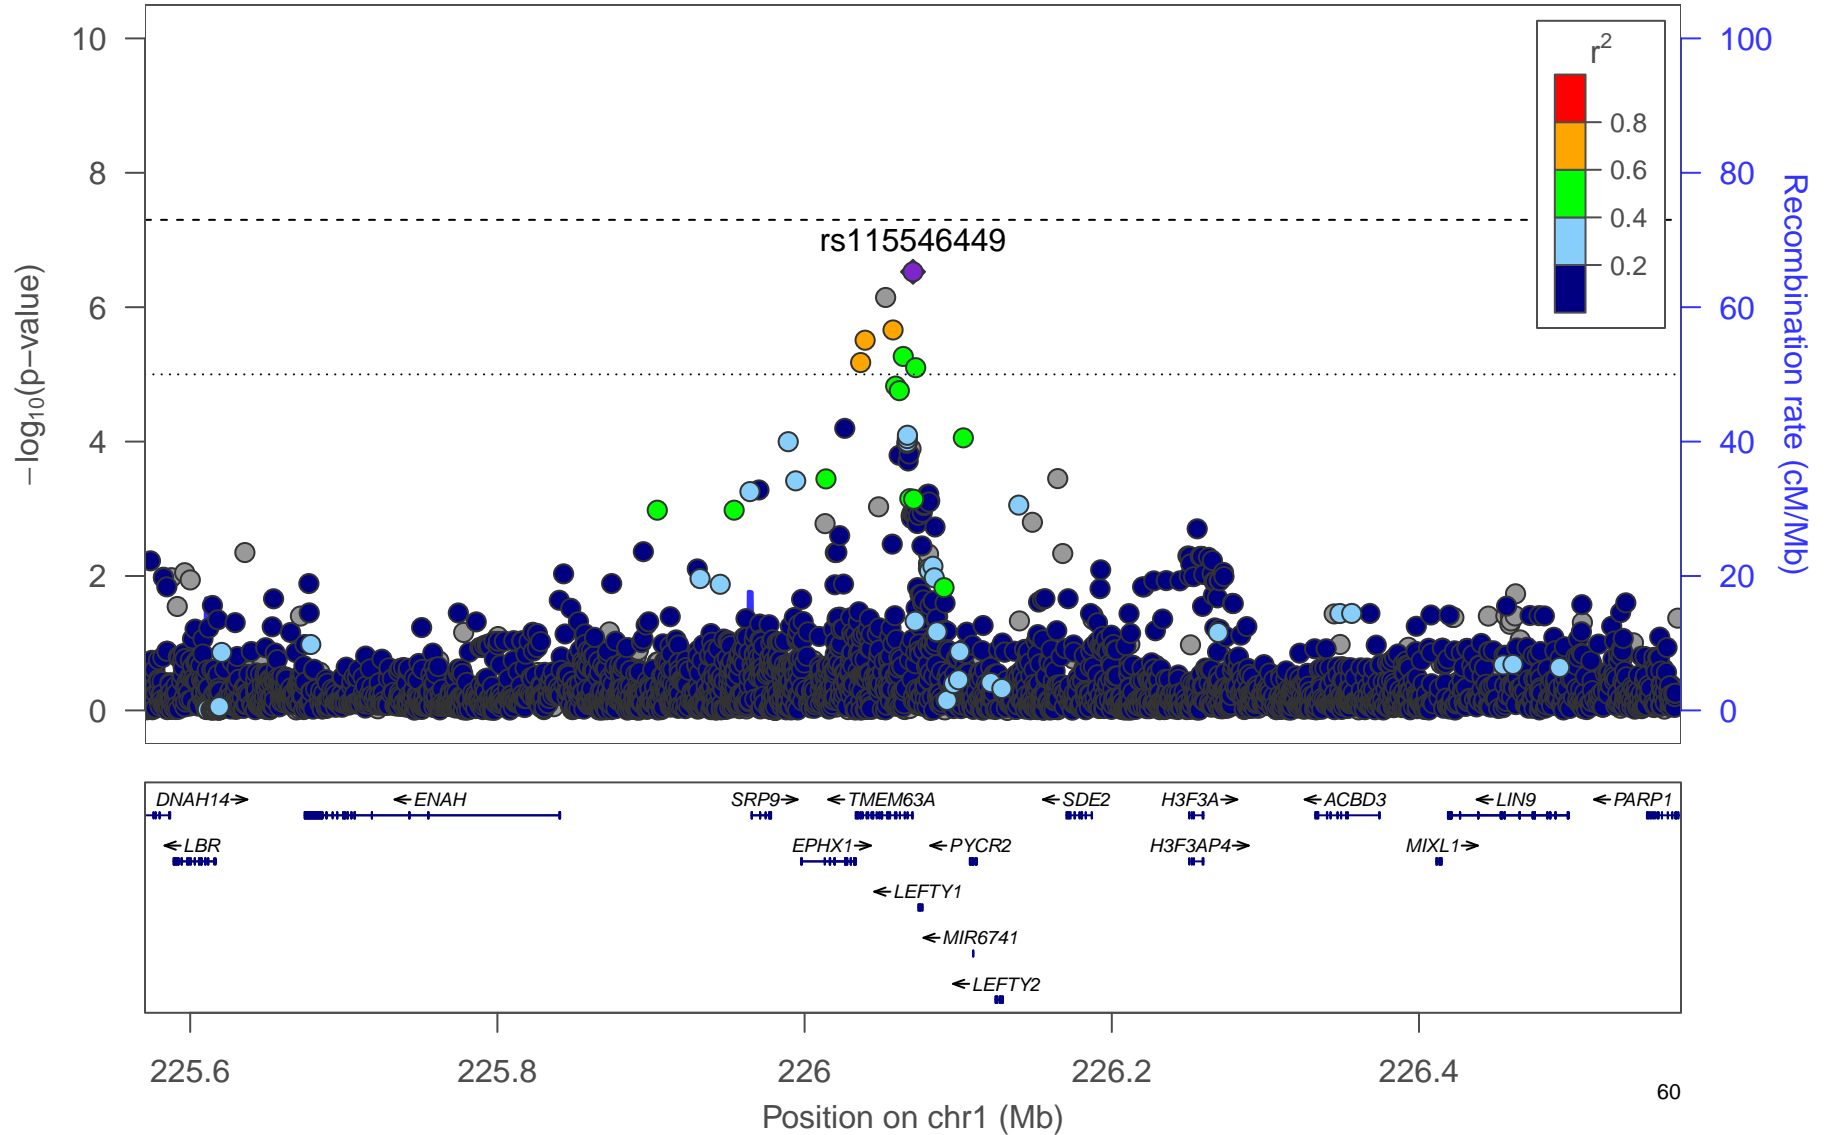

# d) HIPadjBMI All

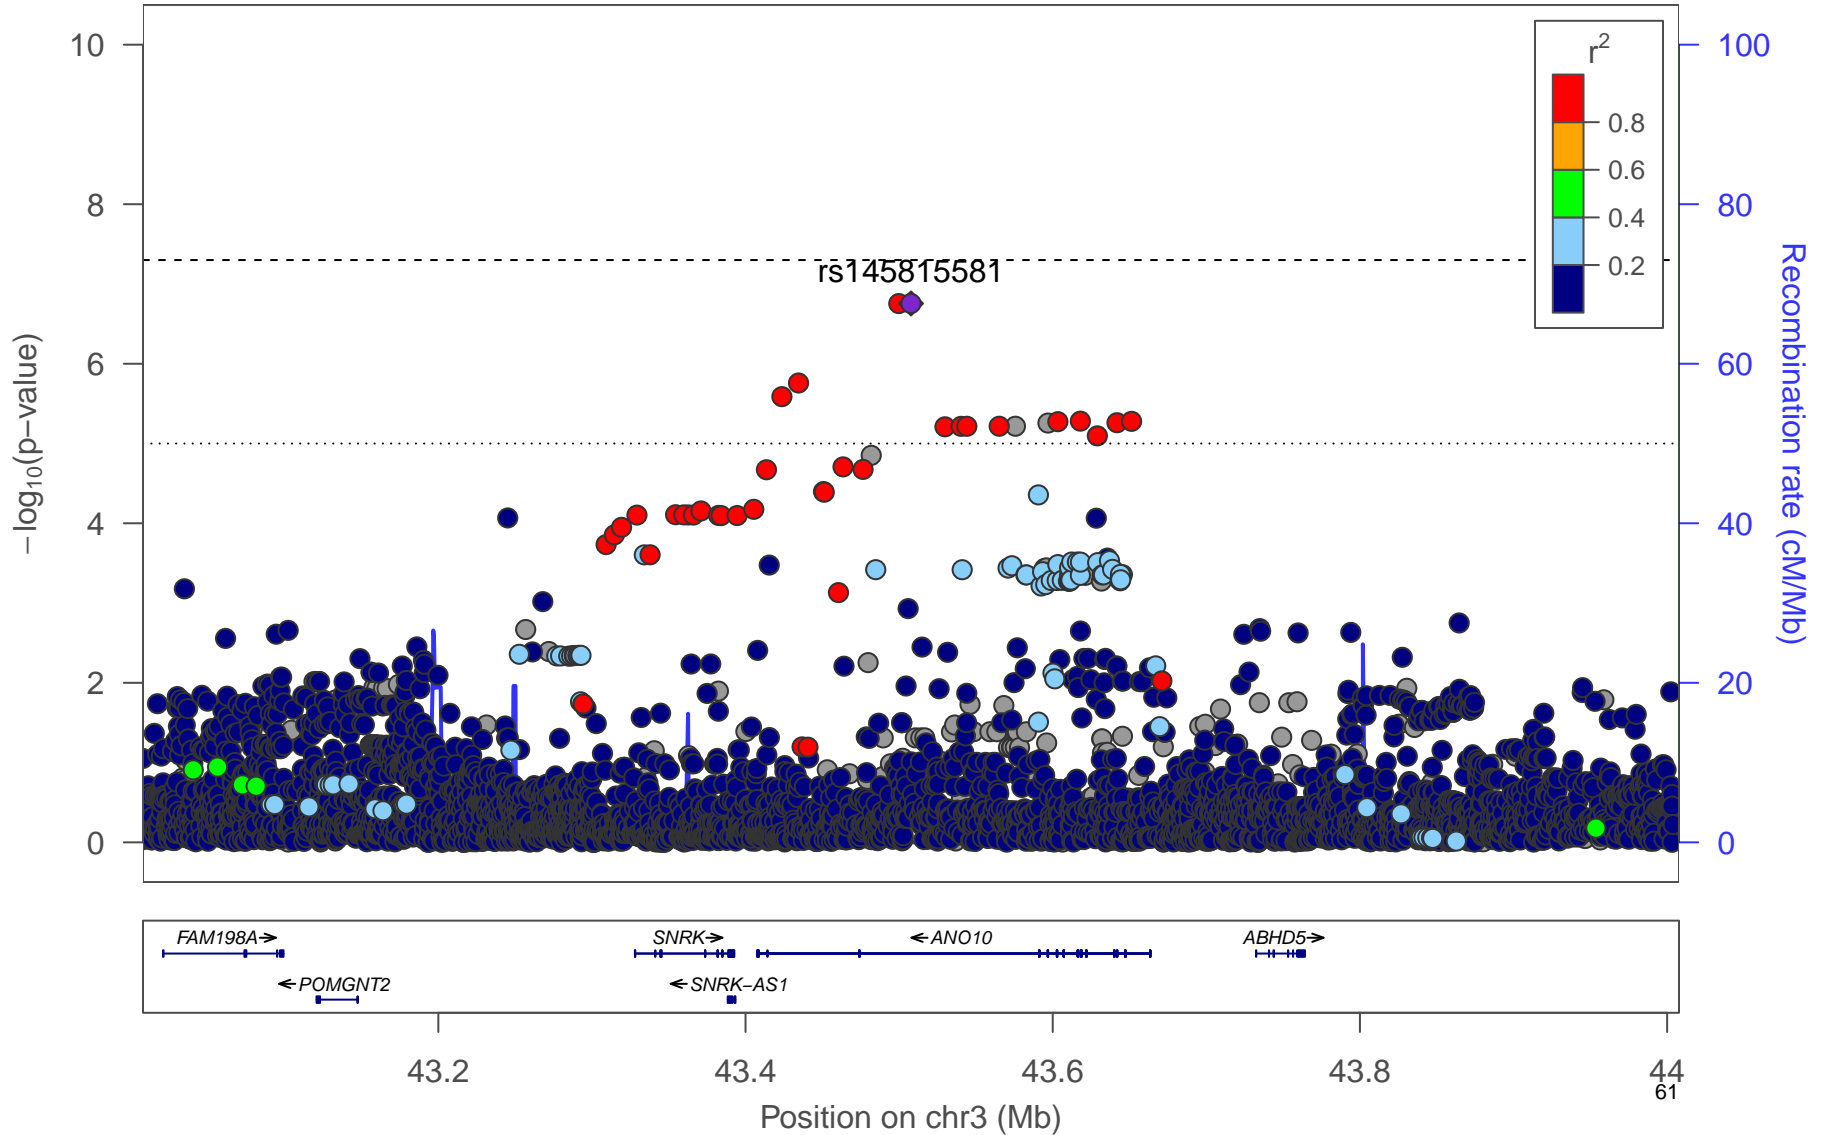

# e) HIPadjBMI All

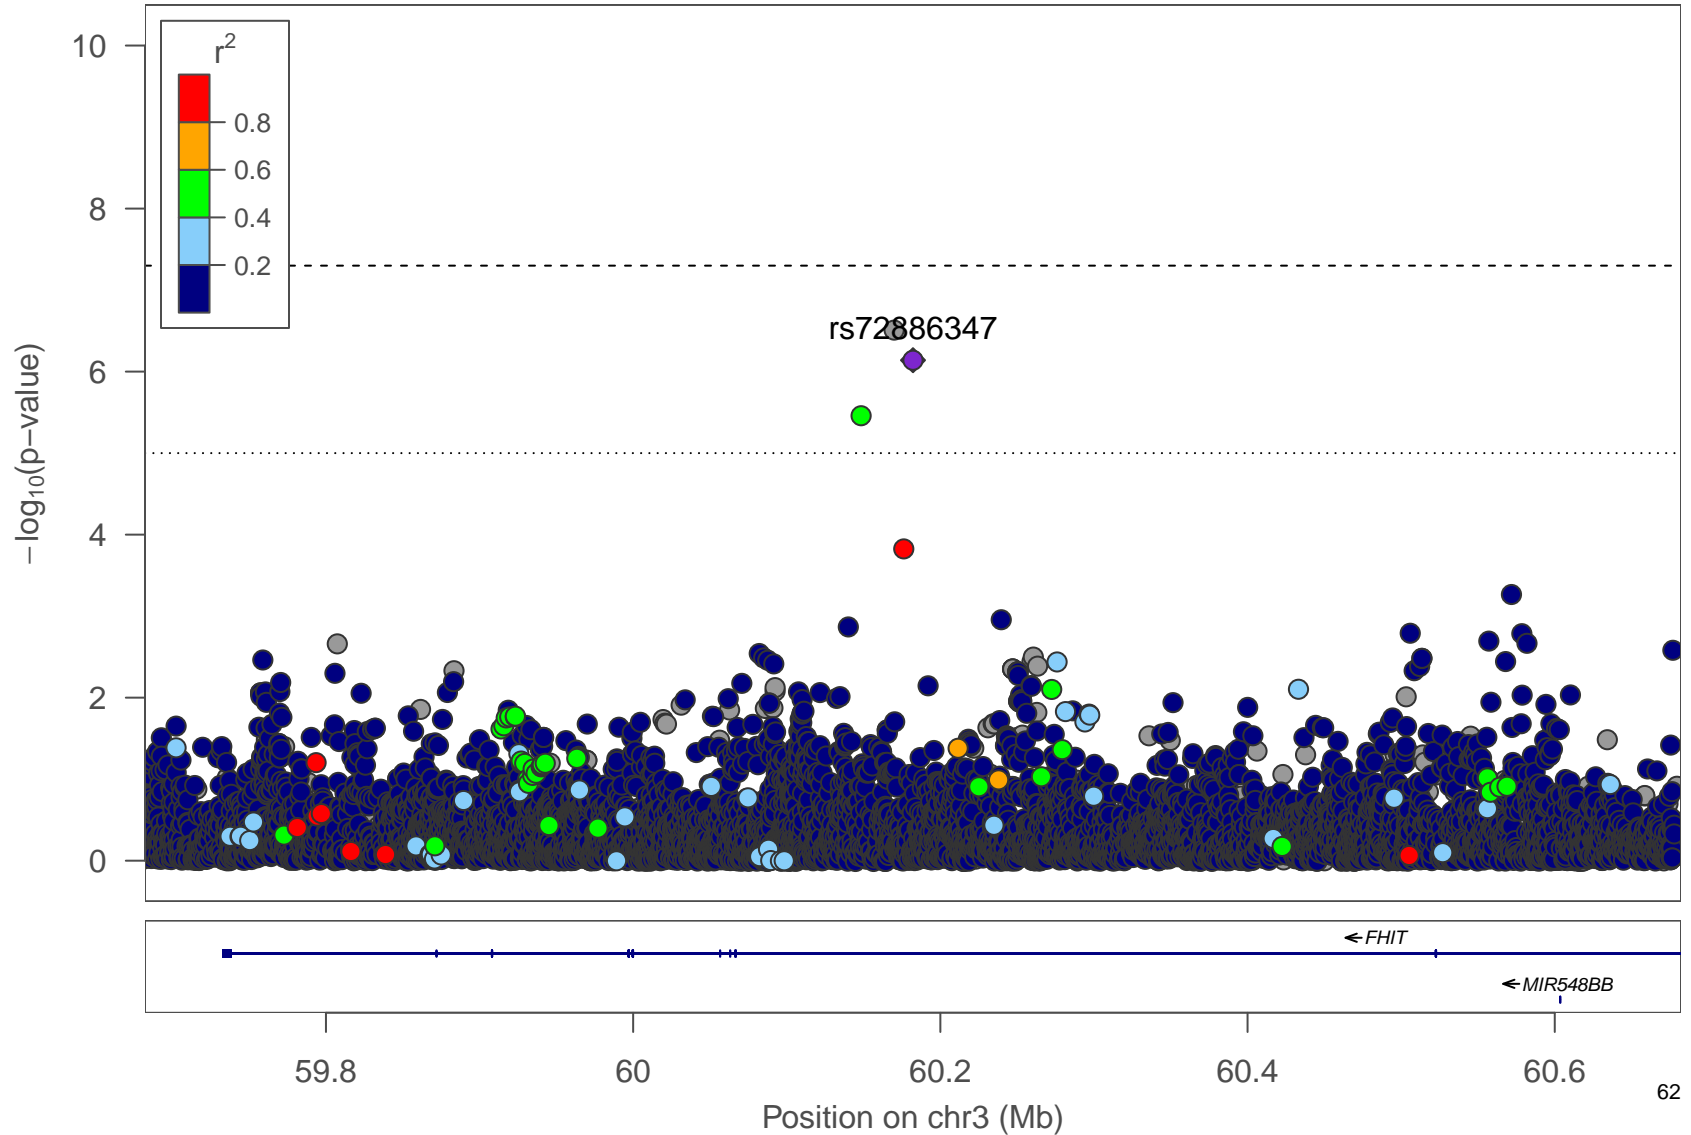

# f) HIPadjBMI All

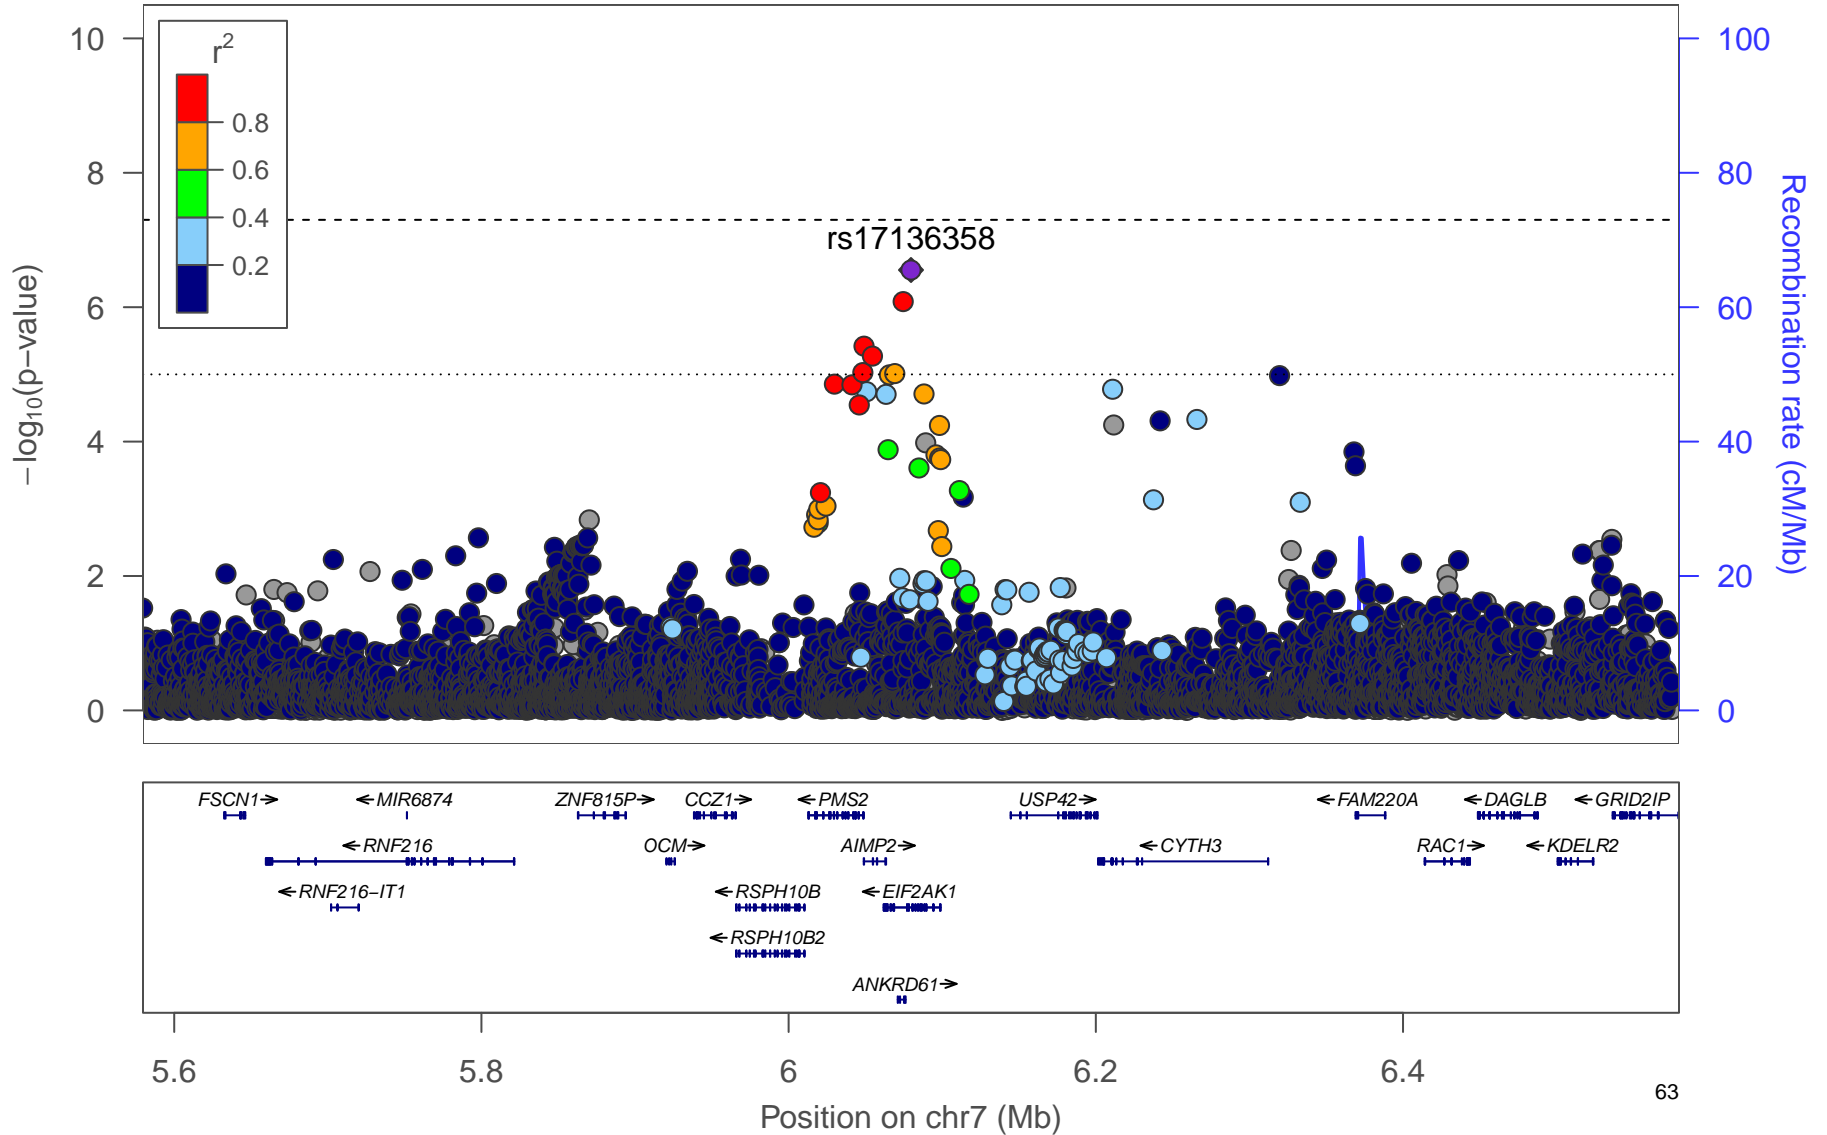

# g) HIPadjBMI All

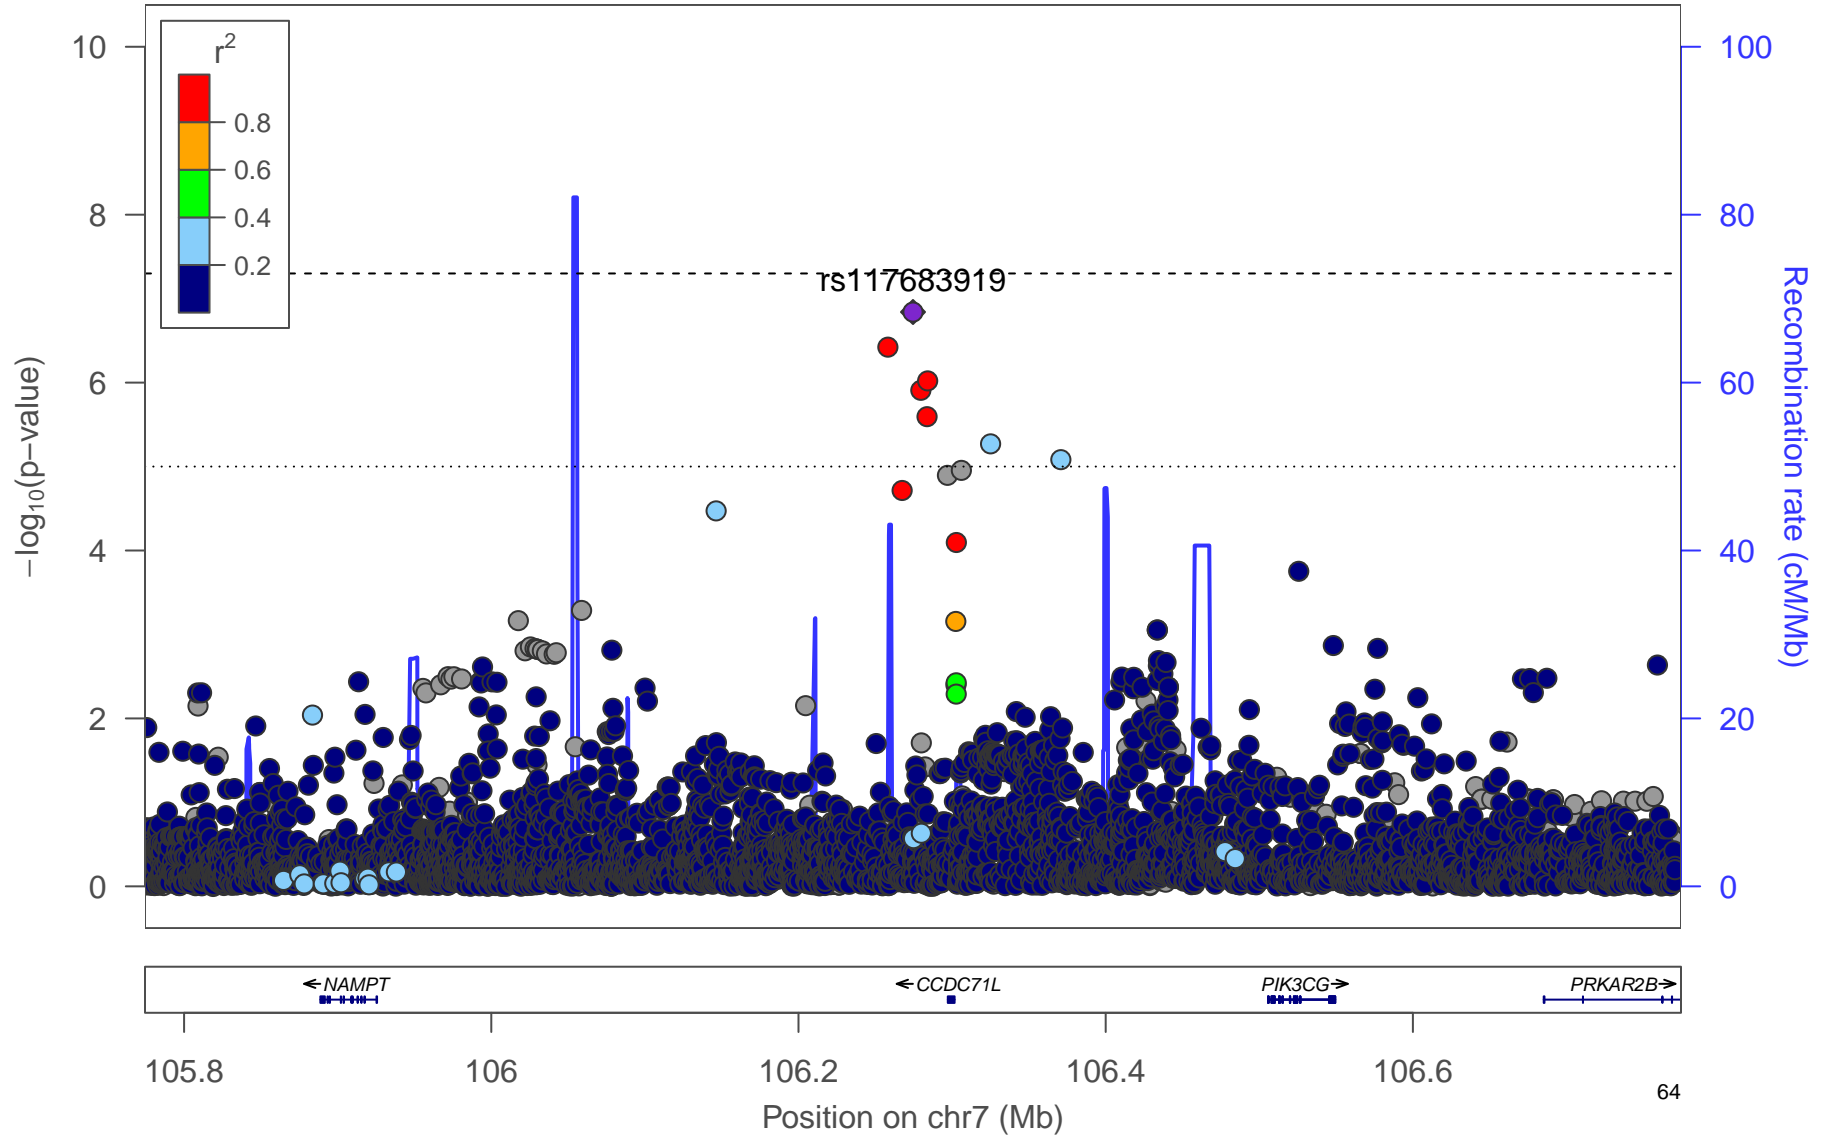



# h) HIPadjBMI All

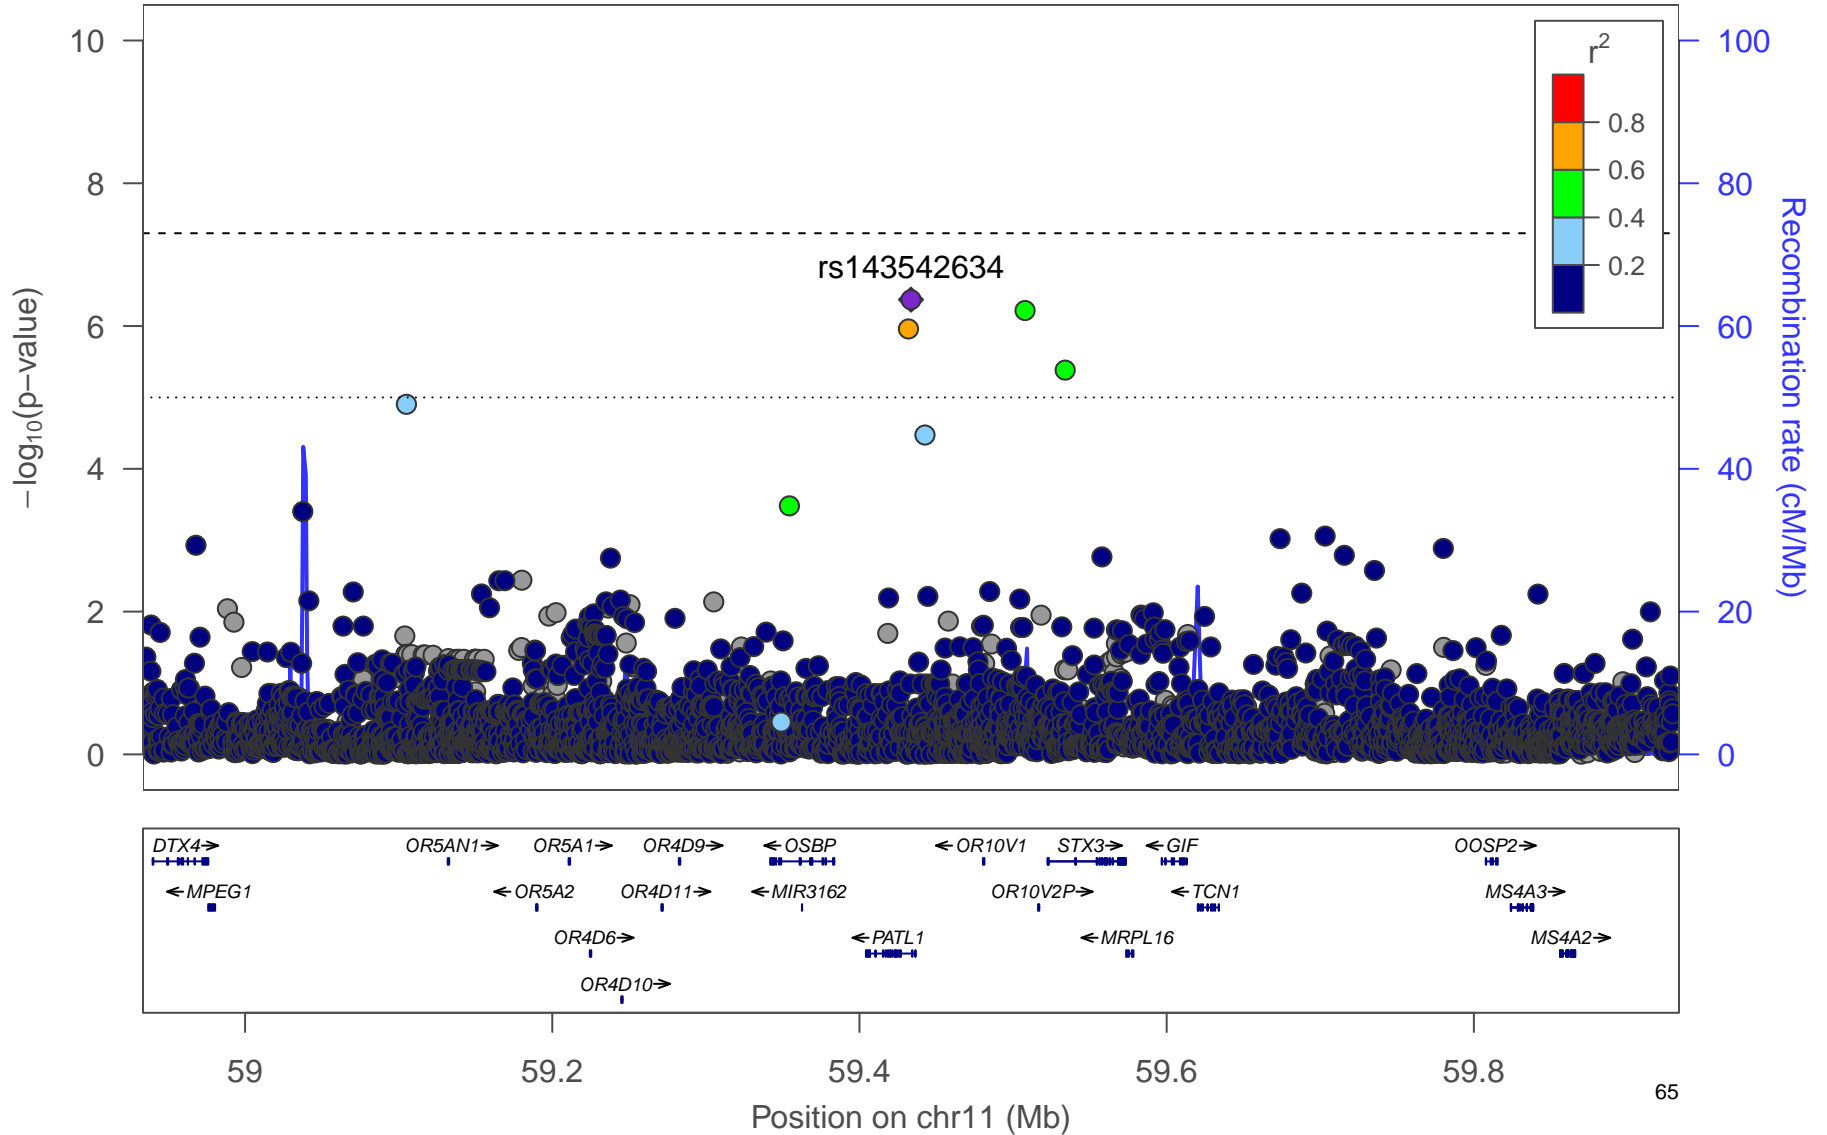

**Supplementary Figure 17. Manhattan plot.** Manhattan plot of the women-only analysis for HIPadjBMI. All suggestively significant ( $P < 1 \times 10^{-6}$ ) variants are highlighted in orange if they are  $> 500$  Kb from any previously-reported HIPadjBMI associated variants. Previously reported loci ( $\pm 500$  Kb) are highlighted in blue if any variant in the locus reached suggestive significance. All suggestively significant loci that meet our criteria for replication are annotated with the closest gene. † Replicated in African American meta-analysis. ‡ Replicated in Hispanic/Latino meta-analysis. ¥ Replicated in European American meta-analysis.

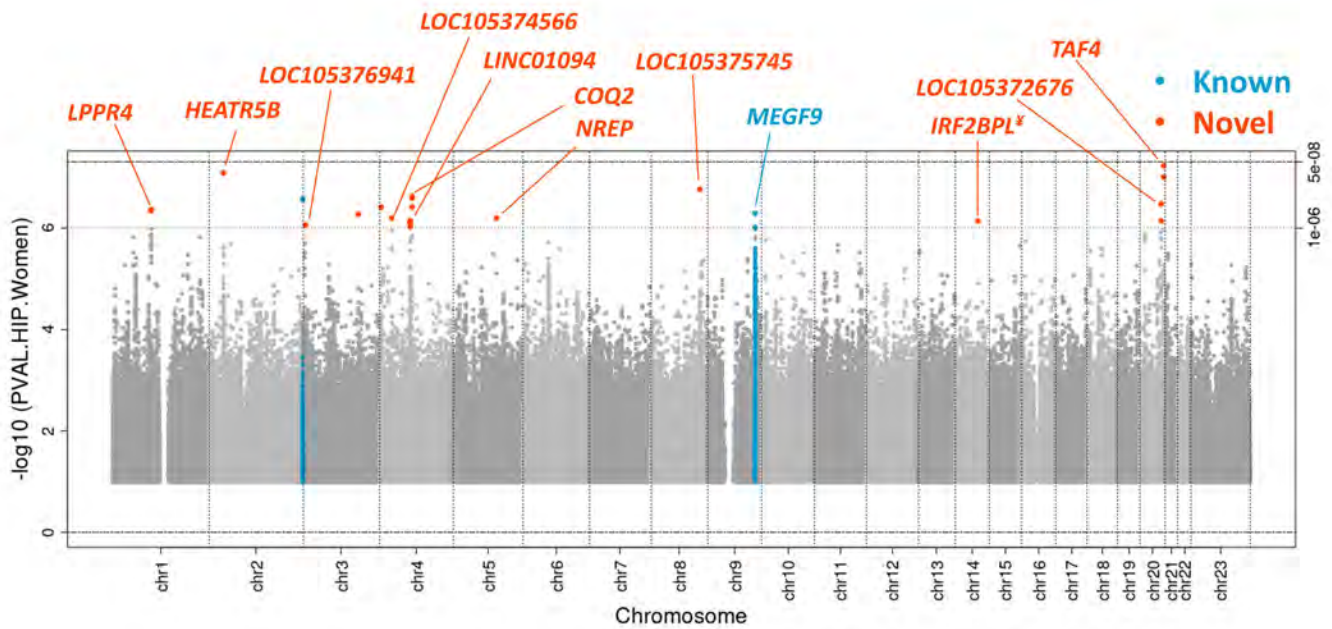

**Supplementary Figure 18. Locus Zoom Plots.** Regional association plots for suggestively significant loci in the HCHS/SOL HIPadjBMI women-only analysis. The plots appear in chromosome:position order. Dot color reflects  $R^2$  calculated from the 1000 Genomes AMR reference dataset. Point symbols represent variant functional classifications: a) rs72978809, *LPPR4*; b) rs12478843, *HEATR5B*; c) rs115331260, *LOC105376941*; d) rs7662640, *LOC105374566*; e) rs6814739, *LINC01094*; f) rs11099588, *COQ2*; g) rs6860625, *NREP*; h) rs77186623, *LOC105375745*; i) rs10818474, *MEGF9*; j) rs28692724, *IRF2BPL*; k) rs6092086, *LOC105372676*; l) rs9631175, *TAF4*.

# a) HIPadjBMI Women

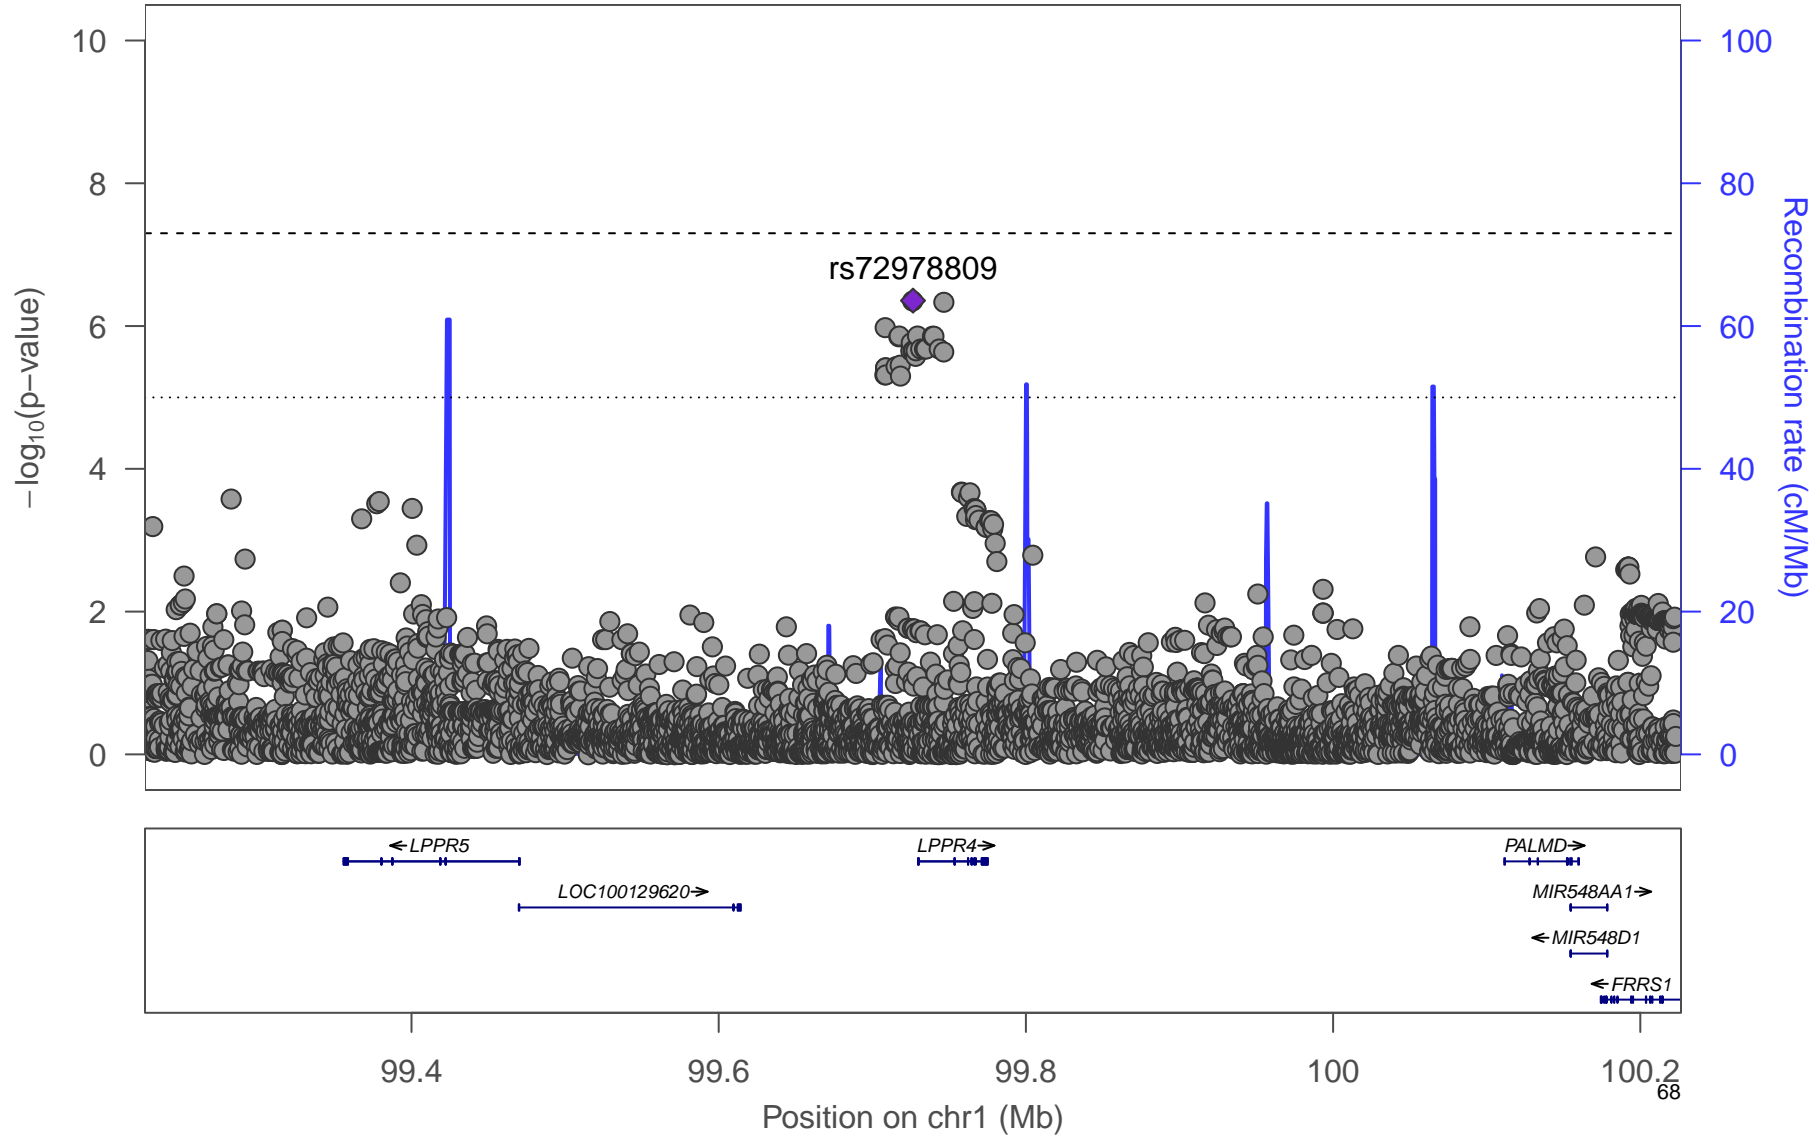

## b) HIPadjBMI Women

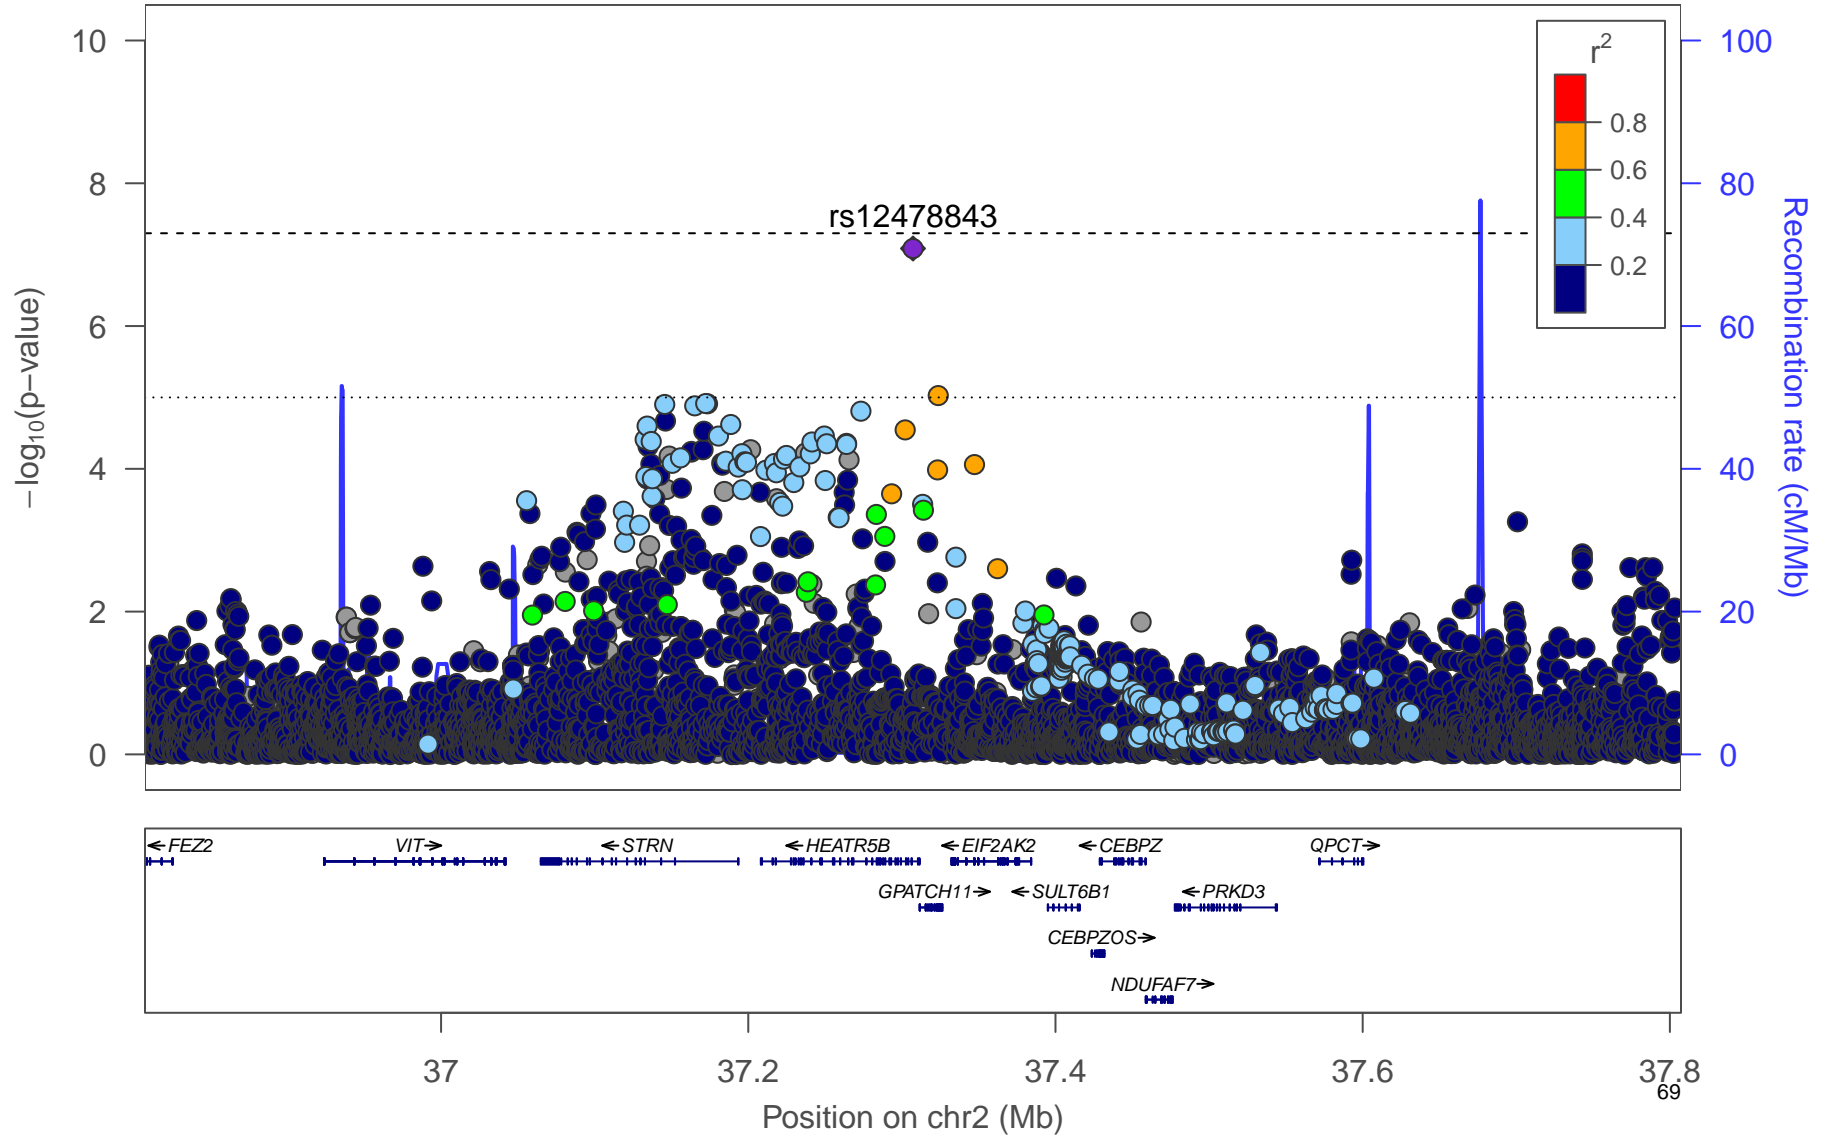

# c) HIPadjBMI Women

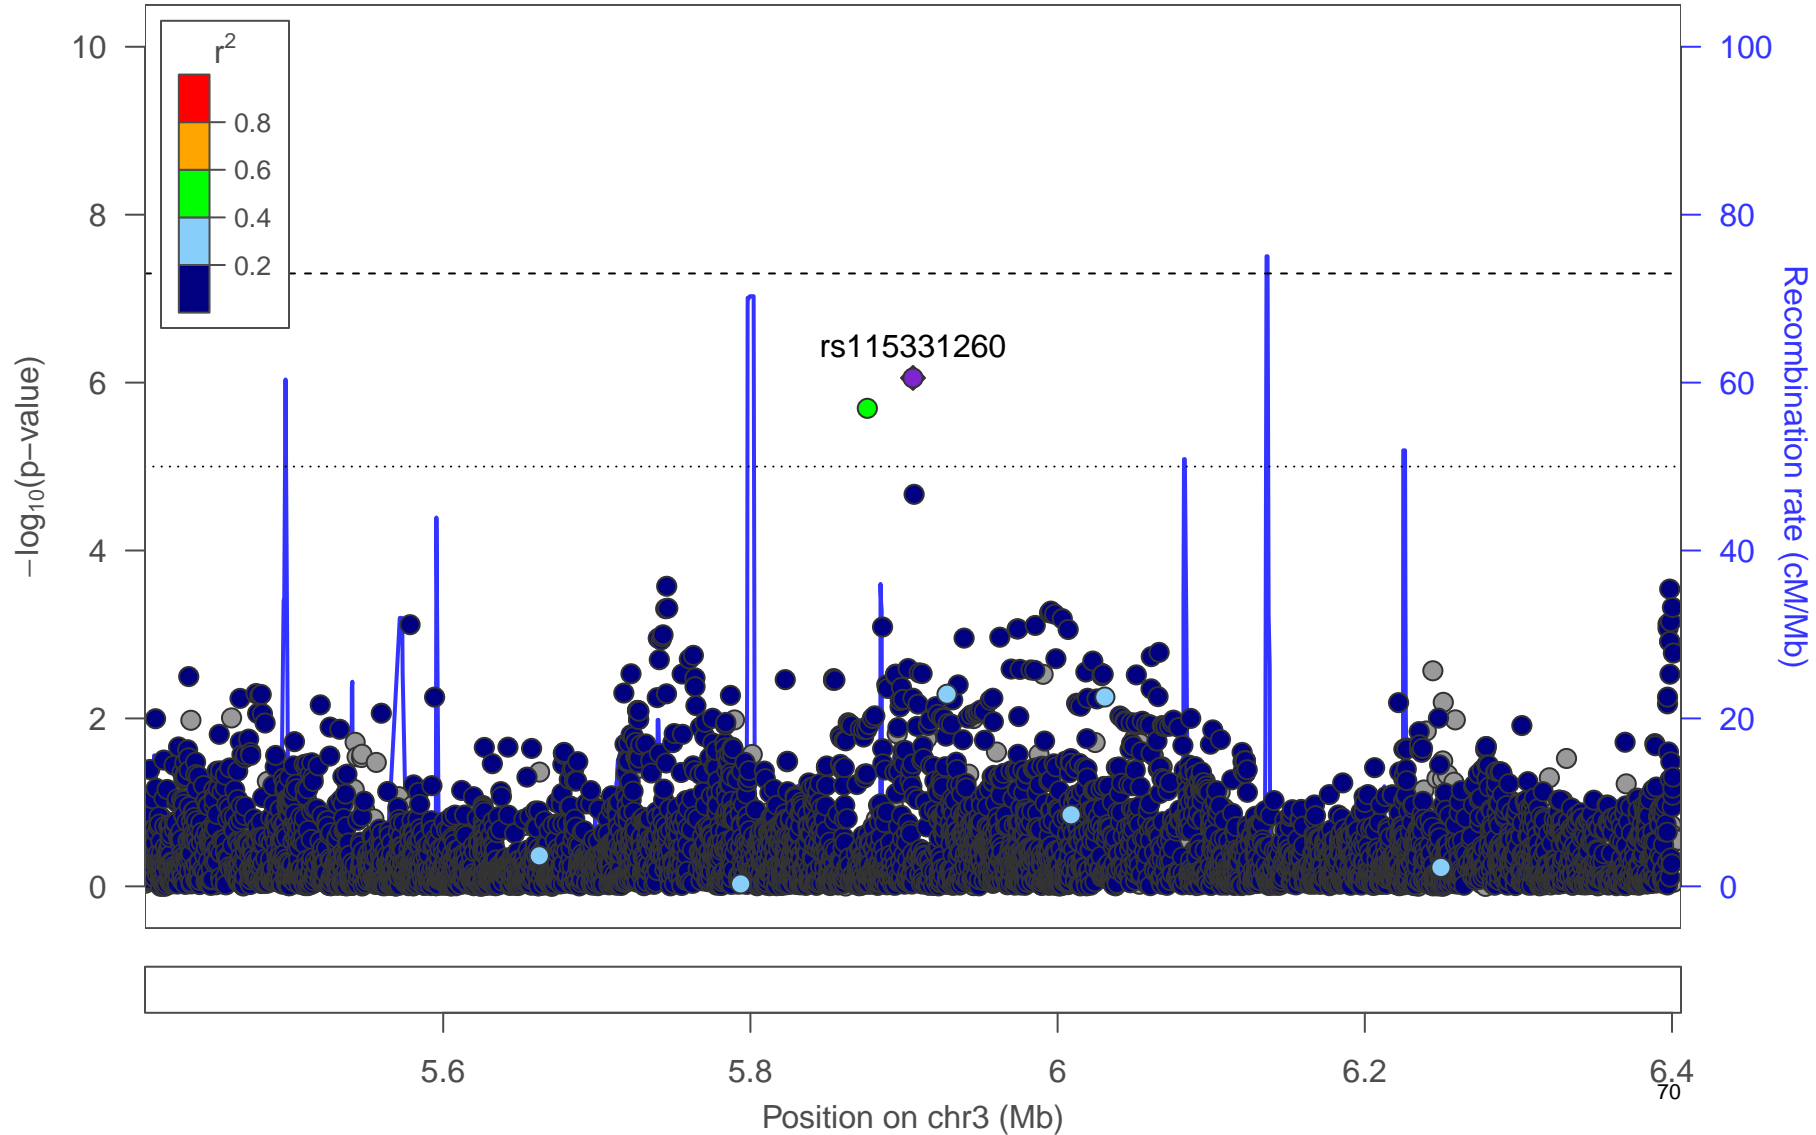

# d) HIPadjBMI Women

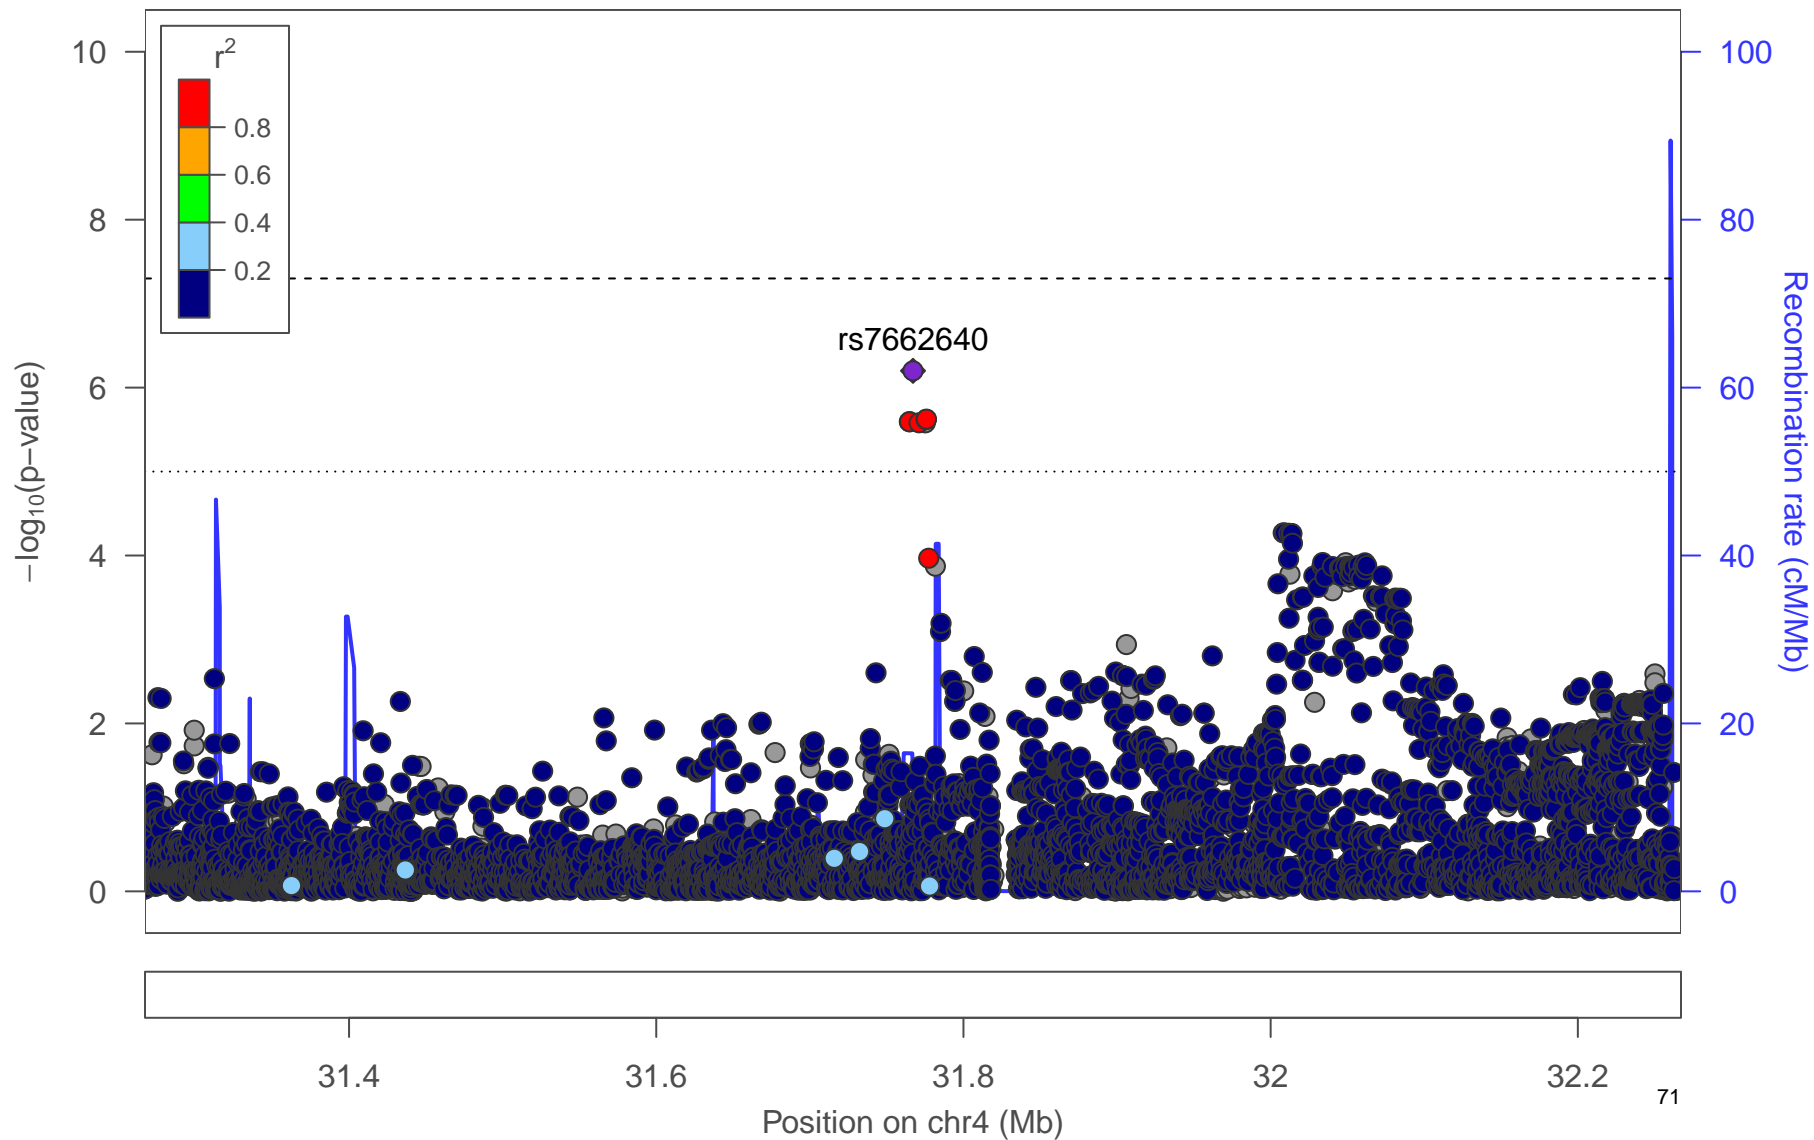

# e) HIPadjBMI Women

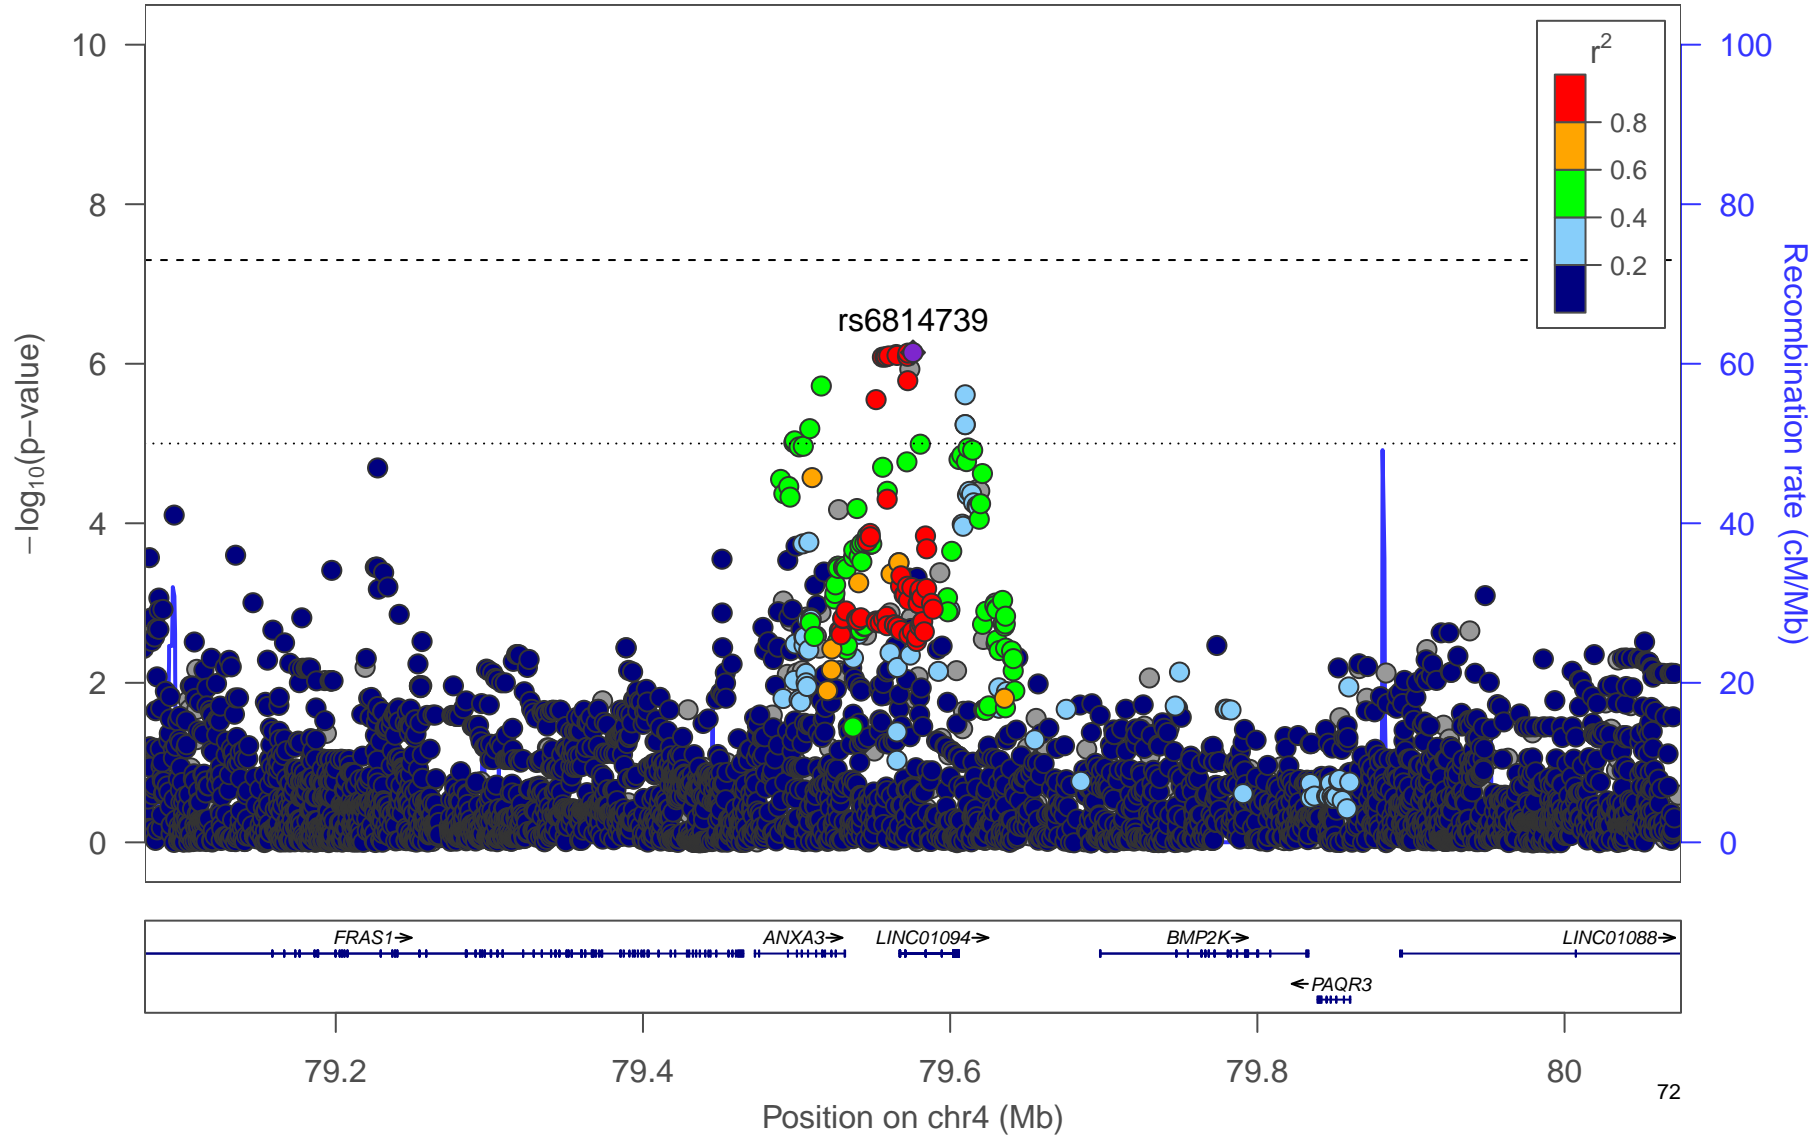



# f) HIPadjBMI Women

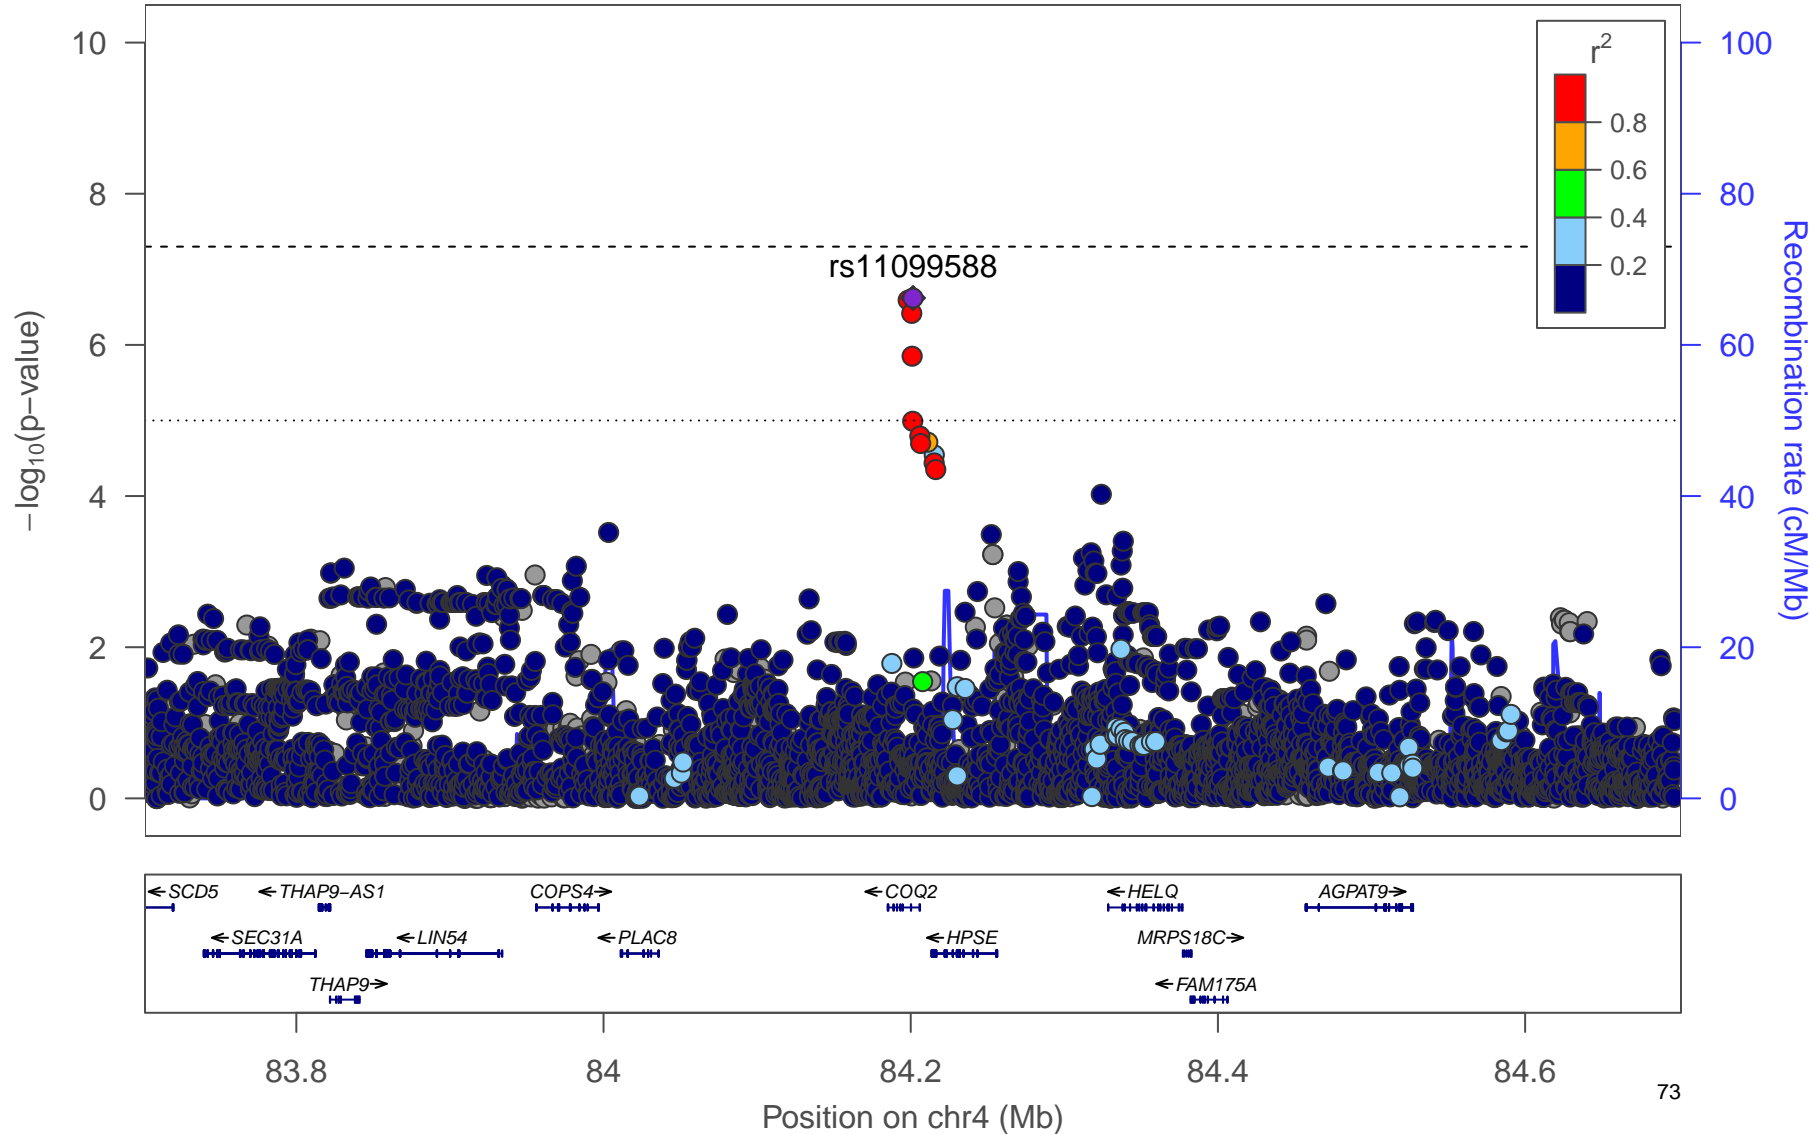

# g) HIPadjBMI Women

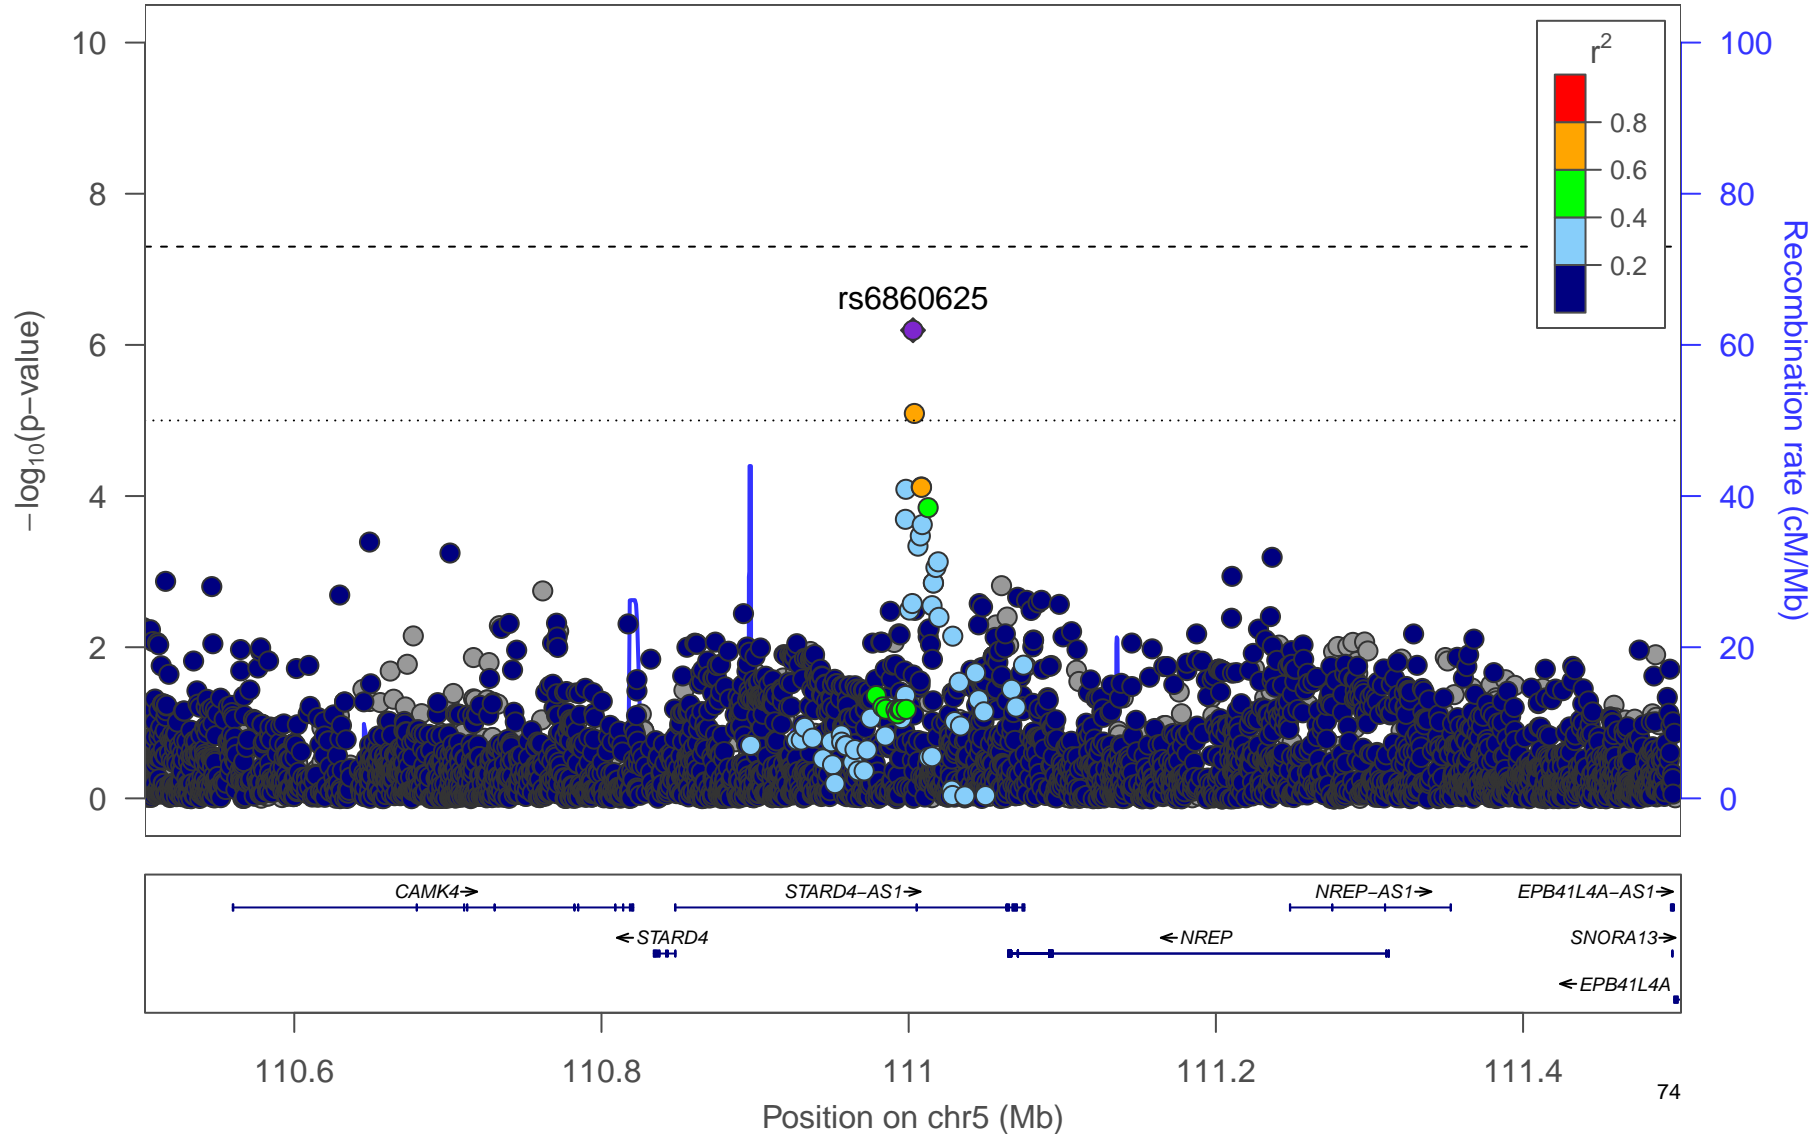

# h) HIPadjBMI Women

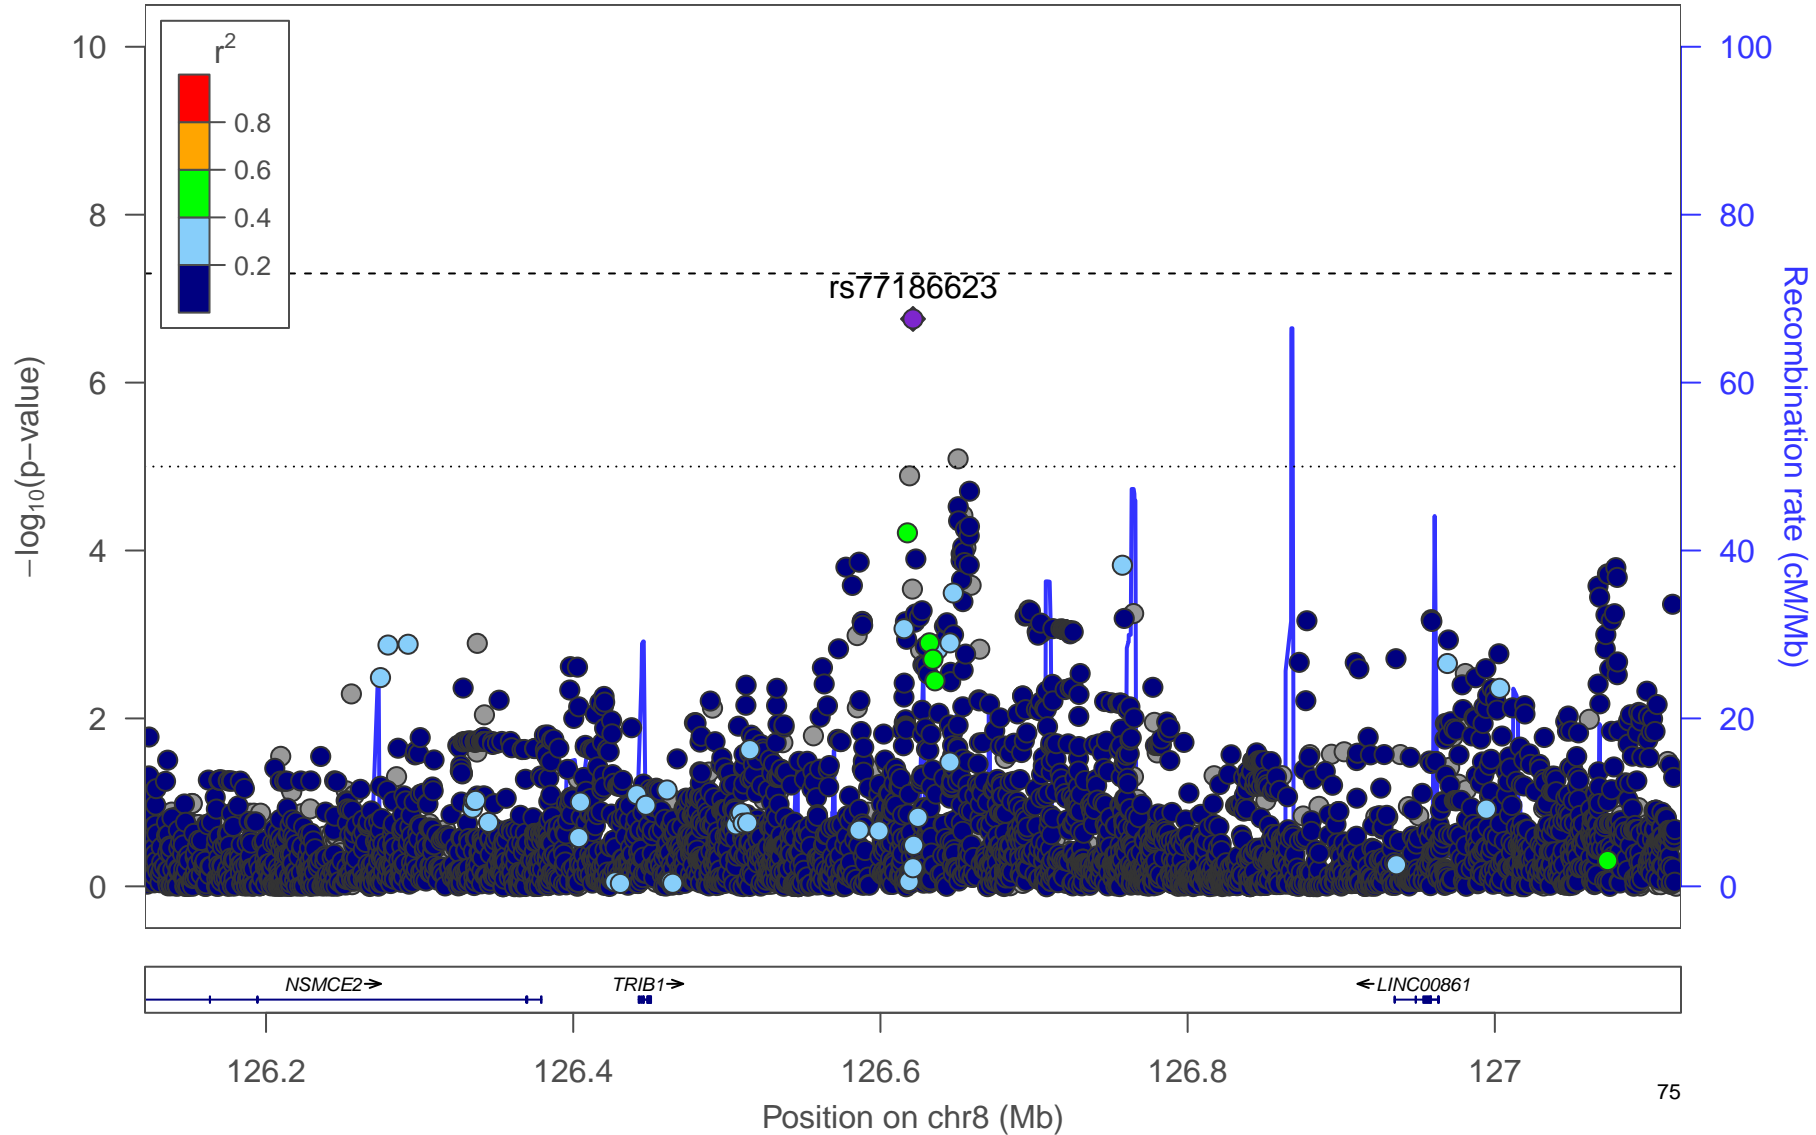

# i) HIPadjBMI Women

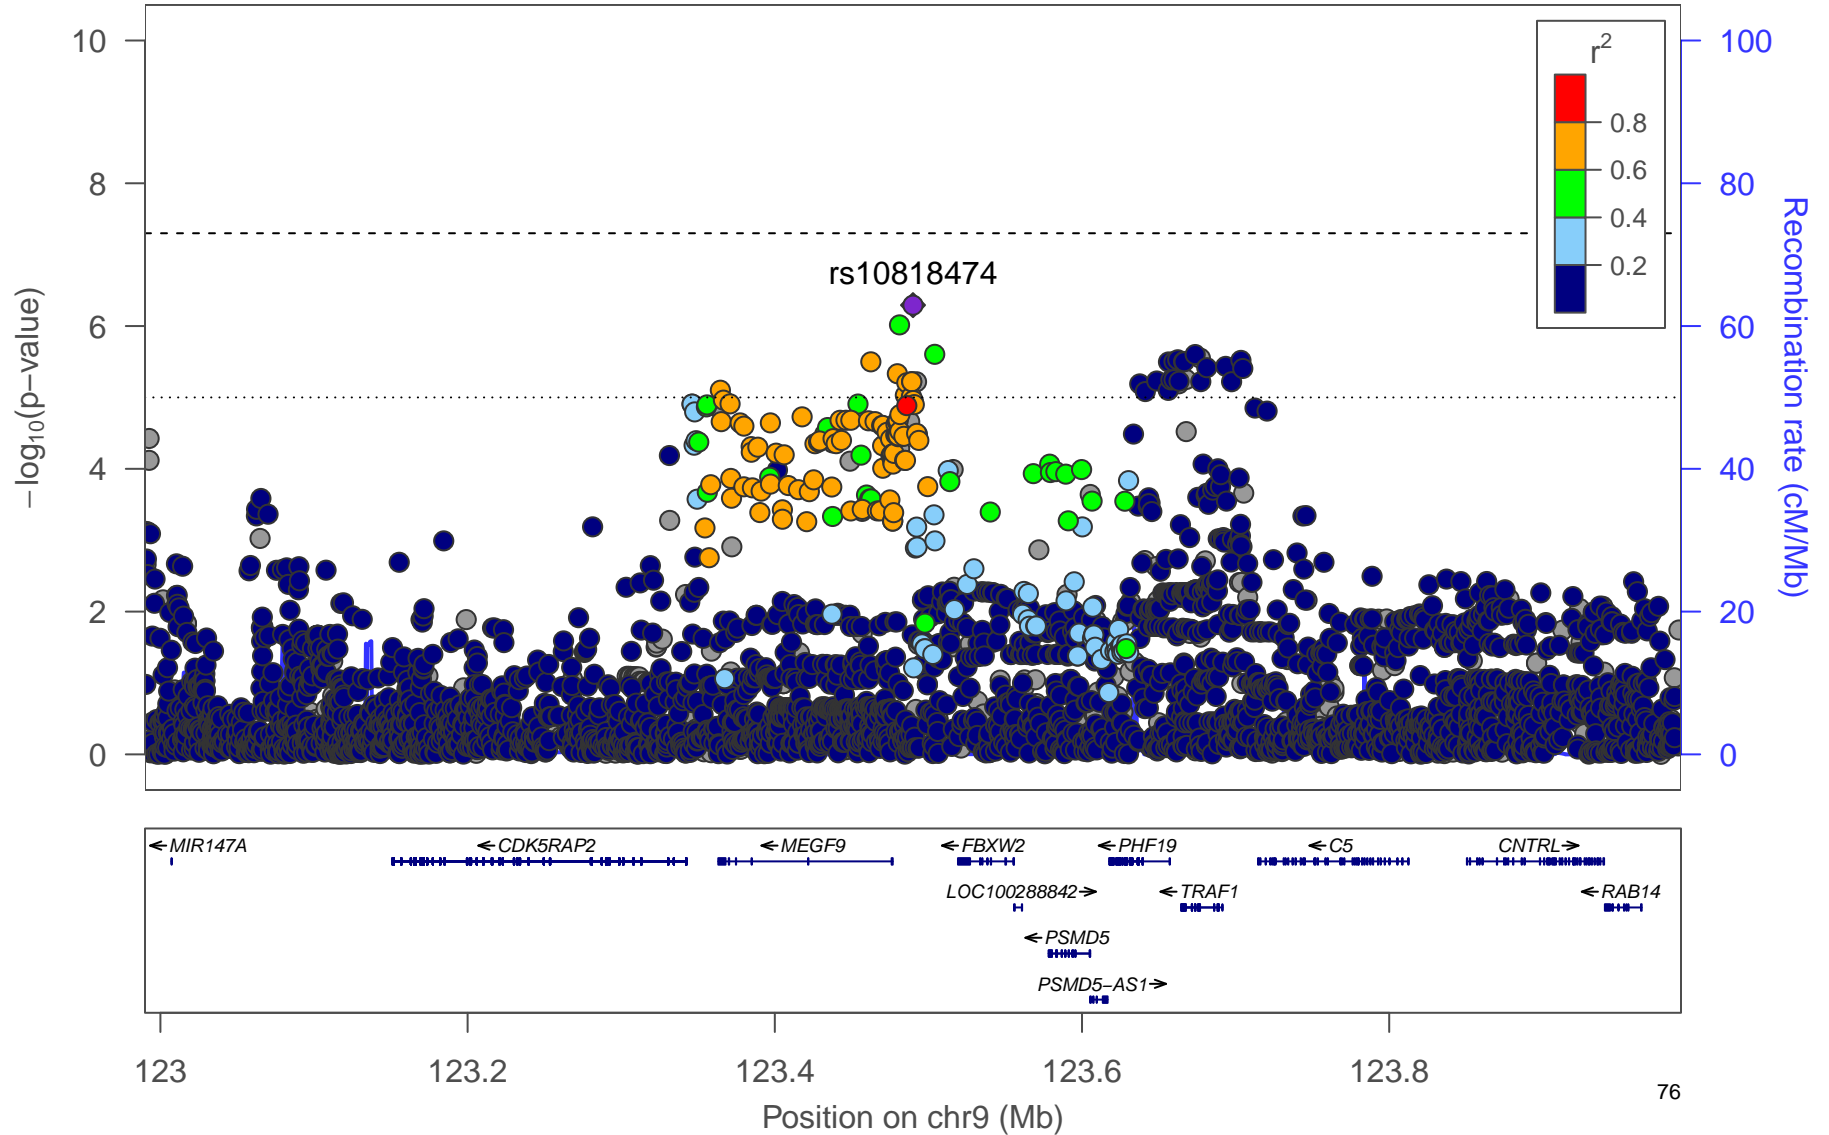

# j) HIPadjBMI Women

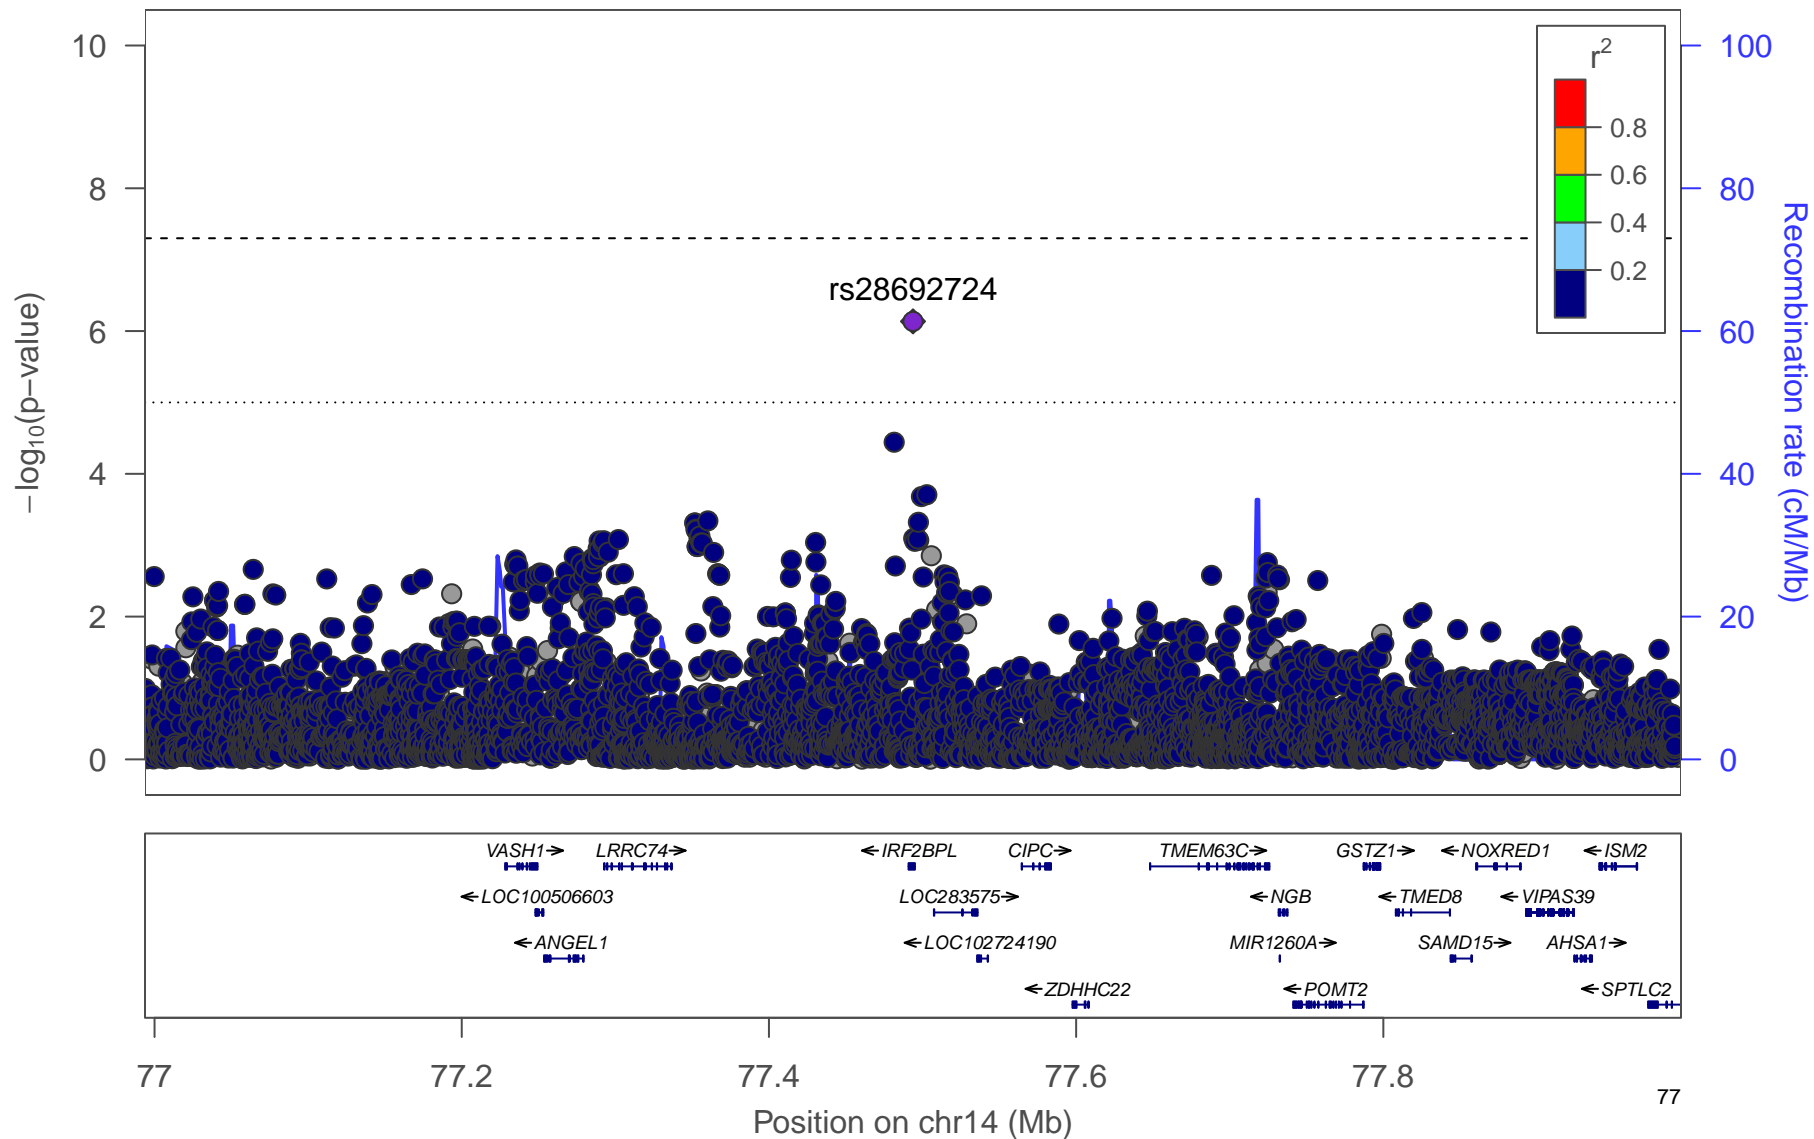

# k) HIPadjBMI Women

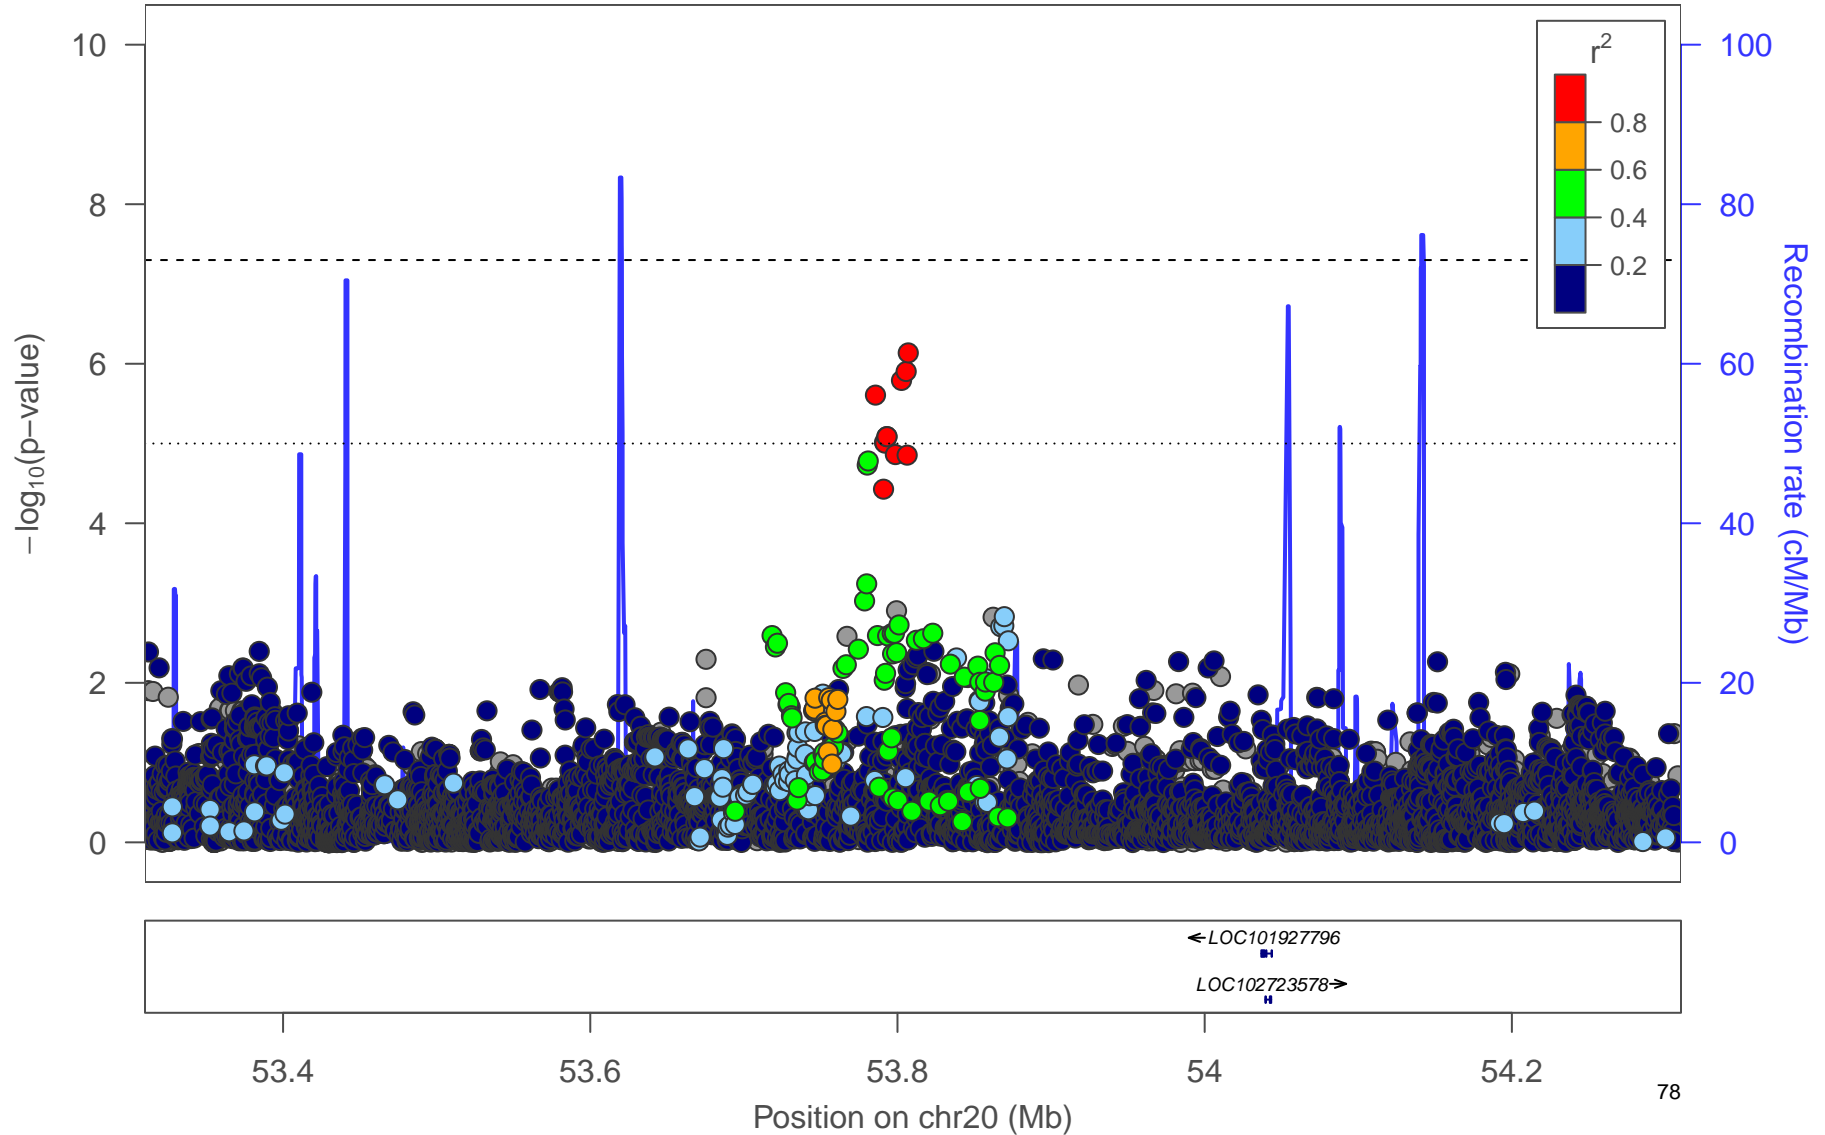

# I) HIPadjBMI Women

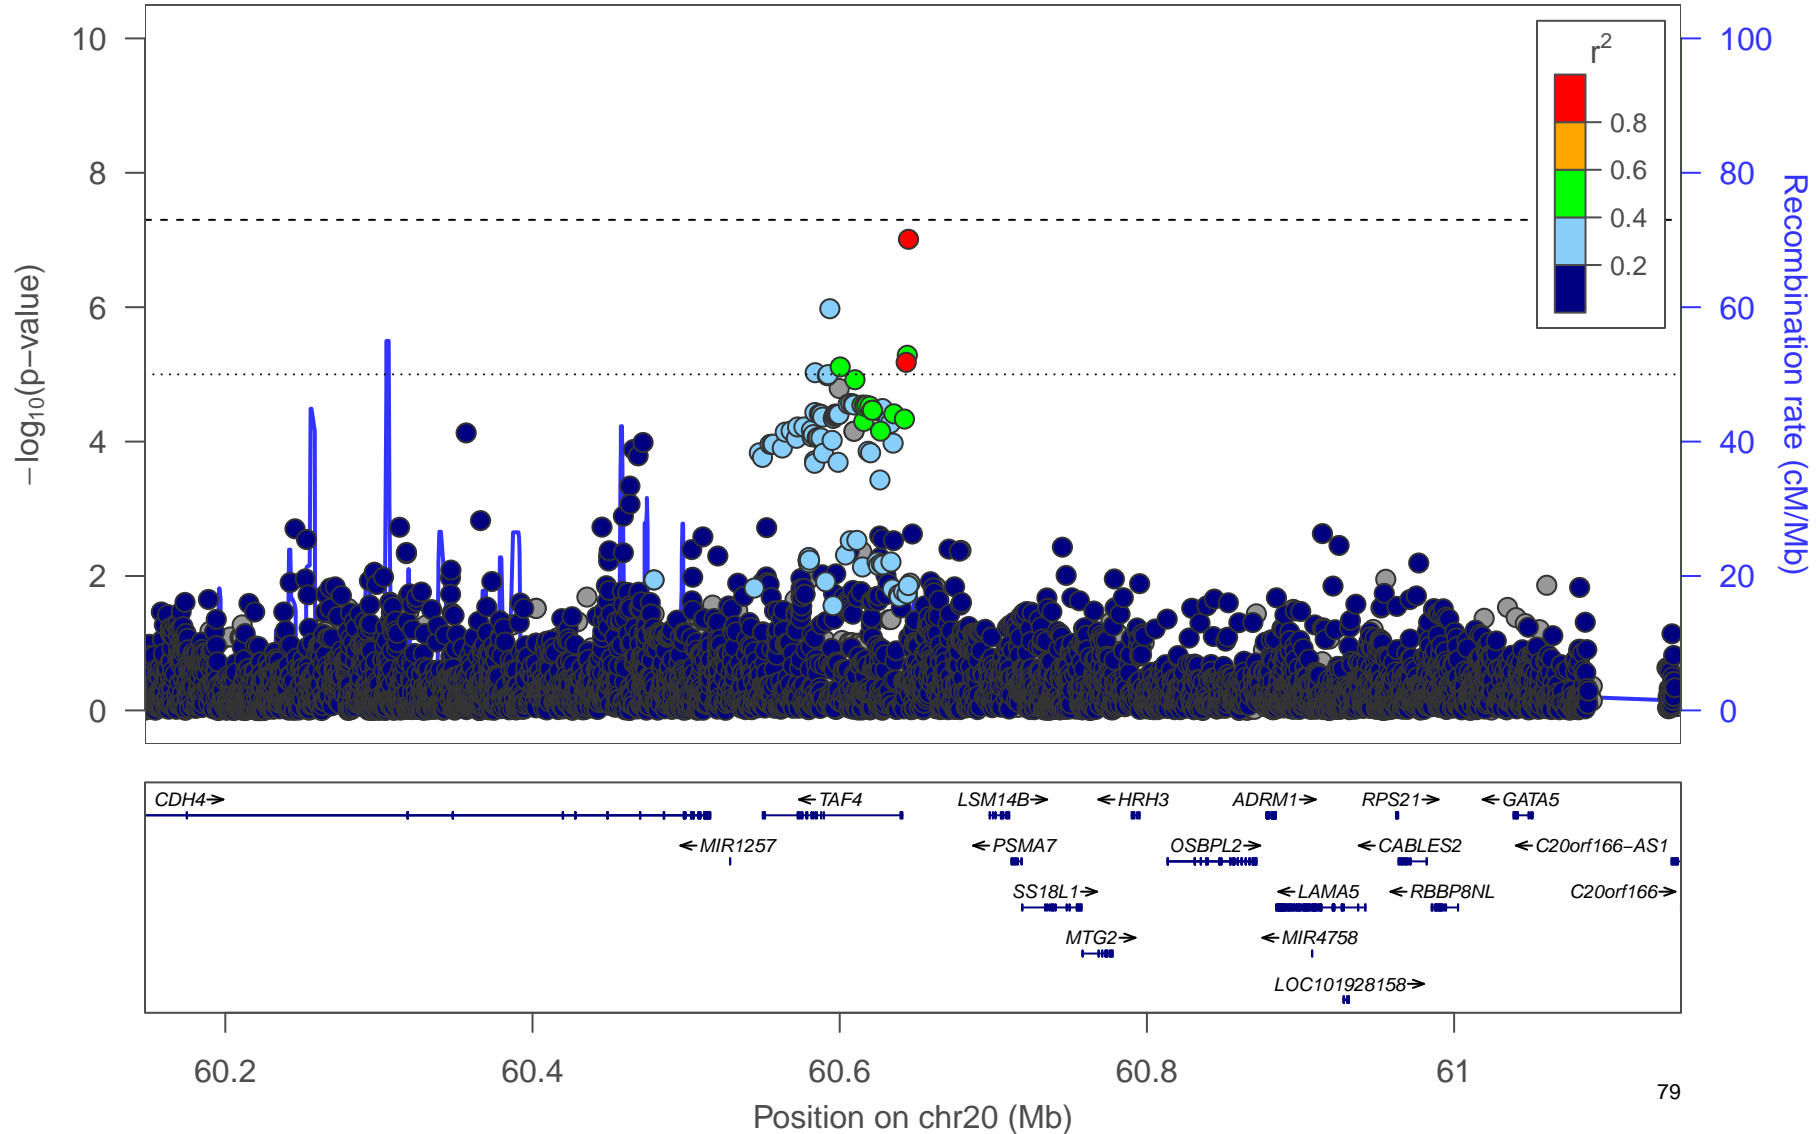



**Supplementary Figure 19. Manhattan plot.** Manhattan plot of the men-only analysis for HIPadjBMI. All suggestively significant ( $P < 1 \times 10^{-6}$ ) variants are highlighted in orange if they are >500 Kb from any previously-reported HIPadjBMI associated variants. Previously reported loci (+/- 500 Kb) are highlighted in blue if any variant in the locus reached suggestive significance. All suggestively significant loci that meet our criteria for replication are annotated with the closest gene. † Replicated in African American meta-analysis. ‡ Replicated in Hispanic/Latino meta-analysis. ¥ Replicated in European American meta-analysis.

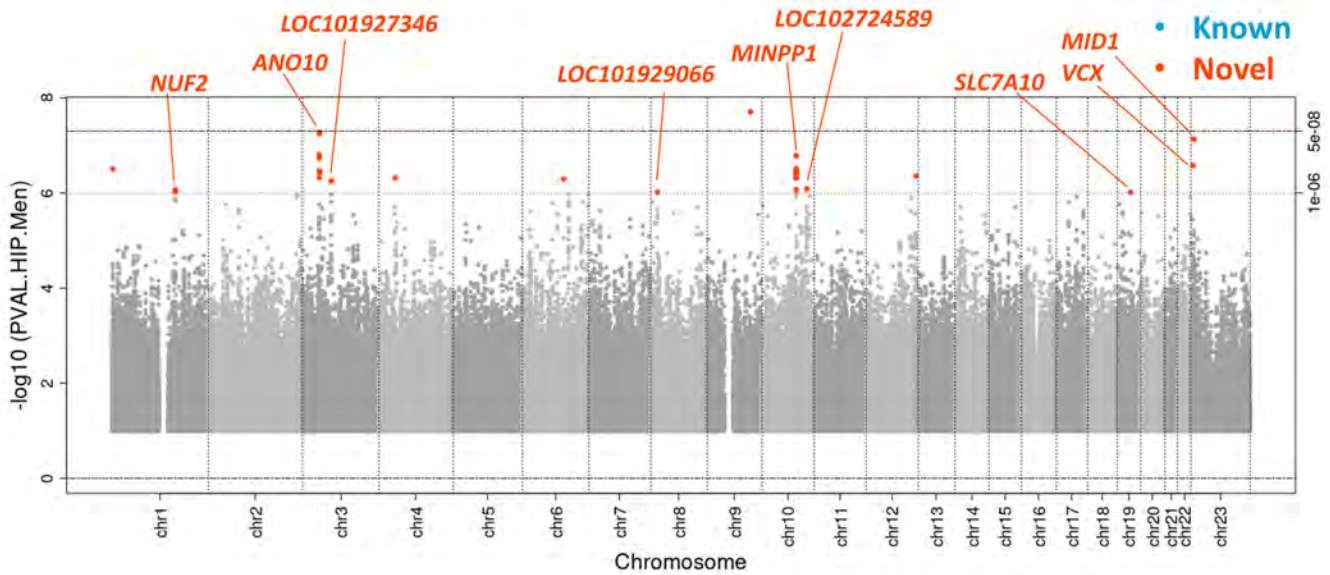



**Supplementary Figure 20. Locus Zoom Plots.** Regional association plots for suggestively significant loci in the HCHS/SOL HIPadjBMI men-only analysis. The plots appear in chromosome:position order. Dot color reflects  $R^2$  calculated from the 1000 Genomes AMR reference dataset. Point symbols represent variant functional classifications: a) rs114865909, *NUF2*; b) rs149681500, *ANO10*; c) rs3915213, *LOC101927346*; d) rs12677587, *LOC101929066*; e) rs56405004, *MINPP1*; f) rs968849, *LOC102724589*; g) rs76469489, *SLC7A10*; h) rs7063750, *VCX*; i) rs112519383, *MID1*.

# a) HIPadjBMI Men

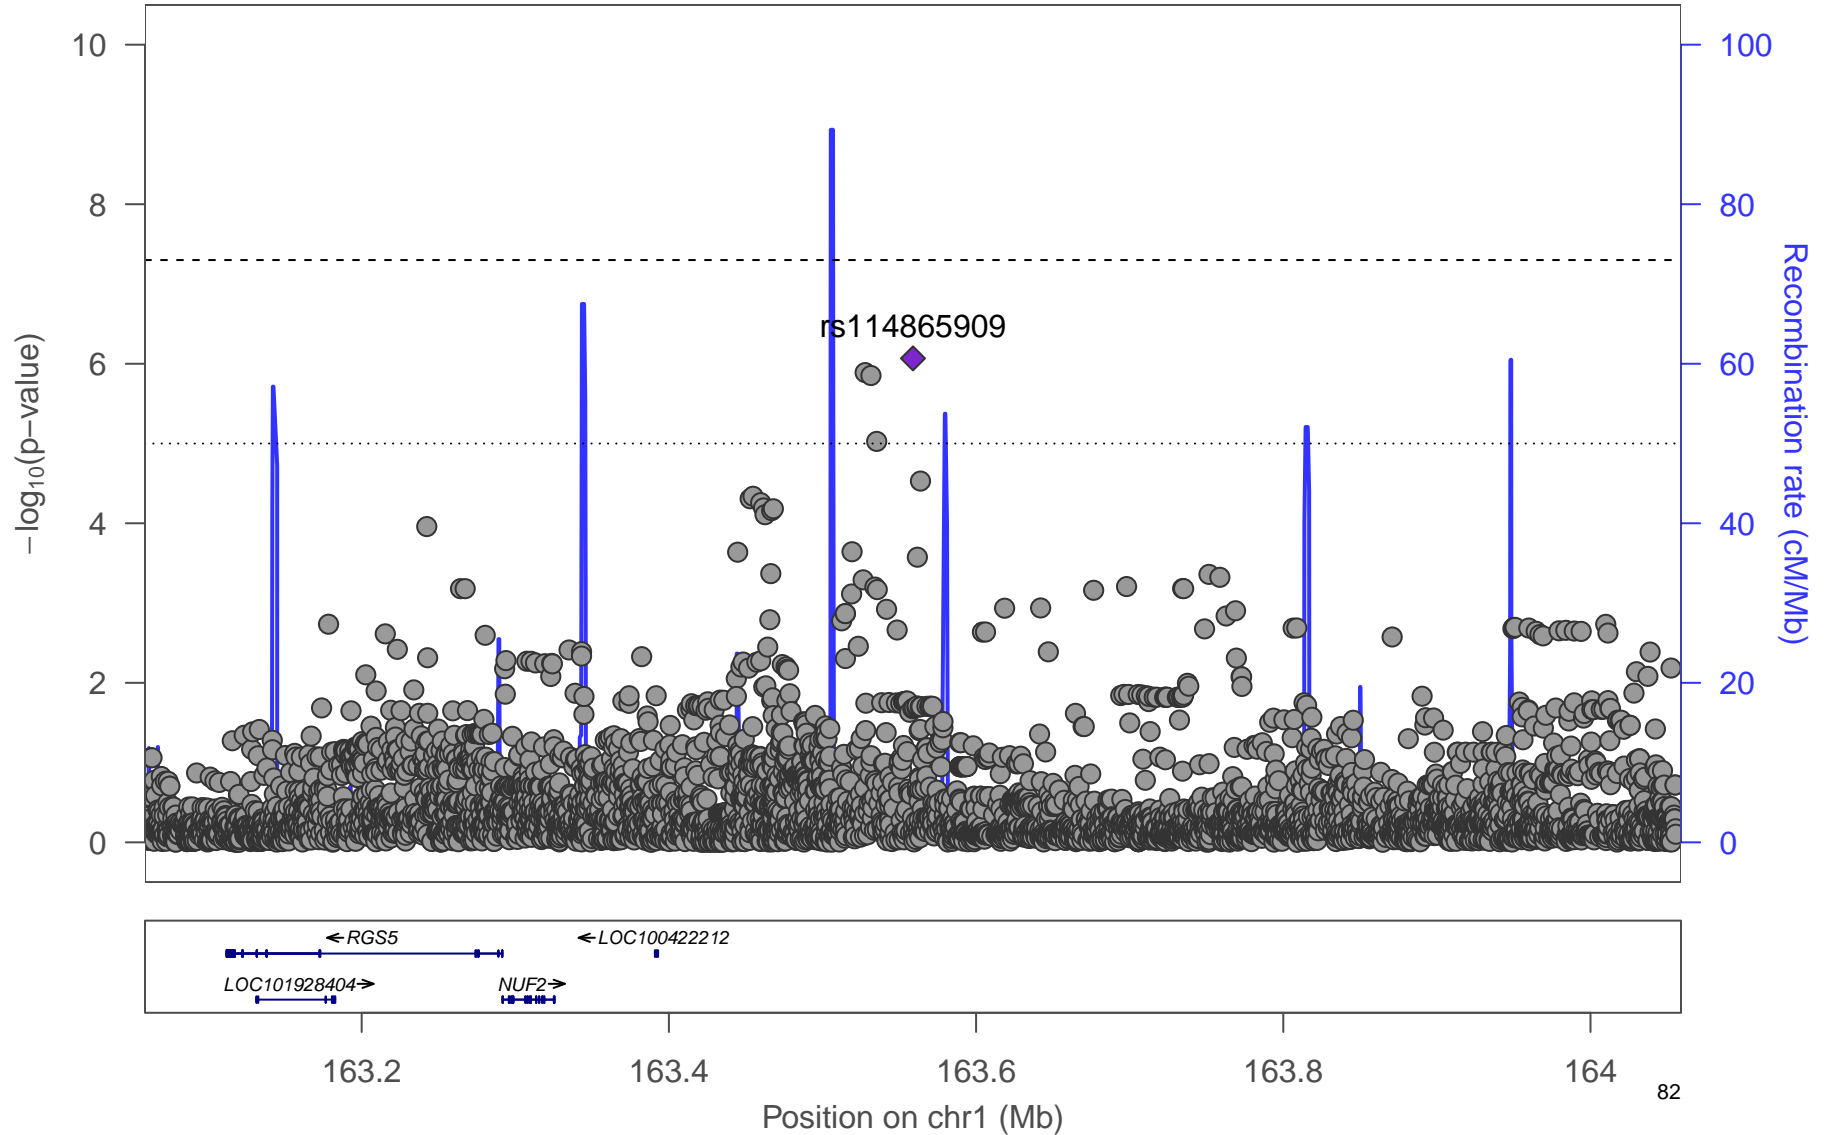

## b) HIPadjBMI Men

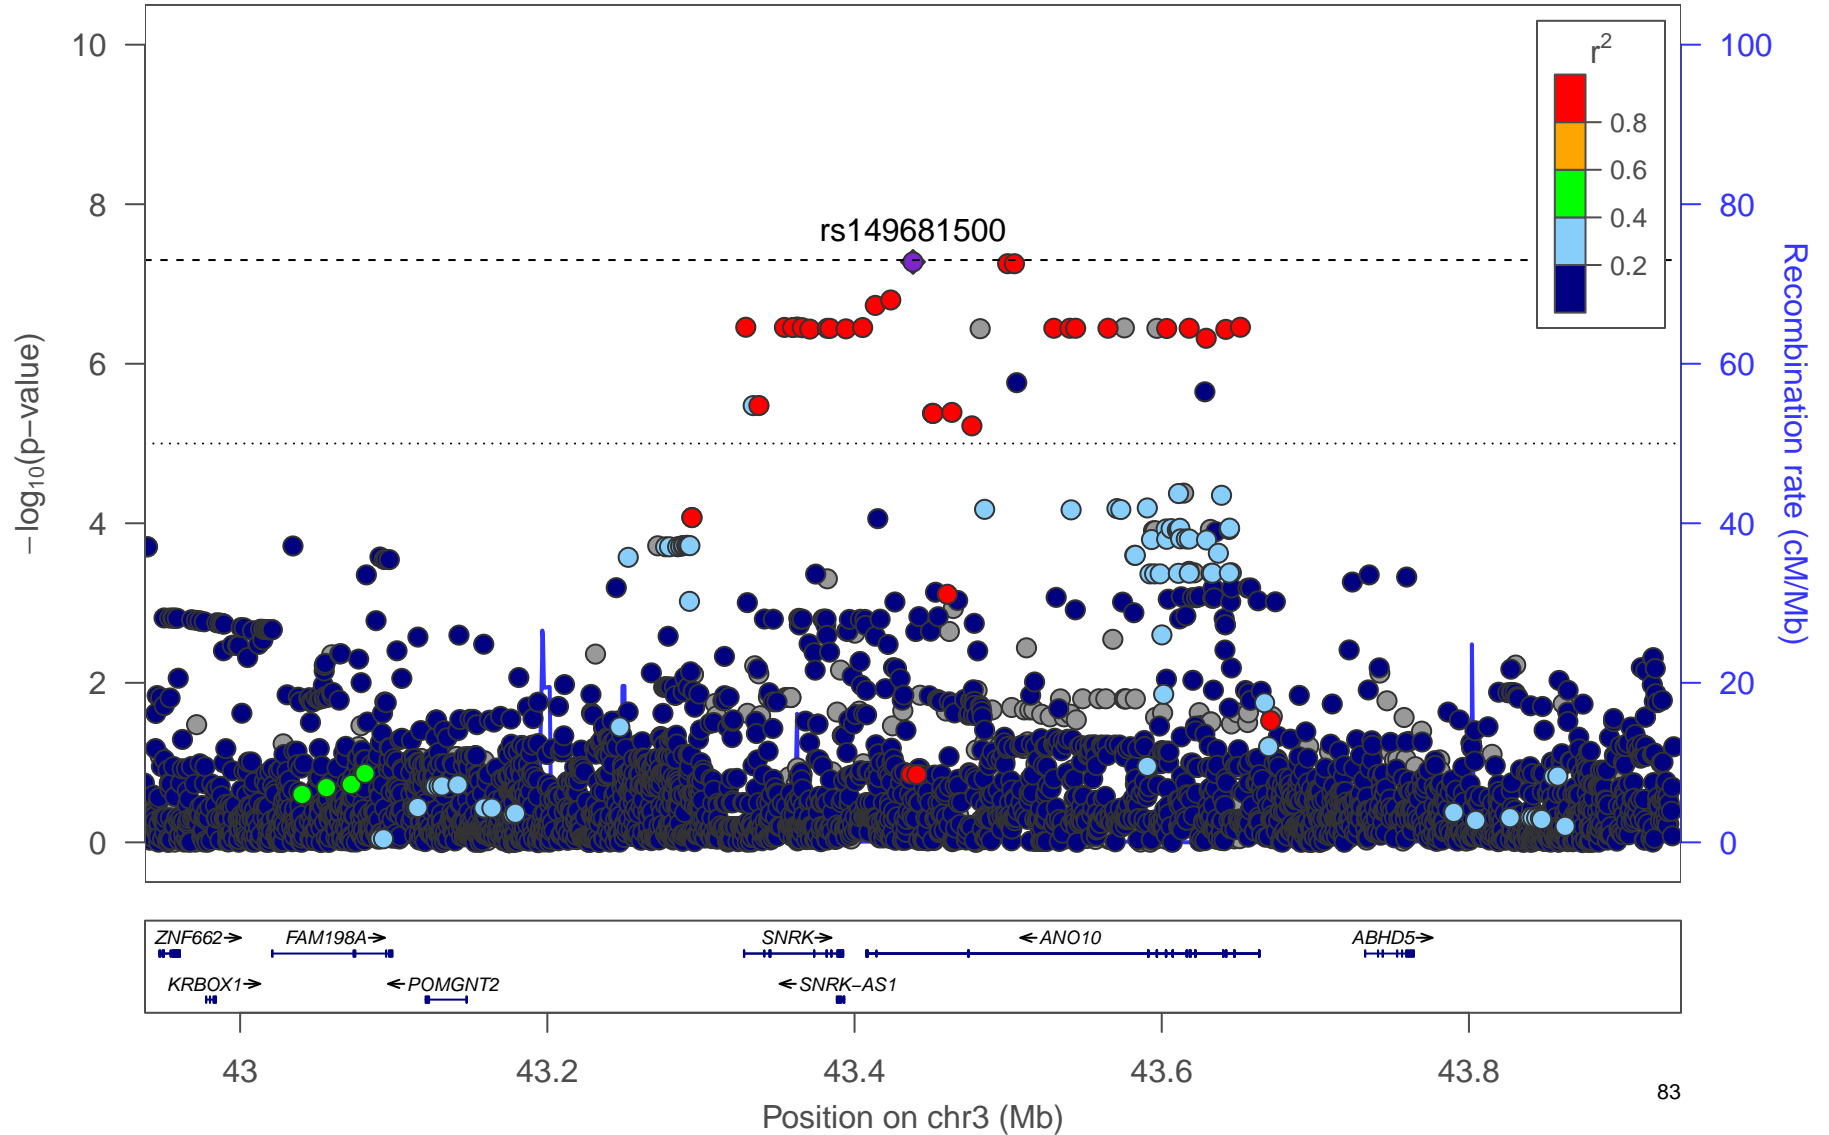

# c) HIPadjBMI Men

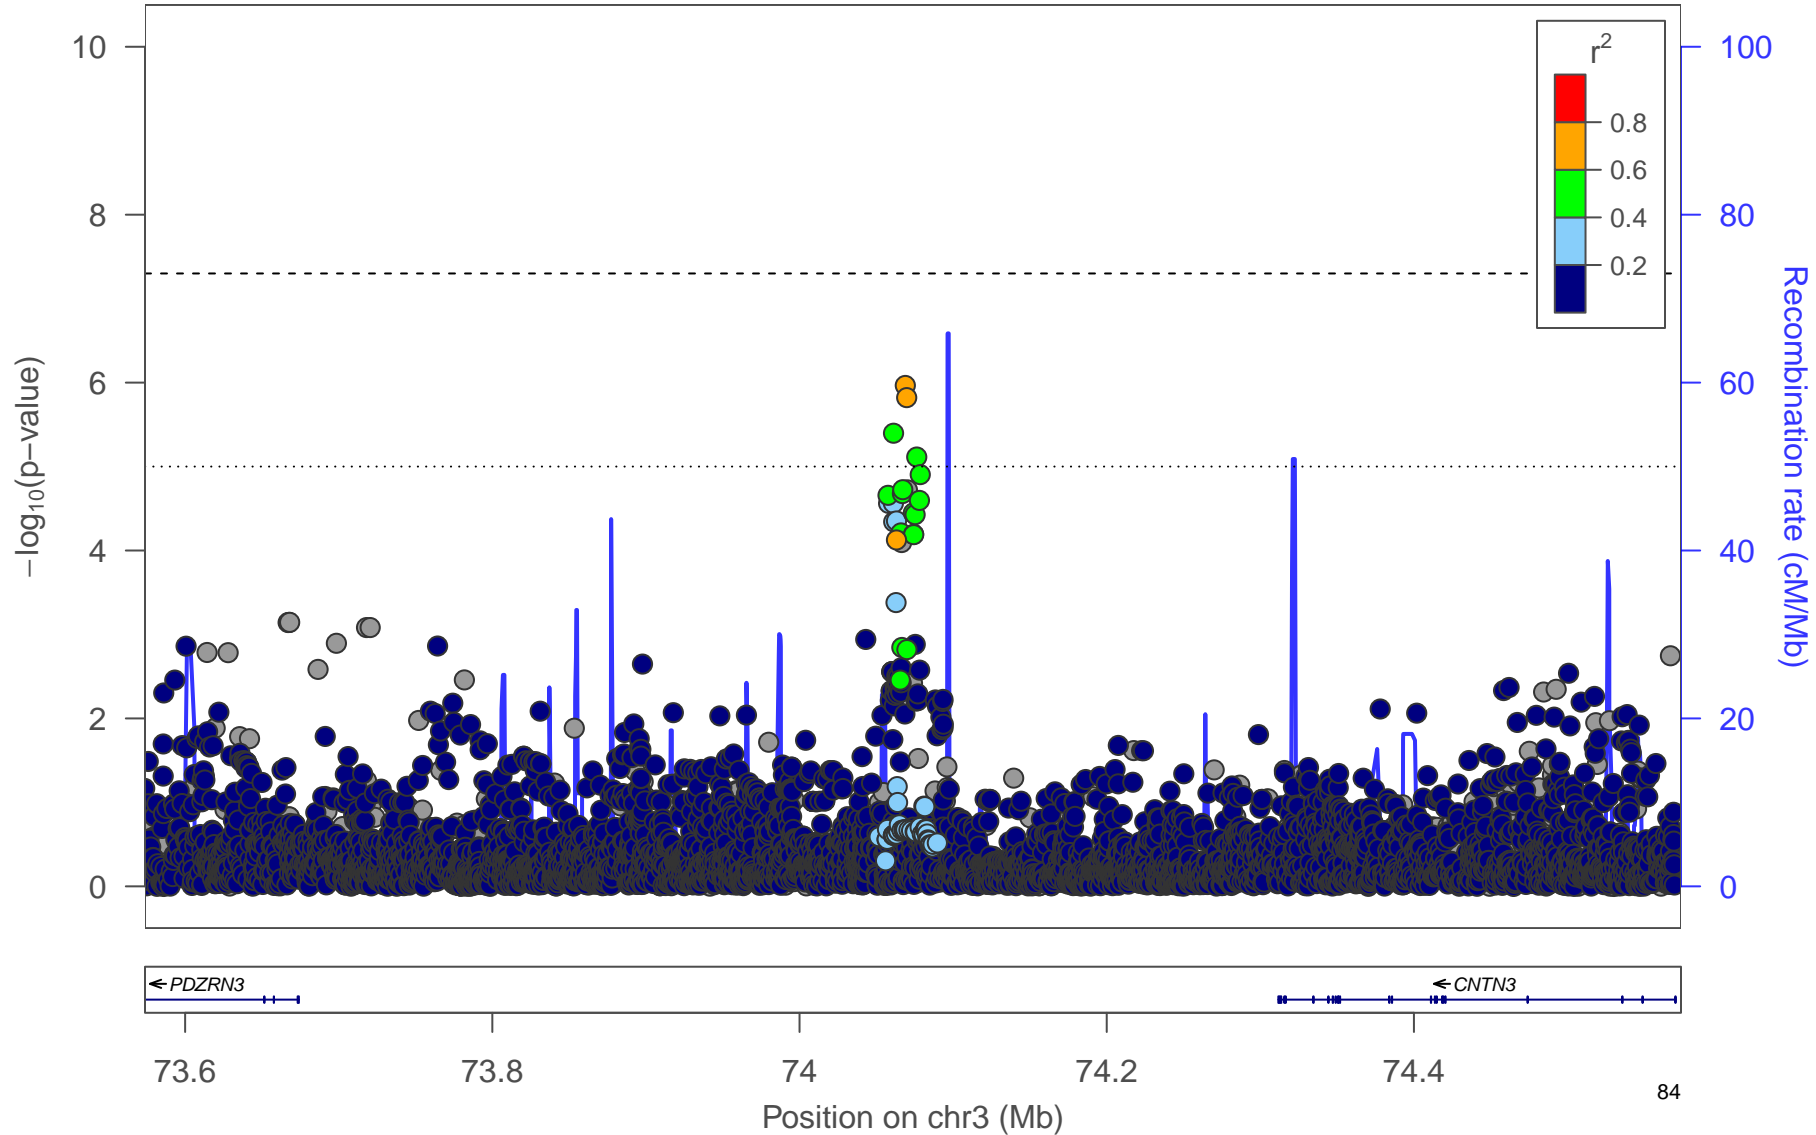

# d) HIPadjBMI Men

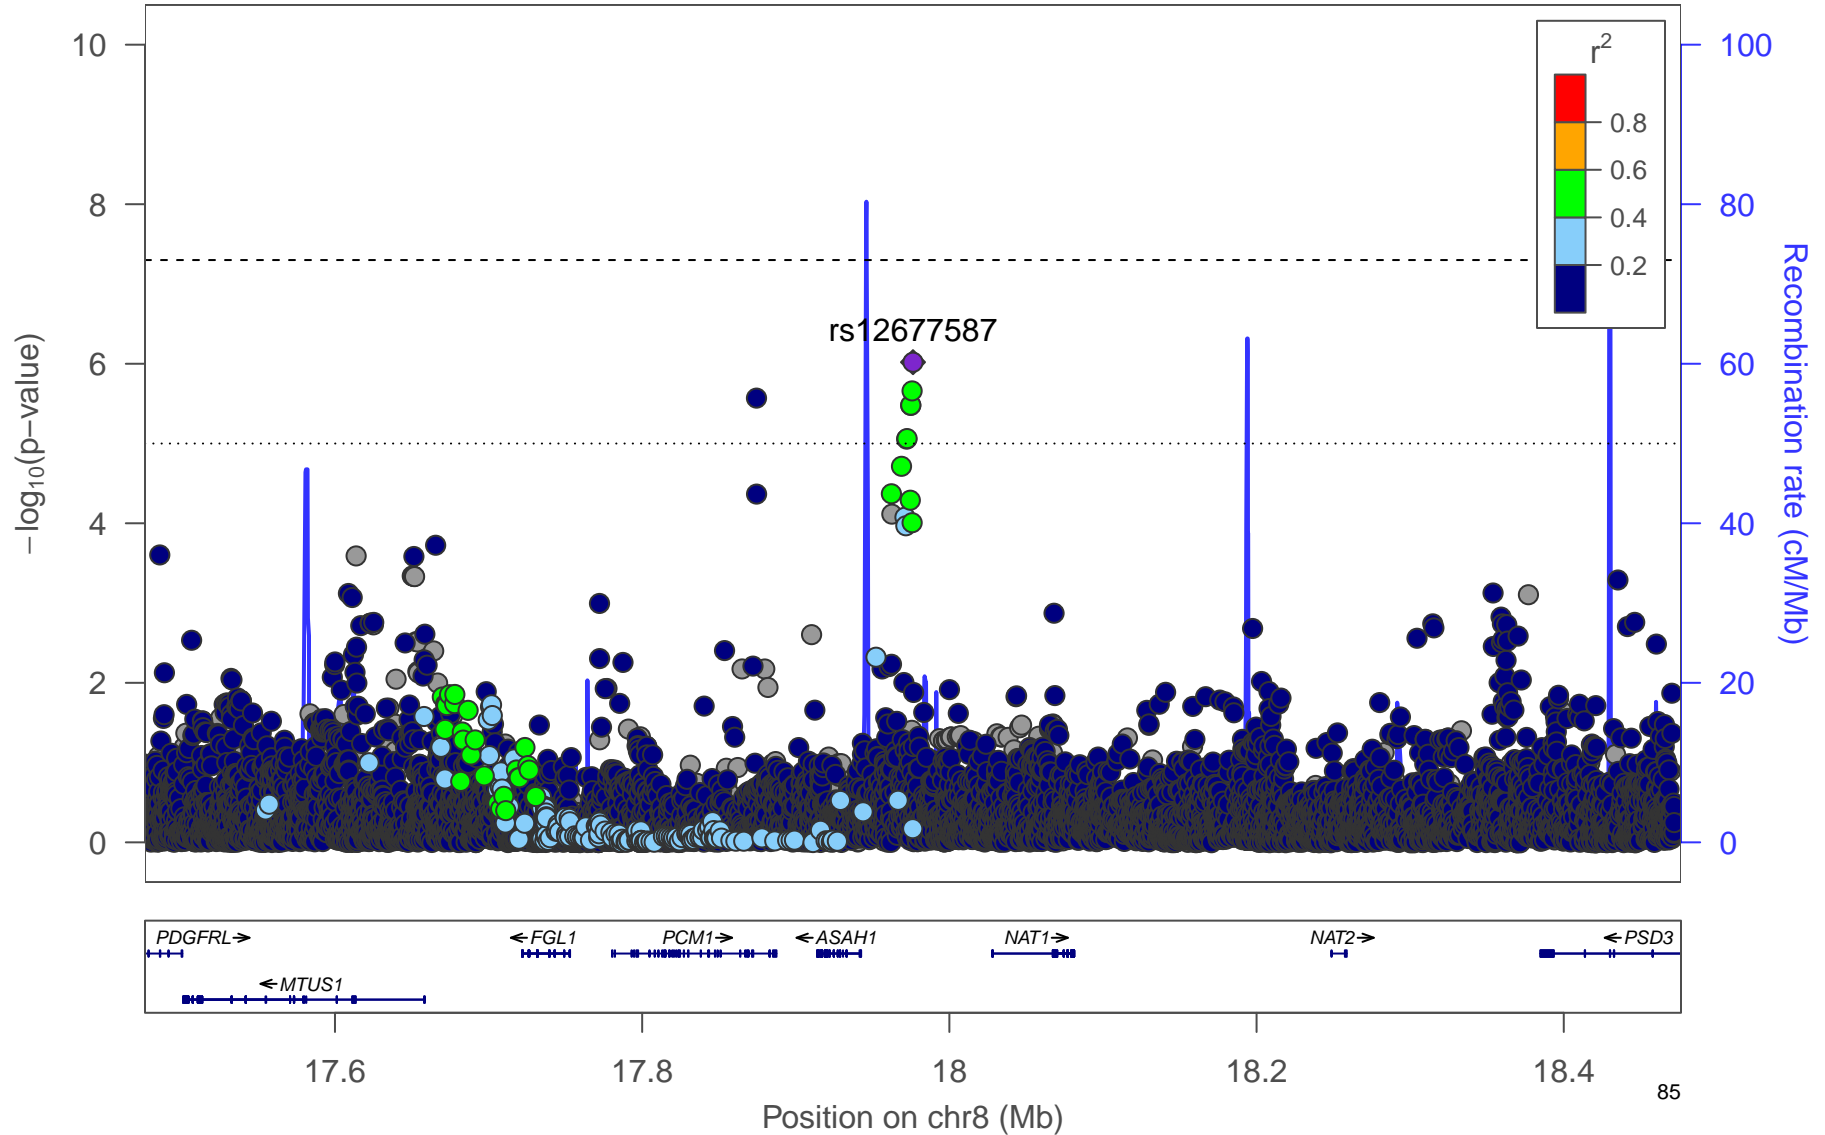

# e) HIPadjBMI Men

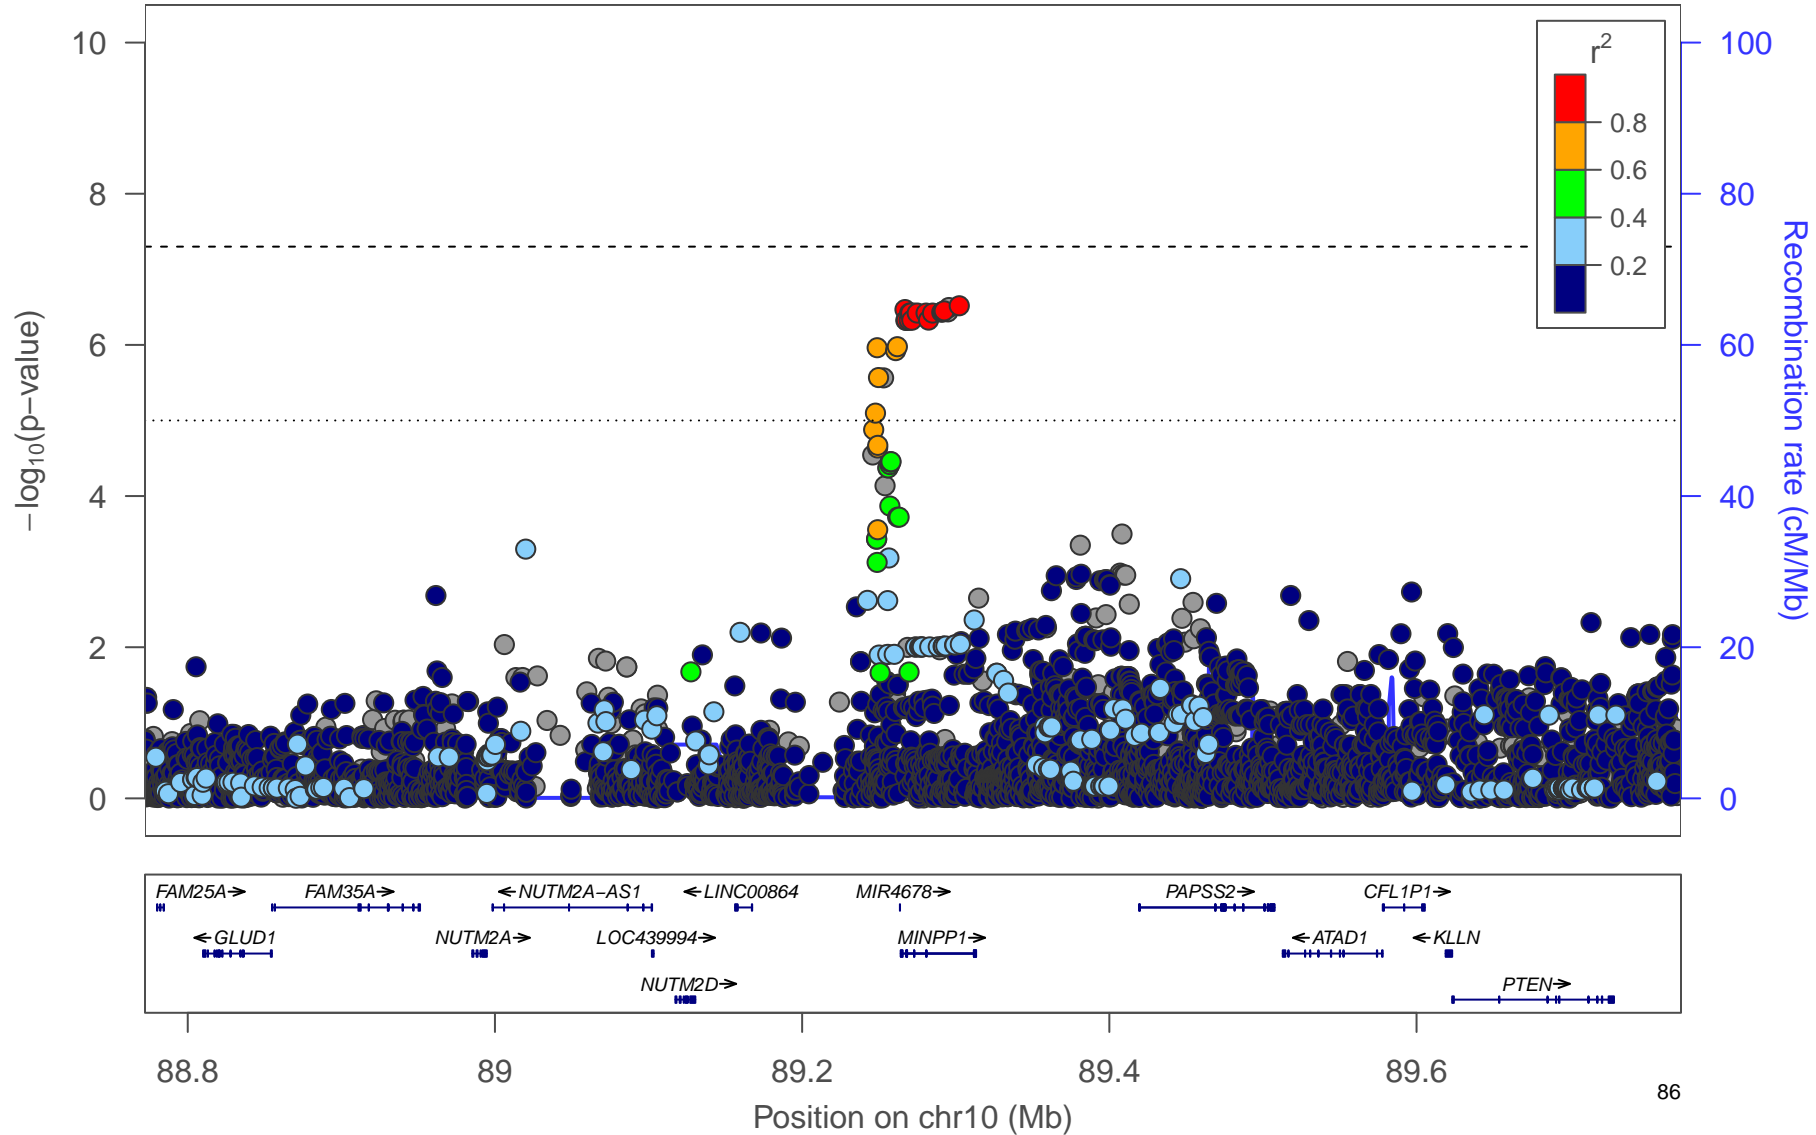

# f) HIPadjBMI Men

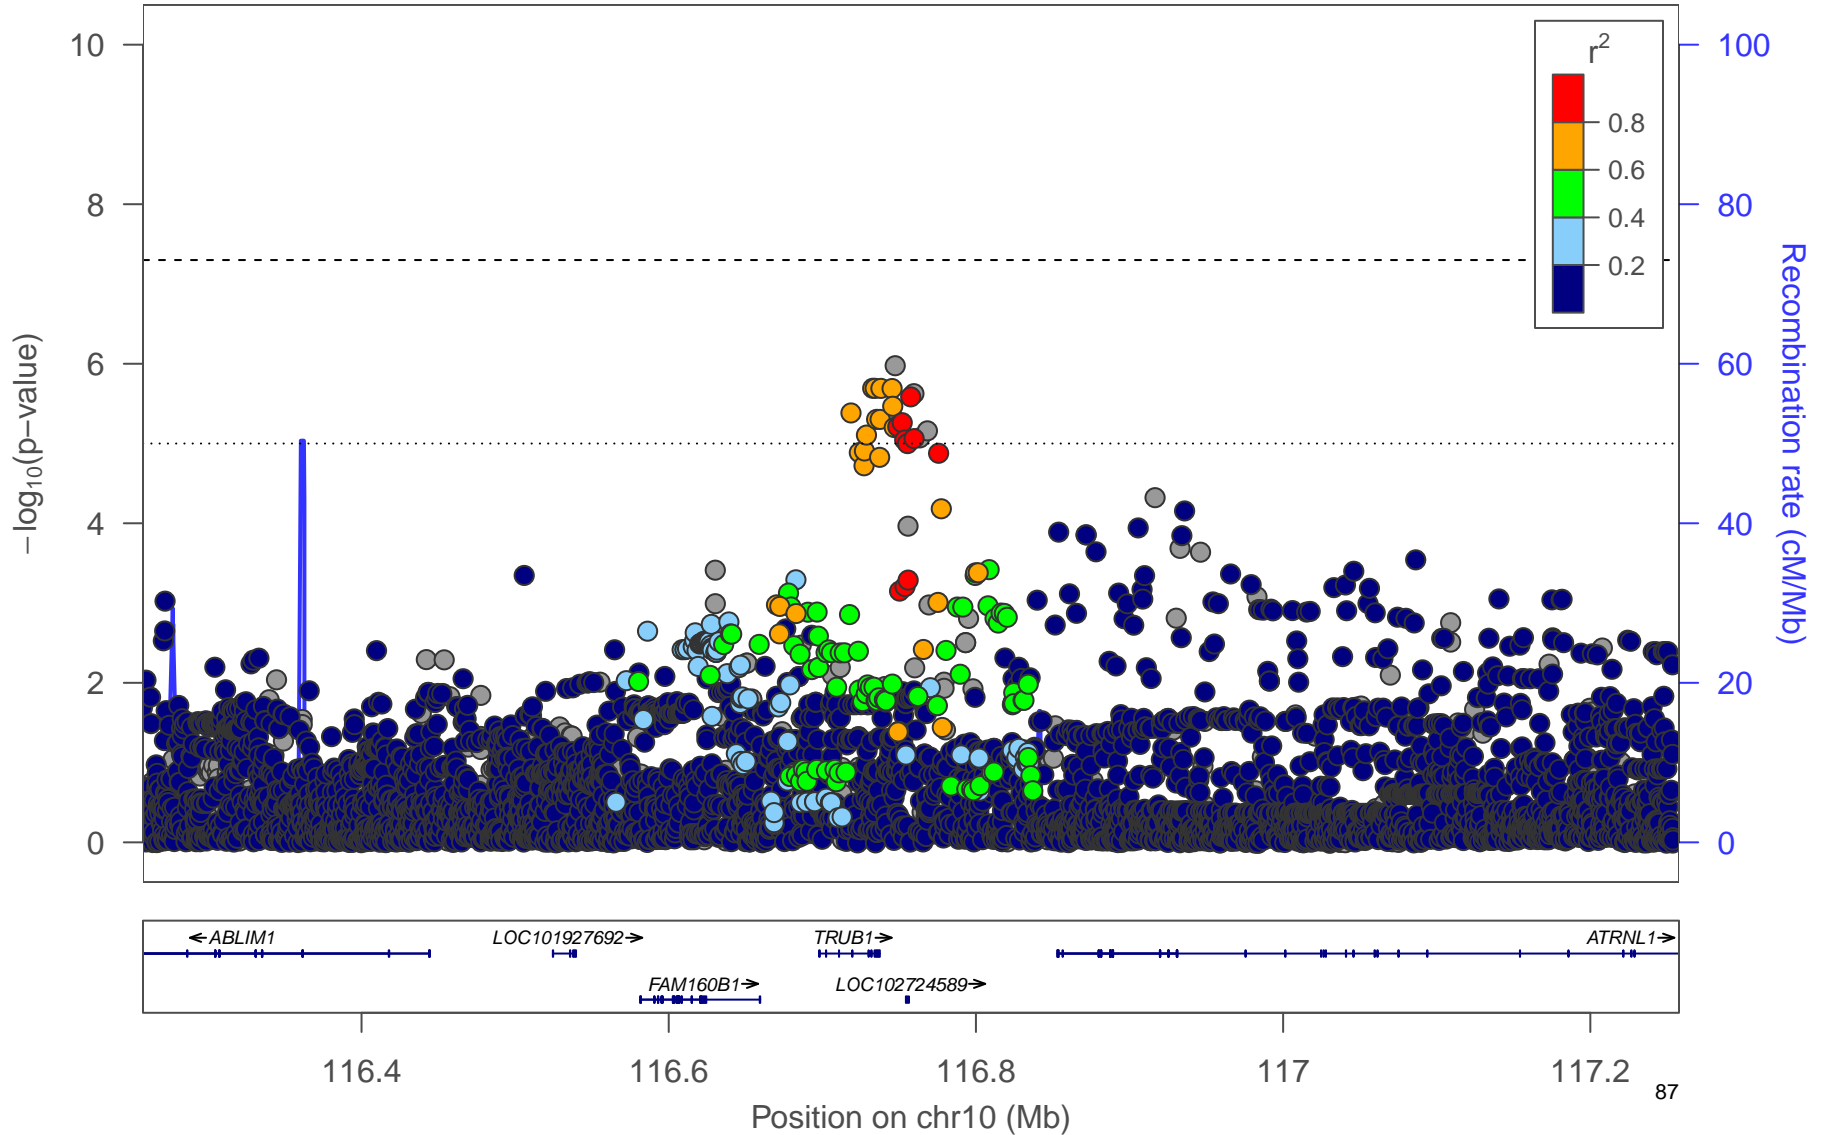

# g) HIPadjBMI Men

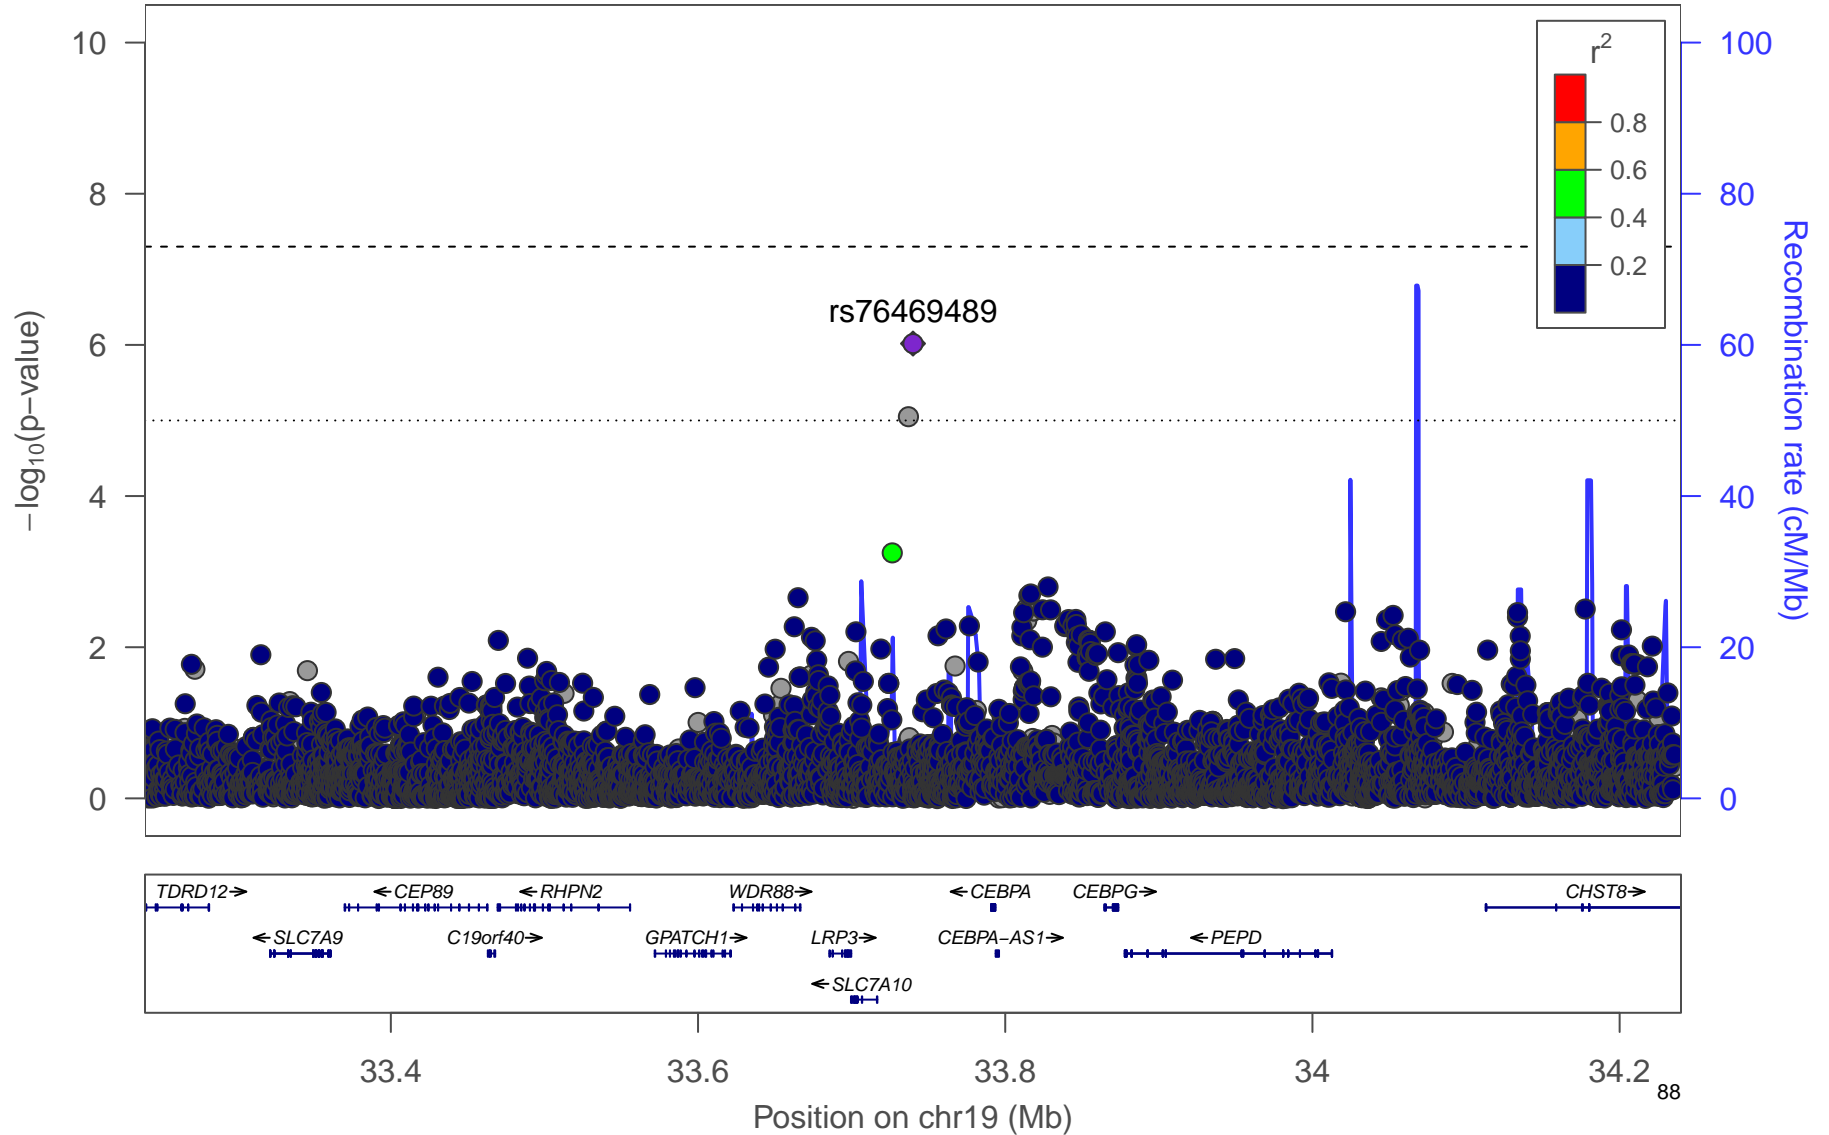



# h) HIPadjBMI Men

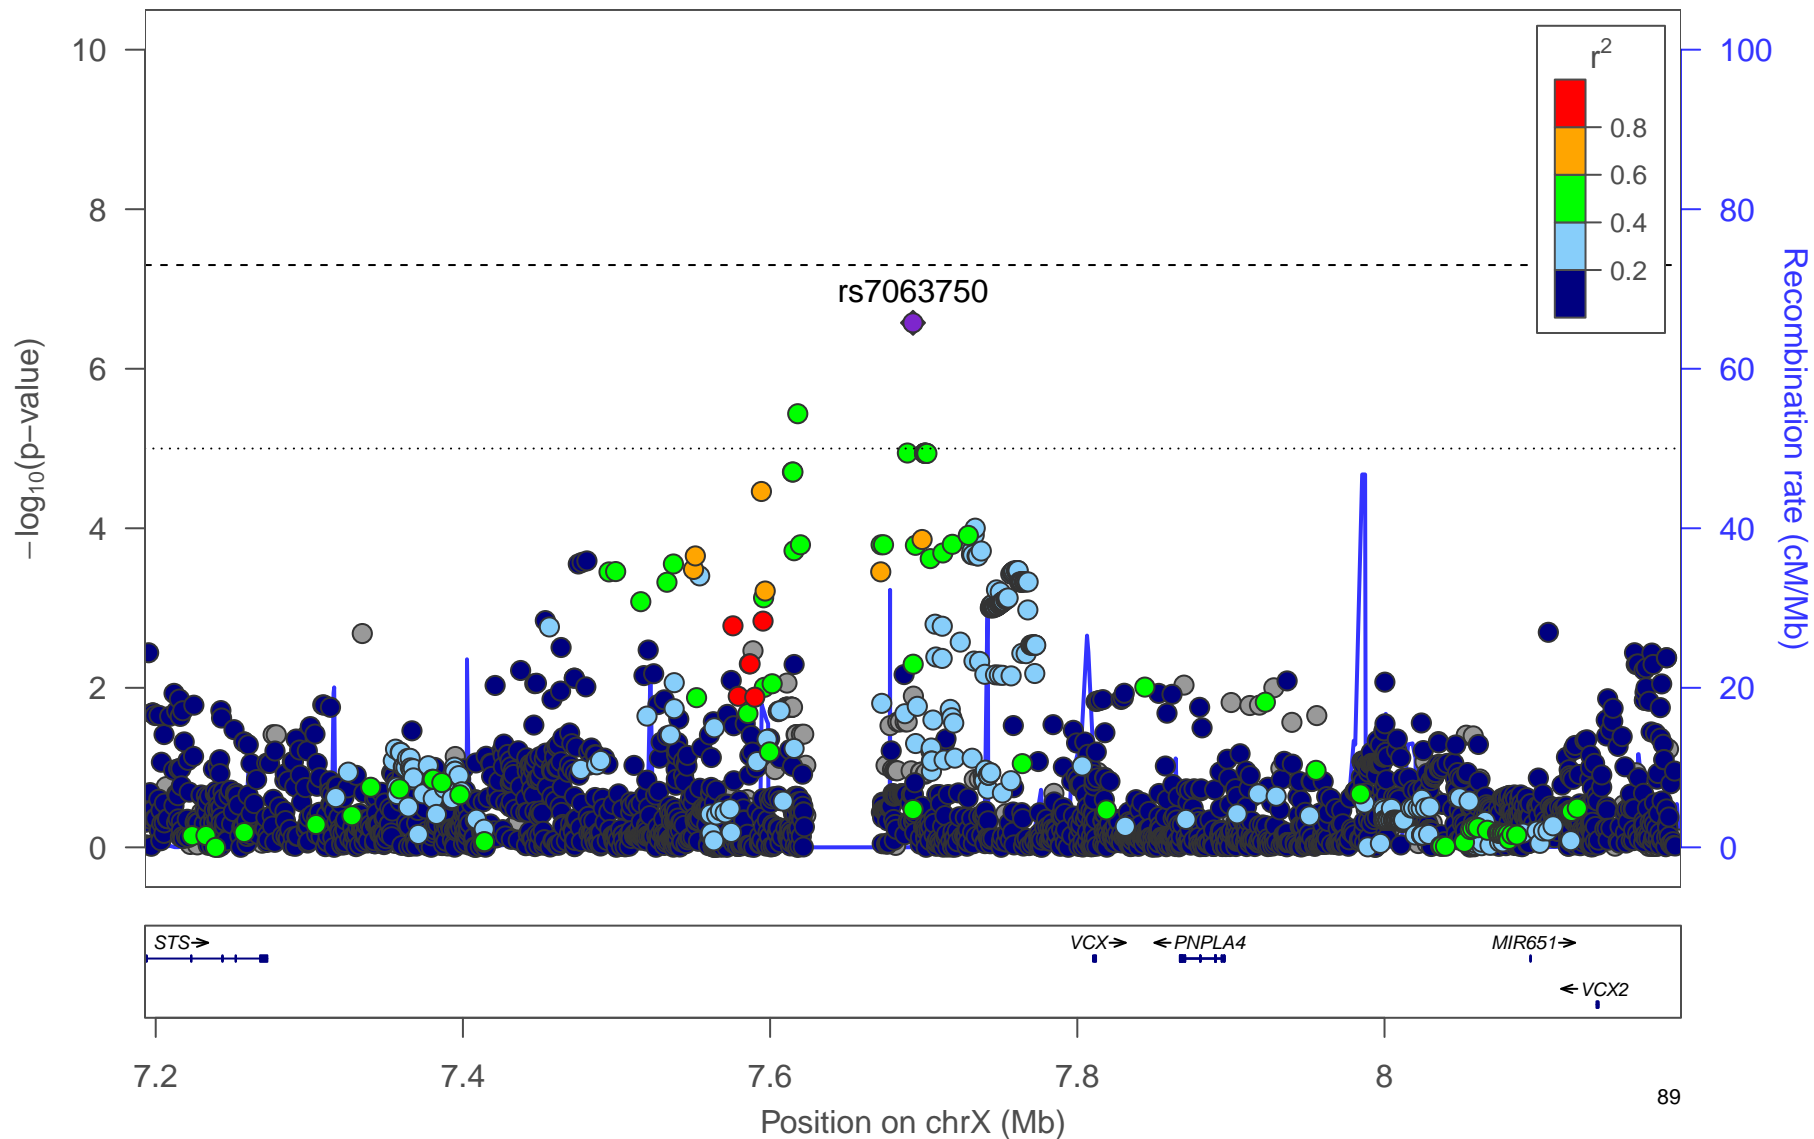

# i) HIPadjBMI Men

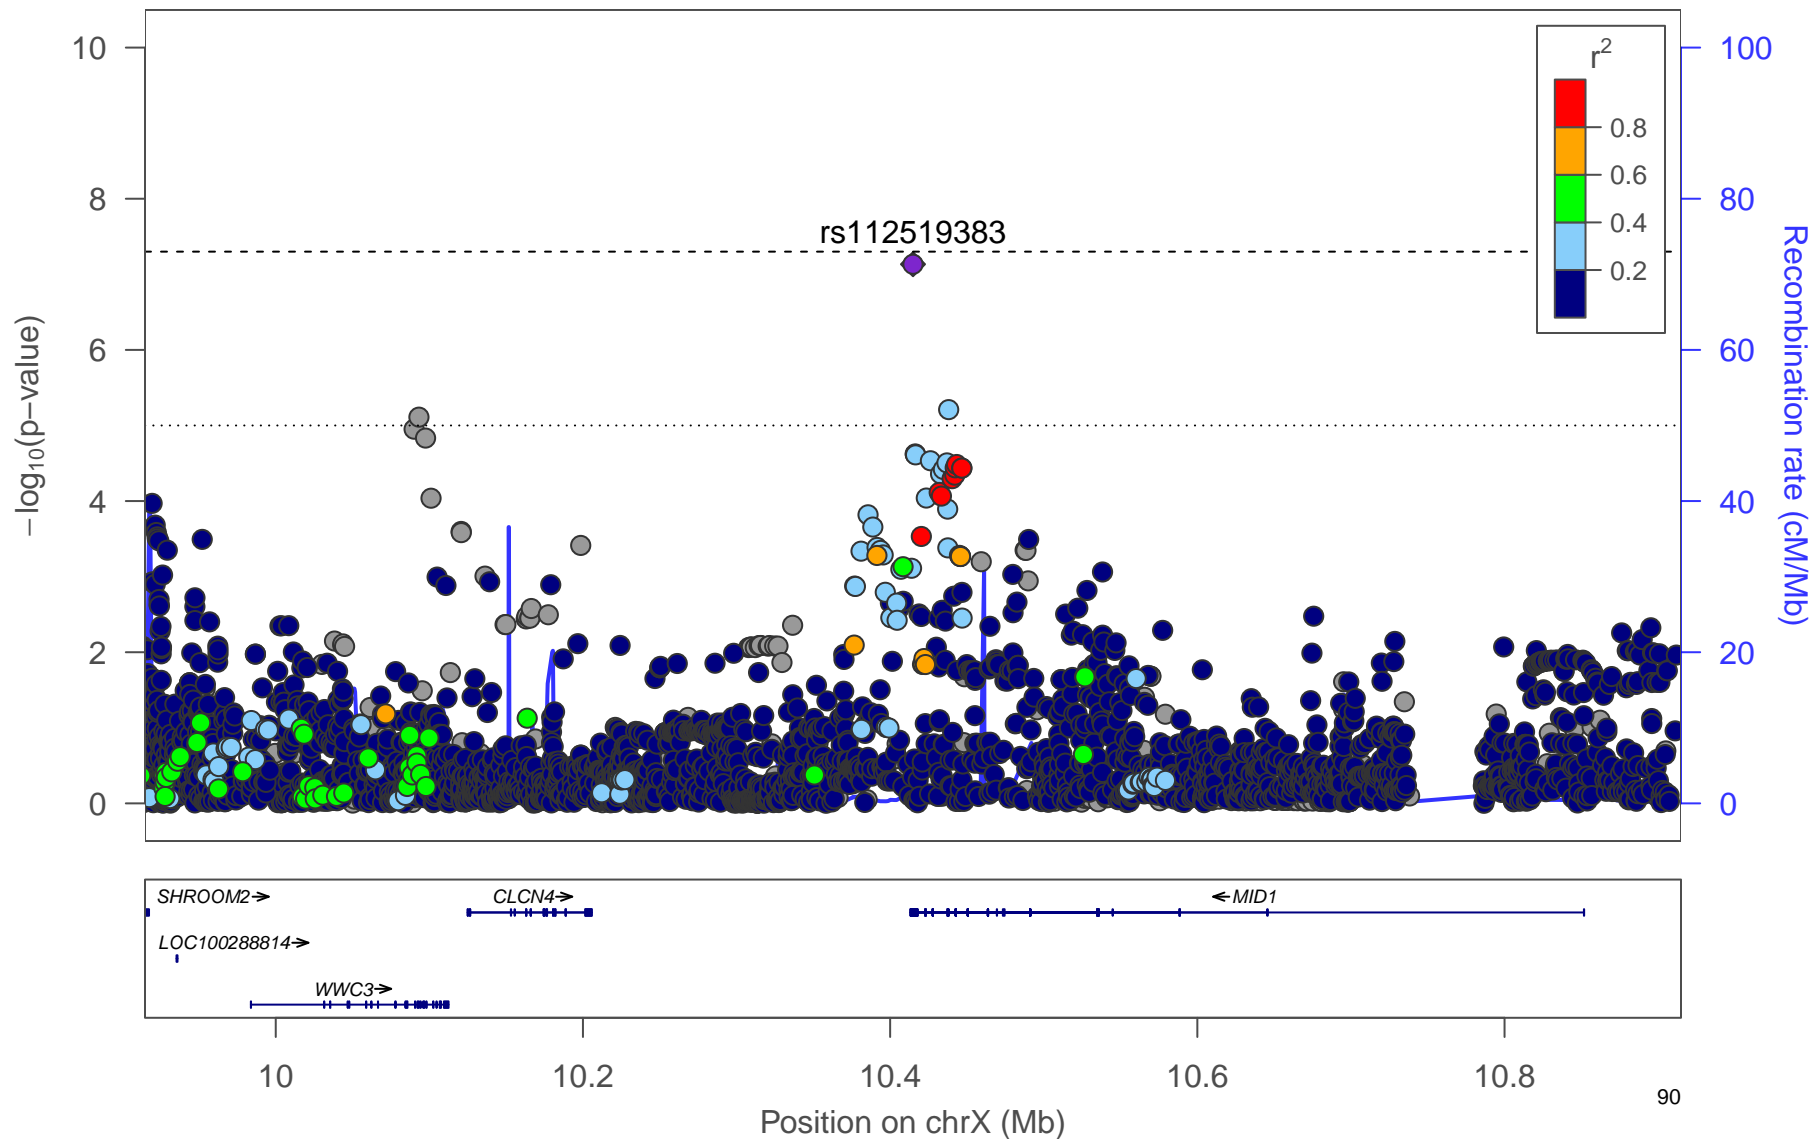

**Supplementary Figure 21. QQ Plots.** QQ Plots for HIPadjBMI, including sexes-combined (black), women-only (orange), men-only (blue).

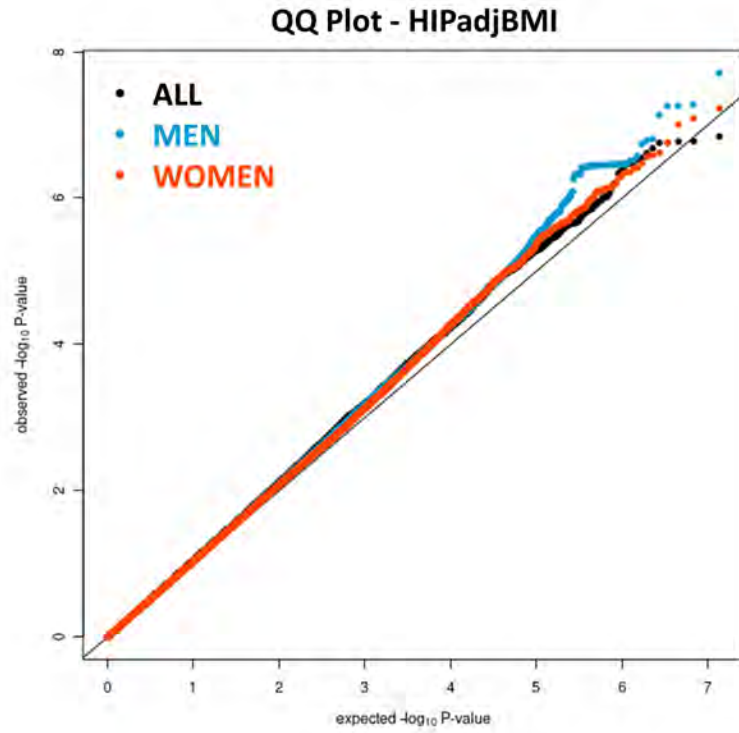

**Supplementary Figure 22. Generalization of Known WHRadjBMI Loci.** Comparison of the effect size estimates of known loci associated with WHRadjBMI in the sexes-combined analysis for GIANT (Shungin et al. 2015), all-ancestry GWAS, and the HCHS/SOL. Estimates are shown for all lead-gen SNPs with  $r$ -value  $< 0.1$ . Lead-gen SNPs are the SNPs with smallest  $r$ -value in a known locus. Loci were defined as regions of 1MB. Generalized SNPs ( $r$ -value  $< 0.05$ ) are highlighted in blue and non-generalized SNPs are highlighted in red.

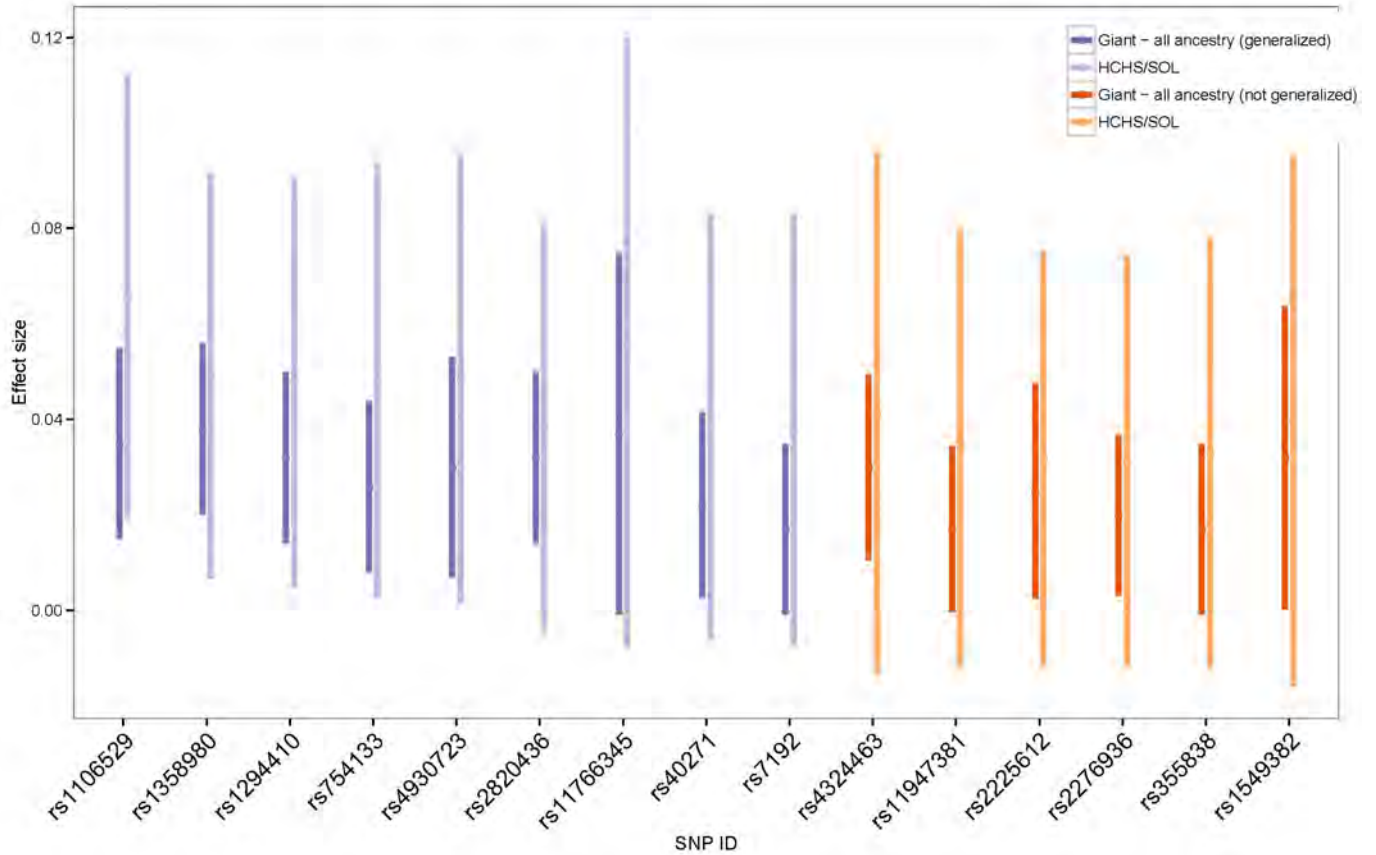

**Supplementary Figure 23. Generalization of Known WHRadjBMI Loci.** Comparison of the effect size estimates of known loci associated with WHRadjBMI in the women-only analysis for GIANT (Shungin et al. 2015), all-ancestry GWAS, and the HCHS/SOL women-only analysis. Estimates are shown for all lead-gen SNPs with  $r$ -value  $< 0.1$ . Lead-gen SNPs are the SNPs with smallest  $r$ -value in a known locus. Loci were defined as regions of 1MB. Generalized SNPs ( $r$ -value  $< 0.05$ ) are highlighted in blue and non-generalized SNPs are highlighted in red.

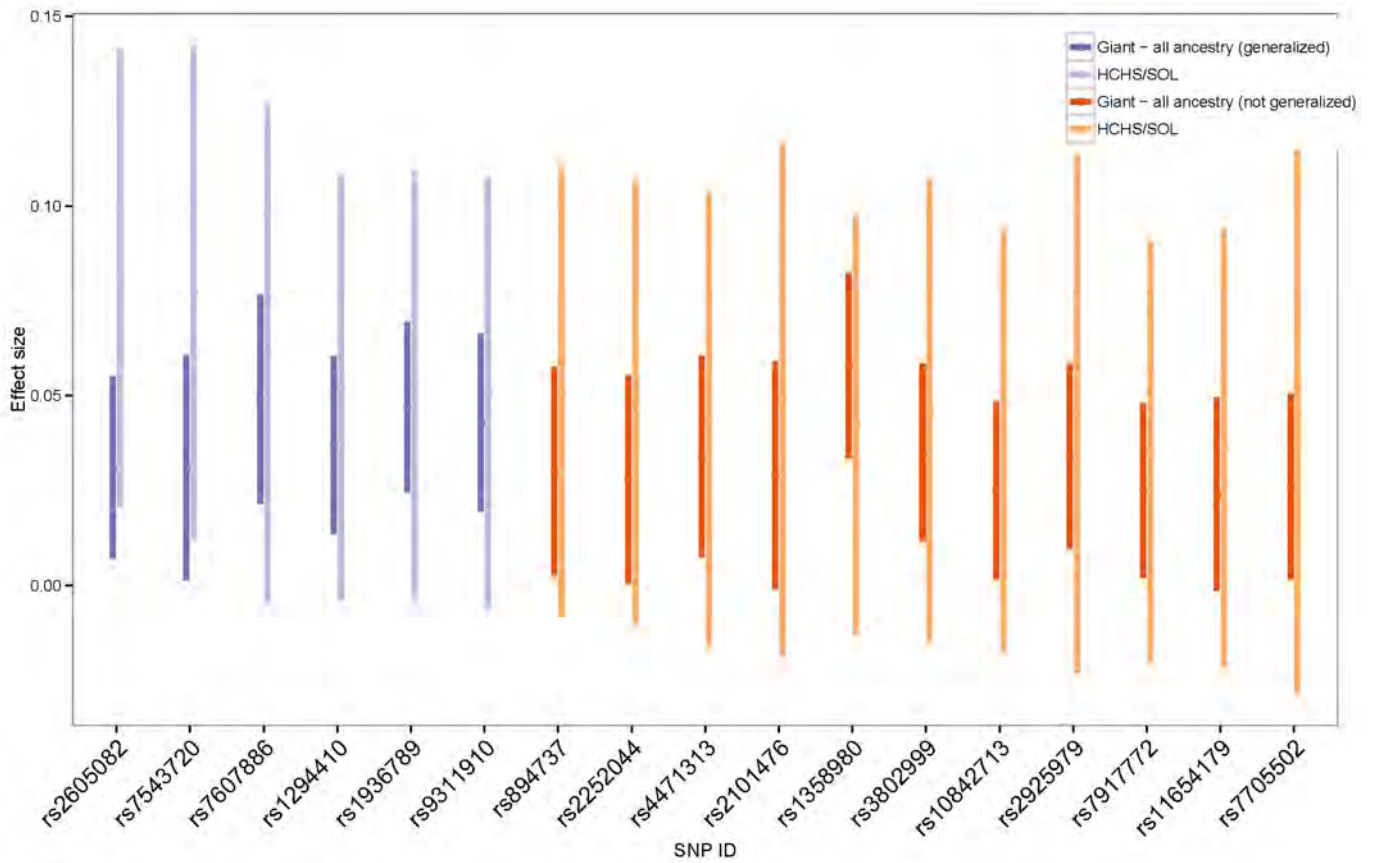

**Supplementary Figure 24. Generalization of Known WHRadjBMI Loci.** Comparison of the effect size estimates of known loci associated with WHRadjBMI in the men-only analysis for GIANT (Shungin et al. 2015), all-ancestry GWAS, and the HCHS/SOL men-only analysis. Estimates are shown for all lead-gen SNPs with  $r$ -value  $< 0.1$ . Lead-gen SNPs are the SNPs with smallest  $r$ -value in a known locus. Loci were defined as regions of 1MB. Generalized SNPs ( $r$ -value  $< 0.05$ ) are highlighted in blue and non-generalized SNPs are highlighted in red.

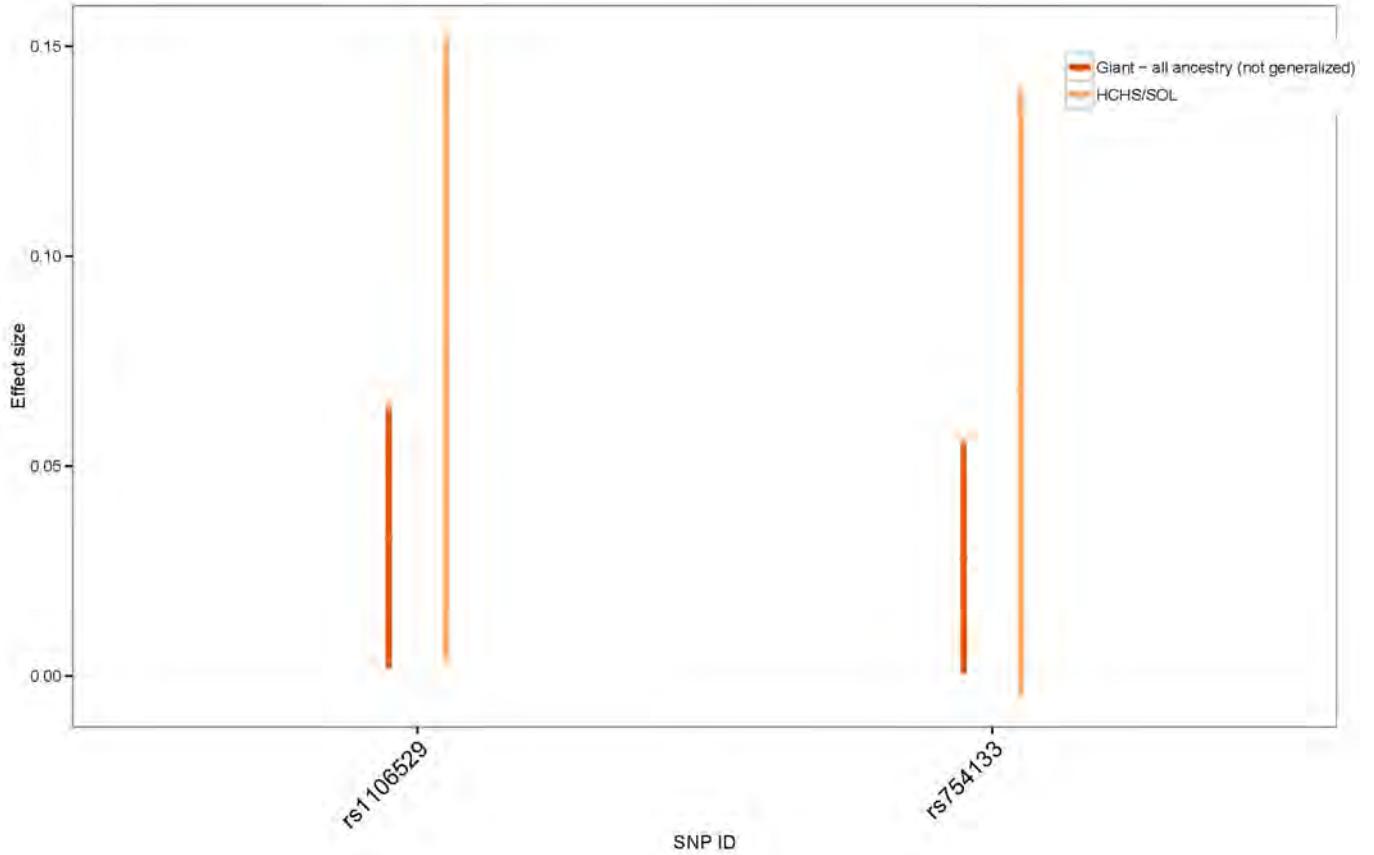

**Supplementary Figure 25. Generalization of Known WCadjBMI Loci.** Comparison of the effect size estimates of known loci associated with WCadjBMI in the sexes-combined analysis for GIANT (Shungin et al. 2015), all-ancestry GWAS, and the HCHS/SOL sexes-combined analysis. Estimates are shown for all lead-gen SNPs with  $r$ -value  $< 0.1$ . Lead-gen SNPs are the SNPs with smallest  $r$ -value in a known locus. Loci were defined as regions of 1MB. Generalized SNPs ( $r$ -value  $< 0.05$ ) are highlighted in blue and non-generalized SNPs are highlighted in red.

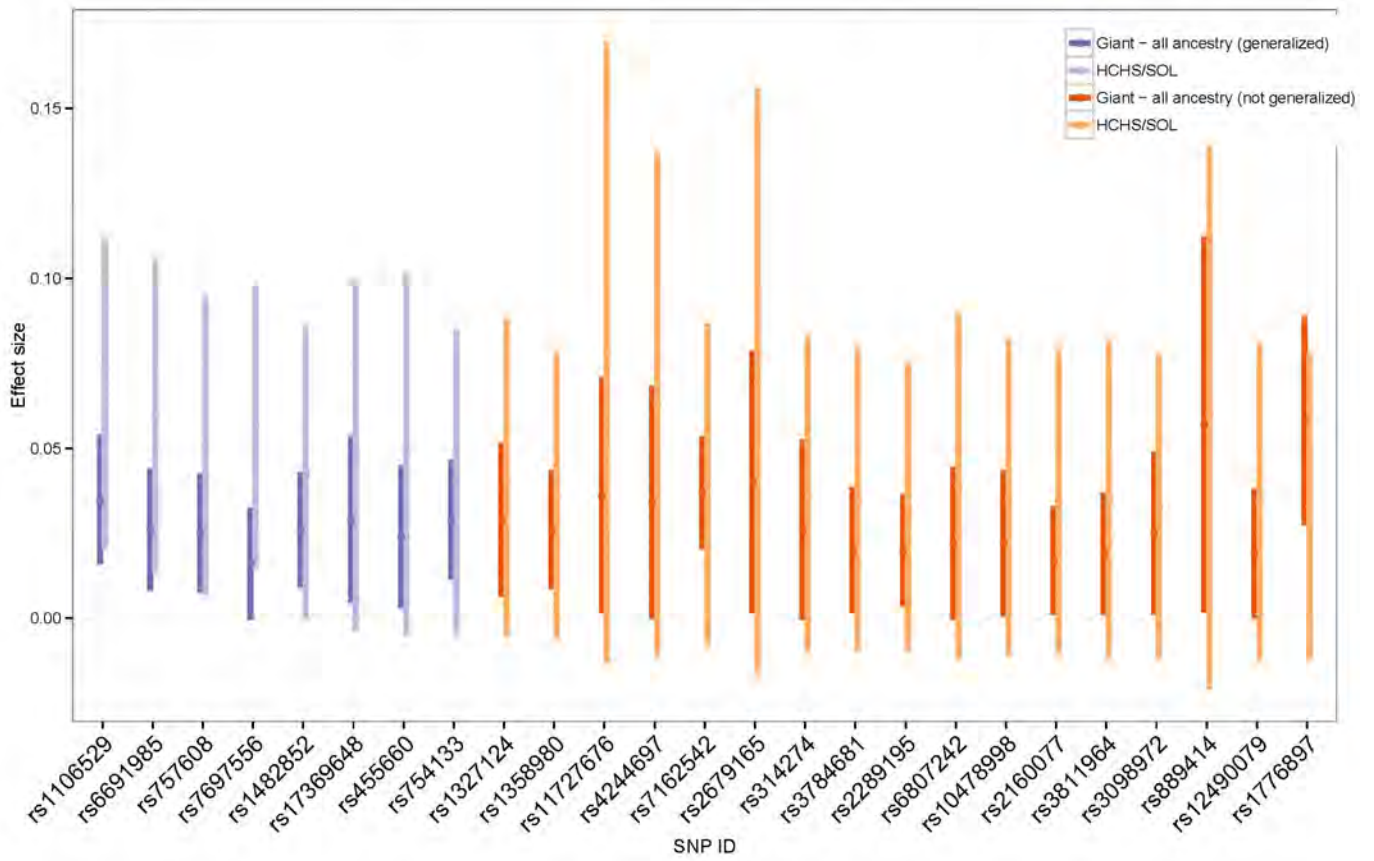

**Supplementary Figure 26. Generalization of Known WCadjBMI Loci.** Comparison of the effect size estimates of known loci associated with WCadjBMI in the women-only analysis for GIANT (Shungin et al. 2015), all-ancestry GWAS, and the HCHS/SOL women-only analysis. Estimates are shown for all lead-gen SNPs with  $r$ -value  $< 0.1$ . Lead-gen SNPs are the SNPs with smallest  $r$ -value in a known locus. Loci were defined as regions of 1MB. Generalized SNPs ( $r$ -value  $< 0.05$ ) are highlighted in blue and non-generalized SNPs are highlighted in red.

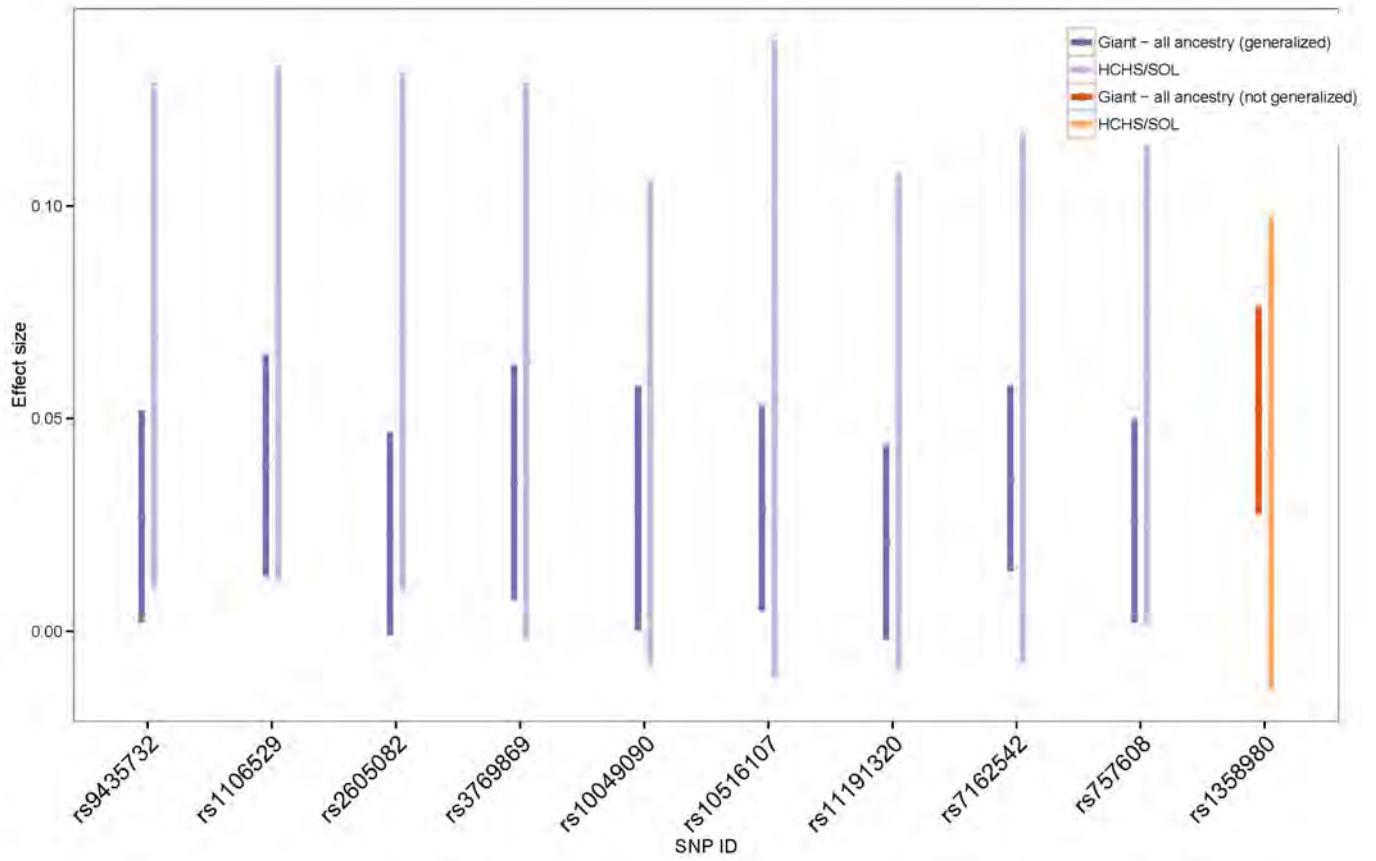



**Supplementary Figure 27. Generalization of Known WCadjBMI Loci.** Comparison of the effect size estimates of known loci associated with WCadjBMI in the men-only analysis for GIANT (Shungin et al. 2015), all-ancestry GWAS, and the HCHS/SOL men-only analysis. Estimates are shown for all lead-gen SNPs with  $r$ -value  $< 0.1$ . Lead-gen SNPs are the SNPs with smallest  $r$ -value in a known locus. Loci were defined as regions of 1MB. Generalized SNPs ( $r$ -value  $< 0.05$ ) are highlighted in blue and non-generalized SNPs are highlighted in red.

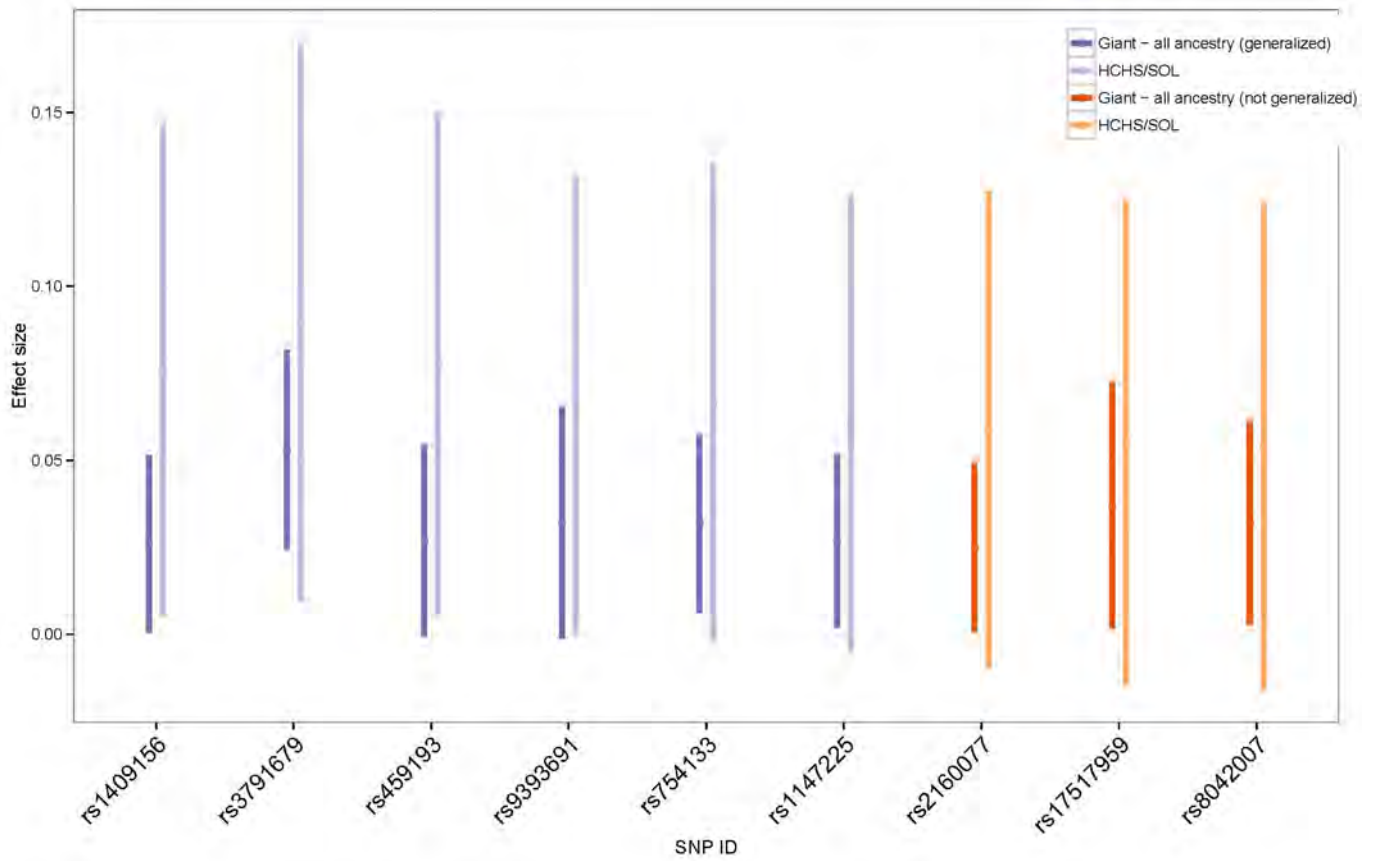

**Supplementary Figure 28. Generalization of Known HIPadjBMI Loci.** Comparison of the effect size estimates of known loci associated with HIPadjBMI in the sexes-combined analysis for GIANT (Shungin et al. 2015), all-ancestry GWAS, and the HCHS/SOL sexes-combined analysis. Estimates are shown for all lead-gen SNPs with  $r$ -value  $< 0.1$ . Lead-gen SNPs are the SNPs with smallest  $r$ -value in a known locus. Loci were defined as regions of 1MB. Generalized SNPs ( $r$ -value  $< 0.05$ ) are highlighted in blue and non-generalized SNPs are highlighted in red.

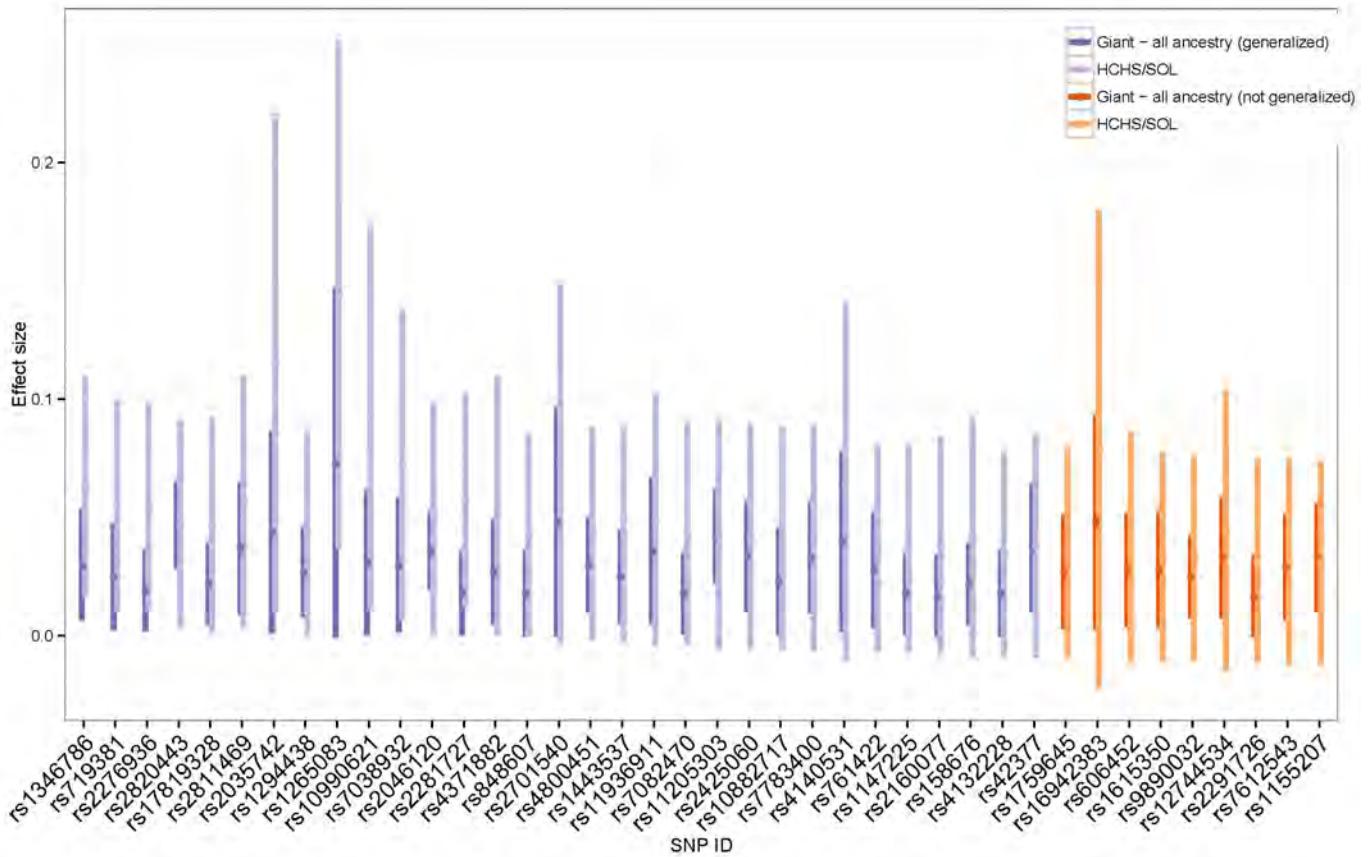

**Supplementary Figure 29. Generalization of Known HIPadjBMI Loci.** Comparison of the effect size estimates of known loci associated with HIPadjBMI in the women-only analysis for GIANT (Shungin et al. 2015), all-ancestry GWAS, and the HCHS/SOL women-only analysis. Estimates are shown for all lead-gen SNPs with  $r$ -value  $< 0.1$ . Lead-gen SNPs are the SNPs with smallest  $r$ -value in a known locus. Loci were defined as regions of 1MB. Generalized SNPs ( $r$ -value  $< 0.05$ ) are highlighted in blue and non-generalized SNPs are highlighted in red.

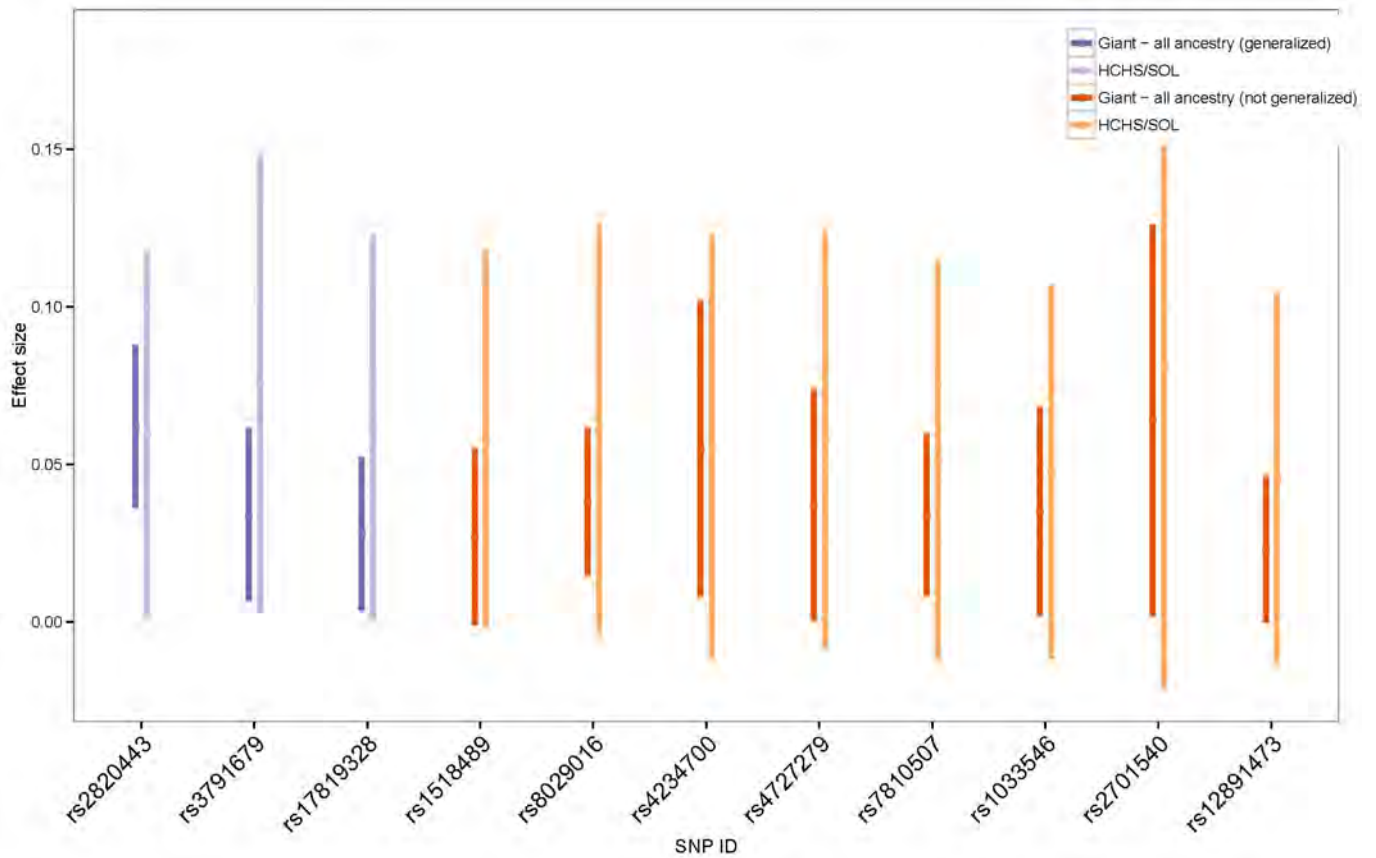

**Supplementary Figure 30. Generalization of Known HIPadjBMI Loci.** Comparison of the effect size estimates of known loci associated with HIPadjBMI in the men-only analysis for GIANT (Shungin et al. 2015), all-ancestry GWAS, and the HCHS/SOL men-only analysis. Estimates are shown for all lead-gen SNPs with  $r$ -value  $< 0.1$ . Lead-gen SNPs are the SNPs with smallest  $r$ -value in a known locus. Loci were defined as regions of 1MB. Generalized SNPs ( $r$ -value  $< 0.05$ ) are highlighted in blue and non-generalized SNPs are highlighted in red.

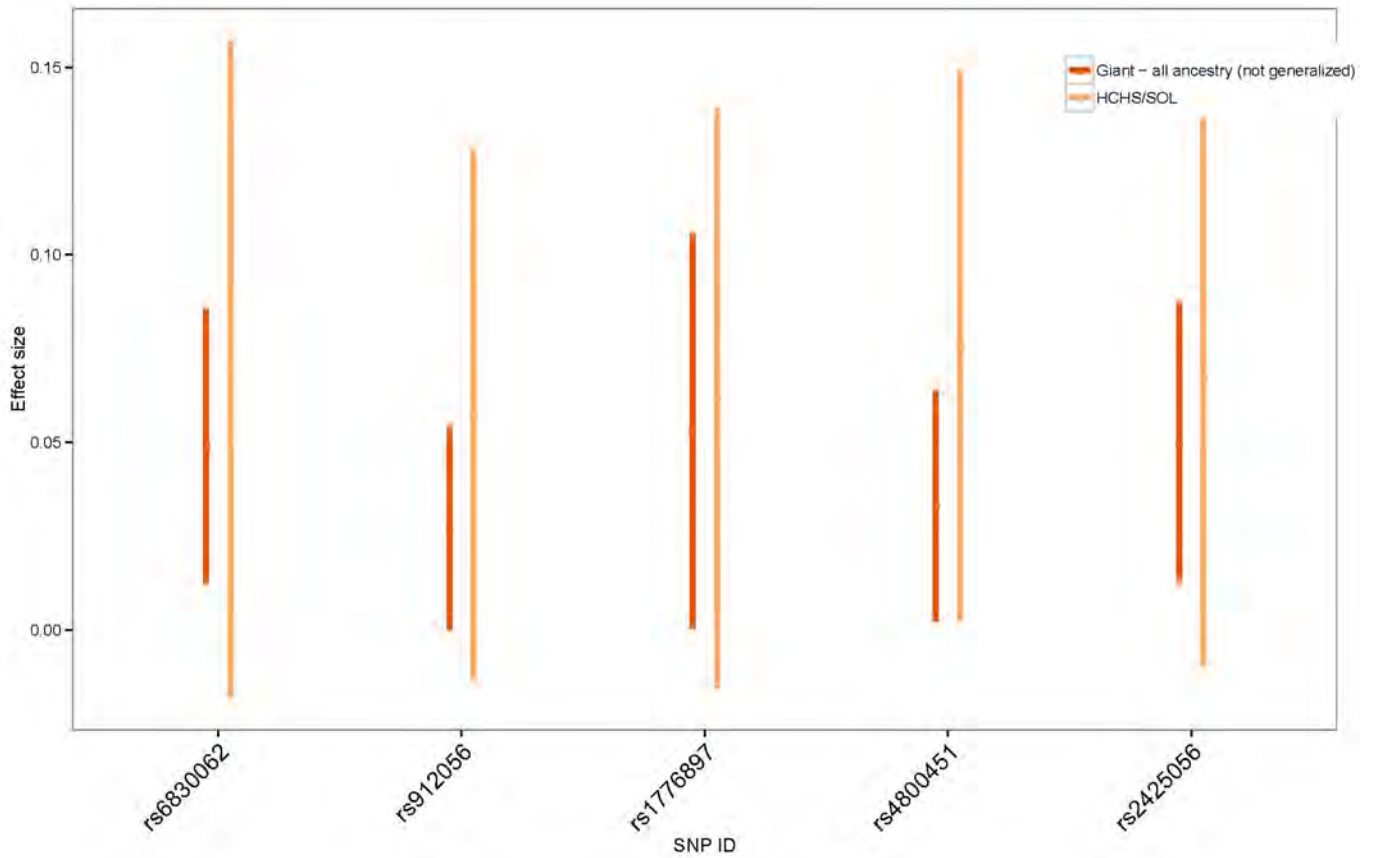

Supplementary Table 1. Study-specific descriptive statistics for discovery and replication cohorts. Abbreviations: WC - waist circumference; HIP - hip circumference; WHR - waist-to-hip ratio; BMI - body mass index.

| Study name                                         | Study Abbreviation | Study design                                                                 | Call rate | Study-specific exclusions                                                                                                                                                                                                       | For HL, % ancestry background for study sample (Mainland, Caribbean) | Measured/ Self-reported | MEN   |        |       |       |        |       |       |      |      |       |       |      | WOMEN |        |       |       |        |       |       |      |      |       |       |      | Analysis software             |                                      |                                  |                      |                                          |
|----------------------------------------------------|--------------------|------------------------------------------------------------------------------|-----------|---------------------------------------------------------------------------------------------------------------------------------------------------------------------------------------------------------------------------------|----------------------------------------------------------------------|-------------------------|-------|--------|-------|-------|--------|-------|-------|------|------|-------|-------|------|-------|--------|-------|-------|--------|-------|-------|------|------|-------|-------|------|-------------------------------|--------------------------------------|----------------------------------|----------------------|------------------------------------------|
|                                                    |                    |                                                                              |           |                                                                                                                                                                                                                                 |                                                                      |                         | WC    |        |       | HIP   |        |       | WHR   |      |      | BMI   |       |      | WC    |        |       | HIP   |        |       | WHR   |      |      | BMI   |       |      | Analysis software - phenotype | Analysis software - SNP associations | Genotyping platform              | Imputation software  | References for Study Design              |
|                                                    |                    |                                                                              |           |                                                                                                                                                                                                                                 |                                                                      |                         | N     | Mean   | SD    | N     | Mean   | SD    | N     | Mean | SD   | N     | Mean  | SD   | N     | Mean   | SD    | N     | Mean   | SD    | N     | Mean | SD   | N     | Mean  | SD   |                               |                                      |                                  |                      |                                          |
| <b>Hispanic/Latino</b>                             |                    |                                                                              |           |                                                                                                                                                                                                                                 |                                                                      |                         |       |        |       |       |        |       |       |      |      |       |       |      |       |        |       |       |        |       |       |      |      |       |       |      |                               |                                      |                                  |                      |                                          |
| Genetics of Latinos Diabetic Retinopathy           | GOLDR              | families recruited through diabete patients with eye disease                 | >=90%     | Family QC, Gender mismatch                                                                                                                                                                                                      | 98.13% Mainland, 1.87% Caribbean                                     | measured                | 219   | 103.90 | 14.58 | 54    | 103.06 | 13.44 | 54    | 0.98 | 0.06 | 223   | 31.03 | 6.25 | 371   | 107.32 | 14.32 | 84    | 110.38 | 15.72 | 84    | 0.95 | 0.05 | 374   | 32.63 | 7.02 | SAS 9.4                       | R (GWAF)                             | Omni Express                     | SHAPEIT, Minimac3    | PMCID: 3343221                           |
| Hispanic Community Health Study / Study of Latinos | HCHS/SOL           | Population based cohort                                                      | >=98%     | Gender mismatch; identity issues; PCA outliers                                                                                                                                                                                  | 55.51% Mainland, 44.49% Caribbean                                    | measured                | 5,200 | 99.10  | 13.41 | 5,200 | 103.58 | 10.08 | 5,200 | 0.96 | 0.07 | 5,200 | 29.07 | 5.32 | 7,272 | 97.76  | 14.36 | 7,272 | 108.42 | 13.14 | 7,272 | 0.90 | 0.07 | 7,272 | 30.34 | 6.48 | R 3.2.0                       | R (GENESIS)                          | HumanOmni2.5-8v1.1 + custom      | IMPUTE2              | PMIDs: 20609343,                         |
| Mexican-American Hypertension Study                | HTN                | families recruited through hypertensive probands.                            | >=95%     | Family QC, Gender mismatch, Bad Concordance OMNI1 and 15                                                                                                                                                                        | 90.43% Mainland, 9.57% Caribbean                                     | measured                | 253   | 95.04  | 14.73 | 248   | 101.71 | 9.76  | 248   | 0.94 | 0.07 | 312   | 28.91 | 5.24 | 362   | 89.70  | 14.48 | 358   | 106.21 | 11.77 | 357   | 0.85 | 0.07 | 451   | 29.52 | 6.06 | SAS 9.4                       | R (GWAF)                             | Omni Express + 1s                | SHAPEIT, IMPUTE2.3.0 | PMID: 11136689                           |
| Mexican-American Coronary Artery Disease           | MACAD              | CAD proband, spouse of proband, and adult offspring and spouses of offspring | >=95%     | Family QC, Gender mismatch, Bad Concordance OMNI1 and 15                                                                                                                                                                        | 94.84 Mainland, 5.16% Caribbean                                      | measured                | 311   | 96.53  | 11.40 | 311   | 103.41 | 8.92  | 311   | 0.93 | 0.06 | 346   | 28.92 | 4.52 | 417   | 90.46  | 13.19 | 416   | 105.69 | 11.89 | 416   | 0.86 | 0.07 | 457   | 29.00 | 5.58 | SAS 9.4                       | R (GWAF)                             | Omni Express + 1s                | SHAPEIT, IMPUTE2.3.0 | PMID: 14693718                           |
| Multi-Ethnic Study of Atherosclerosis              | MESA               | Population based                                                             | >=95%     | Gender mismatch; PCA outliers                                                                                                                                                                                                   | %67.8 Mexico ; 32.2% Caribbean                                       | measured                | 720   | 100.92 | 11.43 | 720   | 102.67 | 8.83  | 720   | 0.98 | 0.05 | 720   | 28.80 | 4.35 | 777   | 100.87 | 14.72 | 777   | 108.13 | 11.93 | 777   | 0.93 | 0.07 | 777   | 30.17 | 5.78 | SAS                           | SNPTEST2                             | AFFY6.0                          | IMPUTE2              | PMID: 12397006; Am J Epidemiol. 2002 Nov |
| Mexico-City Diabetes study                         | Mexico-City Cases  | Case/Control                                                                 | >=99%     | Related individuals; PCA outliers; Gender mismatch                                                                                                                                                                              | 100% Mexico                                                          | measured                | 360   | 99.03  | 12.42 | 360   | 101.51 | 10.02 | 360   | 0.97 | 0.07 | 360   | 28.59 | 5.15 | 534   | 95.82  | 12.14 | 534   | 106.83 | 12.07 | 534   | 0.90 | 0.06 | 535   | 30.40 | 5.48 | SPSS                          | SNPTEST                              | Affymetrix Axiom LAT             | SHAPEIT, IMPUTE2     | PMID: 26780889                           |
| 1982 Pelotas Birth Cohort                          | PELOTAS            | Prospective, population-based                                                | >=95%     | Samples excluded if there were sex mismatches (heterozygosity threshold: 0.02), heterozygosity rate outside the range of median $\pm$ 1.5 x IQR, missingness >3% and cryptic relatedness (kinship>0.1, as described in PMID: ). | NA                                                                   | measured                | 1,362 | 89.42  | 11.87 | 1,362 | 102.76 | 9.28  | 1,362 | 0.87 | 0.06 | 1,351 | 27.10 | 5.08 | 1,436 | 80.87  | 12.17 | 1,435 | 105.95 | 10.88 | 1,435 | 0.76 | 0.07 | 1,432 | 26.82 | 6.10 | R 3.2.0                       | R 3.2.0                              | HumanOmni2.5-8v1 (Illumina)      | IMPUTE2              | PMID: 16373375; PMID: 25733577           |
| Starr County Health Studies                        | STARR - Cases      | Case/Control                                                                 | 0.9995    | None                                                                                                                                                                                                                            | 31% Native American                                                  | measured                | 274   | 106.43 | 13.22 | 273   | 105.54 | 10.29 | 273   | 1.01 | 0.06 | 328   | 30.17 | 5.39 | 413   | 112.14 | 15.57 | 413   | 114.09 | 14.26 | 413   | 0.98 | 0.07 | 489   | 32.84 | 6.80 | Excel                         | SNPTEST                              | Affymetrix Genome-Wide Human SNP | IMPUTE2              | PMIDs: 8640221, 21647700                 |
| Starr County Health Studies                        | STARR - Contr      | Case/Control                                                                 | 0.9995    | None                                                                                                                                                                                                                            | 31% Native American                                                  | measured                | 223   | 100.86 | 12.88 | 223   | 106.11 | 9.30  | 223   | 0.95 | 0.06 | 223   | 29.37 | 5.27 | 556   | 94.79  | 15.08 | 555   | 110.13 | 13.26 | 553   | 0.86 | 0.07 | 558   | 30.45 | 6.58 | Excel                         | SNPTEST                              | Affymetrix Genome-Wide Human SNP | IMPUTE2              | PMIDs: 8640221, 21647700                 |
| Women's Health Initiative                          | WHI                | Prospective cohort study                                                     | >=95%     | first-degree relatives                                                                                                                                                                                                          | Unknown                                                              | measured                | NA    | NA     | NA    | NA    | NA     | NA    | NA    | NA   | NA   | NA    | NA    | NA   | 3,420 | 86.46  | 12.21 | 3,420 | 105.75 | 11.01 | 3,420 | 0.82 | 0.07 | 3,420 | 28.85 | 5.68 | STATA (v14)                   | PLINK/ Probable                      | AFFY6.0                          | MACH v1.0.16         | PMID: 9492970                            |
| <b>African American</b>                            |                    |                                                                              |           |                                                                                                                                                                                                                                 |                                                                      |                         |       |        |       |       |        |       |       |      |      |       |       |      |       |        |       |       |        |       |       |      |      |       |       |      |                               |                                      |                                  |                      |                                          |
| Atherosclerosis Risk in Communities Study          | ARIC               | Population based                                                             | >=90%     | first-degree relatives ; ancestry outliers ; gender mismatch; identity issues; excessive heterozygosity, missing height or weight                                                                                               | N/A                                                                  | measured                | 1,056 | 97.45  | 11.88 | 1,056 | 103.25 | 8.70  | 1,056 | 0.94 | 0.05 | 1,056 | 27.91 | 4.59 | 1,773 | 99.64  | 15.22 | 1,773 | 109.84 | 11.31 | 1,773 | 0.91 | 0.08 | 1,773 | 30.40 | 6.00 | STATA (v14)                   | PLINK/FAST                           | Affymetrix 6.0                   | MACH v1.0.16         | PMID: 2646917                            |
| Multi-Ethnic Study of Atherosclerosis              | MESA               | Population based                                                             | >=95%     | Gender mismatch; PCA outliers                                                                                                                                                                                                   | N/A                                                                  | measured                | 758   | 100.79 | 12.82 | 758   | 106.03 | 9.76  | 758   | 0.95 | 0.06 | 758   | 28.76 | 4.74 | 891   | 101.63 | 16.10 | 891   | 112.94 | 13.07 | 891   | 0.90 | 0.08 | 891   | 31.32 | 6.41 | SAS                           | SNPTEST2                             | AFFY6.0                          | IMPUTE2              | PMID: 12397006; Am J Epidemiol. 2002 Nov |
| Women's Health Initiative                          | WHI                | Prospective cohort study                                                     | >=95%     | first-degree relatives                                                                                                                                                                                                          | N/A                                                                  | measured                | NA    | NA     | NA    | NA    | NA     | NA    | NA    | NA   | NA   | NA    | NA    | NA   | 8,022 | 91.56  | 13.56 | 8,022 | 111.26 | 13.05 | 8,022 | 0.82 | 0.07 | 8,022 | 31.03 | 6.53 | STATA (v14)                   | PLINK/Probable                       | AFFY6.0                          | MACH v1.0.16         | PMID: 9492970                            |
| <b>European American</b>                           |                    |                                                                              |           |                                                                                                                                                                                                                                 |                                                                      |                         |       |        |       |       |        |       |       |      |      |       |       |      |       |        |       |       |        |       |       |      |      |       |       |      |                               |                                      |                                  |                      |                                          |
| Atherosclerosis Risk in Communities Study          | ARIC               | Population based                                                             | >=90%     | first-degree relatives ; ancestry outliers ; gender mismatch; identity issues; excessive heterozygosity; missing height or weight                                                                                               | N/A                                                                  | measured                | 4,281 | 99.62  | 10.21 | 4,281 | 102.71 | 7.25  | 4,281 | 0.97 | 0.05 | 4,281 | 27.42 | 3.89 | 4,795 | 92.75  | 14.34 | 4,795 | 103.92 | 10.31 | 4,795 | 0.89 | 0.08 | 4,795 | 26.47 | 5.27 | STATA (v14)                   | PLINK/FAST                           | Affymetrix 6.0                   | MACH v1.0.16         | PMID: 2646917                            |

**Supplementary Table 2.** Association and replication results for all loci that reached suggestive significance ( $P < 1 \times 10^{-6}$ ) in the discovery phase for WHRadjBMI. Abbreviations: CHR- chromosome number; POS- position (build GRCh38); EAF- effect allele frequency; SE- standard error.

| dnSNPID       | Nearest Gene | CHR | POS       | Known Locus<br>(PMID)      |   |   | Effect Allele | Other Allele | WITHOUT SOL |                |        |       |        |                  |         |      |        |         |                 |                |                |        |        |                 |        |         |                |        |         |        |        |         |         |        |        |
|---------------|--------------|-----|-----------|----------------------------|---|---|---------------|--------------|-------------|----------------|--------|-------|--------|------------------|---------|------|--------|---------|-----------------|----------------|----------------|--------|--------|-----------------|--------|---------|----------------|--------|---------|--------|--------|---------|---------|--------|--------|
|               |              |     |           |                            |   |   |               |              | SOL ONLY    |                |        |       |        | EUR <sup>‡</sup> |         |      |        |         | AA <sup>‡</sup> |                |                |        |        | HL <sup>‡</sup> |        |         |                |        | ALLMETA |        |        |         |         |        |        |
|               |              |     |           |                            |   |   |               |              | EAF         | Beta           | SE     | P     | N      | EAF              | Beta    | SE   | P      | ISQ     | N               | EAF            | Beta           | SE     | P      | ISQ             | N      | EAF     | Beta           | SE     | P       | ISQ    | N      | EAF     | Beta    | SE     | P      |
| <b>MEN</b>    |              |     |           |                            |   |   |               |              |             |                |        |       |        |                  |         |      |        |         |                 |                |                |        |        |                 |        |         |                |        |         |        |        |         |         |        |        |
| rs12032174    | RYP2         | 1   | 237692868 | -                          | T | C | 0.648         | 0.005        | 0.001       | 4.5E-07        | 5,200  | 0.627 | -0.002 | 0.001            | 1.2E-01 | -    | 4,165  | 0.606   | -0.001          | 0.002          | 5.5E-01        | 0      | 1,813  | 0.617           | 0.001  | 0.001   | 4.6E-01        | 0      | 4,030   | 0.619  | -0.001 | 0.001   | 4.6E-01 | 0      | 10,008 |
| rs10475310    | PLEKHG4B     | 5   | 23024     | -                          | C | G | 0.748         | -0.006       | 0.001       | <b>2.0E-08</b> | 5,200  | -     | -      | -                | -       | -    | 0.754  | -4.E-04 | 0.003           | 8.9E-01        | 0              | 758    | 0.749  | 0.001           | 0.001  | 4.4E-01 | 32.3           | 4,030  | 0.750   | 0.001  | 0.001  | 5.0E-01 | 24.9    | 4,788  |        |
| rs16977373    | RIT2         | 18  | 43189620  | -                          | A | C | 0.962         | -0.013       | 0.003       | 6.6E-07        | 5,200  | 0.997 | 0.007  | 0.010            | 4.8E-01 | -    | 4,165  | 0.793   | 0.001           | 0.002          | 5.5E-01        | 5.5    | 1,812  | 0.959           | 1.E-04 | 0.004   | 9.8E-01        | 0      | 2,735   | 0.839  | 0.001  | 0.002   | 5.1E-01 | 0      | 8,712  |
| rs721424      | CFAP61       | 20  | 20358666  | -                          | T | G | 0.484         | -0.005       | 0.001       | 8.2E-07        | 5,200  | 0.618 | -0.001 | 0.001            | 5.4E-01 | -    | 4,165  | 0.256   | 1.E-04          | 0.002          | 9.8E-01        | 50.1   | 1,813  | 0.493           | 0.002  | 0.001   | 6.0E-02        | 29.8   | 4,030   | 0.517  | 0.001  | 0.001   | 3.7E-01 | 33.5   | 10,008 |
| rs148213302   | STS          | 23  | 7416464   | -                          | T | C | 0.995         | 0.025        | 0.005       | 3.7E-07        | 5,189  | -     | -      | -                | -       | -    | 0.987  | -0.012  | 0.007           | 1.2E-01        | 0              | 758    | -      | -               | -      | -       | -              | -      | 0.987   | -0.012 | 0.007  | 1.2E-01 | 0       | 758    |        |
| <b>WOMEN</b>  |              |     |           |                            |   |   |               |              |             |                |        |       |        |                  |         |      |        |         |                 |                |                |        |        |                 |        |         |                |        |         |        |        |         |         |        |        |
| rs77377042    | MARCKSL1     | 1   | 32343334  | -                          | T | C | 0.024         | 0.018        | 0.004       | 8.0E-07        | 7,472  | -     | -      | -                | -       | -    | 0.127  | 0.002   | 0.002           | 1.7E-01        | 72.5           | 10,684 | 0.021  | 0.006           | 0.004  | 1.8E-01 | 0              | 6,998  | 0.113   | 0.003  | 0.002  | 7.7E-02 | 35      | 17,682 |        |
| rs75120960    | EPHA5        | 4   | 66367753  | -                          | A | G | 0.98          | -0.02        | 0.004       | 1.9E-07        | 7,472  | -     | -      | -                | -       | -    | 0.882  | -0.002  | 0.002           | 2.9E-01        | 49             | 10,683 | 0.983  | -0.001          | 0.005  | 9.0E-01 | 69.6           | 5,616  | 0.891   | -0.002 | 0.002  | 2.9E-01 | 52.6    | 16,299 |        |
| rs16922424    | FAM110B      | 8   | 57618850  | -                          | T | C | 0.982         | 0.021        | 0.004       | 4.9E-07        | 7,471  | -     | -      | -                | -       | -    | 0.892  | -0.002  | 0.002           | 2.2E-01        | 0              | 10,684 | 0.984  | 0.004           | 0.005  | 4.4E-01 | 26.6           | 5,616  | 0.900   | -0.002 | 0.002  | 3.4E-01 | 0       | 16,300 |        |
| rs79478137    | SLC22A18A5   | 11  | 2891739   | rs116895106<br>(28552196)* | T | C | 0.015         | -0.023       | 0.004       | 2.0E-07        | 7,472  | 0.009 | 4.E-04 | 0.011            | 9.7E-01 | -    | 4,678  | 0.084   | 0.001           | 0.002          | 7.7E-01        | 9.7    | 10,684 | 0.017           | -0.012 | 0.005   | 3.1E-02        | 0      | 6,582   | 0.074  | -0.001 | 0.002   | 6.2E-01 | 10.5   | 21,944 |
| rs113818604   | NTM          | 11  | 131960980 | -                          | A | G | 0.013         | -0.027       | 0.005       | 5.5E-08        | 7,471  | 0.023 | 0.001  | 0.006            | 9.0E-01 | -    | 4,678  | 0.004   | 0.003           | 0.009          | 7.6E-01        | 0      | 9,792  | 0.016           | -0.003 | 0.005   | 4.6E-01        | 0      | 6,786   | 0.017  | -0.001 | 0.003   | 7.3E-01 | 0      | 21,256 |
| rs115981023   | TAOK3        | 12  | 118313300 | -                          | A | G | 0.009         | 0.029        | 0.006       | 8.9E-07        | 7,472  | 0.003 | -0.005 | 0.017            | 8.0E-01 | -    | 4,678  | 0.049   | 0.002           | 0.002          | 3.9E-01        | 0      | 10,684 | 0.011           | 0.014  | 0.007   | 3.6E-02        | 71.5   | 5,616   | 0.044  | 0.003  | 0.002   | 1.4E-01 | 41.4   | 20,978 |
| rs146900844   | ZNF207       | 17  | 32378136  | -                          | A | G | 0.005         | -0.041       | 0.008       | 6.3E-07        | 7,472  | 0.008 | 0.015  | 0.012            | 1.9E-01 | -    | 4,678  | -       | -               | -              | -              | -      | 0.007  | -0.001          | 0.013  | 9.6E-01 | 0              | 1,419  | 0.008   | 0.008  | 0.009  | 3.5E-01 | 0       | 6,097  |        |
| rs61305557    | C19orf67     | 19  | 14081134  | -                          | A | G | 0.029         | -0.018       | 0.004       | 4.8E-07        | 7,472  | -     | -      | -                | -       | -    | 0.121  | 0.008   | 0.005           | 1.5E-01        | 0              | 1,771  | 0.030  | 0.002           | 0.006  | 7.6E-01 | 37.7           | 2,612  | 0.083   | 0.005  | 0.004  | 1.9E-01 | 19.1    | 4,383  |        |
| <b>ALL</b>    |              |     |           |                            |   |   |               |              |             |                |        |       |        |                  |         |      |        |         |                 |                |                |        |        |                 |        |         |                |        |         |        |        |         |         |        |        |
| rs13301996    | CDK5RAP2     | 9   | 120570806 | -                          | T | G | 0.808         | 0.005        | 0.001       | 5.7E-07        | 12,672 | 0.794 | 5.E-04 | 0.001            | 7.6E-01 | -    | 8,845  | 0.872   | 0.004           | 0.001          | 1.1E-02        | 0      | 12,496 | 0.811           | 0.001  | 0.001   | 1.9E-01        | 0      | 12,341  | 0.823  | 0.002  | 0.001   | 1.7E-02 | 0      | 33,682 |
| rs115981023   | TAOK3        | 12  | 118313300 | -                          | A | G | 0.008         | 0.023        | 0.004       | 2.1E-07        | 12,672 | 0.003 | 0.002  | 0.012            | 8.7E-01 | -    | 8,845  | 0.049   | 0.001           | 0.002          | 6.3E-01        | 0      | 12,496 | 0.009           | 0.010  | 0.005   | 5.8E-02        | 64.5   | 8,456   | 0.043  | 0.002  | 0.002   | 2.5E-01 | 38.4   | 29,797 |
| rs185566196   | KIAA0391     | 14  | 35152593  | rs12435790<br>(30239722)   | T | C | 0.011         | 0.019        | 0.004       | 2.6E-07        | 12,672 | 0.003 | 0.003  | 0.017            | 8.8E-01 | -    | 8,844  | 0.090   | 0.003           | 0.002          | 1.2E-01        | 0      | 12,496 | 0.017           | -0.004 | 0.004   | 3.3E-01        | 44.3   | 9,142   | 0.078  | 0.002  | 0.002   | 2.9E-01 | 22.3   | 30,482 |
| rs116612483   | CDH4         | 20  | 60751325  | -                          | A | G | 0.006         | 0.027        | 0.005       | 6.0E-07        | 12,672 | -     | -      | -                | -       | -    | 0.029  | -0.007  | 0.003           | 1.5E-02        | 0              | 12,496 | 0.005  | -0.007          | 0.007  | 3.2E-01 | 63.6           | 7,680  | 0.025   | -0.007 | 0.003  | 8.9E-03 | 17.4    | 20,176 |        |
| <b>MEN</b>    |              |     |           |                            |   |   |               |              |             |                |        |       |        |                  |         |      |        |         |                 |                |                |        |        |                 |        |         |                |        |         |        |        |         |         |        |        |
| rs12032174    | RYP2         | 1   | 237692868 | -                          | T | C | 0.648         | 0.005        | 0.001       | 4.5E-07        | 5,200  | 0.639 | 0.002  | 0.001            | 5.1E-03 | 94.9 | 9,365  | 0.638   | 0.004           | 0.001          | 4.6E-05        | 78.7   | 7,013  | 0.634           | 0.003  | 0.001   | 2.3E-05        | 33.6   | 9,230   | 0.629  | 0.001  | 0.001   | 1.7E-02 | 59     | 15,208 |
| rs10475310    | PLEKHG4B     | 5   | 23024     | -                          | C | G | 0.748         | -0.006       | 0.001       | <b>2.0E-08</b> | 5,200  | -     | -      | -                | -       | -    | 0.749  | -0.006  | 0.001           | <b>8.5E-09</b> | 65             | 5,958  | 0.748  | -0.003          | 0.001  | 2.5E-05 | 70.6           | 9,230  | 0.749   | -0.003 | 0.001  | 3.8E-05 | 68.2    | 9,988  |        |
| rs16977373    | RIT2         | 18  | 43189620  | -                          | A | C | 0.962         | -0.013       | 0.003       | 6.6E-07        | 5,200  | 0.965 | -0.011 | 0.003            | 8.1E-05 | 73.3 | 9,365  | 0.847   | -0.003          | 0.002          | 5.0E-02        | 87.8   | 7,012  | 0.961           | -0.008 | 0.002   | 9.1E-04        | 60.9   | 7,935   | 0.870  | -0.003 | 0.002   | 1.0E-01 | 65.8   | 13,912 |
| rs721424      | CFAP61       | 20  | 20358666  | -                          | T | G | 0.484         | -0.005       | 0.001       | 8.2E-07        | 5,200  | 0.541 | -0.003 | 0.001            | 2.8E-05 | 87.3 | 9,365  | 0.443   | -0.004          | 0.001          | 6.2E-06        | 69.6   | 7,013  | 0.488           | -0.002 | 0.001   | 1.5E-02        | 73.6   | 9,230   | 0.505  | -0.001 | 0.001   | 2.3E-02 | 67.7   | 15,208 |
| rs148213302   | STS          | 23  | 7416464   | -                          | T | C | 0.995         | 0.025        | 0.005       | 3.7E-07        | 5,189  | -     | -      | -                | -       | -    | 0.993  | 0.014   | 0.004           | 1.1E-03        | 94             | 5,947  | -      | -               | -      | -       | -              | -      | 0.993   | 0.014  | 0.004  | 1.1E-03 | 94      | 5,947  |        |
| <b>WOMEN</b>  |              |     |           |                            |   |   |               |              |             |                |        |       |        |                  |         |      |        |         |                 |                |                |        |        |                 |        |         |                |        |         |        |        |         |         |        |        |
| rs77377042    | MARCKSL1     | 1   | 32343334  | -                          | T | C | 0.024         | 0.018        | 0.004       | 8.0E-07        | 7,472  | -     | -      | -                | -       | -    | 0.112  | 0.005   | 0.002           | 3.0E-03        | 85.4           | 18,156 | 0.023  | 0.012           | 0.003  | 2.9E-05 | 33.6           | 14,470 | 0.101   | 0.005  | 0.001  | 1.1E-03 | 64.1    | 25,154 |        |
| rs75120960    | EPHA5        | 4   | 66367753  | -                          | A | G | 0.98          | -0.02        | 0.004       | 1.9E-07        | 7,472  | -     | -      | -                | -       | -    | 0.895  | -0.004  | 0.002           | 4.9E-03        | 86.4           | 18,155 | 0.981  | -0.012          | 0.003  | 7.4E-05 | 81.1           | 13,088 | 0.902   | -0.004 | 0.001  | 6.2E-03 | 79.4    | 23,771 |        |
| rs16922424    | FAM110B      | 8   | 57618850  | -                          | T | C | 0.982         | 0.021        | 0.004       | 4.9E-07        | 7,471  | -     | -      | -                | -       | -    | 0.905  | 0.001   | 0.002           | 4.0E-01        | 89.7           | 18,155 | 0.983  | 0.015           | 0.003  | 3.4E-06 | 67.8           | 13,087 | 0.911   | 0.002  | 0.002  | 3.1E-01 | 81.3    | 23,771 |        |
| rs79478137    | SLC22A18A5   | 11  | 2891739   | rs116895106<br>(28552196)* | T | C | 0.015         | -0.023       | 0.004       | 2.0E-07        | 7,472  | 0.014 | -0.020 | 0.004            | 6.7E-08 | 74.5 | 12,150 | 0.070   | -0.005          | 0.002          | 1.6E-02        | 89.9   | 18,156 | 0.016           | -0.019 | 0.003   | <b>3.6E-09</b> | 2.8    | 14,054  | 0.063  | -0.005 | 0.002   | 3.4E-03 | 73.3   | 29,416 |
| rs113818604   | NTM          | 11  | 131960980 | -                          | A | G | 0.013         | -0.027       | 0.005       | 5.5E-08        | 7,471  | 0.018 | -0.015 | 0.004            | 7.6E-05 | 92.6 | 12,149 | 0.011   | -0.020          | 0.004          | 5.1E-06        | 76.7   | 17,263 | 0.015           | -0.014 | 0.003   | 2.7E-05        | 63.8   | 14,257  | 0.016  | -0.009 | 0.003   | 1.1E-03 | 62.1   | 28,727 |
| rs115981023   | TAOK3        | 12  | 118313300 | -                          | A | G | 0.009         | 0.029        | 0.006       | 8.9E-07        | 7,472  | 0.008 | 0.025  | 0.006            | 7.3E-06 | 69.9 | 12,150 | 0.044   | 0.006           | 0.002          | 1.0E-02        | 83     | 18,156 | 0.010           | 0.022  | 0.005   | 5.7E-07        | 69.4   | 13,088  | 0.040  | 0.006  | 0.002   | 2.4E-03 | 73.6   | 28,450 |
| rs146900844   | ZNF207       | 17  | 32378136  | -                          | A | G | 0.005         | -0.041       | 0.008       | 6.3E-07        | 7,472  | 0.006 | -0.023 | 0.007            | 4.3E-04 | 93.6 | 12,150 | -       | -               | -              | -              | -      | 0.006  | -0.030          | 0.007  | 1.0E-05 | 85.2           | 8,891  | 0.006   | -0.019 | 0.006  | 1.5E-03 | 88.8    | 13,569 |        |
| rs61305557    | C19orf67     | 19  | 14081134  | -                          | A | G | 0.029         | -0.018       | 0.004       | 4.8E-07        | 7,472  | -     | -      | -                | -       | -    | 0.062  | -0.009  | 0.003           | 6.3E-03        | 93.3           | 9,243  | 0.029  | -0.012          | 0.003  | 2.7E-04 | 70.9           | 10,084 | 0.055   | -0.007 | 0.003  | 2.2E-02 | 80.4    | 11,855 |        |
| <b>ALL</b>    |              |     |           |                            |   |   |               |              |             |                |        |       |        |                  |         |      |        |         |                 |                |                |        |        |                 |        |         |                |        |         |        |        |         |         |        |        |
| rs13301996    | CDK5RAP2     | 9   | 120570806 | -                          | T | G | 0.808         | 0.005        | 0.001       | 5.7E-07        | 12,672 | 0.804 | 0.004  | 0.001            | 1.6E-05 | 84.5 | 21,517 | 0.830   | 0.005           | 0.001          | <b>2.9E-08</b> | 0      | 25,168 | 0.809           | 0.003  | 0.001   | 6.1E-06        | 19.5   | 25,013  | 0.818  | 0.003  | 0.001   | 1.1E-06 | 13.1   | 46,354 |
| rs115981023</ |              |     |           |                            |   |   |               |              |             |                |        |       |        |                  |         |      |        |         |                 |                |                |        |        |                 |        |         |                |        |         |        |        |         |         |        |        |

**Supplementary Table 3.** Association and replication results for all loci that reached suggestive significance ( $P < 1 \times 10^{-6}$ ) in the discovery phase for WCadjBMI. Abbreviations: CHR- chromosome number; POS- position (build GRCh38); EAF- effect allele frequency; SE- standard error.

| dnSNPID      | Nearest Gene | CHR | POS       | Known Locus                                                                |               |              | SOL ONLY |        |       |         |        |       |                  |       |         |      |       |       |                 |       |         |      |        |       | WITHOUT SOL     |       |         |      |        |       |         |       |         |        |        |         |       |         |   |       |  |  |
|--------------|--------------|-----|-----------|----------------------------------------------------------------------------|---------------|--------------|----------|--------|-------|---------|--------|-------|------------------|-------|---------|------|-------|-------|-----------------|-------|---------|------|--------|-------|-----------------|-------|---------|------|--------|-------|---------|-------|---------|--------|--------|---------|-------|---------|---|-------|--|--|
|              |              |     |           | (PMID)                                                                     | Effect Allele | Other Allele | SOL ONLY |        |       |         |        |       | EUR <sup>†</sup> |       |         |      |       |       | AA <sup>‡</sup> |       |         |      |        |       | HL <sup>§</sup> |       |         |      |        |       | ALLMETA |       |         |        |        |         |       |         |   |       |  |  |
|              |              |     |           |                                                                            |               |              | EAF      | Beta   | SE    | P       | N      | EAF   | Beta             | SE    | P       | ISQ  | N     | EAF   | Beta            | SE    | P       | ISQ  | N      | EAF   | Beta            | SE    | P       | ISQ  | N      | EAF   | Beta    | SE    | P       | ISQ    | N      |         |       |         |   |       |  |  |
| <b>MEN</b>   |              |     |           |                                                                            |               |              |          |        |       |         |        |       |                  |       |         |      |       |       |                 |       |         |      |        |       |                 |       |         |      |        |       |         |       |         |        |        |         |       |         |   |       |  |  |
| rs74346221   | GABRD        | 1   | 2029024   | -                                                                          | T             | G            | 0.019    | -2.023 | 0.410 | 8.1E-07 | 5,202  | 0.002 | 2.847            | 4.337 | 5.1E-01 | -    | 4,165 | 0.083 | -2.883          | 1.361 | 3.4E-02 | 0    | 1,054  | 0.017 | 0.240           | 0.663 | 7.2E-01 | 0    | 1,344  | 0.029 | -0.360  | 0.596 | 5.5E-01 | 76.5   | 2,398  |         |       |         |   |       |  |  |
| rs72693785   | ATP1A1       | 1   | 116334965 | -                                                                          | T             | C            | 0.006    | -4.088 | 0.734 | 2.5E-08 | 5,203  | 0.008 | -0.806           | 1.660 | 6.3E-01 | -    | 4,165 | -     | -               | -     | -       | -    | -      | -     | -               | -     | -       | -    | -      | -     | -       | -     | -       | -      | 0.008  | -0.806  | 1.660 | 6.3E-01 | 0 | 4,165 |  |  |
| rs11583298   | ESRRG        | 1   | 217171261 | -                                                                          | T             | C            | 0.822    | -0.711 | 0.140 | 4.0E-07 | 5,203  | 0.899 | -0.477           | 0.378 | 2.1E-01 | -    | 4,166 | 0.977 | -1.496          | 0.820 | 6.8E-02 | 0    | 1,813  | 0.816 | 0.076           | 0.155 | 6.2E-01 | 0    | 4,206  | 0.833 | -0.048  | 0.142 | 7.3E-01 | 8.7    | 10,185 |         |       |         |   |       |  |  |
| rs76842062   | MAP4K4       | 2   | 101847192 | -                                                                          | T             | G            | 0.995    | 3.799  | 0.720 | 1.3E-07 | 5,203  | -     | -                | -     | -       | -    | -     | 0.946 | 0.452           | 0.531 | 3.9E-01 | 0    | 1,813  | -     | -               | -     | -       | -    | -      | -     | -       | -     | -       | -      | 0.984  | 1.393   | 1.088 | 2.0E-01 | 0 | 1,812 |  |  |
| rs141365360  | LOC102723448 | 3   | 21826     | -                                                                          | A             | G            | 0.007    | 3.154  | 0.629 | 5.3E-07 | 5,203  | -     | -                | -     | -       | -    | -     | 0.012 | -1.676          | 1.672 | 3.2E-01 | 0    | 1,813  | 0.012 | 0.749           | 0.743 | 3.1E-01 | 0    | 1,344  | 0.035 | 0.382   | 0.488 | 4.3E-01 | 0      | 2,102  |         |       |         |   |       |  |  |
| rs6809759    | PROK2        | 3   | 71937742  | rs7628338, rs6549455 (28448500); rs12330322 (25673412, 28443625, 28448500) | A             | G            | 0.497    | -0.586 | 0.102 | 9.4E-09 | 5,203  | 0.637 | 0.117            | 0.235 | 6.2E-01 | -    | 4,166 | 0.394 | -0.014          | 0.239 | 9.6E-01 | 0    | 1,812  | 0.507 | 0.033           | 0.111 | 7.7E-01 | 0    | 4,206  | 0.510 | 0.039   | 0.092 | 6.8E-01 | 0      | 10,184 |         |       |         |   |       |  |  |
| rs76941364   | COBL         | 7   | 52064843  | -                                                                          | A             | G            | 0.989    | 2.443  | 0.498 | 9.4E-07 | 5,203  | 0.999 | 7.885            | 3.328 | 1.8E-02 | -    | 4,165 | 0.984 | 1.393           | 1.088 | 2.0E-01 | 0    | 1,812  | 0.990 | 0.059           | 0.679 | 9.3E-01 | 0    | 2,064  | 0.963 | 0.421   | 0.415 | 3.1E-01 | 31.6   | 8,042  |         |       |         |   |       |  |  |
| rs139139519  | SULF1        | 8   | 69625608  | -                                                                          | A             | G            | 0.012    | -2.365 | 0.458 | 2.4E-07 | 5,203  | 0.012 | -0.941           | 1.113 | 4.0E-01 | -    | 4,166 | 0.052 | 0.105           | 0.647 | 8.7E-01 | 0    | 758    | 0.016 | 0.132           | 0.550 | 8.1E-01 | 0    | 2,375  | 0.015 | -0.207  | 0.473 | 6.6E-01 | 0      | 8,354  |         |       |         |   |       |  |  |
| rs35569658   | RBFOX1       | 16  | 5754433   | -                                                                          | C             | G            | 0.313    | -0.562 | 0.112 | 5.3E-07 | 5,203  | 0.234 | -0.167           | 0.272 | 5.4E-01 | -    | 4,166 | 0.148 | 0.025           | 0.344 | 9.4E-01 | 3.8  | 1,813  | 0.341 | -0.123          | 0.167 | 4.6E-01 | 32.2 | 2,862  | 0.288 | -0.111  | 0.132 | 4.0E-01 | 13.5   | 8,841  |         |       |         |   |       |  |  |
| rs148280037  | SHISA9       | 16  | 12886370  | -                                                                          | T             | C            | 0.984    | 2.081  | 0.412 | 4.5E-07 | 5,203  | 0.989 | -0.648           | 1.114 | 5.6E-01 | -    | 4,166 | 0.984 | 0.809           | 1.117 | 4.7E-01 | 0    | 1,813  | 0.986 | 0.053           | 0.581 | 9.3E-01 | 52.6 | 2,338  | 0.986 | 0.062   | 0.468 | 8.9E-01 | 10.2   | 8,317  |         |       |         |   |       |  |  |
| rs143565319  | PIK3C3       | 18  | 40962346  | -                                                                          | T             | C            | 0.989    | 2.669  | 0.497 | 7.8E-08 | 5,203  | -     | -                | -     | -       | -    | -     | 0.932 | -0.614          | 0.475 | 2.0E-01 | 18.3 | 1,813  | 0.987 | 0.391           | 0.637 | 5.4E-01 | 0    | 2,064  | 0.951 | -0.255  | 0.381 | 5.0E-01 | 0      | 3,877  |         |       |         |   |       |  |  |
| <b>WOMEN</b> |              |     |           |                                                                            |               |              |          |        |       |         |        |       |                  |       |         |      |       |       |                 |       |         |      |        |       |                 |       |         |      |        |       |         |       |         |        |        |         |       |         |   |       |  |  |
| rs112469617  | FZD7         | 2   | 201982887 | -                                                                          | T             | C            | 0.009    | -2.977 | 0.594 | 5.5E-07 | 7,471  | -     | -                | -     | -       | -    | -     | 0.034 | 0.085           | 0.397 | 8.3E-01 | 69.8 | 10,683 | 0.005 | -1.154          | 1.295 | 3.7E-01 | 0    | 1,420  | 0.031 | -0.022  | 0.380 | 9.5E-01 | 59.7   | 12,103 |         |       |         |   |       |  |  |
| rs17385466   | SOX5         | 12  | 23639004  | -                                                                          | T             | C            | 0.923    | 1.089  | 0.209 | 1.8E-07 | 7,471  | 0.883 | -0.945           | 0.466 | 4.3E-02 | -    | 4,678 | 0.974 | 0.507           | 0.366 | 1.7E-01 | 0    | 10,684 | 0.901 | 0.087           | 0.170 | 6.1E-01 | 57.7 | 8,613  | 0.911 | 0.053   | 0.146 | 7.2E-01 | 53.1   | 23,975 |         |       |         |   |       |  |  |
| <b>ALL</b>   |              |     |           |                                                                            |               |              |          |        |       |         |        |       |                  |       |         |      |       |       |                 |       |         |      |        |       |                 |       |         |      |        |       |         |       |         |        |        |         |       |         |   |       |  |  |
| rs77993329   | ACTR2        | 1   | 3001535   | -                                                                          | A             | G            | 0.020    | -1.457 | 0.288 | 4.1E-07 | 12,673 | 0.005 | -0.540           | 1.349 | 6.9E-01 | -    | 8,845 | 0.095 | -0.144          | 0.191 | 4.5E-01 | 66.9 | 12,497 | 0.013 | -0.140          | 0.093 | 1.3E-01 | 66.2 | 9,803  | 0.029 | -0.142  | 0.084 | 8.9E-02 | 57     | 31,145 |         |       |         |   |       |  |  |
| rs138819965  | LINC00299    | 2   | 8304328   | -                                                                          | A             | G            | 0.994    | 2.706  | 0.525 | 2.5E-07 | 12,674 | -     | -                | -     | -       | -    | -     | 0.964 | -0.095          | 0.274 | 7.3E-01 | 0    | 12,497 | 0.995 | -0.042          | 0.632 | 9.5E-01 | 0    | 7,681  | 0.969 | -0.087  | 0.251 | 7.3E-01 | 0      | 20,178 |         |       |         |   |       |  |  |
| rs77319470   | ADAMTS3      | 4   | 72638360  | rs7697556 (28443625); rs10518107 (26785701); rs16848284 (28448500)         | T             | G            | 0.371    | 0.406  | 0.082 | 8.6E-07 | 12,674 | 0.417 | 0.146            | 0.204 | 4.7E-01 | -    | 8,844 | 0.504 | -0.198          | 0.110 | 7.3E-02 | 45.3 | 12,496 | 0.344 | 0.012           | 0.017 | 4.8E-01 | 56.5 | 12,819 | 0.348 | 0.008   | 0.016 | 6.2E-01 | 54.1   | 34,159 |         |       |         |   |       |  |  |
| rs921999     | FGF5         | 4   | 80296998  | -                                                                          | A             | C            | 0.965    | -1.104 | 0.222 | 6.7E-07 | 12,674 | 0.999 | 1.464            | 3.837 | 7.0E-01 | -    | 8,844 | 0.829 | 0.054           | 0.142 | 7.0E-01 | 80.5 | 12,496 | 0.989 | 0.056           | 0.084 | 5.0E-01 | 0    | 12,819 | 0.947 | 0.056   | 0.072 | 4.3E-01 | 6.5    | 34,159 |         |       |         |   |       |  |  |
| rs112404395  | AP3B1        | 5   | 77964563  | -                                                                          | C             | G            | 0.991    | -2.220 | 0.412 | 7.1E-08 | 12,674 | 0.985 | 0.412            | 0.991 | 6.8E-01 | -    | 8,844 | 0.997 | -3.848          | 4.427 | 3.8E-01 | 0    | 2,825  | 0.992 | 0.025           | 0.142 | 8.6E-01 | 0    | 4,390  | 0.992 | 0.029   | 0.140 | 8.4E-01 | 0      | 16,059 |         |       |         |   |       |  |  |
| rs77264633   | CCDC171      | 9   | 15823920  | -                                                                          | A             | G            | 0.962    | -1.118 | 0.205 | 4.6E-08 | 12,674 | 0.928 | 0.161            | 0.385 | 6.8E-01 | -    | 8,844 | 0.973 | 0.620           | 0.386 | 1.1E-01 | 0    | 12,497 | 0.975 | -0.006          | 0.049 | 9.0E-01 | 44.3 | 12,819 | 0.974 | 0.006   | 0.048 | 9.0E-01 | 35.9   | 34,160 |         |       |         |   |       |  |  |
| rs184067184  | PHF21A       | 11  | 46189280  | -                                                                          | A             | C            | 0.006    | -3.612 | 0.702 | 2.7E-07 | 12,674 | -     | -                | -     | -       | -    | -     | -     | -               | -     | -       | -    | -      | 0.010 | 0.282           | 1.287 | 8.3E-01 | 0    | 1,497  | 0.010 | 0.282   | 1.287 | 8.3E-01 | 0      | 1,497  |         |       |         |   |       |  |  |
| rs3168072    | FADS2        | 11  | 61864038  | -                                                                          | A             | T            | 0.725    | 0.514  | 0.102 | 5.3E-07 | 12,674 | 0.975 | 2.013            | 0.632 | 1.5E-03 | -    | 8,845 | 0.977 | -0.233          | 0.363 | 5.2E-01 | 0    | 12,497 | 0.711 | 0.001           | 0.017 | 9.6E-01 | 0    | 12,819 | 0.711 | 0.002   | 0.017 | 9.2E-01 | 22.1   | 34,161 |         |       |         |   |       |  |  |
| rs6206780    | WSB2         | 12  | 118041899 | -                                                                          | T             | C            | 0.013    | 1.780  | 0.350 | 3.7E-07 | 12,674 | 0.025 | 0.676            | 0.779 | 3.9E-01 | -    | 8,844 | 0.103 | -0.062          | 0.178 | 7.3E-01 | 0    | 12,496 | 0.021 | -0.037          | 0.065 | 5.7E-01 | 9.3  | 10,490 | 0.031 | -0.036  | 0.061 | 5.6E-01 | 0      | 31,830 |         |       |         |   |       |  |  |
| <b>MEN</b>   |              |     |           |                                                                            |               |              |          |        |       |         |        |       |                  |       |         |      |       |       |                 |       |         |      |        |       |                 |       |         |      |        |       |         |       |         |        |        |         |       |         |   |       |  |  |
| rs74346221   | GABRD        | 1   | 2029024   | -                                                                          | T             | G            | 0.019    | -2.023 | 0.410 | 8.1E-07 | 5,202  | 0.024 | -2.095           | 0.393 | 9.5E-08 | 0    | 6,256 | 0.024 | -2.095          | 0.393 | 9.5E-08 | 0    | 6,256  | 0.018 | -1.398          | 0.349 | 6.2E-05 | 88.1 | 6,546  | 0.022 | -1.489  | 0.338 | 1.1E-05 | 79     | 7,600  |         |       |         |   |       |  |  |
| rs72693785   | ATP1A1       | 1   | 116334965 | -                                                                          | T             | C            | 0.006    | -4.088 | 0.734 | 2.5E-08 | 5,203  | 0.006 | -3.551           | 0.671 | 1.2E-07 | 69.4 | 9,368 | -     | -               | -     | -       | -    | -      | -     | -               | -     | -       | -    | -      | -     | -       | -     | 0.006   | -3.551 | 0.671  | 1.2E-07 | 69.4  | 9,368   |   |       |  |  |
| rs11583298   | ESRRG        | 1   | 217171261 | -                                                                          | T             | C            | 0.822    | -0.711 | 0.140 | 4.0E-07 | 5,203  | 0.831 | -0.683           | 0.131 | 2.0E-07 | 0    | 9,369 | 0.826 | -0.733          | 0.138 | 1.1E-07 | 0    | 7,016  | 0.819 | -0.358          | 0.104 | 5.7E-04 | 57.4 | 9,409  | 0.827 | -0.383  | 0.100 | 1.2E-04 | 48.1   | 15,388 |         |       |         |   |       |  |  |
| rs76842062   | MAP4K4       | 2   | 101847192 | -                                                                          | T             | G            | 0.995    | 3.799  | 0.720 | 1.3E-07 | 5,203  | -     | -                | -     | -       | -    | -     | 0.969 | 1.511           | 0.363 | 3.2E-05 | 73.9 | 7,016  | -     | -               | -     | -       | -    | -      | -     | -       | -     | 0.992   | 3.066  | 0.601  | 3.3E-07 | 44    | 7,015   |   |       |  |  |
| rs141365360  | LOC102723448 | 3   | 21826     | -                                                                          | A             | G            | 0.007    | 3.154  | 0.629 | 5.3E-07 | 5,203  | -     | -                | -     | -       | -    | -     | 0.012 | -2.317          | 0.442 | 1.6E-07 | 0    | 7,016  | 0.009 | 2.151           | 0.480 | 7.5E-06 | 83.6 | 6,547  | 0.024 | 1.423   | 0.386 | 2.2E-04 | 84.1   | 7,305  |         |       |         |   |       |  |  |
| rs6809759    | PROK2        | 3   | 71937742  | rs7628338, rs6549455 (28448500); rs12330322 (25673412, 28443625, 28448500) | A             | G            | 0.497    | -0.586 | 0.102 | 9.4E-09 | 5,203  | 0.519 | -0.474           | 0.094 | 4.0E-07 | 86.7 | 9,369 | 0.481 | -0.498          | 0.094 | 1.1E-07 | 59.2 | 7,015  | 0.502 | -0.302          | 0.075 | 5.7E-05 | 54.4 | 9,409  | 0.504 | -0.243  | 0.069 | 3.9E-04 | 49.3   | 15,387 |         |       |         |   |       |  |  |
| rs76941364   | COBL         | 7   | 52064843  | -                                                                          | A             | G            | 0.989    | 2.443  | 0.498 | 9.4E-07 | 5,203  | 0.989 | 2.562            | 0.493 | 2.0E-07 | 61.8 | 9,368 | 0.992 | 3.066           | 0.601 | 3.3E-07 | 44   | 7,015  | 0.989 | 1.609           | 0.402 | 6.1E-05 | 76.1 | 7,267  | 0.974 | 1.249   | 0.319 | 8.9E-05 | 67.9   | 13,245 |         |       |         |   |       |  |  |
| rs139139519  | SULF1        | 8   | 69625608  | -                                                                          | A             | G            | 0.012    | -2.365 | 0.458 | 2.4E-07 | 5,203  | 0.012 | -2.159           | 0.424 | 3.5E-07 | 28.6 | 9,369 | 0.029 | 1.671           | 0.451 | 2.1E-04 | 91.3 | 5,961  | 0.014 | -1.343          | 0.352 | 1.4E-04 | 77.2 | 7,578  | 0.013 | -1.321  | 0.329 | 6.0E-05 | 55     | 13,557 |         |       |         |   |       |  |  |
| rs35569658   | RBFOX1       | 16  | 5754433   | -                                                                          | C             | G            | 0.313    | -0.562 | 0.112 | 5.3E-07 | 5,203  | 0.302 | -0.505           | 0.104 | 1.1E-06 | 44.6 | 9,369 | 0.2   |                 |       |         |      |        |       |                 |       |         |      |        |       |         |       |         |        |        |         |       |         |   |       |  |  |







|             |              |    |           |                         |   |   |       |        |       |         |        |       |        |                |      |        |       |        |         |      |        |       |        |         |      |        |       |        |         |      |        |
|-------------|--------------|----|-----------|-------------------------|---|---|-------|--------|-------|---------|--------|-------|--------|----------------|------|--------|-------|--------|---------|------|--------|-------|--------|---------|------|--------|-------|--------|---------|------|--------|
| rs10818474  | MEGF9        | 9  | 120727686 | rs7044106<br>(25673412) | T | C | 0.809 | -0.002 | 0.000 | 5.1E-07 | 7,462  | 0.787 | -3.834 | 1.3E-04        | 90.5 | 12,235 | 0.669 | -4.123 | 3.7E-05 | 71.3 | 18,144 | 0.776 | -3.228 | 1.3E-03 | 62   | 14,807 | 0.700 | -2.900 | 3.7E-03 | 52.6 | 30,262 |
| rs28692724  | IRF2BPL      | 14 | 77027445  | -                       | T | C | 0.425 | 0.002  | 0.000 | 7.3E-07 | 7,462  | 0.378 | 5.490  | <b>4.0E-08</b> | 8.3  | 12,140 | 0.328 | 2.956  | 3.1E-03 | 86.6 | 18,145 | 0.415 | 4.053  | 5.1E-05 | 45.8 | 10,722 | 0.331 | 3.512  | 4.5E-04 | 66.1 | 26,083 |
| rs6092086   | LOC105372676 | 20 | 55193568  | -                       | A | G | 0.922 | -0.003 | 0.001 | 3.4E-07 | 7,462  | 0.948 | -3.318 | 9.1E-04        | 93.8 | 12,141 | 0.764 | -3.296 | 9.8E-04 | 81.4 | 18,146 | 0.932 | -3.053 | 2.3E-03 | 67   | 15,693 | 0.845 | -1.762 | 7.8E-02 | 63.5 | 31,056 |
| rs9631175   | TAF4         | 20 | 62072648  | -                       | A | C | 0.793 | 0.002  | 0.000 | 6.0E-08 | 7462   | 0.827 | 3.978  | 7.0E-05        | 92.7 | 12,141 | 0.770 | 4.762  | 1.9E-06 | 71.4 | 18,145 | 0.800 | 4.422  | 9.8E-06 | 56.6 | 15,777 | 0.797 | 3.960  | 7.5E-05 | 54.7 | 31,139 |
| <b>ALL</b>  |              |    |           |                         |   |   |       |        |       |         |        |       |        |                |      |        |       |        |         |      |        |       |        |         |      |        |       |        |         |      |        |
| rs144655586 | CLSPN        | 1  | 35725381  | -                       | T | C | 0.012 | 0.007  | 0.001 | 1.7E-07 | 12,658 | -     | -      | -              | -    | -      | -     | -      | -       | -    | -      | 0.011 | 4.873  | 1.1E-06 | 57.1 | 17,148 | 0.011 | 4.873  | 1.1E-06 | 57.1 | 17,148 |
| rs712900    | LPPR4        | 1  | 99261313  | -                       | T | C | 0.014 | -0.006 | 0.001 | 3.4E-07 | 12,659 | 0.009 | -3.293 | 9.9E-04        | 93.8 | 21,504 | 0.055 | -2.096 | 3.6E-02 | 88.9 | 25,156 | 0.013 | -4.298 | 1.7E-05 | 66   | 20,339 | 0.036 | -1.375 | 1.7E-01 | 78   | 41,681 |
| rs115546449 | TMEM63A      | 1  | 225882871 | -                       | A | G | 0.026 | -0.004 | 0.001 | 3.0E-07 | 12,659 | 0.017 | -3.951 | 7.8E-05        | 90.6 | 21,503 | 0.074 | -3.937 | 8.3E-05 | 73.9 | 25,156 | 0.024 | -3.700 | 2.2E-04 | 67.5 | 22,450 | 0.048 | -2.891 | 3.8E-03 | 59.2 | 43,791 |
| rs145815581 | ANO10        | 3  | 43466242  | -                       | A | G | 0.007 | -0.008 | 0.002 | 1.8E-07 | 12,659 | -     | -      | -              | -    | -      | 0.024 | -3.273 | 1.1E-03 | 84.9 | 25,156 | 0.006 | -4.157 | 3.2E-05 | 71.1 | 20,339 | 0.020 | -2.892 | 3.8E-03 | 73.5 | 32,836 |
| rs72886347  | FHIT         | 3  | 60196461  | -                       | T | C | 0.993 | 0.008  | 0.002 | 7.2E-07 | 12,659 | -     | -      | -              | -    | -      | 0.979 | 2.381  | 1.7E-02 | 89.8 | 25,156 | 0.993 | 3.221  | 1.3E-03 | 83.4 | 20,339 | 0.982 | 1.542  | 1.2E-01 | 83.6 | 32,836 |
| rs17136358  | EIF2AK1      | 7  | 6040031   | -                       | T | C | 0.963 | -0.003 | 0.001 | 2.8E-07 | 12,659 | 0.953 | -4.768 | 1.9E-06        | 81.2 | 21,503 | 0.953 | -3.446 | 5.7E-04 | 80.6 | 25,156 | 0.964 | -3.738 | 1.9E-04 | 57   | 25,001 | 0.954 | -3.163 | 1.6E-03 | 53.1 | 46,342 |
| rs117683919 | LOC105375440 | 7  | 106634111 | -                       | A | G | 0.006 | -0.009 | 0.002 | 1.4E-07 | 12,659 | 0.008 | -4.053 | 5.1E-05        | 91.1 | 21,503 | 0.005 | -4.957 | 7.2E-07 | 53.1 | 17,133 | 0.007 | -2.750 | 6.0E-03 | 77.1 | 23,530 | 0.008 | -2.508 | 1.2E-02 | 69.8 | 36,848 |
| rs143542634 | PATL1        | 11 | 59666070  | -                       | A | G | 0.006 | 0.009  | 0.002 | 4.3E-07 | 12,659 | 0.007 | 4.622  | 3.8E-06        | 82   | 21,504 | 0.005 | 4.873  | 1.1E-06 | 37.4 | 17,133 | 0.007 | 4.610  | 4.0E-06 | 54.7 | 16,200 | 0.007 | 4.450  | 8.6E-06 | 41.7 | 29,519 |

†African American (AA) replication samples included : Atherosclerosis Risk in Communities(ARIC), Multi-Ethnic Study of Atherosclerosis(MESA), Women's Health Initiative(WHI)

‡Hispanic Latino (HL) replication samples included : Genetics of Latinos Diabetic Retinopathy(GOLDR), Hispanic Community Health Study / Study of Latinos(HCHS/SOL), Mexican–American Hypertension Study(HTN), Mexican-American Coronary Artery Disease(MACAD), Multi-Ethnic Study of Atherosclerosis(MESA), Mexico-City, 1982 Pelotas Birth Cohort(PELOTAS), Starr County Health Studies(STARR), Women's Health Initiative(WHI).

¥European American (EA) replication samples included : Atherosclerosis Risk in Communities(ARIC)

**Supplementary Table 5.** Summary of association results in SOL subgroup analyses for suggestively significant loci ( $P < 1E-6$ ) associated with WHRadjBMI. EAF-estimated allele frequency, CHR- chromosome, POS- position (build GRCh38), SE- standard error, ISQ- I squared heterogeneity. EAF for reference population obtained from 1000 Genomes Project Phase 3.

| dbSNPID         | Nearest Gene      | CHR | POS       | Effect Allele | Other Allele | Combined |       |        |       |                | Caribbean |       |        |       |         | Mainland |       |        |       |                | ISQ   | P <sub>diff</sub> | EAF   |       |       |
|-----------------|-------------------|-----|-----------|---------------|--------------|----------|-------|--------|-------|----------------|-----------|-------|--------|-------|---------|----------|-------|--------|-------|----------------|-------|-------------------|-------|-------|-------|
|                 |                   |     |           |               |              | N        | EAF   | BETA   | SE    | P              | N         | EAF   | BETA   | SE    | P       | N        | EAF   | BETA   | SE    | P              |       |                   | AFR   | EUR   | AMR   |
| <b>MEN</b>      |                   |     |           |               |              |          |       |        |       |                |           |       |        |       |         |          |       |        |       |                |       |                   |       |       |       |
| rs12032174      | <i>RYR2</i>       | 1   | 237692868 | C             | T            | 5,200    | 0.352 | -0.005 | 0.001 | 4.5E-07        | 2,395     | 0.353 | -0.005 | 0.002 | 5.9E-04 | 2,793    | 0.352 | -0.005 | 0.001 | 4.5E-04        | 64.72 | 3.8E-01           | 0.401 | 0.383 | 0.370 |
| rs10475310      | <i>PLEKHG4B</i>   | 5   | 23024     | C             | G            | 5,200    | 0.748 | -0.006 | 0.001 | <b>2.0E-08</b> | 2,395     | 0.747 | -0.006 | 0.002 | 1.8E-04 | 2,793    | 0.748 | -0.006 | 0.002 | 4.9E-05        | 0     | 3.9E-01           | 0.781 | 0.751 | 0.733 |
| rs16977373      | <i>RIT2</i>       | 18  | 43189620  | A             | C            | 5,200    | 0.962 | -0.013 | 0.003 | 6.6E-07        | 2,395     | 0.939 | -0.015 | 0.003 | 9.7E-06 | 2,793    | 0.981 | -0.010 | 0.005 | 3.9E-02        | 83.56 | 2.7E-01           | 0.752 | 0.997 | 0.984 |
| rs721424        | <i>CFAP61</i>     | 20  | 20358666  | G             | T            | 5,200    | 0.516 | 0.005  | 0.001 | 8.2E-07        | 2,395     | 0.520 | 0.005  | 0.002 | 2.4E-03 | 2,793    | 0.513 | 0.005  | 0.001 | 2.3E-04        | 0     | 4.0E-01           | 0.816 | 0.421 | 0.548 |
| rs148213302     | <i>STS</i>        | X   | 7416464   | T             | C            | 5,189    | 0.995 | 0.025  | 0.005 | 3.7E-07        | 2,391     | 0.992 | 0.030  | 0.006 | 6.5E-07 | 2,786    | 0.997 | 0.009  | 0.009 | 3.0E-01        | 0     | 5.5E-02           | 0.981 | 1.000 | 1.000 |
| <b>WOMEN</b>    |                   |     |           |               |              |          |       |        |       |                |           |       |        |       |         |          |       |        |       |                |       |                   |       |       |       |
| rs77377042      | <i>MARCKSL1</i>   | 1   | 32343334  | C             | T            | 7,472    | 0.976 | -0.018 | 0.004 | 8.0E-07        | 3,238     | 0.961 | -0.021 | 0.005 | 3.7E-06 | 4,220    | 0.987 | -0.011 | 0.006 | 8.2E-02        | 81.79 | 1.7E-01           | 0.831 | 1.000 | 0.988 |
| rs75120960      | <i>EPHA5</i>      | 4   | 66367753  | A             | G            | 7,472    | 0.980 | -0.020 | 0.004 | 1.9E-07        | 3,238     | 0.966 | -0.018 | 0.005 | 1.6E-04 | 4,220    | 0.991 | -0.027 | 0.008 | 3.9E-04        | 0     | 2.5E-01           | 0.860 | 1.000 | 0.987 |
| rs16922424      | <i>FAM110B</i>    | 8   | 57618850  | T             | C            | 7,471    | 0.982 | 0.021  | 0.004 | 4.9E-07        | 3,237     | 0.969 | 0.017  | 0.005 | 1.1E-03 | 4,220    | 0.992 | 0.034  | 0.008 | 2.6E-05        | 24.99 | 8.8E-02           | 0.868 | 1.000 | 0.987 |
| rs79478137      | <i>SLC22A18AS</i> | 11  | 2891739   | C             | T            | 7,472    | 0.985 | 0.023  | 0.004 | 2.0E-07        | 3,238     | 0.975 | 0.025  | 0.006 | 8.9E-06 | 4,220    | 0.992 | 0.024  | 0.008 | 2.7E-03        | 0     | 4.0E-01           | 0.905 | 0.989 | 0.986 |
| rs113818604     | <i>NTM</i>        | 11  | 131960980 | G             | A            | 7,471    | 0.987 | 0.027  | 0.005 | <b>5.5E-08</b> | 3,238     | 0.987 | 0.014  | 0.008 | 8.1E-02 | 4,219    | 0.986 | 0.034  | 0.006 | <b>1.6E-08</b> | 78.48 | 6.1E-02           | 0.998 | 0.977 | 0.991 |
| rs115981023     | <i>TAOK3</i>      | 12  | 118313300 | G             | A            | 7,472    | 0.991 | -0.029 | 0.006 | 8.9E-07        | 3,238     | 0.984 | -0.030 | 0.007 | 2.7E-05 | 4,220    | 0.997 | -0.027 | 0.012 | 2.5E-02        | 0     | 3.9E-01           | 0.937 | 0.998 | 0.999 |
| rs146900844     | <i>ZNF207</i>     | 17  | 32378136  | G             | A            | 7,472    | 0.995 | 0.041  | 0.008 | 6.3E-07        | 3,238     | 0.993 | 0.042  | 0.012 | 3.7E-04 | 4,220    | 0.996 | 0.040  | 0.012 | 6.6E-04        | 39.45 | 4.0E-01           | 1.000 | 0.994 | 0.996 |
| rs61305557      | <i>C19orf67</i>   | 19  | 14081134  | G             | A            | 7,472    | 0.971 | 0.018  | 0.004 | 4.8E-07        | 3,238     | 0.946 | 0.021  | 0.004 | 1.2E-06 | 4,220    | 0.990 | 0.005  | 0.008 | 4.8E-01        | 72.14 | 8.6E-02           | 0.818 | 0.999 | 0.978 |
| <b>COMBINED</b> |                   |     |           |               |              |          |       |        |       |                |           |       |        |       |         |          |       |        |       |                |       |                   |       |       |       |
| rs13301996      | <i>CDK5RAP2</i>   | 9   | 120570806 | T             | G            | 12,672   | 0.808 | 0.005  | 0.001 | 5.7E-07        | 5,633     | 0.789 | 0.006  | 0.002 | 2.5E-04 | 7,013    | 0.822 | 0.003  | 0.001 | 2.0E-02        | 37.02 | 1.8E-01           | 0.886 | 0.809 | 0.794 |
| rs115981023     | <i>TAOK3</i>      | 12  | 118313300 | G             | A            | 12,672   | 0.992 | -0.023 | 0.004 | 2.1E-07        | 5,633     | 0.985 | -0.019 | 0.006 | 8.9E-04 | 7,013    | 0.997 | -0.030 | 0.010 | 2.6E-03        | 0     | 2.6E-01           | 0.937 | 0.998 | 0.999 |
| rs185566196     | <i>KIAA0391</i>   | 14  | 35152593  | C             | T            | 12,672   | 0.989 | -0.019 | 0.004 | 2.6E-07        | 5,633     | 0.979 | -0.025 | 0.005 | 5.3E-07 | 7,013    | 0.996 | -0.019 | 0.009 | 3.6E-02        | 0     | 3.5E-01           | 0.956 | 0.993 | 0.996 |
| rs116612483     | <i>CDH4</i>       | 20  | 60751325  | G             | A            | 12,672   | 0.994 | -0.027 | 0.005 | 6.0E-07        | 5,633     | 0.989 | -0.025 | 0.007 | 2.6E-04 | 7,013    | 0.998 | -0.011 | 0.016 | 5.0E-01        | 0     | 2.9E-01           | 0.950 | 1.000 | 0.999 |

**Supplementary Table 6.** Summary of association results in SOL subgroup analyses for suggestively significant loci ( $P < 1E-6$ ) associated with WCadjBMI. EAF-estimated allele frequency, CHR- chromosome, POS- position (build GRCh38), SE- standard error, ISQ- I squared heterogeneity. EAF for reference population obtained from 1000 Genomes Project Phase 3.

| dbSNPID      | Nearest Gene | CHR | POS       | Effect Allele | Other Allele | Combined |       |        |       |                | Caribbean |       |        |       |         | Mainland |       |        |       |         | ISQ   | P <sub>diff</sub> | EAF   |       |       |
|--------------|--------------|-----|-----------|---------------|--------------|----------|-------|--------|-------|----------------|-----------|-------|--------|-------|---------|----------|-------|--------|-------|---------|-------|-------------------|-------|-------|-------|
|              |              |     |           |               |              | N        | EAF   | BETA   | SE    | PVAL           | N         | EAF   | BETA   | SE    | PVAL    | N        | EAF   | BETA   | SE    | PVAL    |       |                   | AFR   | EUR   | AMR   |
| <b>MEN</b>   |              |     |           |               |              |          |       |        |       |                |           |       |        |       |         |          |       |        |       |         |       |                   |       |       |       |
| rs74346221   | GABRD        | 1   | 2029024   | T             | G            | 5,202    | 0.019 | -2.023 | 0.41  | 8.1E-07        | 2,397     | 0.031 | -1.811 | 0.490 | 2.2E-04 | 2,793    | 0.009 | -2.565 | 0.779 | 9.9E-04 | 0     | 2.9E-01           | 0.121 | 0.000 | 0.009 |
| rs72693785   | ATP1A1       | 1   | 116334965 | T             | C            | 5,203    | 0.006 | -4.088 | 0.734 | <b>2.5E-08</b> | 2,398     | 0.009 | -4.557 | 0.858 | 1.1E-07 | 2,793    | 0.003 | -3.336 | 1.516 | 2.8E-02 | 0     | 3.1E-01           | 0.002 | 0.009 | 0.001 |
| rs11583298   | ESRRG        | 1   | 217171261 | T             | C            | 5,203    | 0.822 | -0.711 | 0.14  | 4.0E-07        | 2,398     | 0.910 | -0.644 | 0.270 | 1.7E-02 | 2,793    | 0.747 | -0.711 | 0.161 | 1.0E-05 | 0     | 3.9E-01           | 0.998 | 0.920 | 0.790 |
| rs76842062   | MAP4K4       | 2   | 101847192 | T             | G            | 5,203    | 0.995 | 3.799  | 0.72  | 1.3E-07        | 2,398     | 0.990 | 3.052  | 0.805 | 1.5E-04 | 2,793    | 0.998 | 6.881  | 1.688 | 4.6E-05 | 0     | <b>4.9E-02</b>    | 0.962 | 0.999 | 0.996 |
| rs141365360  | LOC102723448 | 3   | 21826     | A             | G            | 5,203    | 0.007 | 3.154  | 0.629 | 5.3E-07        | 2,398     | 0.011 | 3.437  | 0.756 | 5.6E-06 | 2,793    | 0.004 | 2.159  | 1.153 | 6.1E-02 | 0     | 2.6E-01           | 0.056 | 0.000 | 0.004 |
| rs6809759    | PROK2        | 3   | 71937742  | A             | G            | 5,203    | 0.497 | -0.586 | 0.102 | <b>9.4E-09</b> | 2,398     | 0.514 | -0.461 | 0.155 | 2.9E-03 | 2,793    | 0.482 | -0.673 | 0.135 | 6.5E-07 | 0     | 2.3E-01           | 0.358 | 0.601 | 0.504 |
| rs76941364   | COBL         | 7   | 52064843  | A             | G            | 5,203    | 0.989 | 2.443  | 0.498 | 9.4E-07        | 2,398     | 0.983 | 1.753  | 0.597 | 3.3E-03 | 2,793    | 0.995 | 4.303  | 0.922 | 3.0E-06 | 0     | <b>2.7E-02</b>    | 0.950 | 0.999 | 0.994 |
| rs139139519  | SULF1        | 8   | 69625608  | A             | G            | 5,203    | 0.012 | -2.365 | 0.458 | 2.4E-07        | 2,398     | 0.018 | -2.668 | 0.573 | 3.2E-06 | 2,793    | 0.008 | -1.747 | 0.775 | 2.4E-02 | 0     | 2.5E-01           | 0.018 | 0.011 | 0.009 |
| rs35569658   | RBFOX1       | 16  | 5754433   | C             | G            | 5,203    | 0.313 | -0.562 | 0.112 | 5.3E-07        | 2,398     | 0.250 | -0.560 | 0.180 | 1.8E-03 | 2,793    | 0.367 | -0.536 | 0.142 | 1.6E-04 | 0     | 4.0E-01           | 0.138 | 0.249 | 0.353 |
| rs148280037  | SHISA9       | 16  | 12886370  | T             | C            | 5,203    | 0.984 | 2.081  | 0.412 | 4.5E-07        | 2,398     | 0.978 | 2.358  | 0.527 | 7.5E-06 | 2,793    | 0.989 | 1.638  | 0.674 | 1.5E-02 | 0     | 2.8E-01           | 0.979 | 0.987 | 0.994 |
| rs143565319  | PIK3C3       | 18  | 40962346  | T             | C            | 5,203    | 0.989 | 2.669  | 0.497 | 7.8E-08        | 2,398     | 0.983 | 2.656  | 0.583 | 5.3E-06 | 2,793    | 0.995 | 2.111  | 1.001 | 3.5E-02 | 0     | 3.6E-01           | 0.925 | 1.000 | 0.996 |
| <b>WOMEN</b> |              |     |           |               |              |          |       |        |       |                |           |       |        |       |         |          |       |        |       |         |       |                   |       |       |       |
| rs112469617  | FZD7         | 2   | 201982887 | T             | C            | 7,471    | 0.009 | -2.977 | 0.594 | 5.5E-07        | 3,237     | 0.014 | -3.047 | 0.744 | 4.3E-05 | 4,220    | 0.006 | -2.895 | 0.984 | 3.3E-03 | 0     | 4.0E-01           | 0.064 | 0.000 | 0.007 |
| rs17385466   | SOX5         | 12  | 23639004  | T             | C            | 7,471    | 0.923 | 1.089  | 0.209 | 1.8E-07        | 3,237     | 0.899 | 1.286  | 0.283 | 5.6E-06 | 4,220    | 0.941 | 0.869  | 0.308 | 4.8E-03 | 0     | 2.4E-01           | 0.995 | 0.886 | 0.916 |
| <b>ALL</b>   |              |     |           |               |              |          |       |        |       |                |           |       |        |       |         |          |       |        |       |         |       |                   |       |       |       |
| rs77993329   | ACTRT2       | 1   | 3001535   | A             | G            | 12,673   | 0.02  | -1.457 | 0.288 | 4.1E-07        | 5,634     | 0.031 | -1.610 | 0.371 | 1.4E-05 | 7,013    | 0.011 | -1.523 | 0.528 | 3.9E-03 | 0     | 4.0E-01           | 0.091 | 0.000 | 0.019 |
| rs138819965  | LINC00299    | 2   | 8304328   | A             | G            | 12,674   | 0.994 | 2.706  | 0.525 | 2.5E-07        | 5,635     | 0.989 | 2.781  | 0.624 | 8.2E-06 | 7,013    | 0.998 | 1.670  | 1.230 | 1.7E-01 | 0     | 2.9E-01           | 0.953 | 1.000 | 0.999 |
| rs77319470   | ADAMTS3      | 4   | 72638360  | T             | G            | 12,674   | 0.371 | 0.406  | 0.082 | 8.6E-07        | 5,635     | 0.409 | 0.434  | 0.130 | 8.3E-04 | 7,013    | 0.341 | 0.329  | 0.115 | 4.1E-03 | 0     | 3.3E-01           | 0.580 | 0.391 | 0.359 |
| rs921999     | FGF5         | 4   | 80296998  | A             | C            | 12,674   | 0.965 | -1.104 | 0.222 | 6.7E-07        | 5,635     | 0.939 | -0.850 | 0.275 | 2.0E-03 | 7,013    | 0.986 | -1.160 | 0.456 | 1.1E-02 | 0     | 3.4E-01           | 0.791 | 1.000 | 0.980 |
| rs112404395  | AP3B1        | 5   | 77964563  | C             | G            | 12,674   | 0.991 | -2.22  | 0.412 | 7.1E-08        | 5,635     | 0.989 | -2.344 | 0.602 | 9.9E-05 | 7,013    | 0.992 | -2.164 | 0.627 | 5.6E-04 | 0     | 3.9E-01           | 0.999 | 0.979 | 0.993 |
| rs77264633   | CCDC171      | 9   | 15823920  | A             | G            | 12,674   | 0.962 | -1.118 | 0.205 | <b>4.6E-08</b> | 5,635     | 0.955 | -1.132 | 0.302 | 1.8E-04 | 7,013    | 0.967 | -1.242 | 0.304 | 4.4E-05 | 0     | 3.9E-01           | 0.995 | 0.931 | 0.963 |
| rs184067184  | PHF21A       | 11  | 46189280  | A             | C            | 12,674   | 0.006 | -3.612 | 0.702 | 2.7E-07        | 5,635     | 0.008 | -3.988 | 0.833 | 1.7E-06 | 7,013    | 0.004 | -2.871 | 1.720 | 9.5E-02 | 0     | 3.4E-01           | 0.000 | 0.000 | 0.004 |
| rs3168072    | FADS2        | 11  | 61864038  | A             | T            | 12,674   | 0.725 | 0.514  | 0.102 | 5.3E-07        | 5,635     | 0.885 | 0.417  | 0.207 | 4.4E-02 | 7,013    | 0.597 | 0.455  | 0.120 | 1.6E-04 | 0     | 3.9E-01           | 0.990 | 0.967 | 0.627 |
| rs60260780   | WSB2         | 12  | 118041899 | T             | C            | 12,674   | 0.013 | 1.78   | 0.35  | 3.7E-07        | 5,635     | 0.023 | 2.070  | 0.427 | 1.2E-06 | 7,013    | 0.005 | 0.620  | 0.759 | 4.1E-01 | 63.92 | 1.0E-01           | 0.117 | 0.001 | 0.006 |

**Supplementary Table 7.** Summary of association results in SOL subgroup analyses for suggestively significant loci ( $P < 1E-6$ ) associated with HIPadjBMI. EAF-estimated allele frequency, CHR- chromosome, POS- position (build GRCh38), SE- standard error, ISQ- I squared heterogeneity. EAF for reference population obtained from 1000 Genomes Project Phase 3.

| dbSNPID      | Nearest Gene        | CHR | POS       | Effect Allele | Other Allele | Combined |       |        |       |         | Caribbean |       |        |       |                | Mainland |       |        |       |         | ISQ   | P <sub>diff</sub> | EAF   |       |       |
|--------------|---------------------|-----|-----------|---------------|--------------|----------|-------|--------|-------|---------|-----------|-------|--------|-------|----------------|----------|-------|--------|-------|---------|-------|-------------------|-------|-------|-------|
|              |                     |     |           |               |              | N        | EAF   | BETA   | SE    | PVAL    | N         | EAF   | BETA   | SE    | PVAL           | N        | EAF   | BETA   | SE    | PVAL    |       |                   | AFR   | EUR   | AMR   |
| <b>MEN</b>   |                     |     |           |               |              |          |       |        |       |         |           |       |        |       |                |          |       |        |       |         |       |                   |       |       |       |
| rs114865909  | <i>NUF2</i>         | 1   | 163589134 | T             | C            | 5,197    | 0.994 | -0.012 | 0.002 | 8.6E-07 | 2,394     | 0.989 | -0.012 | 0.003 | 1.5E-05        | 2,791    | 0.998 | -0.010 | 0.006 | 9.8E-02 | 7.27  | 3.7E-01           | 0.950 | 0.999 | 0.999 |
| rs149681500  | <i>ANO10</i>        | 3   | 43396572  | T             | C            | 5,197    | 0.007 | -0.012 | 0.002 | 5.3E-08 | 2,394     | 0.013 | -0.014 | 0.003 | 9.6E-08        | 2,791    | 0.002 | -0.002 | 0.005 | 7.7E-01 | 80.06 | <b>4.4E-02</b>    | 0.051 | 0.000 | 0.004 |
| rs3915213    | <i>LOC101927346</i> | 3   | 74024720  | T             | C            | 5,197    | 0.779 | -0.002 | 0.000 | 5.6E-07 | 2,394     | 0.712 | -0.002 | 0.001 | 2.0E-04        | 2,791    | 0.836 | -0.002 | 0.001 | 1.5E-03 | 0.00  | 3.8E-01           | 0.665 | 0.698 | 0.831 |
| rs12677587   | <i>LOC101929066</i> | 8   | 18118812  | C             | G            | 5,197    | 0.012 | -0.009 | 0.002 | 9.6E-07 | 2,394     | 0.020 | -0.009 | 0.002 | 2.7E-05        | 2,791    | 0.005 | -0.008 | 0.004 | 3.2E-02 | 0.00  | 3.7E-01           | 0.058 | 0.002 | 0.010 |
| rs56405004   | <i>MINPP1</i>       | 10  | 87512407  | T             | C            | 5,197    | 0.018 | 0.008  | 0.001 | 1.7E-07 | 2,394     | 0.027 | 0.007  | 0.002 | 5.1E-05        | 2,791    | 0.010 | 0.008  | 0.002 | 7.5E-04 | 0.00  | 3.9E-01           | 0.108 | 0.002 | 0.010 |
| rs968849     | <i>LOC102724589</i> | 10  | 114997972 | A             | G            | 5,197    | 0.195 | -0.002 | 0.000 | 8.2E-07 | 2,394     | 0.237 | -0.002 | 0.001 | 1.2E-03        | 2,791    | 0.158 | -0.002 | 0.001 | 4.0E-04 | 0.00  | 3.9E-01           | 0.161 | 0.313 | 0.154 |
| rs76469489   | <i>SLC7A10</i>      | 19  | 33249049  | C             | G            | 5,197    | 0.013 | -0.009 | 0.002 | 9.6E-07 | 2,394     | 0.015 | -0.009 | 0.002 | 2.7E-04        | 2,791    | 0.010 | -0.008 | 0.003 | 1.5E-03 | 0.00  | 3.9E-01           | 0.002 | 0.035 | 0.016 |
| rs7063750    | <i>VCX</i>          | X   | 7724974   | T             | G            | 5,186    | 0.039 | 0.004  | 0.001 | 2.7E-07 | 2,390     | 0.068 | 0.004  | 0.001 | 2.1E-05        | 2,784    | 0.014 | 0.004  | 0.002 | 4.6E-03 | 0.00  | 3.7E-01           | 0.628 | 0.086 | 0.120 |
| rs112519383  | <i>MID1</i>         | X   | 10446834  | A             | G            | 5,186    | 0.988 | -0.007 | 0.001 | 7.4E-08 | 2,390     | 0.980 | -0.007 | 0.001 | 2.5E-06        | 2,784    | 0.995 | -0.006 | 0.003 | 3.0E-02 | 0.00  | 3.5E-01           | 0.883 | 0.999 | 0.990 |
| <b>WOMEN</b> |                     |     |           |               |              |          |       |        |       |         |           |       |        |       |                |          |       |        |       |         |       |                   |       |       |       |
| rs72978809   | <i>LPPR4</i>        | 1   | 99260939  | A             | G            | 7,462    | 0.994 | 0.011  | 0.002 | 4.4E-07 | 3,232     | 0.990 | 0.012  | 0.003 | 1.4E-05        | 4,216    | 0.997 | 0.010  | 0.004 | 1.5E-02 | 0.00  | 3.8E-01           | 0.956 | 1.000 | 0.996 |
| rs12478843   | <i>HEATR5B</i>      | 2   | 37080089  | A             | G            | 7,462    | 0.248 | -0.002 | 0.000 | 8.2E-08 | 3,232     | 0.154 | -0.002 | 0.001 | 6.0E-03        | 4,216    | 0.320 | -0.002 | 0.000 | 6.5E-06 | 1.68  | 3.9E-01           | 0.023 | 0.137 | 0.268 |
| rs115331260  | <i>LOC105376941</i> | 3   | 5864170   | A             | G            | 7,462    | 0.985 | 0.008  | 0.002 | 8.8E-07 | 3,232     | 0.982 | 0.009  | 0.002 | 4.0E-05        | 4,216    | 0.987 | 0.005  | 0.002 | 1.9E-02 | 0.00  | 1.9E-01           | 0.003 | 0.037 | 0.004 |
| rs7662640    | <i>LOC105374566</i> | 4   | 31765535  | T             | C            | 7,462    | 0.012 | 0.008  | 0.002 | 6.3E-07 | 3,232     | 0.012 | 0.009  | 0.003 | 5.8E-04        | 4,216    | 0.012 | 0.007  | 0.002 | 4.4E-04 | 0.00  | 3.7E-01           | 0.011 | 0.024 | 0.012 |
| rs6814739    | <i>LINC01094</i>    | 4   | 78654647  | T             | C            | 7,462    | 0.569 | -0.002 | 0.000 | 7.2E-07 | 3,232     | 0.594 | -0.002 | 0.001 | 2.8E-04        | 4,216    | 0.550 | -0.002 | 0.000 | 1.7E-04 | 0.00  | 3.5E-01           | 0.154 | 0.766 | 0.566 |
| rs11099588   | <i>COQ2</i>         | 4   | 83280326  | T             | C            | 7,462    | 0.057 | 0.004  | 0.001 | 2.4E-07 | 3,232     | 0.090 | 0.005  | 0.001 | 1.9E-06        | 4,216    | 0.032 | 0.003  | 0.001 | 3.8E-02 | 64.14 | 2.0E-01           | 0.281 | 0.033 | 0.036 |
| rs6860625    | <i>NREP</i>         | 5   | 111667124 | A             | G            | 7,462    | 0.813 | -0.002 | 0.000 | 6.4E-07 | 3,232     | 0.789 | -0.004 | 0.001 | 1.3E-07        | 4,216    | 0.831 | -0.001 | 0.001 | 6.4E-02 | 28.03 | <b>9.5E-03</b>    | 0.593 | 0.869 | 0.839 |
| rs77186623   | <i>LOC105375745</i> | 8   | 125608952 | A             | C            | 7,461    | 0.022 | -0.006 | 0.001 | 1.7E-07 | 3,231     | 0.041 | -0.008 | 0.001 | <b>3.1E-08</b> | 4,216    | 0.008 | -0.001 | 0.003 | 5.7E-01 | 55.31 | <b>4.2E-02</b>    | 0.115 | 0.000 | 0.017 |
| rs10818474   | <i>MEGF9</i>        | 9   | 120727686 | T             | C            | 7,462    | 0.809 | -0.002 | 0.000 | 5.1E-07 | 3,232     | 0.743 | -0.002 | 0.001 | 3.1E-03        | 4,216    | 0.860 | -0.003 | 0.001 | 4.2E-06 | 0.00  | 1.6E-01           | 0.548 | 0.764 | 0.817 |
| rs28692724*  | <i>IRF2BPL</i>      | 14  | 77027445  | T             | C            | 7,462    | 0.425 | 0.002  | 0.000 | 7.3E-07 | 3,232     | 0.377 | 0.002  | 0.001 | 4.0E-05        | 4,216    | 0.462 | 0.002  | 0.001 | 8.7E-04 | 0.00  | 2.3E-01           | 0.160 | 0.384 | 0.310 |
| rs6092086    | <i>LOC105372676</i> | 20  | 55193568  | A             | G            | 7,462    | 0.922 | -0.003 | 0.001 | 3.4E-07 | 3,232     | 0.871 | -0.003 | 0.001 | 4.0E-05        | 4,216    | 0.962 | -0.003 | 0.001 | 6.4E-03 | 0.00  | 4.0E-01           | 0.562 | 0.989 | 0.944 |
| rs9631175    | <i>TAF4</i>         | 20  | 62072648  | A             | C            | 7,462    | 0.793 | 0.002  | 0.000 | 6.0E-08 | 3,232     | 0.834 | 0.002  | 0.001 | 1.3E-02        | 4,216    | 0.762 | 0.003  | 0.001 | 2.1E-06 | 38.00 | 2.8E-01           | 0.701 | 0.888 | 0.785 |
| <b>ALL</b>   |                     |     |           |               |              |          |       |        |       |         |           |       |        |       |                |          |       |        |       |         |       |                   |       |       |       |
| rs144655586  | <i>CLSPN</i>        | 1   | 35725381  | T             | C            | 12,658   | 0.012 | 0.007  | 0.001 | 1.7E-07 | 5,625     | 0.012 | 0.010  | 0.002 | 9.1E-06        | 7,007    | 0.011 | 0.006  | 0.002 | 3.5E-03 | 49.55 | 1.5E-01           | 0.001 | 0.014 | 0.006 |
| rs712900     | <i>LPPR4</i>        | 1   | 99261313  | T             | C            | 12,659   | 0.014 | -0.006 | 0.001 | 3.4E-07 | 5,626     | 0.022 | -0.005 | 0.001 | 1.3E-04        | 7,007    | 0.007 | -0.006 | 0.002 | 3.2E-03 | 0.00  | 3.8E-01           | 0.098 | 0.001 | 0.007 |
| rs115546449  | <i>TMEM63A</i>      | 1   | 225882871 | A             | G            | 12,659   | 0.026 | -0.004 | 0.001 | 3.0E-07 | 5,626     | 0.047 | -0.004 | 0.001 | 1.4E-04        | 7,007    | 0.010 | -0.005 | 0.002 | 4.0E-03 | 0.00  | 3.2E-01           | 0.136 | 0.001 | 0.014 |
| rs145815581  | <i>ANO10</i>        | 3   | 43466242  | A             | G            | 12,659   | 0.007 | -0.008 | 0.002 | 1.8E-07 | 5,626     | 0.013 | -0.009 | 0.002 | 2.3E-07        | 7,007    | 0.003 | -0.002 | 0.003 | 5.9E-01 | 76.32 | <b>4.8E-02</b>    | 0.051 | 0.000 | 0.004 |
| rs72886347   | <i>FHIT</i>         | 3   | 60196461  | T             | C            | 12,659   | 0.993 | 0.008  | 0.002 | 7.2E-07 | 5,626     | 0.989 | 0.010  | 0.002 | 4.5E-07        | 7,007    | 0.997 | 0.006  | 0.003 | 6.0E-02 | 15.13 | 2.2E-01           | 0.940 | 1.000 | 0.994 |
| rs17136358   | <i>EIF2AK1</i>      | 7   | 6040031   | T             | C            | 12,659   | 0.963 | -0.003 | 0.001 | 2.8E-07 | 5,626     | 0.951 | -0.003 | 0.001 | 2.6E-03        | 7,007    | 0.972 | -0.004 | 0.001 | 4.9E-04 | 0.00  | 3.4E-01           | 0.958 | 0.953 | 0.967 |
| rs117683919  | <i>LOC105375440</i> | 7   | 106634111 | A             | G            | 12,659   | 0.006 | -0.009 | 0.002 | 1.4E-07 | 5,626     | 0.009 | -0.011 | 0.002 | 4.0E-07        | 7,007    | 0.004 | -0.007 | 0.003 | 1.5E-02 | 0.00  | 1.9E-01           | 0.005 | 0.014 | 0.003 |
| rs143542634  | <i>PATL1</i>        | 11  | 59666070  | A             | G            | 12,659   | 0.006 | 0.009  | 0.002 | 4.3E-07 | 5,626     | 0.006 | 0.011  | 0.003 | 6.7E-05        | 7,007    | 0.007 | 0.008  | 0.002 | 2.1E-04 | 0.00  | 2.9E-01           | 0.001 | 0.006 | 0.004 |

**Supplementary Table 8.** Local ancestry results for all suggestively significant loci across all traits.

| rsID        | Nearest Gene        | CHR | POS (GRCh38) | Sex   | Effect Allele | Other Allele | EAF     |                 |          |
|-------------|---------------------|-----|--------------|-------|---------------|--------------|---------|-----------------|----------|
|             |                     |     |              |       |               |              | African | Native American | European |
| <b>WHR</b>  |                     |     |              |       |               |              |         |                 |          |
| rs13301996  | <i>CDK5RAP2</i>     | 9   | 120570806    | All   | T             | G            | 0.9029  | 0.8890          | 0.7414   |
| rs115981023 | <i>TAOK3</i>        | 12  | 118313300    | All   | G             | A            | 0.9431  | 1.0000          | 0.9996   |
| rs185566196 | <i>KIAA0391</i>     | 14  | 35152593     | All   | NA            | NA           | NA      | NA              | NA       |
| rs116612483 | <i>CDH4</i>         | 20  | 60751325     | All   | G             | A            | 0.9631  | 1.0000          | 0.9999   |
| rs12032174  | <i>RYR2</i>         | 1   | 237692868    | Men   | C             | T            | 0.4060  | 0.3051          | 0.3693   |
| rs10475310  | <i>PLEKHG4B</i>     | 5   | 23024        | Men   | NA            | NA           | NA      | NA              | NA       |
| rs16977373  | <i>RIT2</i>         | 18  | 43189620     | Men   | A             | C            | 0.7718  | 1.0000          | 0.9911   |
| rs721424    | <i>CFAP61</i>       | 20  | 20358666     | Men   | G             | T            | 0.8124  | 0.5079          | 0.4454   |
| rs148213302 | <i>STS</i>          | 23  | 7416464      | Men   | NA            | NA           | NA      | NA              | NA       |
| rs77377042  | <i>MARCKSL1</i>     | 1   | 32343334     | Women | C             | T            | 0.8421  | 1.0000          | 0.9994   |
| rs75120960  | <i>EPHA5</i>        | 4   | 66367753     | Women | A             | G            | 0.8609  | 1.0000          | 0.9994   |
| rs16922424  | <i>FAM110B</i>      | 8   | 57618850     | Women | T             | C            | 0.8762  | 1.0000          | 0.9994   |
| rs79478137  | <i>SLC22A18AS</i>   | 11  | 2891739      | Women | C             | T            | 0.9232  | 0.9989          | 0.9946   |
| rs113818604 | <i>NTM</i>          | 11  | 131960980    | Women | G             | A            | 1.0000  | 1.0000          | 0.9809   |
| rs115981023 | <i>TAOK3</i>        | 12  | 118313300    | Women | G             | A            | 0.9431  | 1.0000          | 0.9996   |
| rs146900844 | <i>ZNF207</i>       | 17  | 32378136     | Women | G             | A            | 1.0000  | 1.0000          | 0.9942   |
| rs61305557  | <i>C19orf67</i>     | 19  | 14081134     | Women | NA            | NA           | NA      | NA              | NA       |
| <b>WC</b>   |                     |     |              |       |               |              |         |                 |          |
| rs77993329  | <i>ACTRT2</i>       | 1   | 3001535      | All   | G             | A            | 0.9126  | 0.9996          | 0.9904   |
| rs138819965 | <i>LINC00299</i>    | 2   | 8304328      | All   | A             | G            | 0.9598  | 1.0000          | 1.0000   |
| rs77319470  | <i>ADAMTS3</i>      | 4   | 72638360     | All   | G             | T            | 0.5050  | 0.7252          | 0.6110   |
| rs921999    | <i>FGF5</i>         | 4   | 80296998     | All   | A             | C            | 0.7737  | 0.9998          | 0.9941   |
| rs112404395 | <i>AP3B1</i>        | 5   | 77964563     | All   | C             | G            | 1.0000  | 1.0000          | 0.9835   |
| rs77264633  | <i>CCDC171</i>      | 9   | 15823920     | All   | A             | G            | 1.0000  | 0.9985          | 0.9318   |
| rs184067184 | <i>PHF21A</i>       | 11  | 46189280     | All   | C             | A            | 1.0000  | 0.9946          | 1.0000   |
| rs3168072   | <i>FADS2</i>        | 11  | 61864038     | All   | A             | T            | 0.9884  | 0.1949          | 0.9755   |
| rs60260780  | <i>WSB2</i>         | 12  | 118041899    | All   | C             | T            | 0.9112  | 0.9999          | 0.9998   |
| rs74346221  | <i>GABRD</i>        | 1   | 2029024      | Men   | NA            | NA           | NA      | NA              | NA       |
| rs72693785  | <i>ATP1A1</i>       | 1   | 116334965    | Men   | C             | T            | 1.0000  | 1.0000          | 0.9943   |
| rs11583298  | <i>ESRRG</i>        | 1   | 217171261    | Men   | T             | C            | 1.0000  | 0.5320          | 0.9309   |
| rs76842062  | <i>MAP4K4</i>       | 2   | 101847192    | Men   | T             | G            | 0.9775  | 1.0000          | 0.9997   |
| rs141365360 | <i>LOC102723448</i> | 3   | 21826        | Men   | G             | A            | 0.9512  | 0.9999          | 0.9996   |
| rs6809759   | <i>PROK2</i>        | 3   | 71937742     | Men   | G             | A            | 0.6679  | 0.6342          | 0.3908   |
| rs76941364  | <i>COBL</i>         | 7   | 52064843     | Men   | A             | G            | 0.9472  | 1.0000          | 0.9971   |
| rs139139519 | <i>SULF1</i>        | 8   | 69625608     | Men   | G             | A            | 0.9803  | 1.0000          | 0.9820   |
| rs35569658  | <i>RBFOX1</i>       | 16  | 5754433      | Men   | G             | C            | 0.8982  | 0.5073          | 0.7564   |
| rs148280037 | <i>SHISA9</i>       | 16  | 12886370     | Men   | T             | C            | 0.9780  | 0.9997          | 0.9825   |
| rs143565319 | <i>PIK3C3</i>       | 18  | 40962346     | Men   | T             | C            | 0.9216  | 1.0000          | 0.9998   |
| rs112469617 | <i>FZD7</i>         | 2   | 201982887    | Women | C             | T            | 0.9471  | 1.0000          | 1.0000   |
| rs17385466  | <i>SOX5</i>         | 12  | 23639004     | Women | T             | C            | 0.9990  | 0.9998          | 0.8576   |
| <b>HIP</b>  |                     |     |              |       |               |              |         |                 |          |
| rs144655586 | <i>CLSPN</i>        | 1   | 35725381     | All   | C             | T            | 0.9976  | 1.0000          | 0.9914   |
| rs712900    | <i>LPPR4</i>        | 1   | 99261313     | All   | C             | T            | 0.8977  | 1.0000          | 0.9998   |
| rs115546449 | <i>TMEM63A</i>      | 1   | 225882871    | All   | G             | A            | 0.8206  | 1.0000          | 0.9983   |
| rs145815581 | <i>ANO10</i>        | 3   | 43466242     | All   | G             | A            | 0.9531  | 1.0000          | 1.0000   |

|             |                     |    |           |       |    |    |        |        |        |
|-------------|---------------------|----|-----------|-------|----|----|--------|--------|--------|
| rs72886347  | <i>FHIT</i>         | 3  | 60184786  | All   | T  | C  | 0.9608 | 1.0000 | 0.9998 |
| rs17136358  | <i>EIF2AK1</i>      | 7  | 6040031   | All   | T  | C  | 0.9423 | 0.9995 | 0.9486 |
| rs117683919 | <i>LOC105375440</i> | 7  | 106634111 | All   | G  | A  | 0.9944 | 1.0000 | 0.9909 |
| rs143542634 | <i>PATL1</i>        | 11 | 59666070  | All   | G  | A  | 1.0000 | 1.0000 | 0.9905 |
| rs114865909 | <i>NUF2</i>         | 1  | 163589134 | Men   | T  | C  | 0.9550 | 1.0000 | 0.9996 |
| rs149681500 | <i>ANO10</i>        | 3  | 43396572  | Men   | C  | T  | 0.9518 | 1.0000 | 1.0000 |
| rs3915213   | <i>LOC101927346</i> | 3  | 74024720  | Men   | T  | C  | 0.6733 | 0.9898 | 0.6870 |
| rs12677587  | <i>LOC101929066</i> | 8  | 18118812  | Men   | G  | C  | 0.9245 | 0.9997 | 0.9972 |
| rs56405004  | <i>MINPP1</i>       | 10 | 87512407  | Men   | C  | T  | 0.8830 | 0.9997 | 0.9953 |
| rs968849    | <i>LOC102724589</i> | 10 | 114997972 | Men   | G  | A  | 0.8553 | 0.9888 | 0.6894 |
| rs76469489  | <i>SLC7A10</i>      | 19 | 33249049  | Men   | G  | C  | 1.0000 | 0.9991 | 0.9775 |
| rs7063750   | <i>VCX</i>          | 23 | 7724974   | Men   | NA | NA | NA     | NA     | NA     |
| rs112519383 | <i>MID1</i>         | 23 | 10446834  | Men   | NA | NA | NA     | NA     | NA     |
| rs72978809  | <i>LPPR4</i>        | 1  | 99260939  | Women | A  | G  | 0.9607 | 1.0000 | 0.9998 |
| rs12478843  | <i>HEATR5B</i>      | 2  | 37080089  | Women | G  | A  | 0.9869 | 0.4895 | 0.8482 |
| rs115331260 | <i>LOC105376941</i> | 3  | 5864170   | Women | A  | G  | 1.0000 | 1.0000 | 0.9843 |
| rs7662640   | <i>LOC105374566</i> | 4  | 31765535  | Women | C  | T  | 0.9930 | 0.9924 | 0.9864 |
| rs6814739   | <i>LINC01094</i>    | 4  | 78654647  | Women | C  | T  | 0.8707 | 0.6437 | 0.1988 |
| rs11099588  | <i>COQ2</i>         | 4  | 83280326  | Women | T  | C  | 0.2944 | 0.0006 | 0.0308 |
| rs6860625   | <i>NREP</i>         | 5  | 111667124 | Women | A  | G  | 0.5807 | 0.8582 | 0.8526 |
| rs77186623  | <i>LOC105375745</i> | 8  | 125608952 | Women | C  | A  | 0.8587 | 1.0000 | 0.9965 |
| rs10818474  | <i>MEGF9</i>        | 9  | 120727686 | Women | C  | T  | 0.4459 | 0.0034 | 0.2387 |
| rs28692724  | <i>IRF2BPL</i>      | 14 | 77027445  | Women | C  | T  | 0.8296 | 0.4506 | 0.6436 |
| rs6092086   | <i>LOC105372676</i> | 20 | 55193568  | Women | A  | G  | 0.5493 | 0.9995 | 0.9692 |
| rs9631175   | <i>TAF4</i>         | 20 | 62072648  | Women | A  | C  | 0.7289 | 0.6444 | 0.8909 |

Supplemental Table 9. Top variants for each generalized locus for waist-to-hip ratio adjusted for body mass index in SOL across known loci found in GIANT GWA

| dbSNPID      | Region              | Chr | Position<br>(build<br>GRCh38) | Effect<br>Allele | Other<br>Allele | GIANT estimates  |        |       |          | HCHS/SOL estimates |        |       |          | Meta-Analysis estimates   |        |       |          | Locus #   |
|--------------|---------------------|-----|-------------------------------|------------------|-----------------|------------------|--------|-------|----------|--------------------|--------|-------|----------|---------------------------|--------|-------|----------|-----------|
|              |                     |     |                               |                  |                 | Effect<br>Allele | Beta   | SE    | P-value  | Effect<br>Allele   | Beta   | SE    | P-value  | Generalization<br>r-value | Beta   | SE    | P-value  |           |
| <b>WOMEN</b> |                     |     |                               |                  |                 |                  |        |       |          |                    |        |       |          |                           |        |       |          |           |
| rs7543720    | <i>LOC101929147</i> | 1   | 119163343                     | A                | G               | 0.325            | -0.031 | 0.006 | 1.00E-07 | 0.239              | -0.077 | 0.019 | 5.98E-05 | 0.035                     | -0.035 | 0.006 | 3.48E-10 | <b>1</b>  |
| rs2605082    | <i>LOC102723886</i> | 1   | 219446196                     | G                | A               | 0.305            | 0.031  | 0.005 | 4.90E-11 | 0.291              | 0.081  | 0.018 | 5.97E-06 | 0.007                     | 0.034  | 0.005 | 5.08E-14 | <b>2</b>  |
| rs3769869    | <i>COBLL1</i>       | 2   | 164686689                     | A                | G               | 0.783            | 0.051  | 0.006 | 1.80E-20 | 0.769              | 0.072  | 0.019 | 1.71E-04 | 0.038                     | 0.053  | 0.005 | 2.56E-23 | <b>3</b>  |
| rs9311910    | <i>ADAMTS9-AS2</i>  | 3   | 64721593                      | G                | A               | 0.550            | 0.043  | 0.005 | 6.30E-21 | 0.417              | 0.051  | 0.017 | 2.42E-03 | 0.047                     | 0.044  | 0.004 | 9.49E-23 | <b>4</b>  |
| rs1294410    | <i>LOC101928004</i> | 6   | 6738519                       | C                | T               | 0.625            | 0.037  | 0.005 | 6.00E-16 | 0.529              | 0.052  | 0.017 | 1.66E-03 | 0.038                     | 0.038  | 0.004 | 8.58E-18 | <b>5</b>  |
| rs2800703    | <i>LOC105377989</i> | 6   | 127105653                     | G                | T               | 0.333            | 0.048  | 0.005 | 2.20E-22 | 0.419              | 0.054  | 0.017 | 1.36E-03 | 0.038                     | 0.048  | 0.005 | 6.99E-25 | <b>6</b>  |
| <b>ALL</b>   |                     |     |                               |                  |                 |                  |        |       |          |                    |        |       |          |                           |        |       |          |           |
| rs1106529    | <i>TBX15</i>        | 1   | 118988874                     | G                | A               | 0.275            | -0.035 | 0.004 | 1.80E-19 | 0.315              | -0.066 | 0.014 | 1.59E-06 | 0.002                     | -0.037 | 0.004 | 2.64E-23 | <b>1</b>  |
| rs2605095    | <i>LOC107985272</i> | 1   | 219468108                     | T                | A               | 0.317            | -0.039 | 0.005 | 8.00E-18 | 0.442              | -0.038 | 0.013 | 2.47E-03 | 0.027                     | -0.039 | 0.004 | 4.31E-20 | <b>2</b>  |
| rs40271      | <i>intergenic</i>   | 5   | 56500492                      | C                | T               | 0.225            | 0.022  | 0.004 | 3.80E-09 | 0.362              | 0.038  | 0.013 | 3.51E-03 | 0.034                     | 0.023  | 0.004 | 1.86E-10 | <b>7</b>  |
| rs1294410    | <i>LOC101928004</i> | 6   | 6738519                       | C                | T               | 0.625            | 0.032  | 0.004 | 7.70E-20 | 0.524              | 0.048  | 0.013 | 1.67E-04 | 0.010                     | 0.033  | 0.003 | 9.69E-23 | <b>5</b>  |
| rs7192       | <i>HLA-DRA</i>      | 6   | 32443869                      | G                | T               | 0.583            | 0.017  | 0.004 | 5.40E-07 | 0.670              | 0.038  | 0.013 | 4.62E-03 | 0.041                     | 0.018  | 0.003 | 6.04E-08 | <b>8</b>  |
| rs1358980    | <i>LOC105375070</i> | 6   | 43796814                      | T                | C               | 0.450            | 0.038  | 0.004 | 1.30E-26 | 0.480              | 0.049  | 0.013 | 8.84E-05 | 0.008                     | 0.039  | 0.003 | 1.15E-30 | <b>9</b>  |
| rs11766345   | <i>LAMB1</i>        | 7   | 107971205                     | G                | T               | 0.875            | 0.037  | 0.007 | 7.10E-07 | 0.871              | 0.056  | 0.019 | 3.05E-03 | 0.031                     | 0.040  | 0.007 | 9.64E-09 | <b>10</b> |
| rs894737     | <i>HOXC4</i>        | 12  | 54024359                      | C                | A               | 0.342            | 0.029  | 0.004 | 2.40E-11 | 0.323              | 0.048  | 0.013 | 3.44E-04 | 0.012                     | 0.031  | 0.004 | 1.62E-13 | <b>11</b> |
| rs4930723    | <i>CCDC92</i>       | 12  | 123939053                     | G                | C               | 0.617            | 0.030  | 0.005 | 1.70E-11 | 0.702              | 0.048  | 0.014 | 4.74E-04 | 0.015                     | 0.032  | 0.004 | 1.16E-13 | <b>12</b> |

Abbreviations: Chr, chromosome; SE, standard error



Supplemental Table 10. Top variants for each generalized locus for waist circumference adjusted for body mass index in SOL across known loci found in GIANT GWAS

| dbSNPID      | Region      | Chr | Position<br>(build<br>GRCh38) | Effect<br>Allele | Other<br>Allele | GIANT estimates            |        |       | HCHS/SOL estimates |                            |        |       | Meta-Analysis estimates |                            |        |       | Locus #  |         |
|--------------|-------------|-----|-------------------------------|------------------|-----------------|----------------------------|--------|-------|--------------------|----------------------------|--------|-------|-------------------------|----------------------------|--------|-------|----------|---------|
|              |             |     |                               |                  |                 | Effect Allele<br>Frequency | Beta   | SE    | P-value            | Effect Allele<br>Frequency | Beta   | SE    | P-value                 | Generalization r-<br>value | Beta   | SE    |          | P-value |
| <b>MEN</b>   |             |     |                               |                  |                 |                            |        |       |                    |                            |        |       |                         |                            |        |       |          |         |
| rs1409156    | TBX15       | 1   | 118750684                     | G                | A               | 0.342                      | 0.026  | 0.005 | 1.30E-07           | 0.325                      | 0.076  | 0.021 | 3.95E-04                | 0.034                      | 0.028  | 0.005 | 2.50E-09 | 1       |
| rs3791679    | EFEMP1      | 2   | 55723261                      | A                | G               | 0.725                      | 0.053  | 0.006 | 6.20E-22           | 0.796                      | 0.090  | 0.024 | 2.40E-04                | 0.034                      | 0.055  | 0.005 | 1.83E-24 | 2       |
| rs1147225    | NPR3        | 5   | 32823835                      | C                | T               | 0.642                      | 0.027  | 0.005 | 1.50E-08           | 0.576                      | 0.060  | 0.020 | 2.43E-03                | 0.050                      | 0.029  | 0.005 | 6.48E-10 | 3       |
| rs459193     | C5orf67     | 5   | 56546681                      | A                | G               | 0.217                      | 0.027  | 0.005 | 4.50E-07           | 0.277                      | 0.078  | 0.022 | 3.88E-04                | 0.034                      | 0.030  | 0.005 | 7.28E-09 | 4       |
| rs9358927    | LOC10192874 | 6   | 26438243                      | T                | G               | 0.583                      | 0.027  | 0.005 | 1.50E-08           | 0.591                      | 0.067  | 0.020 | 7.79E-04                | 0.034                      | 0.029  | 0.005 | 4.05E-10 | 5       |
| rs754133     | HOXC4       | 12  | 52311403                      | A                | G               | 0.333                      | 0.032  | 0.005 | 8.80E-11           | 0.326                      | 0.067  | 0.021 | 1.36E-03                | 0.037                      | 0.034  | 0.005 | 1.33E-12 | 6       |
| <b>WOMEN</b> |             |     |                               |                  |                 |                            |        |       |                    |                            |        |       |                         |                            |        |       |          |         |
| rs6691985    | CROCC       | 1   | 16963416                      | T                | C               | 0.225                      | -0.024 | 0.005 | 2.80E-07           | 0.339                      | -0.074 | 0.018 | 3.54E-05                | 0.025                      | -0.027 | 0.005 | 2.15E-09 | 7       |
| rs1106529    | TBX15       | 1   | 118790397                     | G                | A               | 0.275                      | -0.039 | 0.005 | 1.00E-14           | 0.312                      | -0.073 | 0.018 | 4.11E-05                | 0.025                      | -0.041 | 0.005 | 6.62E-18 | 1       |
| rs2605082    | LOC10272388 | 1   | 217512819                     | G                | A               | 0.305                      | 0.023  | 0.005 | 7.00E-07           | 0.292                      | 0.070  | 0.018 | 8.32E-05                | 0.027                      | 0.026  | 0.004 | 5.78E-09 | 8       |
| rs3769869    | COBLL1      | 2   | 164394935                     | A                | G               | 0.783                      | 0.035  | 0.005 | 2.90E-11           | 0.769                      | 0.063  | 0.019 | 9.55E-04                | 0.027                      | 0.037  | 0.005 | 4.34E-13 | 9       |
| rs10049090   | LINC02029   | 3   | 158562607                     | G                | A               | 0.600                      | 0.029  | 0.006 | 1.00E-07           | 0.531                      | 0.049  | 0.017 | 3.20E-03                | 0.027                      | 0.031  | 0.005 | 3.00E-09 | 10      |
| rs7705502    | CPEB4       | 5   | 173826418                     | A                | G               | 0.292                      | 0.029  | 0.005 | 4.40E-10           | 0.167                      | 0.064  | 0.022 | 3.46E-03                | 0.027                      | 0.030  | 0.005 | 1.29E-11 | 11      |
| rs10748827   | SUFU        | 10  | 102598569                     | G                | T               | 0.700                      | 0.022  | 0.004 | 5.80E-07           | 0.652                      | 0.050  | 0.017 | 3.55E-03                | 0.027                      | 0.024  | 0.004 | 2.57E-08 | 12      |
| rs11853983   | ADAMTSL3    | 15  | 81961473                      | A                | G               | 0.725                      | 0.031  | 0.006 | 2.30E-08           | 0.782                      | 0.064  | 0.020 | 1.28E-03                | 0.027                      | 0.033  | 0.005 | 5.60E-10 | 13      |
| rs757608     | Intergenic  | 17  | 58774698                      | A                | G               | 0.300                      | 0.026  | 0.005 | 1.40E-08           | 0.364                      | 0.060  | 0.017 | 4.20E-04                | 0.027                      | 0.028  | 0.004 | 1.83E-10 | 14      |
| <b>ALL</b>   |             |     |                               |                  |                 |                            |        |       |                    |                            |        |       |                         |                            |        |       |          |         |
| rs6691985    | CROCC       | 1   | 16963416                      | T                | C               | 0.225                      | -0.026 | 0.004 | 3.90E-13           | 0.337                      | -0.060 | 0.014 | 1.71E-05                | 0.008                      | -0.028 | 0.003 | 6.92E-16 | 7       |
| rs1106529    | TBX15       | 1   | 118790397                     | G                | A               | 0.275                      | -0.035 | 0.004 | 1.00E-20           | 0.315                      | -0.066 | 0.014 | 1.58E-06                | 0.002                      | -0.037 | 0.004 | 3.08E-24 | 1       |
| rs17369648   | Intergenic  | 2   | 55708944                      | C                | T               | 0.7                        | 0.029  | 0.005 | 4.20E-09           | 0.788                      | 0.048  | 0.016 | 1.97E-03                | 0.042                      | 0.031  | 0.005 | 4.91E-11 | 2       |
| rs10049090   | LINC02029   | 3   | 158562607                     | G                | A               | 0.6                        | 0.030  | 0.005 | 2.60E-11           | 0.532                      | 0.043  | 0.013 | 8.81E-04                | 0.033                      | 0.031  | 0.004 | 1.46E-13 | 10      |
| rs7697556    | Intergenic  | 4   | 72868460                      | C                | T               | 0.4917                     | -0.016 | 0.003 | 9.00E-07           | 0.557                      | -0.057 | 0.013 | 8.30E-06                | 0.026                      | -0.019 | 0.003 | 6.08E-09 | 15      |
| rs455660     | C5orf67     | 5   | 56556818                      | T                | C               | 0.1333                     | 0.024  | 0.004 | 3.70E-09           | 0.202                      | 0.049  | 0.016 | 2.46E-03                | 0.046                      | 0.026  | 0.004 | 3.07E-10 | 4       |
| rs754133     | HOXC4       | 12  | 52311403                      | A                | G               | 0.3333                     | 0.029  | 0.004 | 4.00E-17           | 0.322                      | 0.040  | 0.013 | 2.84E-03                | 0.048                      | 0.030  | 0.003 | 1.79E-18 | 6       |
| rs7214743    | Intergenic  | 17  | 58775473                      | A                | G               | 0.2917                     | 0.024  | 0.005 | 1.30E-07           | 0.363                      | 0.051  | 0.013 | 1.12E-04                | 0.022                      | 0.027  | 0.004 | 5.79E-10 | 14      |

Abbreviations: Chr, chromosome; SE, standard error

Supplemental Table 11. Top variants for each generalized locus for hip ratio adjusted for body mass index in SOL across known loci found in GIANT GWAS

| dbSNPID      | Region            | Chr | Position (build GRCh38) | Effect Allele | Other Allele | GIANT estimates |        |       | HCHS/SOL estimates |               |        |       | Meta-Analysis estimates |                        |        |       | Locus #  |         |
|--------------|-------------------|-----|-------------------------|---------------|--------------|-----------------|--------|-------|--------------------|---------------|--------|-------|-------------------------|------------------------|--------|-------|----------|---------|
|              |                   |     |                         |               |              | Effect Allele   | Beta   | SE    | P-value            | Effect Allele | Beta   | SE    | P-value                 | Generalization r-value | Beta   | SE    |          | P-value |
| <b>WOMEN</b> |                   |     |                         |               |              |                 |        |       |                    |               |        |       |                         |                        |        |       |          |         |
| rs2820443    | Regulatory Region | 1   | 217646790               | C             | T            | 0.300           | 0.062  | 0.005 | 4.30E-35           | 0.402         | 0.060  | 0.017 | 3.175E-04               | 0.047                  | 0.062  | 0.005 | 3.88E-38 | 1       |
| rs1346786    | EFEMP1            | 2   | 55734702                | C             | T            | 0.667           | 0.030  | 0.006 | 2.60E-07           | 0.691         | 0.081  | 0.018 | 6.000E-06               | 0.047                  | 0.035  | 0.006 | 4.12E-10 | 2       |
| rs17819328   | PPARG             | 3   | 12422843                | G             | T            | 0.450           | -0.028 | 0.005 | 1.60E-09           | 0.375         | -0.062 | 0.017 | 3.839E-04               | 0.047                  | -0.030 | 0.005 | 2.44E-11 | 3       |
| <b>ALL</b>   |                   |     |                         |               |              |                 |        |       |                    |               |        |       |                         |                        |        |       |          |         |
| rs761422     | MFAP2             | 1   | 16975285                | A             | G            | 0.440           | -0.028 | 0.005 | 1.40E-08           | 0.523         | -0.037 | 0.013 | 4.161E-03               | 0.040                  | -0.029 | 0.005 | 3.90E-10 | 4       |
| rs11205303   | MTMR11            | 1   | 149934520               | C             | T            | 0.358           | 0.042  | 0.004 | 6.40E-26           | 0.271         | 0.042  | 0.014 | 2.792E-03               | 0.037                  | 0.042  | 0.004 | 9.52E-28 | 5       |
| rs2494196    | Intergenic        | 1   | 217655862               | A             | C            | 0.250           | 0.051  | 0.005 | 7.60E-23           | 0.422         | 0.049  | 0.013 | 1.533E-04               | 0.018                  | 0.051  | 0.005 | 1.12E-26 | 1       |
| rs848607     | CRIM1             | 2   | 36396553                | A             | G            | 0.367           | -0.018 | 0.004 | 9.60E-07           | 0.455         | -0.043 | 0.013 | 7.675E-04               | 0.021                  | -0.020 | 0.004 | 1.99E-08 | 6       |
| rs1346786    | EFEMP1            | 2   | 55734702                | C             | T            | 0.667           | 0.030  | 0.005 | 5.40E-10           | 0.690         | 0.063  | 0.014 | 4.500E-06               | 0.013                  | 0.034  | 0.005 | 1.24E-13 | 2       |
| rs9872031    | PPARG             | 3   | 12429962                | A             | G            | 0.442           | -0.024 | 0.005 | 1.70E-07           | 0.377         | -0.047 | 0.013 | 3.930E-04               | 0.018                  | -0.026 | 0.004 | 1.14E-09 | 3       |
| rs2811469    | LXND1             | 3   | 131045304               | G             | A            | 0.708           | -0.037 | 0.006 | 5.30E-11           | 0.788         | -0.057 | 0.016 | 2.904E-04               | 0.018                  | -0.039 | 0.005 | 2.15E-13 | 7       |
| rs11936911   | LCORL             | 4   | 17556143                | G             | A            | 0.158           | -0.036 | 0.006 | 1.40E-08           | 0.209         | -0.049 | 0.016 | 1.688E-03               | 0.032                  | -0.038 | 0.006 | 9.57E-11 | 8       |
| rs7670141    |                   | 4   | 72863854                | A             | G            | 0.517           | -0.026 | 0.005 | 7.10E-09           | 0.604         | -0.056 | 0.013 | 1.740E-05               | 0.015                  | -0.029 | 0.004 | 6.67E-12 | 9       |
| rs1443537    |                   | 4   | 81448750                | A             | C            | 0.242           | 0.025  | 0.004 | 4.70E-10           | 0.332         | 0.042  | 0.013 | 1.539E-03               | 0.030                  | 0.026  | 0.004 | 5.37E-12 | 10      |
| rs3775380    | FAM13A            | 4   | 89037680                | G             | A            | 0.492           | -0.018 | 0.004 | 2.50E-07           | 0.491         | -0.057 | 0.013 | 6.970E-06               | 0.018                  | -0.021 | 0.003 | 7.72E-10 | 11      |
| rs2035742    | HHIP              | 4   | 144875668               | A             | G            | 0.958           | 0.044  | 0.009 | 3.40E-07           | 0.957         | 0.115  | 0.031 | 2.055E-04               | 0.018                  | 0.049  | 0.008 | 4.32E-09 | 12      |
| rs1147225    | NPR3              | 5   | 32823835                | C             | T            | 0.642           | 0.018  | 0.004 | 3.50E-07           | 0.577         | 0.037  | 0.013 | 4.326E-03               | 0.041                  | 0.019  | 0.003 | 1.13E-08 | 13      |
| rs1294438    | LOC101928004      | 6   | 6696825                 | C             | T            | 0.667           | -0.027 | 0.004 | 4.70E-12           | 0.512         | -0.044 | 0.013 | 5.751E-04               | 0.018                  | -0.028 | 0.004 | 2.37E-14 | 14      |
| rs4371882    | BMP6              | 6   | 7737935                 | A             | G            | 0.833           | -0.027 | 0.005 | 3.30E-09           | 0.809         | -0.055 | 0.016 | 6.764E-04               | 0.020                  | -0.029 | 0.004 | 2.20E-11 | 15      |
| rs1265083    | CCHCR1            | 6   | 31251549                | T             | G            | 0.008           | -0.073 | 0.015 | 9.20E-07           | 0.042         | -0.144 | 0.032 | 5.100E-06               | 0.018                  | -0.086 | 0.014 | 2.13E-10 | 16      |
| rs4140531    | ADGRG6            | 6   | 142405651               | G             | A            | 0.933           | 0.040  | 0.008 | 3.50E-07           | 0.910         | 0.065  | 0.022 | 3.673E-03               | 0.040                  | 0.043  | 0.007 | 6.63E-09 | 17      |
| rs7783400    | GNA12             | 7   | 2821326                 | A             | C            | 0.275           | -0.033 | 0.005 | 8.30E-12           | 0.280         | -0.041 | 0.014 | 3.479E-03               | 0.040                  | -0.034 | 0.005 | 9.34E-14 | 18      |
| rs42377      | CDK6              | 7   | 92452294                | A             | G            | 0.371           | 0.037  | 0.006 | 1.40E-11           | 0.297         | 0.038  | 0.014 | 6.272E-03               | 0.050                  | 0.037  | 0.005 | 3.84E-13 | 19      |
| rs10990768   | SLC35D2           | 9   | 95413062                | C             | T            | 0.858           | -0.031 | 0.006 | 5.50E-07           | 0.924         | -0.096 | 0.024 | 5.700E-05               | 0.018                  | -0.035 | 0.006 | 4.84E-09 | 20      |
| rs7082470    | JMJD1C            | 10  | 63187272                | G             | A            | 0.517           | -0.018 | 0.004 | 4.90E-07           | 0.679         | -0.043 | 0.014 | 1.742E-03               | 0.032                  | -0.020 | 0.003 | 8.66E-09 | 21      |
| rs10882717   | ENTPD1-AS1        | 10  | 96081177                | G             | C            | 0.692           | 0.023  | 0.005 | 6.10E-07           | 0.699         | 0.041  | 0.014 | 3.133E-03               | 0.038                  | 0.025  | 0.004 | 1.38E-08 | 22      |
| rs2701540    | MACROD1           | 11  | 63858211                | T             | A            | 0.042           | -0.048 | 0.010 | 9.90E-07           | 0.086         | -0.073 | 0.023 | 1.169E-03               | 0.028                  | -0.052 | 0.009 | 7.24E-09 | 23      |
| rs2160077    | Regulatory Region | 14  | 91031819                | G             | A            | 0.608           | 0.017  | 0.004 | 8.90E-07           | 0.677         | 0.038  | 0.014 | 4.611E-03               | 0.042                  | 0.018  | 0.003 | 6.26E-08 | 24      |
| rs8029016    | ADAMTSL3          | 15  | 82085127                | C             | T            | 0.475           | 0.036  | 0.003 | 1.80E-25           | 0.664         | 0.052  | 0.014 | 2.424E-04               | 0.018                  | 0.037  | 0.003 | 7.14E-29 | 25      |
| rs2281727    | SMG6              | 17  | 2161401                 | G             | A            | 0.333           | -0.018 | 0.004 | 5.30E-07           | 0.361         | -0.057 | 0.013 | 1.830E-05               | 0.018                  | -0.021 | 0.003 | 2.78E-09 | 26      |
| rs143499     | SMG6              | 17  | 2175780                 | T             | C            | 0.325           | -0.018 | 0.004 | 9.10E-07           | 0.365         | -0.057 | 0.013 | 1.750E-05               | 0.018                  | -0.021 | 0.003 | 2.75E-09 | 27      |
| rs4800451    | CABLES1           | 18  | 21390842                | T             | C            | 0.683           | 0.030  | 0.004 | 9.70E-14           | 0.634         | 0.043  | 0.013 | 1.178E-03               | 0.028                  | 0.031  | 0.004 | 1.88E-15 | 28      |
| rs158676     | CDK5RAP1          | 20  | 32850250                | G             | A            | 0.283           | -0.022 | 0.004 | 2.10E-09           | 0.246         | -0.042 | 0.015 | 4.904E-03               | 0.044                  | -0.023 | 0.003 | 4.04E-11 | 29      |
| rs2425060    | UQCC1             | 20  | 34790312                | T             | C            | 0.675           | -0.034 | 0.005 | 5.50E-13           | 0.710         | -0.042 | 0.014 | 2.659E-03               | 0.037                  | -0.035 | 0.004 | 5.54E-15 | 30      |

Abbreviations: Chr, chromosome; SE, standard error

**ST12. P-values from testing genetic scores for each of the traits and populations**

| Strata           | p-value<1e-8 | 1e-8<p-value<1e-7 | 1e-7<p-value<1e-6 |
|------------------|--------------|-------------------|-------------------|
| <b>WHRadjBMI</b> |              |                   |                   |
| MEN              | 9.00E-03     | 4.55E-02          | 3.02E-01          |
| WOMEN            | 5.95E-06     | 3.85E-03          | 8.36E-03          |
| ALL              | 2.00E-06     | 5.78E-03          | 2.87E-01          |
| <b>HIPadjBMI</b> |              |                   |                   |
| MEN              | 1.46E-10     | 2.14E-03          | 9.17E-02          |
| WOMEN            | 1.89E-11     | 2.36E-05          | 2.95E-02          |
| ALL              | 3.81E-07     | 6.46E-03          | 4.45E-05          |
| <b>WCadjBMI</b>  |              |                   |                   |
| MEN              | 1.17E-02     | 8.20E-05          | 4.33E-06          |
| WOMEN            | 2.74E-04     | 5.46E-01          | 1.62E-02          |
| ALL              | 9.41E-12     | 1.24E-03          | 9.68E-03          |

**Supplementary Table 13.** GWAS lookups of replication variants from current study in Phenoscanner. Only significant SNP-phenotype associations shown ( $P < 0.05/7631 = 6.55 \times 10^{-5}$ ).

| Discovery |            |     |              | Effect | Other  | GWAS                                                  | PMID/  |          |        |       |                |        |           |              |  |
|-----------|------------|-----|--------------|--------|--------|-------------------------------------------------------|--------|----------|--------|-------|----------------|--------|-----------|--------------|--|
| Trait     | dbSNPID    | CHR | POS (GRCh38) | Allele | Allele | Trait                                                 | Source | Ancestry | Beta   | SE    | P              | N      | N (cases) | N (controls) |  |
| WHRadjBMI | rs79478137 | 11  | 2891739      | C      | T      | Cause of death: multisystem degeneration              | UKBB   | European | -0.024 | 0.004 | <b>4.8E-11</b> | 7637   | 8         | 7629         |  |
| WHRadjBMI | rs79478137 | 11  | 2891739      | C      | T      | Cause of death: tongue, unspecified                   | UKBB   | European | -0.023 | 0.004 | <b>4.8E-08</b> | 7637   | 11        | 7626         |  |
| WHRadjBMI | rs79478137 | 11  | 2891739      | C      | T      | Home area population density: postcode not linkable   | UKBB   | European | -0.001 | 0.000 | <b>1.4E-07</b> | 333997 | 12        | 333985       |  |
| WCadjBMI  | rs3168072  | 11  | 61864038     | A      | T      | Cause of death: other specified respiratory disorders | UKBB   | European | -0.006 | 0.001 | <b>1.7E-06</b> | 7637   | 4         | 7633         |  |

**Supplementary Table 14. eQTL lookups of replicated variants from current study in Phenoscanner. Only significant SNP-Gene expression associations shown ( $P < 0.05/88 = 5.68 \times 10^{-4}$ ).**

| Discovery | POS        | Nearest | Effect    | Other    | PMID/  |        |          |             |                                 |                |        |       |                 |       |                          |  |  |  |
|-----------|------------|---------|-----------|----------|--------|--------|----------|-------------|---------------------------------|----------------|--------|-------|-----------------|-------|--------------------------|--|--|--|
| Trait     | dbSNPID    | CHR     | (GRCh38)  | Gene     | Allele | Allele | Source   | Ancestry    | Tissue                          | Gene           | Beta   | SE    | P               | N     | Dataset                  |  |  |  |
| WHRadjBMI | rs13301996 | 9       | 120570806 | CDK5RAP2 | G      | T      | 25954001 | Unspecified | Adipose subcutaneous            | MEGF9          | 0.293  | 0.055 | <b>1.9E-07</b>  | 385   | GTEEx-V7_eQTL_EUR_2017   |  |  |  |
| WHRadjBMI | rs13301996 | 9       | 120570806 | CDK5RAP2 | G      | T      | 25954001 | Unspecified | Adipose subcutaneous            | AHCYP2         | 0.351  | 0.084 | <b>4.1E-05</b>  | 385   | GTEEx-V7_eQTL_EUR_2017   |  |  |  |
| WHRadjBMI | rs13301996 | 9       | 120570806 | CDK5RAP2 | G      | T      | 25954001 | Unspecified | Adipose subcutaneous            | MEGF9          | 0.254  | 0.067 | <b>1.7E-04</b>  | 298   | GTEEx-V6p_eQTL_EUR_2016  |  |  |  |
| WHRadjBMI | rs13301996 | 9       | 120570806 | CDK5RAP2 | G      | T      | 25954001 | Unspecified | Adipose subcutaneous            | PSMD5-AS1      | 0.289  | 0.082 | <b>5.0E-04</b>  | 385   | GTEEx-V7_eQTL_EUR_2017   |  |  |  |
| WHRadjBMI | rs13301996 | 9       | 120570806 | CDK5RAP2 | G      | T      | 25954001 | Unspecified | Artery aorta                    | PSMD5-AS1      | 0.363  | 0.103 | <b>5.1E-04</b>  | 267   | GTEEx-V7_eQTL_EUR_2017   |  |  |  |
| WHRadjBMI | rs13301996 | 9       | 120570806 | CDK5RAP2 | G      | T      | 25954001 | Unspecified | Artery coronary                 | -              | 0.593  | 0.150 | <b>1.5E-04</b>  | 118   | GTEEx-V6p_eQTL_EUR_2016  |  |  |  |
| WHRadjBMI | rs13301996 | 9       | 120570806 | CDK5RAP2 | G      | T      | 25954001 | Unspecified | Artery tibial                   | PSMD5-AS1      | 0.458  | 0.087 | <b>2.5E-07</b>  | 388   | GTEEx-V7_eQTL_EUR_2017   |  |  |  |
| WHRadjBMI | rs13301996 | 9       | 120570806 | CDK5RAP2 | G      | T      | 25954001 | Unspecified | Artery tibial                   | PSMD5-AS1      | 0.436  | 0.102 | <b>3.0E-05</b>  | 285   | GTEEx-V6p_eQTL_EUR_2016  |  |  |  |
| WHRadjBMI | rs13301996 | 9       | 120570806 | CDK5RAP2 | G      | T      | 25954001 | Unspecified | Brain cerebellum                | PSMD5-AS1      | 0.564  | 0.152 | <b>3.9E-04</b>  | 103   | GTEEx-V6p_eQTL_EUR_2016  |  |  |  |
| WHRadjBMI | rs13301996 | 9       | 120570806 | CDK5RAP2 | G      | T      | 25954001 | Unspecified | Colon sigmoid                   | PSMD5-AS1      | 0.404  | 0.110 | <b>3.1E-04</b>  | 203   | GTEEx-V7_eQTL_EUR_2017   |  |  |  |
| WHRadjBMI | rs13301996 | 9       | 120570806 | CDK5RAP2 | G      | T      | 25954001 | Unspecified | Colon sigmoid                   | PSMD5-AS1      | 0.511  | 0.142 | <b>5.1E-04</b>  | 124   | GTEEx-V6p_eQTL_EUR_2016  |  |  |  |
| WHRadjBMI | rs13301996 | 9       | 120570806 | CDK5RAP2 | G      | T      | 25954001 | Unspecified | Colon sigmoid                   | AHCYP2         | 0.346  | 0.098 | <b>5.5E-04</b>  | 203   | GTEEx-V7_eQTL_EUR_2017   |  |  |  |
| WHRadjBMI | rs13301996 | 9       | 120570806 | CDK5RAP2 | G      | T      | 25954001 | Unspecified | Esophagus muscularis            | PSMD5-AS1      | 0.407  | 0.091 | <b>1.2E-05</b>  | 335   | GTEEx-V7_eQTL_EUR_2017   |  |  |  |
| WHRadjBMI | rs13301996 | 9       | 120570806 | CDK5RAP2 | G      | T      | 25954001 | Unspecified | Esophagus muscularis            | PSMD5-AS1      | 0.451  | 0.112 | <b>7.8E-05</b>  | 218   | GTEEx-V6p_eQTL_EUR_2016  |  |  |  |
| WHRadjBMI | rs13301996 | 9       | 120570806 | CDK5RAP2 | G      | T      | 25954001 | Unspecified | Esophagus muscularis            | AHCYP2         | 0.309  | 0.088 | <b>5.3E-04</b>  | 335   | GTEEx-V7_eQTL_EUR_2017   |  |  |  |
| WHRadjBMI | rs13301996 | 9       | 120570806 | CDK5RAP2 | G      | T      | 25954001 | Unspecified | Liver                           | PSMD5          | 0.354  | 0.093 | <b>2.2E-04</b>  | 153   | GTEEx-V7_eQTL_EUR_2017   |  |  |  |
| WHRadjBMI | rs13301996 | 9       | 120570806 | CDK5RAP2 | G      | T      | 25954001 | Unspecified | Liver                           | PSMD5-AS1      | 0.361  | 0.100 | <b>4.6E-04</b>  | 153   | GTEEx-V7_eQTL_EUR_2017   |  |  |  |
| WHRadjBMI | rs13301996 | 9       | 120570806 | CDK5RAP2 | G      | T      | 25954001 | Unspecified | Lung                            | PSMD5-AS1      | 0.349  | 0.076 | <b>6.7E-06</b>  | 383   | GTEEx-V7_eQTL_EUR_2017   |  |  |  |
| WHRadjBMI | rs13301996 | 9       | 120570806 | CDK5RAP2 | G      | T      | 25954001 | Unspecified | Muscle skeletal                 | PSMD5          | 0.261  | 0.056 | <b>4.1E-06</b>  | 491   | GTEEx-V7_eQTL_EUR_2017   |  |  |  |
| WHRadjBMI | rs13301996 | 9       | 120570806 | CDK5RAP2 | G      | T      | 25954001 | Unspecified | Muscle skeletal                 | PSMD5          | 0.327  | 0.070 | <b>4.5E-06</b>  | 361   | GTEEx-V6p_eQTL_EUR_2016  |  |  |  |
| WHRadjBMI | rs13301996 | 9       | 120570806 | CDK5RAP2 | G      | T      | 25954001 | Unspecified | Muscle skeletal                 | PSMD5-AS1      | 0.302  | 0.072 | <b>3.7E-05</b>  | 491   | GTEEx-V7_eQTL_EUR_2017   |  |  |  |
| WHRadjBMI | rs13301996 | 9       | 120570806 | CDK5RAP2 | G      | T      | 25954001 | Unspecified | Muscle skeletal                 | PSMD5-AS1      | 0.320  | 0.090 | <b>4.2E-04</b>  | 361   | GTEEx-V6p_eQTL_EUR_2016  |  |  |  |
| WHRadjBMI | rs13301996 | 9       | 120570806 | CDK5RAP2 | G      | T      | 25954001 | Unspecified | Nerve tibial                    | PSMD5-AS1      | 0.461  | 0.091 | <b>6.6E-07</b>  | 361   | GTEEx-V7_eQTL_EUR_2017   |  |  |  |
| WHRadjBMI | rs13301996 | 9       | 120570806 | CDK5RAP2 | G      | T      | 25954001 | Unspecified | Nerve tibial                    | PSMD5-AS1      | 0.428  | 0.105 | <b>6.2E-05</b>  | 256   | GTEEx-V6p_eQTL_EUR_2016  |  |  |  |
| WHRadjBMI | rs13301996 | 9       | 120570806 | CDK5RAP2 | G      | T      | 25954001 | Unspecified | Skin not sun exposed suprapubic | PSMD5-AS1      | 0.333  | 0.083 | <b>8.3E-05</b>  | 335   | GTEEx-V7_eQTL_EUR_2017   |  |  |  |
| WHRadjBMI | rs13301996 | 9       | 120570806 | CDK5RAP2 | G      | T      | 25954001 | Unspecified | Skin sun exposed lower leg      | PSMD5-AS1      | 0.328  | 0.082 | <b>7.5E-05</b>  | 414   | GTEEx-V7_eQTL_EUR_2017   |  |  |  |
| WHRadjBMI | rs13301996 | 9       | 120570806 | CDK5RAP2 | G      | T      | 25954001 | Unspecified | Skin sun exposed lower leg      | PSMD5-AS1      | 0.387  | 0.096 | <b>8.0E-05</b>  | 302   | GTEEx-V6p_eQTL_EUR_2016  |  |  |  |
| WHRadjBMI | rs13301996 | 9       | 120570806 | CDK5RAP2 | G      | T      | 25954001 | Unspecified | Skin sun exposed lower leg      | MEGF9          | 0.123  | 0.033 | <b>2.8E-04</b>  | 302   | GTEEx-V6p_eQTL_EUR_2016  |  |  |  |
| WHRadjBMI | rs13301996 | 9       | 120570806 | CDK5RAP2 | G      | T      | 27863251 | European    | T cells                         | MEGF9          | -0.437 | 0.126 | <b>5.5E-04</b>  | 169   | BLUEPRINT_eQTL_EUR_2016  |  |  |  |
| WHRadjBMI | rs13301996 | 9       | 120570806 | CDK5RAP2 | G      | T      | 25954001 | Unspecified | Testis                          | CDK5RAP2       | 0.251  | 0.060 | <b>4.8E-05</b>  | 225   | GTEEx-V7_eQTL_EUR_2017   |  |  |  |
| WHRadjBMI | rs13301996 | 9       | 120570806 | CDK5RAP2 | G      | T      | 25954001 | Unspecified | Thyroid                         | PSMD5-AS1      | 0.395  | 0.082 | <b>2.4E-06</b>  | 399   | GTEEx-V7_eQTL_EUR_2017   |  |  |  |
| WHRadjBMI | rs13301996 | 9       | 120570806 | CDK5RAP2 | G      | T      | 25954001 | Unspecified | Thyroid                         | PSMD5          | 0.194  | 0.051 | <b>1.8E-04</b>  | 399   | GTEEx-V7_eQTL_EUR_2017   |  |  |  |
| WHRadjBMI | rs13301996 | 9       | 120570806 | CDK5RAP2 | G      | T      | 25954001 | Unspecified | Thyroid                         | PSMD5-AS1      | 0.365  | 0.101 | <b>3.6E-04</b>  | 278   | GTEEx-V6p_eQTL_EUR_2016  |  |  |  |
| WHRadjBMI | rs13301996 | 9       | 120570806 | CDK5RAP2 | G      | T      | eQTLGen  | European    | Whole blood                     | MEGF9          | NA     | NA    | <b>1.8E-149</b> | 30523 | eQTLGen_eQTL_EUR_2018    |  |  |  |
| WHRadjBMI | rs13301996 | 9       | 120570806 | CDK5RAP2 | G      | T      | eQTLGen  | European    | Whole blood                     | RP11-271.2     | NA     | NA    | <b>8.5E-107</b> | 16488 | eQTLGen_eQTL_EUR_2018    |  |  |  |
| WHRadjBMI | rs13301996 | 9       | 120570806 | CDK5RAP2 | G      | T      | eQTLGen  | European    | Whole blood                     | CDK5RAP2       | NA     | NA    | <b>1.7E-61</b>  | 30737 | eQTLGen_eQTL_EUR_2018    |  |  |  |
| WHRadjBMI | rs13301996 | 9       | 120570806 | CDK5RAP2 | G      | T      | eQTLGen  | European    | Whole blood                     | PSMD5          | NA     | NA    | <b>1.6E-10</b>  | 30737 | eQTLGen_eQTL_EUR_2018    |  |  |  |
| WHRadjBMI | rs13301996 | 9       | 120570806 | CDK5RAP2 | G      | T      | eQTLGen  | European    | Whole blood                     | PHF19          | NA     | NA    | <b>1.0E-08</b>  | 29988 | eQTLGen_eQTL_EUR_2018    |  |  |  |
| WHRadjBMI | rs13301996 | 9       | 120570806 | CDK5RAP2 | G      | T      | eQTLGen  | European    | Whole blood                     | GGTA1P         | NA     | NA    | <b>1.5E-07</b>  | 24529 | eQTLGen_eQTL_EUR_2018    |  |  |  |
| WHRadjBMI | rs13301996 | 9       | 120570806 | CDK5RAP2 | G      | T      | 28122634 | Mixed       | Whole blood                     | MEGF9          | -0.018 | 0.003 | <b>2.6E-07</b>  | 5257  | Joehanes-R_eQTL_EUR_2017 |  |  |  |
| WHRadjBMI | rs13301996 | 9       | 120570806 | CDK5RAP2 | G      | T      | 28122634 | Mixed       | Whole blood                     | CYP4Z1,CYP4Z2P | -0.030 | 0.007 | <b>7.7E-06</b>  | 5257  | Joehanes-R_eQTL_EUR_2017 |  |  |  |
| WHRadjBMI | rs13301996 | 9       | 120570806 | CDK5RAP2 | G      | T      | 28122634 | Mixed       | Whole blood                     | RAB14          | 0.015  | 0.003 | <b>7.8E-06</b>  | 5257  | Joehanes-R_eQTL_EUR_2017 |  |  |  |
| WHRadjBMI | rs13301996 | 9       | 120570806 | CDK5RAP2 | G      | T      | eQTLGen  | European    | Whole blood                     | RAB14          | NA     | NA    | <b>8.0E-06</b>  | 29988 | eQTLGen_eQTL_EUR_2018    |  |  |  |

|           |            |    |           |          |   |   |          |             |                                   |                         |        |       |         |       |                          |
|-----------|------------|----|-----------|----------|---|---|----------|-------------|-----------------------------------|-------------------------|--------|-------|---------|-------|--------------------------|
| WHRadjBMI | rs13301996 | 9  | 120570806 | CDK5RAP2 | G | T | 28122634 | Mixed       | Whole blood                       | BPIFB3                  | 0.013  | 0.003 | 3.9E-05 | 5257  | Joehanes-R_eQTL_EUR_2017 |
| WHRadjBMI | rs13301996 | 9  | 120570806 | CDK5RAP2 | G | T | 28122634 | Mixed       | Whole blood                       | PSMD5                   | 0.018  | 0.004 | 4.4E-05 | 5257  | Joehanes-R_eQTL_EUR_2017 |
| WHRadjBMI | rs13301996 | 9  | 120570806 | CDK5RAP2 | G | T | 28122634 | Mixed       | Whole blood                       | RBM3;SLC38A5            | 0.013  | 0.003 | 5.1E-05 | 5257  | Joehanes-R_eQTL_EUR_2017 |
| WHRadjBMI | rs13301996 | 9  | 120570806 | CDK5RAP2 | G | T | 28122634 | Mixed       | Whole blood                       | SIN3A                   | 0.010  | 0.002 | 7.7E-05 | 5257  | Joehanes-R_eQTL_EUR_2017 |
| WHRadjBMI | rs13301996 | 9  | 120570806 | CDK5RAP2 | G | T | 25954001 | Unspecified | Whole blood                       | PSMD5-AS1               | 0.270  | 0.068 | 9.4E-05 | 369   | GTEX-V7_eQTL_EUR_2017    |
| WHRadjBMI | rs13301996 | 9  | 120570806 | CDK5RAP2 | G | T | 28122634 | Mixed       | Whole blood                       | MRPL14                  | -0.019 | 0.005 | 9.9E-05 | 5257  | Joehanes-R_eQTL_EUR_2017 |
| HIPadjBMI | rs28692724 | 14 | 77027445  | IRF2BPL  | C | T | eQTLGen  | European    | Whole blood                       | IRF2BPL                 | NA     | NA    | 8.6E-23 | 6544  | eQTLGen_eQTL_EUR_2018    |
| HIPadjBMI | rs28692724 | 14 | 77027445  | IRF2BPL  | C | T | 27918533 | European    | Whole blood                       | RP11-7F17.5             | NA     | NA    | 2.1E-10 | 2116  | BIOSQTL_eQTL_EUR_2017    |
| HIPadjBMI | rs28692724 | 14 | 77027445  | IRF2BPL  | C | T | 27918533 | European    | Whole blood                       | RP11-7F17.5;RP11-7F17.3 | NA     | NA    | 1.4E-09 | 2116  | BIOSQTL_eQTL_EUR_2017    |
| HIPadjBMI | rs28692724 | 14 | 77027445  | IRF2BPL  | C | T | 27918533 | European    | Whole blood                       | RP11-7F17.3             | NA     | NA    | 1.6E-09 | 2116  | BIOSQTL_eQTL_EUR_2017    |
| HIPadjBMI | rs28692724 | 14 | 77027445  | IRF2BPL  | C | T | 27918533 | European    | Whole blood                       | RP11-7F17.7             | NA     | NA    | 2.2E-08 | 2116  | BIOSQTL_eQTL_EUR_2017    |
| HIPadjBMI | rs28692724 | 14 | 77027445  | IRF2BPL  | C | T | 27918533 | European    | Whole blood                       | IRF2BPL                 | NA     | NA    | 2.3E-07 | 2116  | BIOSQTL_eQTL_EUR_2017    |
| HIPadjBMI | rs28692724 | 14 | 77027445  | IRF2BPL  | C | T | 25954001 | Unspecified | Colon sigmoid                     | ANGEL1                  | 0.447  | 0.119 | 2.7E-04 | 124   | GTEX-V6p_eQTL_EUR_2016   |
| WCadjBMI  | rs3168072  | 11 | 61864038  | FADS2    | A | T | 25954001 | Unspecified | Artery tibial                     | INCENP                  | -0.623 | 0.129 | 2.5E-06 | 285   | GTEX-V6p_eQTL_EUR_2016   |
| WCadjBMI  | rs3168072  | 11 | 61864038  | FADS2    | A | T | 25954001 | Unspecified | Artery tibial                     | INCENP                  | -0.358 | 0.101 | 4.6E-04 | 388   | GTEX-V7_eQTL_EUR_2017    |
| WCadjBMI  | rs3168072  | 11 | 61864038  | FADS2    | A | T | 25954001 | Unspecified | Brain caudate basal ganglia       | LRRN4CL                 | 1.155  | 0.325 | 5.4E-04 | 144   | GTEX-V7_eQTL_EUR_2017    |
| WCadjBMI  | rs3168072  | 11 | 61864038  | FADS2    | A | T | 25954001 | Unspecified | Cells EBV-transformed lymphocytes | SDHAF2                  | 0.865  | 0.229 | 2.8E-04 | 117   | GTEX-V7_eQTL_EUR_2017    |
| WCadjBMI  | rs3168072  | 11 | 61864038  | FADS2    | A | T | 25954001 | Unspecified | Nerve tibial                      | SDHAF2                  | 0.551  | 0.155 | 4.6E-04 | 256   | GTEX-V6p_eQTL_EUR_2016   |
| WCadjBMI  | rs3168072  | 11 | 61864038  | FADS2    | A | T | 25954001 | Unspecified | Pancreas                          | UBXN1                   | 0.411  | 0.110 | 2.5E-04 | 220   | GTEX-V7_eQTL_EUR_2017    |
| WCadjBMI  | rs3168072  | 11 | 61864038  | FADS2    | A | T | 25954001 | Unspecified | Skin not sun exposed suprapubic   | TAF6L                   | 0.368  | 0.098 | 2.1E-04 | 335   | GTEX-V7_eQTL_EUR_2017    |
| WCadjBMI  | rs3168072  | 11 | 61864038  | FADS2    | A | T | 25954001 | Unspecified | Skin sun exposed lower leg        | TMEM258                 | -0.409 | 0.117 | 5.6E-04 | 302   | GTEX-V6p_eQTL_EUR_2016   |
| WCadjBMI  | rs3168072  | 11 | 61864038  | FADS2    | A | T | 25954001 | Unspecified | Small intestine terminal ileum    | SDHAF2                  | 0.813  | 0.210 | 1.9E-04 | 122   | GTEX-V7_eQTL_EUR_2017    |
| WCadjBMI  | rs3168072  | 11 | 61864038  | FADS2    | A | T | eQTLGen  | European    | Whole blood                       | TMEM258                 | NA     | NA    | 5.8E-11 | 25068 | eQTLGen_eQTL_EUR_2018    |
| WCadjBMI  | rs3168072  | 11 | 61864038  | FADS2    | A | T | 28122634 | Mixed       | Whole blood                       | C11orf10                | -0.053 | 0.009 | 1.3E-09 | 5257  | Joehanes-R_eQTL_EUR_2017 |
| WCadjBMI  | rs3168072  | 11 | 61864038  | FADS2    | A | T | 28122634 | Mixed       | Whole blood                       | XG;XGPY2                | 0.049  | 0.012 | 2.9E-05 | 5257  | Joehanes-R_eQTL_EUR_2017 |
| WCadjBMI  | rs3168072  | 11 | 61864038  | FADS2    | A | T | eQTLGen  | European    | Whole blood                       | FTH1                    | NA     | NA    | 3.3E-05 | 30638 | eQTLGen_eQTL_EUR_2018    |
| WCadjBMI  | rs3168072  | 11 | 61864038  | FADS2    | A | T | 28122634 | Mixed       | Whole blood                       | APOA4                   | -0.056 | 0.014 | 4.7E-05 | 5257  | Joehanes-R_eQTL_EUR_2017 |
| WCadjBMI  | rs3168072  | 11 | 61864038  | FADS2    | A | T | eQTLGen  | European    | Whole blood                       | MYRF                    | NA     | NA    | 5.7E-05 | 25068 | eQTLGen_eQTL_EUR_2018    |
| WCadjBMI  | rs3168072  | 11 | 61864038  | FADS2    | A | T | 28122634 | Mixed       | Whole blood                       | MED21                   | -0.046 | 0.011 | 6.0E-05 | 5257  | Joehanes-R_eQTL_EUR_2017 |
| WCadjBMI  | rs3168072  | 11 | 61864038  | FADS2    | A | T | 28122634 | Mixed       | Whole blood                       | POU4F2                  | 0.040  | 0.010 | 6.4E-05 | 5257  | Joehanes-R_eQTL_EUR_2017 |
| WCadjBMI  | rs3168072  | 11 | 61864038  | FADS2    | A | T | eQTLGen  | European    | Whole blood                       | FADS1                   | NA     | NA    | 5.0E-04 | 31062 | eQTLGen_eQTL_EUR_2018    |

**Supplementary Table 15.** mQTL lookups of replicated variants from current study in Phenoscanner. Only significant SNP-metabolite associations shown ( $P < 0.05/488 = P < 1.02 \times 10^{-4}$ ).

| Discovery |           | POS | Effect   | Other  |        | PMID/                                                     |          |          |        |       |                |       |
|-----------|-----------|-----|----------|--------|--------|-----------------------------------------------------------|----------|----------|--------|-------|----------------|-------|
| Trait     | dbSNPID   | CHR | (GRCh38) | Allele | Allele | Metabolite                                                | Source   | Ancestry | Beta   | SE    | P              | N     |
| WCadjBMI  | rs3168072 | 11  | 61864038 | A      | T      | Other polyunsaturated fatty acids than 18:2               | 27005778 | European | 0.235  | 0.034 | <b>7.4E-12</b> | 13549 |
| WCadjBMI  | rs3168072 | 11  | 61864038 | A      | T      | CH2 groups in fatty acids                                 | 27005778 | European | -0.169 | 0.032 | <b>1.3E-07</b> | 19021 |
| WCadjBMI  | rs3168072 | 11  | 61864038 | A      | T      | Ratio of bis allylic bonds to double bonds in lipids      | 27005778 | European | 0.180  | 0.034 | <b>1.8E-07</b> | 13524 |
| WCadjBMI  | rs3168072 | 11  | 61864038 | A      | T      | CH2 groups to double bonds ratio                          | 27005778 | European | -0.171 | 0.034 | <b>5.7E-07</b> | 13532 |
| WCadjBMI  | rs3168072 | 11  | 61864038 | A      | T      | Ratio of bis allylic bonds to total fatty acids in lipids | 27005778 | European | 0.171  | 0.035 | <b>9.3E-07</b> | 13171 |

**Supplementary Table 16.** Lookups of replicated variants and variants in high LD ( $R^2 > 0.8$ ) HaploReg v4.1.

| SOL SNP           | Trait                | CHR | POS(hg38) | R <sup>2</sup> | D'    | rsID              | REF | ALT | AFR  | AMR  | ASN  | EUR    | Chromatin States                           | Chromatin States Imputed       |
|-------------------|----------------------|-----|-----------|----------------|-------|-------------------|-----|-----|------|------|------|--------|--------------------------------------------|--------------------------------|
| rs13301996        | WHRadjBMI (Combined) | 9   | 120569993 | 0.84           | 1     | rs13299371        | A   | T   | 0.13 | 0.19 | 0.09 | 0.17   | E017,6_EnhG;E049,6_EnhG;E068,6_EnhG;E06    | E017,11_TxEnh3;E026,11_TxEnh3; |
| <b>rs13301996</b> | WHRadjBMI (Combined) | 9   | 120570806 | 1              | 1     | <b>rs13301996</b> | T   | G   | 0.13 | 0.22 | 0.09 | 0.18   | E017,6_EnhG;E023,7_Enh;E026,7_Enh;E027,7   | E006,11_TxEnh3;E017,11_TxEnh3; |
| rs79478137        | WHRadjBMI (Women)    | 11  | 2888469   | 1              | 1     | rs80153297        | C   | T   | 0.09 | 0.02 | 0.01 | 0.0026 | E001,12_EnhBiv;E003,12_EnhBiv;E005,7_Enh;  | E005,16_EnhW1;E006,16_EnhW1;   |
| rs79478137        | WHRadjBMI (Women)    | 11  | 2888527   | 1              | 1     | rs76505120        | C   | T   | 0.11 | 0.02 | 0    | 0.0013 | E001,12_EnhBiv;E003,12_EnhBiv;E005,7_Enh;  | E005,16_EnhW1;E006,16_EnhW1;   |
| <b>rs79478137</b> | WHRadjBMI (Women)    | 11  | 2891739   | 1              | 1     | <b>rs79478137</b> | C   | T   | 0.1  | 0.02 | 0.01 | 0.01   | E001,7_Enh;E002,7_Enh;E003,7_Enh;E004,7_   | E001,14_EnhA2;E002,17_EnhW2;E  |
| rs79478137        | WHRadjBMI (Women)    | 11  | 2892257   | 1              | 1     | rs114179983       | A   | T   | 0.09 | 0.02 | 0    | 0.0013 | E001,1_TssA;E003,7_Enh;E005,7_Enh;E006,2   | E001,2_PromU;E002,2_PromU;E00  |
| rs79478137        | WHRadjBMI (Women)    | 11  | 2894144   | 1              | 1     | rs12282506        | G   | A   | 0.11 | 0.02 | 0    | 0.0013 | E018,10_TssBiv                             | E007,19_DNase;E117,19_DNase    |
| rs79478137        | WHRadjBMI (Women)    | 11  | 2894333   | 0.8            | 1     | rs114826751       | G   | C   | 0.1  | 0.03 | 0    | 0.004  | E090,7_Enh                                 |                                |
| rs79478137        | WHRadjBMI (Women)    | 11  | 2894922   | 1              | 1     | rs12269740        | T   | G   | 0.09 | 0.02 | 0    | 0.0013 | E089,12_EnhBiv;E090,7_Enh                  |                                |
| rs79478137        | WHRadjBMI (Women)    | 11  | 2896281   | 1              | 1     | rs12276467        | G   | A   | 0.09 | 0.02 | 0    | 0.0013 | E059,6_EnhG                                | E056,17_EnhW2;E059,17_EnhW2    |
| rs79478137        | WHRadjBMI (Women)    | 11  | 2896432   | 1              | 1     | rs12290113        | C   | T   | 0.09 | 0.02 | 0    | 0.0013 | E056,12_EnhBiv;E059,7_Enh;E089,12_EnhBiv   | E056,17_EnhW2;E059,17_EnhW2    |
| rs3168072         | WCadjBMI (Combined)  | 11  | 61860488  | 0.92           | 0.96  | rs74771917        | C   | T   | 0.06 | 0.32 | 0.2  | 0.04   | E027,7_Enh;E056,3_TxFlnk;E057,6_EnhG;E063  | E027,11_TxEnh3;E055,11_TxEnh3; |
| rs3168072         | WCadjBMI (Combined)  | 11  | 61862661  | 0.96           | 1     | rs11605884        | T   | C   | 0.08 | 0.33 | 0.24 | 0.04   | E022,6_EnhG;E055,6_EnhG;E056,3_TxFlnk;E0   | E055,11_TxEnh3;E056,11_TxEnh3; |
| <b>rs3168072</b>  | WCadjBMI (Combined)  | 11  | 61864038  | 1              | 1     | <b>rs3168072</b>  | A   | T   | 0.01 | 0.32 | 0.21 | 0.04   | E022,6_EnhG                                | E056,11_TxEnh3                 |
| rs3168072         | WCadjBMI (Combined)  | 11  | 61864838  | 0.91           | 0.99  | rs12577276        | A   | G   | 0.2  | 0.33 | 0.21 | 0.04   |                                            |                                |
| rs3168072         | WCadjBMI (Combined)  | 11  | 61874245  | 0.9            | -0.97 | rs7115739         | T   | G   | 0.66 | 0.67 | 0.76 | 0.96   | E024,7_Enh;E052,6_EnhG;E055,6_EnhG;E056    | E005,17_EnhW2;E007,17_EnhW2;   |
| <b>rs28692724</b> | HIPadjBMI (Women)    | 14  | 77027445  | 1              | 1     | <b>rs28692724</b> | C   | T   | 0.25 | 0.32 | 0.29 | 0.29   | E001,1_TssA;E003,1_TssA;E004,1_TssA;E005,1 | E001,3_PromD1;E002,3_PromD1;E  |



| Chromatin Marks      | DNase     | Proteins    | eQTL     | Motifs     | GENCODE   | GENCODE   | RefSeq ID | RefSeq Gene Name | dbSNP | Fun       | Enhancer                      | Histone Marks |
|----------------------|-----------|-------------|----------|------------|-----------|-----------|-----------|------------------|-------|-----------|-------------------------------|---------------|
| E007,H3K9ac_Pro;E017 |           | .           | GTex2015 | Foxc1_2;PT | ENSG00000 | CDK5RAP2  | NM_018249 | CDK5RAP2         |       | Intronic  |                               |               |
| E006,H3K4me1_Enh;E0  |           | .           | GTex2015 | Ahr_1;Ma   | ENSG00000 | CDK5RAP2  | NM_018249 | CDK5RAP2         |       | Intronic  |                               |               |
| E001,H3K4me1_Enh;E0  | E003;E004 | A549,CTCF   | .        | BCL_disc9  | ENSG00000 | SLC22A18A | NM_007105 | SLC22A18AS       |       | Nonsynony | SKIN, CRVX                    |               |
| E001,H3K4me1_Enh;E0  | E003;E004 | A549,CTCF   | .        | Sin3Ak-20  | ENSG00000 | SLC22A18A | NM_007105 | SLC22A18AS       |       | Nonsynony | SKIN, CRVX                    |               |
| E001,H3K4me1_Enh;E0  | E007;E051 | .           | .        | .          | ENSG00000 | SLC22A18A | NM_007105 | SLC22A18AS       |       | Intronic  | IPSC, BLD, GI, CRVX           |               |
| E001,H3K4me1_Enh;E0  | E003;E004 | A549,CTCF   | .        | HDAC2_dis  | ENSG00000 | SLC22A18A | NM_007105 | SLC22A18AS       |       | Intronic  | ESC, ESDR, LNG, IPSC, FAT, ST |               |
| E006,H3K4me3_Pro;E0  | E007;E093 | .           | .        | .          | ENSG00000 | SLC22A18A | NM_007105 | SLC22A18AS       |       | Intronic  | IPSC                          |               |
| E007,H3K4me3_Pro;E0  |           | .           | .        | EBF_disc2; | ENSG00000 | SLC22A18A | NM_007105 | SLC22A18AS       |       | Intronic  |                               |               |
| E006,H3K4me1_Enh;E0  | E032;E034 | .           | .        | PLAG1      | ENSG00000 | SLC22A18A | NM_007105 | SLC22A18AS       |       | Intronic  |                               |               |
| E006,H3K4me1_Enh;E0  | E100      | .           | .        | THAP1_dis  | ENSG00000 | SLC22A18A | NM_007105 | SLC22A18AS       |       | Intronic  |                               |               |
| E006,H3K4me1_Enh;E0  | E097;E100 | .           | .        | EWSR1-FLI  | ENSG00000 | SLC22A18A | NM_007105 | SLC22A18AS       |       | Intronic  |                               |               |
| E005,H3K4me1_Enh;E0  | E004;E022 | K562,ELF1   | GTex2015 | BRCA1_knc  | ENSG00000 | FADS2     | NM_004265 | FADS2            |       | Intronic  | BLD                           |               |
| E005,H3K4me1_Enh;E0  |           | .           | .        | CAC-bindin | ENSG00000 | FADS2     | NM_004265 | FADS2            |       | Intronic  |                               |               |
| E005,H3K4me1_Enh;E0  |           | .           | GTex2015 | GCM;Maf    | ENSG00000 | FADS2     | NM_004265 | FADS2            |       | Intronic  |                               |               |
| E002,H3K9ac_Pro;E005 |           | .           | .        | EWSR1-FLI  | ENSG00000 | FADS2     | NM_004265 | FADS2            |       | Intronic  |                               |               |
| E001,H3K4me1_Enh;E0  | E059;E081 | HSMM,CTC    | .        | ZID        | ENSG00000 | FADS3     | NM_021727 | FADS3            |       | Intronic  |                               |               |
| E001,H3K4me3_Pro;E0  | E004;E006 | Fibrobl,CTC | .        | Myf_1;NRS  | ENSG00000 | IRF2BPL   | NM_024496 | IRF2BPL          |       | Synonymo  | ESC, ESDR, LNG, IPSC, FAT, ST |               |
